# Supplementary material
Source: Research Square preprint supplement (doi:10.21203/rs.3.rs-9888793/v1)
Supplement: Supplementary file 1 [file 0dd543a49a8689262328b553.pdf]

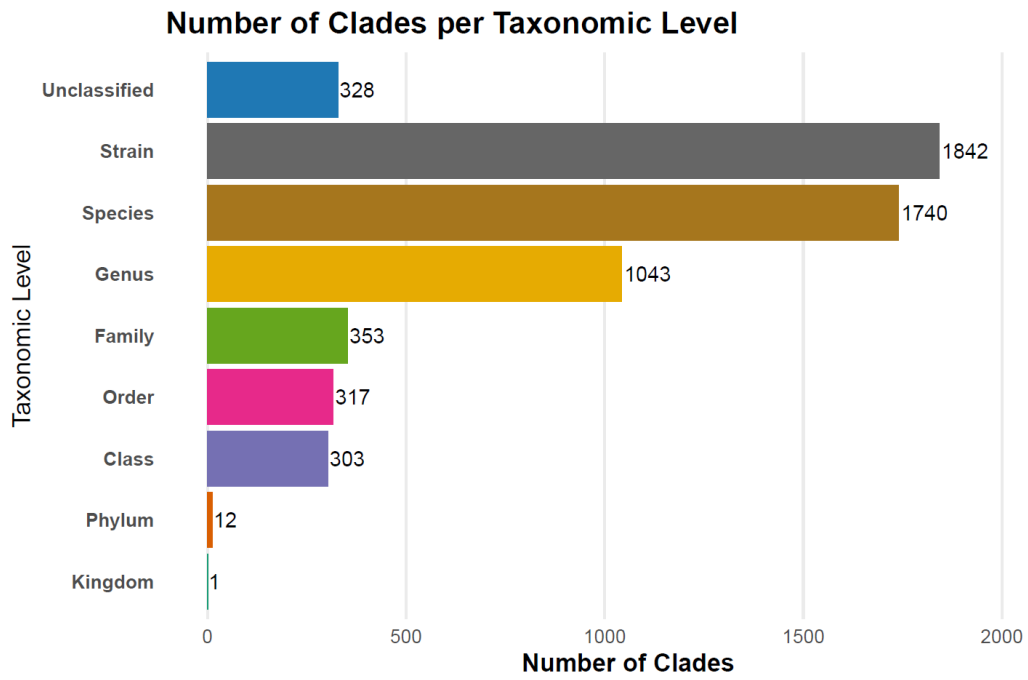

**Supplementary Figure 1: Bar plots of microbial clades across taxonomic levels.** Bars represent the number of microbial taxa at the phylum, class, order, family, and genus, species, strains, and unclassified levels. Each color corresponds to a distinct clade.

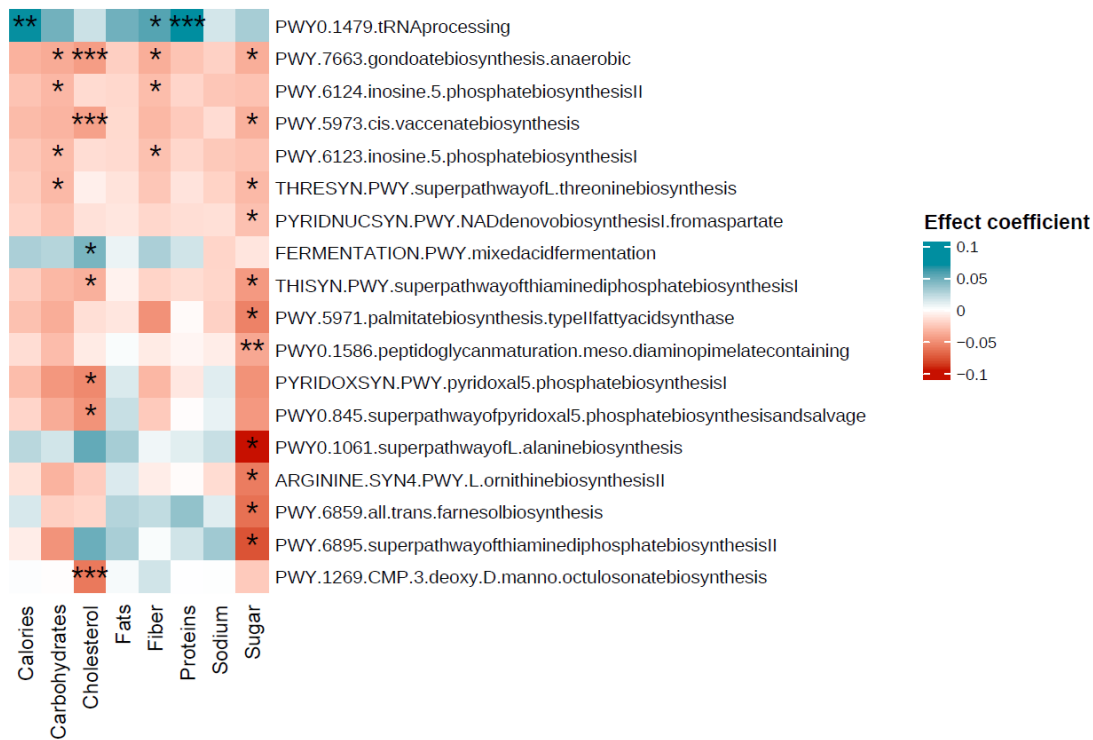

**Supplementary Figure 2: Heatmap showing associations between pathways and nutrient intake (Nutrients 3days).** Heatmap of associations between microbial pathways and nutrient intake, calculated as the 3-days average prior to fecal sample collection. Squares are colored according to the effect size of the association, as in the side legend. Asterisks mark level of significance (\*  $q < 0.25$ , \*\*  $q < 0.1$ , \*\*\*  $q < 0.05$ ).



**Supplementary Figure 3: Heatmap showing associations between pathways and food habits.** Heatmap of associations between microbial pathways and food habits from frequency food questionnaires. Squares are colored according to the effect size of the association, as in the side legend. Asterisks mark level of significance (\*  $q < 0.25$ , \*\*  $q < 0.1$ ).

A.

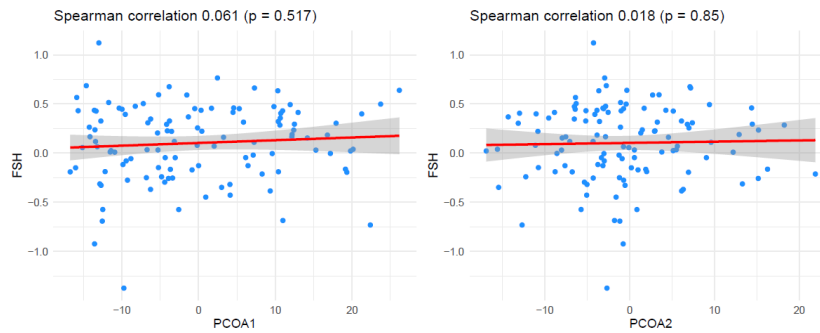

B.

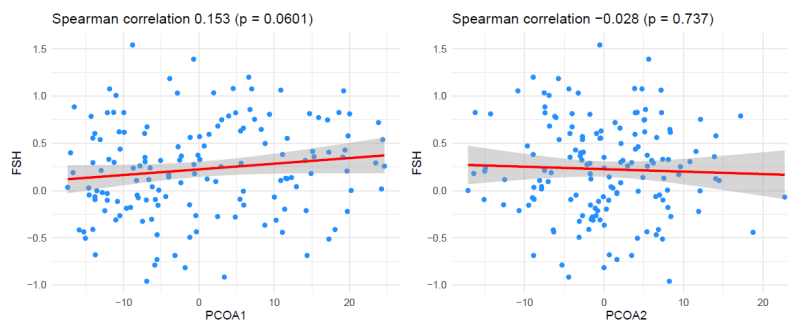

C.

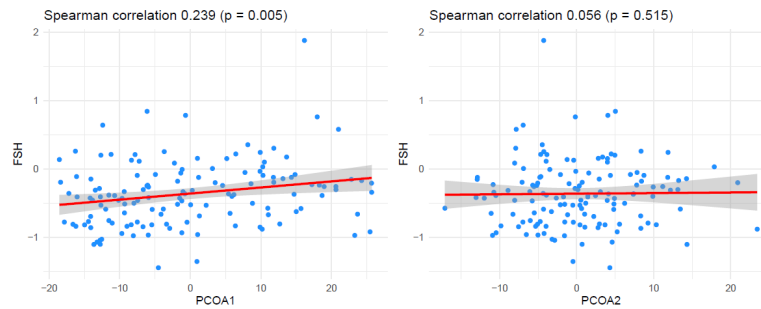

D.

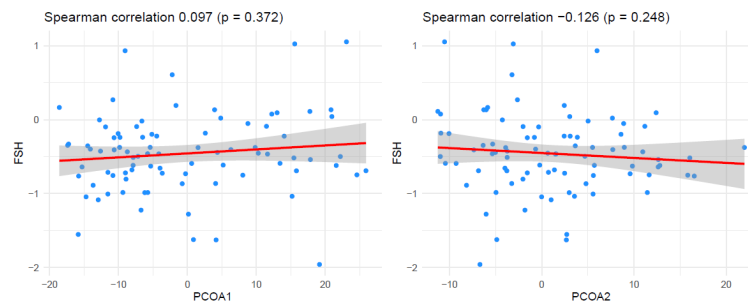

**Supplementary Figure 4: Spearman correlation between FSH and gut microbial beta diversity PCs.** Spearman correlations were calculated between circulating FSH levels and the first two principal coordinates (PCoA1 and PCoA2) of beta diversity, based on CLR-transformed species abundances. Panel A, B, C, D refer to beta-diversity calculated for phases F, O, EL and LL, respectively. Correlation coefficients ( $\rho$ ) and corresponding p-values are reported.

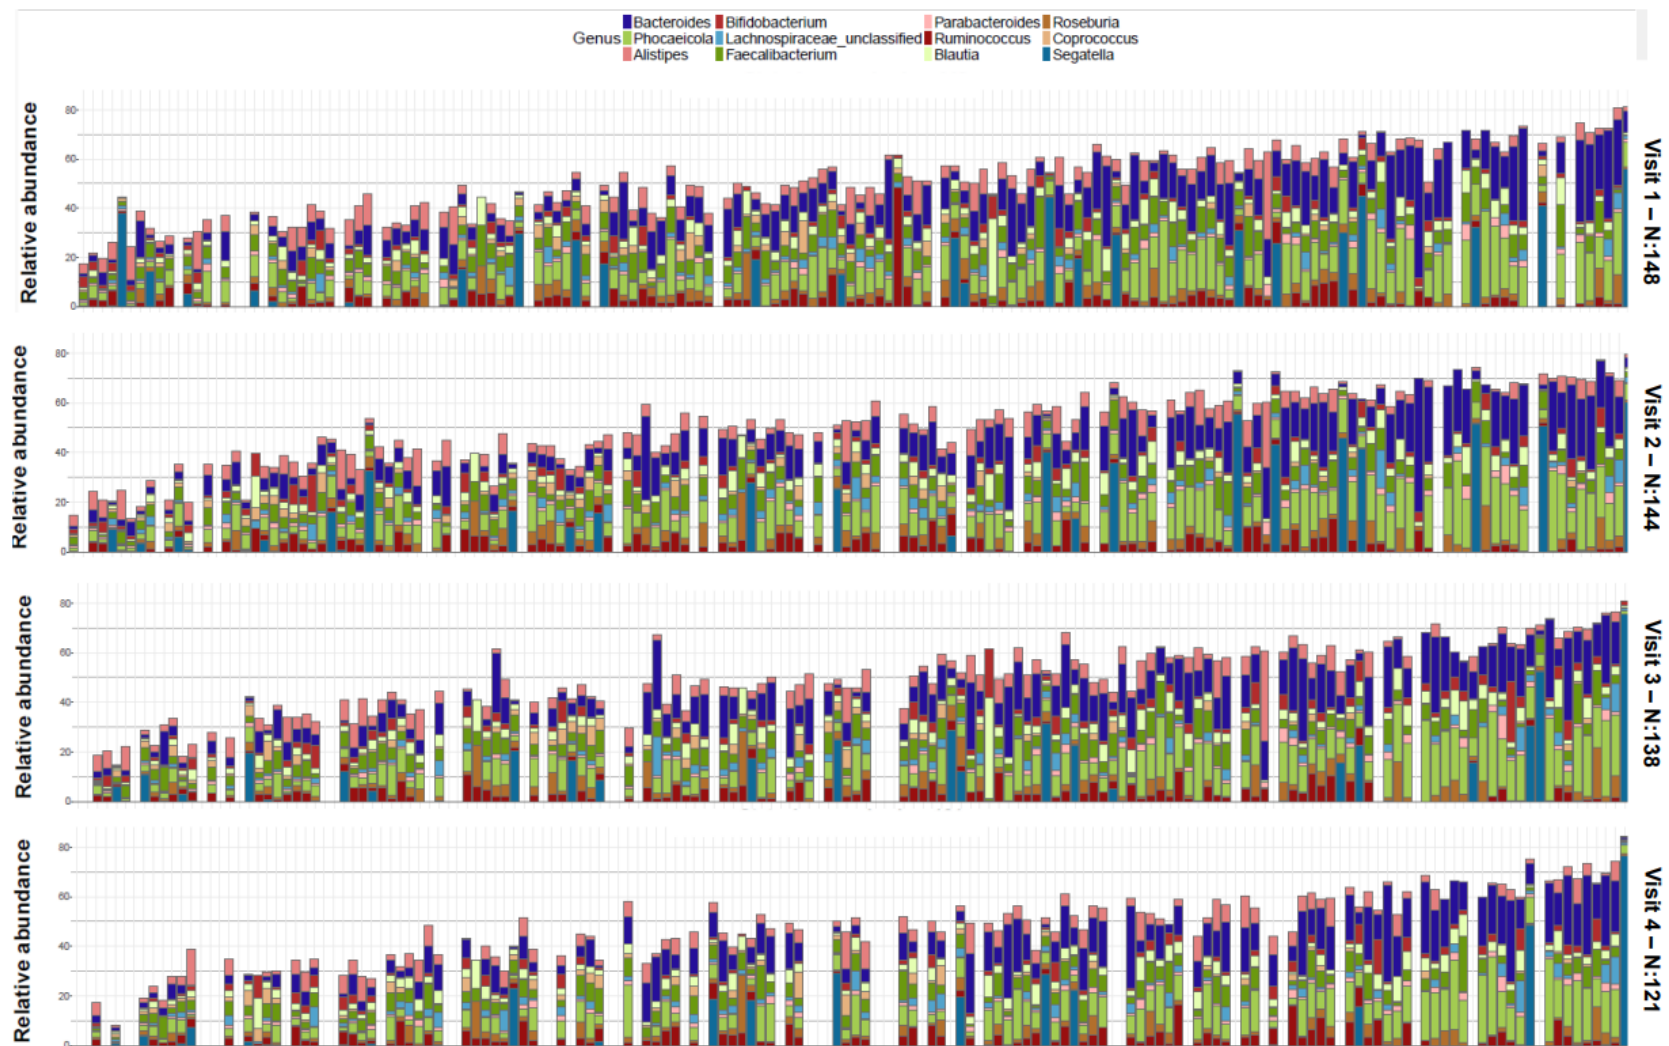

**Supplementary Figure 5: Relative abundance of the most abundant genera across visits.** The figure shows the distribution of the most prevalent gut microbial genera within each visit. Genera are represented as percentages of total community composition.

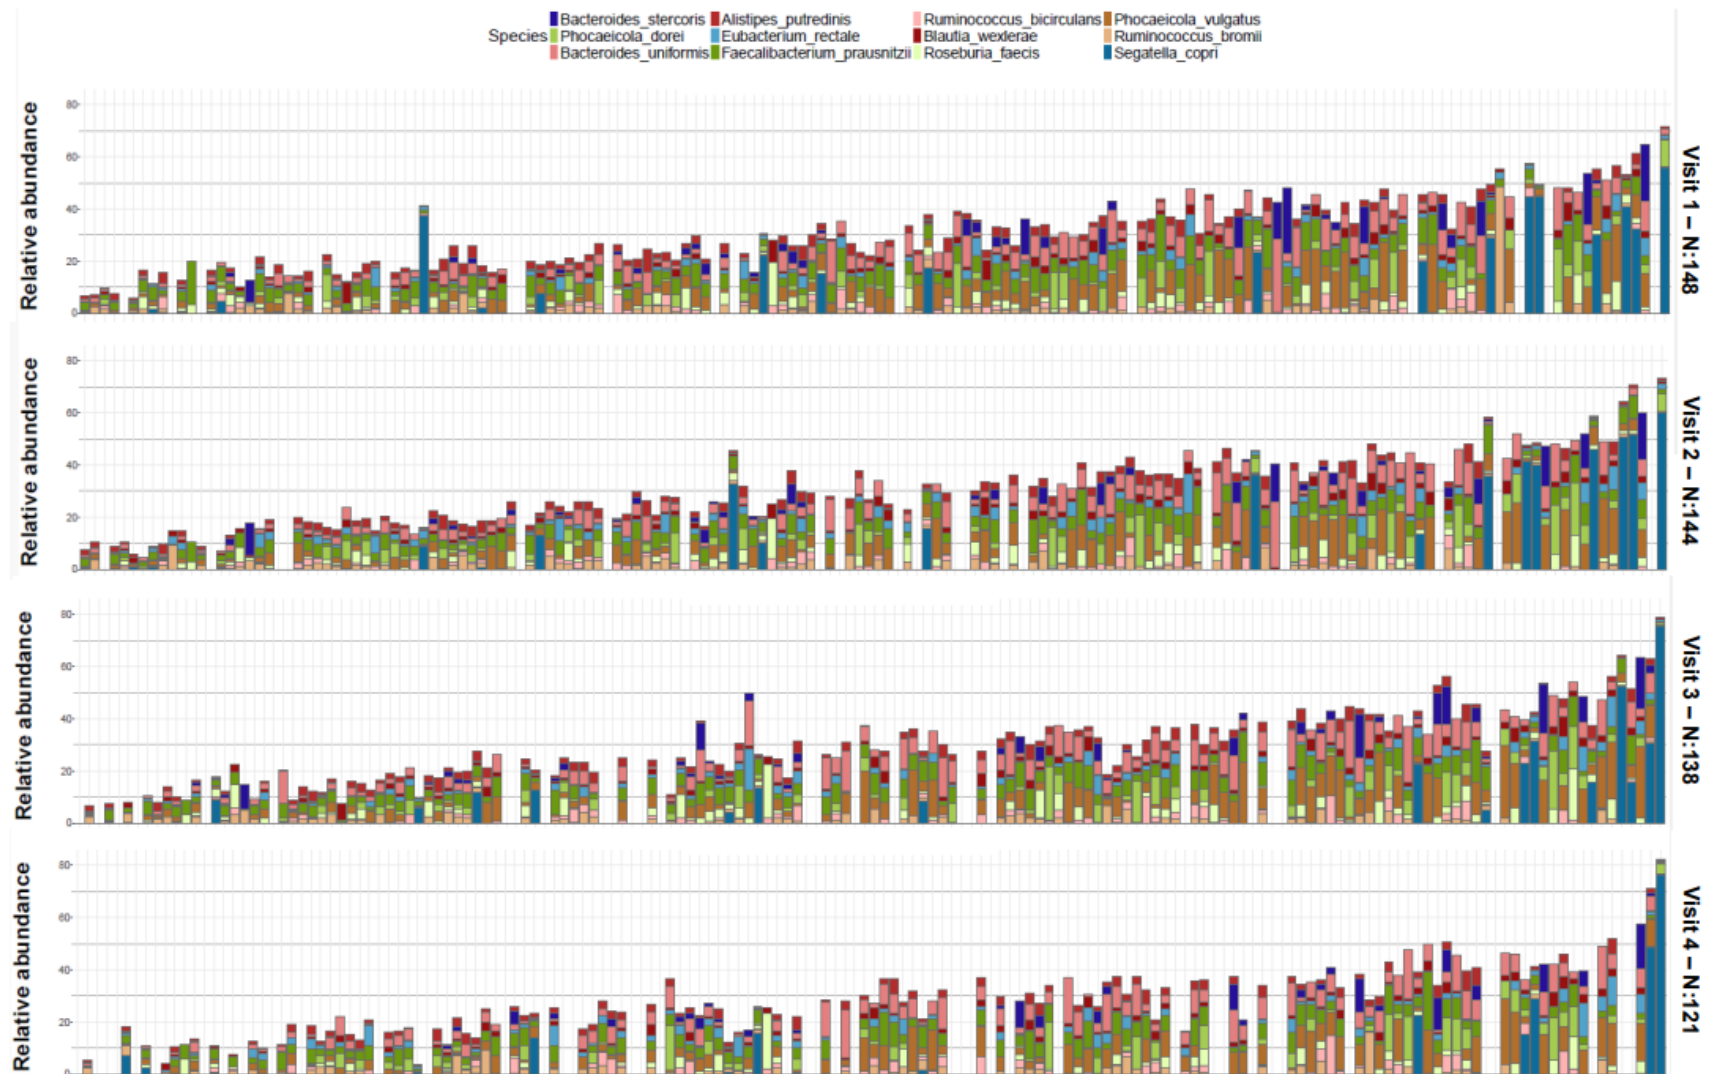

**Supplementary Figure 6. Relative abundance of the most abundant species across visits.** The figure shows the distribution of the most prevalent gut microbial species within each visit. Species are represented as percentages of total community composition.

A.

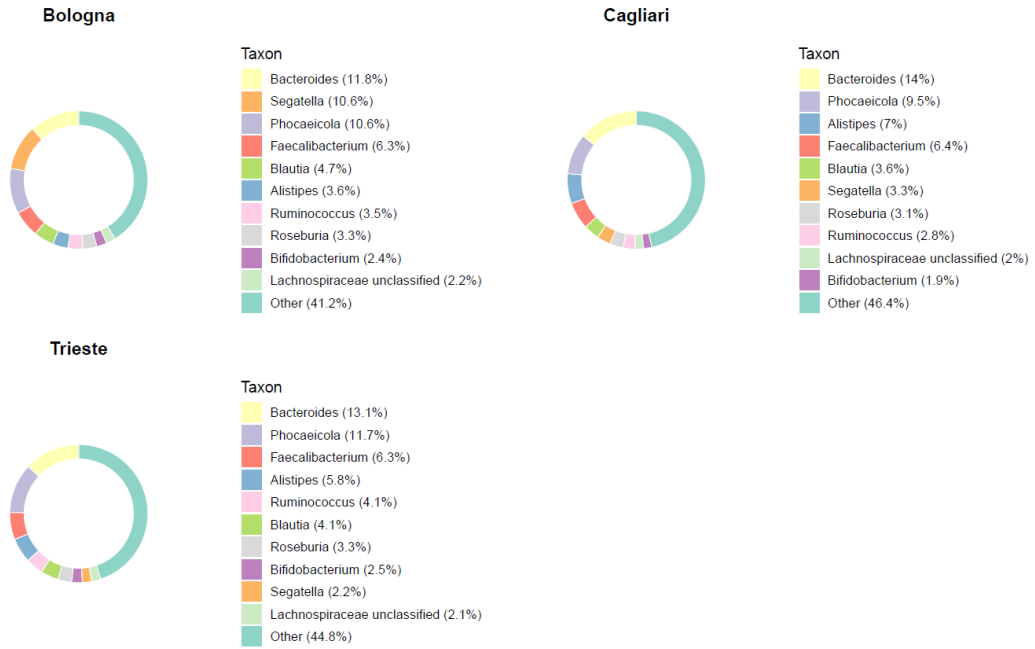

B.

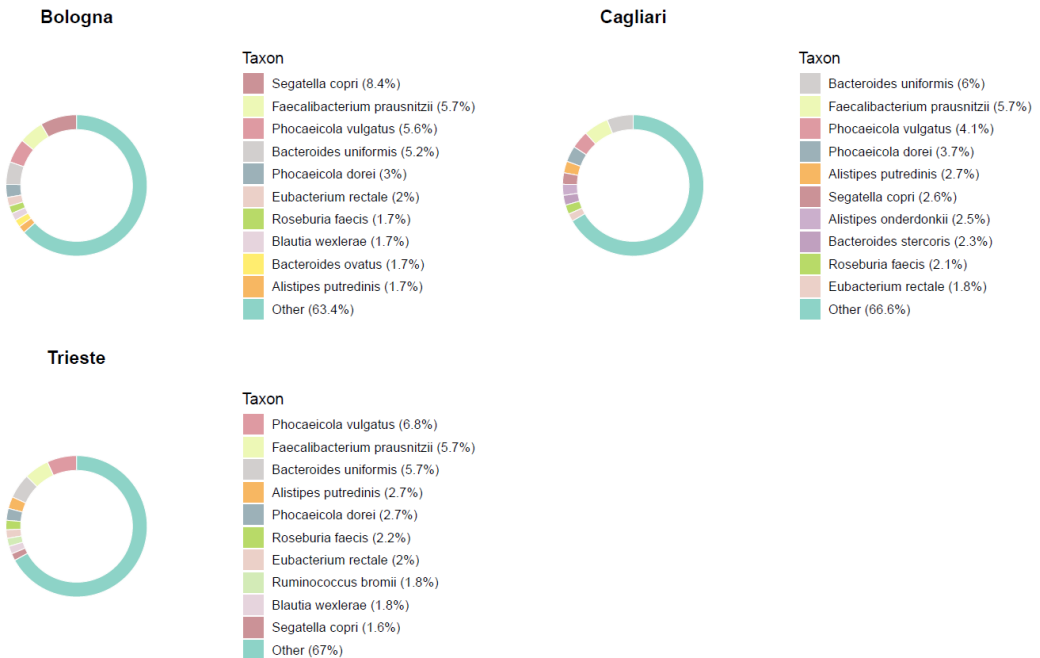

**Supplementary Figure 7. Relative abundance of dominant gut microbial taxa across cities.** Microbial species are represented as proportions (%) in circular plots. Panel A shows genus level abundances, and panel B – species level abundances.

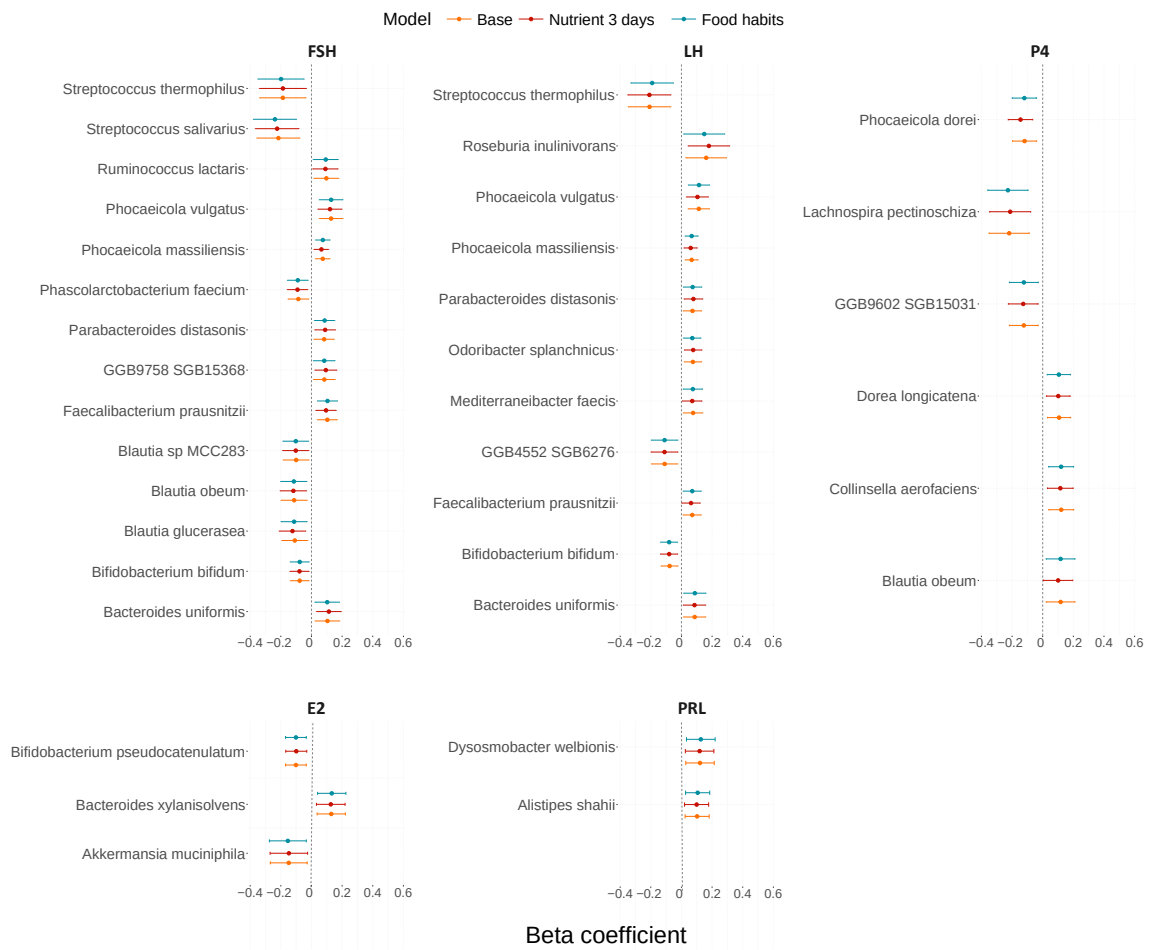

**Supplementary Figure 8: Forest plot showing associations between microbial species and sex hormone levels across models (Base, Nutrient 3-day intake, and Food habits).** Beta coefficients are presented on the x-axis and microbial species on the y-axis. The Base model (in orange) excludes dietary variables. The Food habits model (in blue) includes coffee, fruits, whole milk, yogurt, vegetables, pasta and rice, and spirits, while the Nutrient 3-day intake model (in red) includes carbohydrate, fat, sugar, cholesterol, protein, sodium, and fiber. All models were adjusted for age, BMI, Bristol Stool Scale, city of sampling, time of fecal collection, DNA concentration, reads left after quality control, and batch effect.

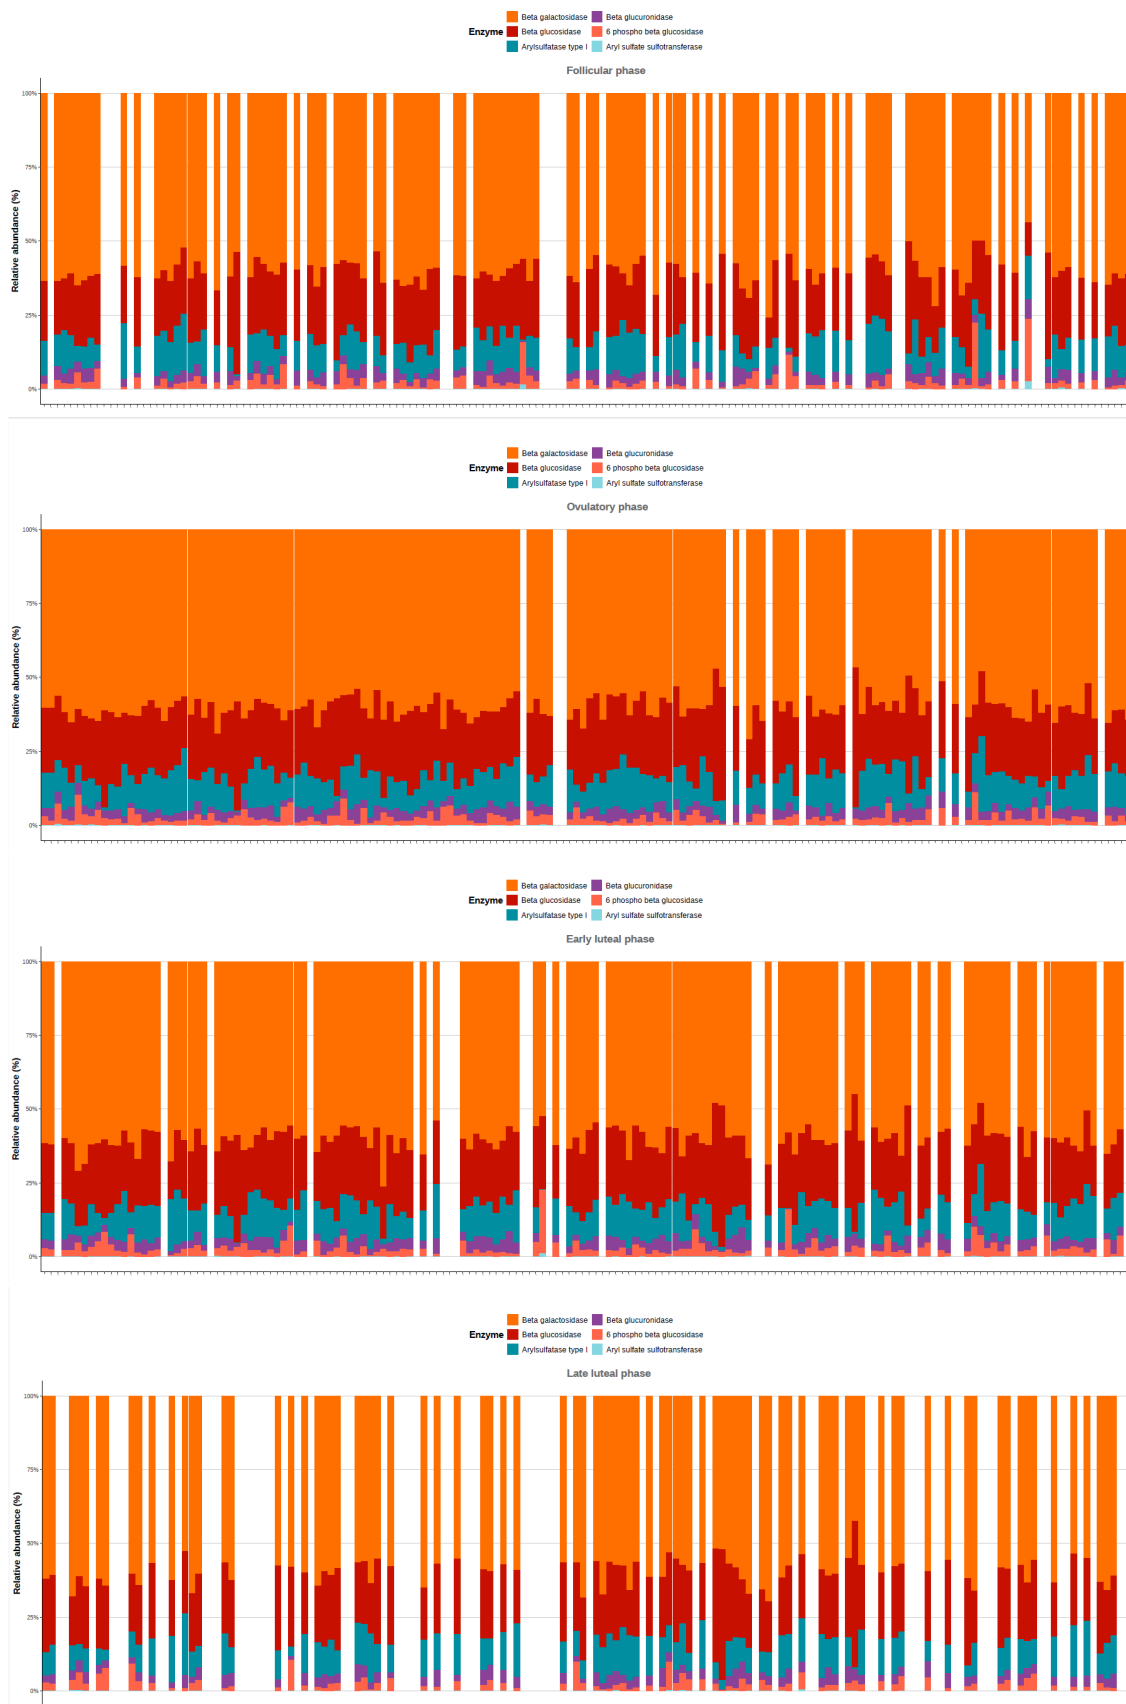

Supplementary Figure 9: Relative abundance of estrobolome enzymes across menstrual phases. The

abundances of the six estrobolome enzymes investigated in the study are shown as the relative abundance for each participant, separated by menstrual phase.

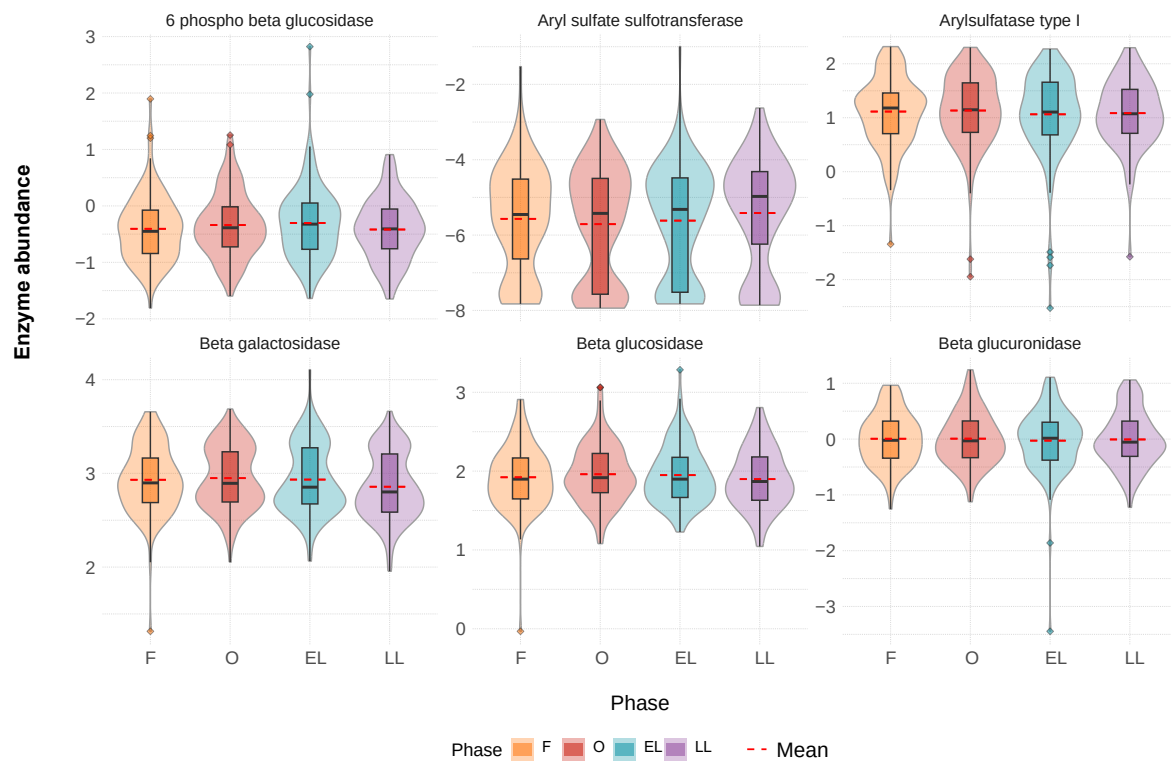

**Supplementary Figure 10. Functional gene family abundances across menstrual cycle phases.** Abundances are shown as centered log-ratio transformed values for each gene family and mean in each phase is reported.
