# Supplementary material
Source: Research Square preprint supplement (doi:10.21203/rs.3.rs-9888793/v1)
Supplement: Supplementary file 1 [file d51f45cee81c40de7861e820.xlsx]

## Sheet: SUMMARY
List of all Tables
Supplementary Table 1: Study samples descriptives
Supplementary Table 2: Average daily nutrients estimated from FFQ vs daily records concordance across the study period
Supplementary Table 3: Nutrients_3days changes across the menstrual phases
Supplementary Table 4: Associations between gut microbial species and Nutrients_3days
Supplementary Table 5: Associations between gut microbial pathways and nutrient_3days
Supplementary Table 6: Associations between habitual food intake and gut microbial species abundance
Supplementary Table 7: Associations between habitual food intake and gut microbial pathways abundance
Supplementary Table 8: Associations between dietary patterns and gut microbial species
Supplementary Table 9: Associations between dietary scores and gut microbial species
Supplementary Table 10: Alpha and beta diversity comparisons across dietary clusters
Supplementary Table 11: PERMANOVA results showing the contribution of menstrual phase, dietary, and hormons factors to gut microbiome beta diversity
Supplementary Table 12: Paired Wilcoxon signed-rank comparisons of alpha- and beta-diversity across menstrual phases
Supplementary Table 13: Association of abundance of gut microbial species and menstrual phases using paired Wilcoxon signed-rank tests
Supplementary Table 14: Differential abundance of gut microbial species across menstrual phases
Supplementary Table 15: Associations between gut microbial metabolic pathways and menstrual phase
Supplementary Table 16: Associations between gut microbial species and circulating reproductive hormone levels
Supplementary Table 17: Associations between circulating hormones and gut microbial metabolic pathways
Supplementary Table 18: Mediation analysis of the effect of diet on bacterial abundances via hormones
Supplementary Table 19: Mediation analysis of the effect of diet on microbial pathways via hormones
Supplementary Table 20: Enzymes selected for estrobolome analysis
Supplementary Table 21: Association of functional gene family abundances and menstrual phases using paired Wilcoxon signed-rank tests
Supplementary Table 22: Association between estrobolome enzymes and menstrual phases
Supplementary Table 23: Association between estrobolome enzymes and hormones

## Sheet: Table S1
Supplementary Table 1: Study Samples descriptives.
Description of basic phenotypes for all women. Mean and S.D. for quantitative phenotypes are given for visit 1 only
Variable	Unit	N or Mean (SD) or % for categorical variables
Women per center - Cagliari/Bologna/Trieste		25/38/98
Samples per center - Cagliari/Bologna/Trieste		82/119/350
Age	years	29.2 (7.08)
BMI (Body Mass index)	kg/m2	21.93 (2.9)
WHR (Waist Hip Ratio)	NA	0.76 (0.07)
Current smokers	NA	17.39 (%)
Had at least one pregnancy in the past	NA	19.25 (%)
AST (Aspartate aminotransferase)	U/L	18.12 (5.98)
ALT (Alanine aminotransferase)	U/L	15.99 (7.38)
GL (Glucose)	mg/dL	88.73 (7.3)
TRI (Triglycerides)	mg/dL	69.5 (35.2)
COL (Total cholesterol)	mg/dL	184.67 (29.02)
LDL (LDL cholesterol)(Friedman formula)	mg/dL	108.08 (24.84)
HDL (HDL cholesterol)	mg/dL	62.77 (12.42)
INS (Insulin)	mU/L	5.05 (3.18)
E2 (17 Beta Estradiol)	pg/mL	63.3 (53.51)
LH (Luteinizing Hormone)	mIU/mL	4.25 (2.61)
FSH (Follicle Stimulating Hormone)	mIU/mL	4.97 (2.7)
P4 (Progesteron)	ng/mL	0.48 (0.26)
PRL (Prolactin)	ng/mL	10.52 (7.81)

## Sheet: Table S2
Supplementary Table 2: Average daily nutrients estimated from FFQ vs daily records concordance across the study period.
Comparison of average daily energy and nutrient intakes and Spearman correlations between daily diaries and FFQs Values are presented as means with 95% confidence intervals (CI). Mean differences between daily diaries and FFQs were assessed using paired Wilcoxon rank-sum tests. To account for multiple comparisons, p-values were adjusted using the Bonferroni correction (p.adj). ns indicates not si…
Trait	Daily diaries	FFQs	Pairwise Wilcoxon rank-sum test (paired)		Speraman correlation
	Means (95% CI)	Means (95% CI)	pvalue	p.adj	ρ	pvalue	p.adj
Calories	1376.37 (1331.65-1421.09)	993.68 (950.52-1036.85)	1.29e-20	1.03513e-19	0.27	0.0007826	0.0062608
Carbohydrates	159.93 (153.57-166.28)	98.90 (93.41-104.39)	7.77e-23	6.21e-22	0.33	4.61e-05	0.0003688
Fats	49.68 (47.61-51.74)	41.28 (39.32-43.23)	3.38e-08	2.71e-07	0.25	0.0022377	0.0179016
Proteins	56.26 (54.13-58.39)	47.92 (45.49-50.36)	1.28e-08	1.02e-07	0.32	5.75e-05	0.00046
Cholesterol	74.10 (66.27-81.92)	156.24 (145.78-166.70)	4.49e-23	3.59e-22	0.41	3e-07	2.4e-06
Sodium	852.30 (796.66-907.94)	908.13 (850.66-965.60)	0.0544	0.4353	0.14	0.0791752	0.6334
Sugar	36.25 (34.06-38.43)	22.61 (20.95-24.27)	7.53e-17	6.02e-16	0.2	0.0129825	0.1039
Fiber	11.73 (10.84-12.61)	16.65 (15.80-17.51)	1.07e-15	8.59e-15	0.33	3.26e-05	0.0002608

## Sheet: Table S3
Supplementary Table 3: Nutrients_3days changes across the menstrual phases.
Linear mixed-effects models on hormonal phases (3-day windows). Results from spline-based linear mixed-effects models assessing longitudinal changes in nutrient intake across hormonal phases specified as the fixed temporal effect. Individual ID was included as a random intercept, and all models were adjusted for age, BMI, and study site. Nominal p-values, and Bonferroni-adjusted p-values are repo…
Traits	Linear model			Spline model		Spline vs. linear model
	Effect size	P-value	p.adj	P-value	p.adj	P-value
Calories	17.1778	0.0863249	1	0.0344249	0.826198	0.0577872
Carbohydrates	1.82865	0.22548	1	0.393293	1	0.467653
Fats	1.48738	0.0148789	0.357095	0.0164698	0.395274	0.114711
Proteins	1.43635	0.0281642	0.67594	0.00749791	0.17995	0.0280327
Cholesterol	4.26489	0.211962	1	0.480911	1	0.634109
Sodium	-9.06872	0.742093	1	0.332574	1	0.191851
Sugar	0.813941	0.211904	1	0.293895	1	0.34012
Fiber	0.0887962	0.705554	1	0.922462	1	0.843277

## Sheet: Table S4
Supplementary Table 4: Associations between gut microbial species and Nutrients_3days
Linear mixed-effects models were used to assess associations between gut microbial species abundance and mean of three days of dietary nutrient intake, averaged within the same hormonal phases. Models included macronutrient intake as a continuous variable and were adjusted for DNA concentration, sequencing depth, age, BMI, Bristol stool scale, study center, batch, and time of collection, with par…
Species	nutrient3days	Beta	Standard error	P-value	Q-value
Clostridium sp AM22 11AC	Carbohydrates	-0.154598	0.0487175	0.00160644	0.0598155
Brotolimicola acetigignens	Sodium	0.192189	0.0630065	0.00243577	0.0757255
Acidaminococcus intestini	Proteins	-0.0930162	0.0318654	0.00372089	0.101323
Roseburia hominis	Fiber	0.21483	0.0744824	0.00410242	0.111712
Dialister invisus	Sodium	-0.116496	0.0405349	0.00428172	0.114395
Bacteroides finegoldii	Fiber	-0.097487	0.0345201	0.00498927	0.121807
Acidaminococcus intestini	Calories	-0.102011	0.0367074	0.00569849	0.13228
Mediterraneibacter faecis	Sugar	-0.115902	0.0415403	0.00552021	0.134769
Clostridium sp AM22 11AC	Calories	-0.133953	0.0484413	0.0059127	0.135038
Bifidobacterium bifidum	Fats	0.100881	0.0371696	0.00693133	0.158303
Gemmiger formicilis	Sugar	-0.120545	0.0450578	0.00777536	0.159564
Bacteroides finegoldii	Carbohydrates	-0.107322	0.0405784	0.00847554	0.167647
Acidaminococcus intestini	Sugar	-0.0832884	0.0325161	0.0108101	0.182629
Clostridium sp AM22 11AC	Sugar	-0.1115	0.0443129	0.0122234	0.196685
GGB9342 SGB14306	Fats	0.159904	0.0630991	0.0116029	0.197949
Phascolarctobacterium faecium	Sugar	-0.101056	0.0404545	0.0129129	0.202303
GGB9758 SGB15368	Fats	0.108544	0.043483	0.0129871	0.204331
GGB3486 SGB4658	Fiber	0.123453	0.0486928	0.0115559	0.204376
Acidaminococcus intestini	Carbohydrates	-0.0921786	0.0369971	0.01311	0.206061
GGB3486 SGB4658	Fats	0.122066	0.0496796	0.0143753	0.21101
Anaerobutyricum hallii	Fiber	-0.105982	0.042737	0.0135366	0.213692
Alistipes shahii	Cholesterol	-0.0761338	0.0312902	0.0154699	0.221267
Bacteroides stercoris	Fiber	-0.072725	0.0303844	0.0172413	0.232741
GGB9342 SGB14306	Calories	0.161913	0.068046	0.0177342	0.234688
Oscillospiraceae bacterium CLA AA H250	Cholesterol	-0.0986176	0.0415067	0.0179962	0.235951
Acidaminococcus intestini	Sodium	-0.0623582	0.0265128	0.0192207	0.240552
GGB9758 SGB15368	Calories	0.112875	0.0487577	0.0211257	0.251378
Parasutterella SGB9260	Proteins	-0.0911139	0.0393797	0.0211776	0.258513
Phocaeicola dorei	Sugar	-0.101466	0.0445585	0.0233799	0.264847
Phocaeicola massiliensis	Sugar	-0.0663963	0.0293651	0.0243903	0.266931
GGB3345 SGB4425	Carbohydrates	0.100528	0.044352	0.0238858	0.268257
Flavonifractor plautii	Proteins	-0.142444	0.0624376	0.0229865	0.268999
Clostridiales bacterium KLE1615	Carbohydrates	0.121239	0.0541434	0.0256129	0.275255
Lacrimispora amygdalina	Fiber	0.126548	0.056864	0.026525	0.276172
Dorea formicigenerans	Carbohydrates	-0.0873348	0.0392048	0.0263747	0.278386
Lachnospira eligens	Fats	0.142265	0.0645975	0.0281557	0.280764
Phocaeicola vulgatus	Sugar	-0.104243	0.0475273	0.028927	0.286302
GGB3175 SGB4191	Sugar	0.113245	0.0520724	0.0301981	0.286302
Flavonifractor plautii	Fats	-0.138928	0.0638411	0.030047	0.291415
Mediterraneibacter faecis	Carbohydrates	-0.100319	0.0468755	0.0328954	0.308476
Bacteroides caccae	Sugar	-0.095337	0.045102	0.0351525	0.30889
Coprococcus catus	Calories	0.0794362	0.0370401	0.0324949	0.310604
Clostridium sp AM22 11AC	Proteins	-0.0932881	0.0435833	0.032875	0.314698
Clostridiaceae bacterium	Fiber	0.113621	0.0535455	0.0343631	0.318028
Odoribacter splanchnicus	Sodium	0.064934	0.030583	0.0343676	0.326933
Ruminococcus gnavus	Cholesterol	0.101721	0.0491655	0.0391916	0.340462
Coprococcus eutactus	Fiber	0.121007	0.0584538	0.0391123	0.342965
Lachnospira eligens	Calories	0.144911	0.0702301	0.0396287	0.346385
Bacteroides fragilis	Cholesterol	-0.119906	0.0583792	0.0406456	0.346712
Ruminococcus lactaris	Sugar	-0.0966534	0.0478512	0.0440233	0.354188
GGB9342 SGB14306	Proteins	0.126388	0.0617749	0.0413442	0.356825
Alistipes ihumii	Fats	-0.100169	0.049053	0.0417072	0.357659
Mediterraneibacter faecis	Fiber	-0.081905	0.0402062	0.0423027	0.358686
Coprococcus eutactus	Proteins	0.121617	0.0597008	0.0423167	0.360966
Candidatus Cibionibacter quicibialis	Carbohydrates	0.109821	0.0541989	0.0433456	0.361043
Acidaminococcus intestini	Fats	-0.0671225	0.03315	0.0435698	0.367162
Odoribacter splanchnicus	Cholesterol	-0.0594271	0.0297052	0.046162	0.373516
Dorea longicatena	Sodium	-0.0677709	0.0340543	0.0473375	0.389709
Dysosmobacter welbionis	Sugar	-0.0898461	0.0474292	0.0588096	0.410175
Phascolarctobacterium faecium	Carbohydrates	-0.0876932	0.0462602	0.0586992	0.414135
Alistipes onderdonkii	Sodium	0.0769506	0.0405148	0.0583341	0.414211
Coprococcus comes	Sugar	-0.0722486	0.0387258	0.0628014	0.415067
Coprococcus catus	Proteins	0.0641191	0.0336637	0.0574555	0.417215
Anaerostipes hadrus	Cholesterol	0.0627689	0.0332804	0.060009	0.425246
Blautia sp MCC283	Proteins	0.0932959	0.0493138	0.0592476	0.425861
Blautia SGB4815	Calories	0.0883585	0.0468895	0.0601423	0.427056
Oscillospiraceae bacterium CLA AA H250	Sodium	-0.0795167	0.0428679	0.0643406	0.429825
Bacteroides faecis	Fats	-0.0695981	0.0376243	0.0651334	0.430992
Bacteroides uniformis	Cholesterol	-0.0709409	0.0379832	0.0626033	0.432198
Fusicatenibacter saccharivorans	Cholesterol	0.0732198	0.0392405	0.0627976	0.432198
Flavonifractor plautii	Calories	-0.127964	0.068629	0.0628619	0.434207
Eubacterium rectale	Fiber	-0.119395	0.0639456	0.0625943	0.436205
Clostridiaceae bacterium	Fats	0.100697	0.0549854	0.0676824	0.437339
Blautia obeum	Fiber	-0.0904622	0.0486633	0.0637506	0.437565
Oscillospiraceae bacterium	Fats	-0.105872	0.0582199	0.0696422	0.442213
GGB1420 SGB1957	Sodium	0.0580112	0.0317508	0.0684918	0.442715
GGB33469 SGB15236	Sugar	-0.0715166	0.0406617	0.0793491	0.447643
Parasutterella SGB9260	Calories	-0.0812261	0.0446164	0.069341	0.450399
Faecalibacterium prausnitzii	Sugar	-0.0681786	0.0388978	0.0804102	0.451829
Clostridium fessum	Proteins	-0.0672015	0.0366874	0.0676888	0.453793
GGB6606 SGB9340	Fiber	0.0795012	0.0436596	0.0693181	0.454498
Eubacterium rectale	Sugar	-0.115592	0.0663188	0.0820734	0.454531
Dialister invisus	Calories	-0.0978669	0.054516	0.073283	0.457391
GGB51647 SGB4348	Carbohydrates	0.127119	0.0704532	0.0718562	0.460917
Parabacteroides merdae	Fiber	-0.0583923	0.0325717	0.0738652	0.462966
GGB9708 SGB15234	Fiber	0.0763736	0.0423494	0.0721121	0.462966
GGB9342 SGB14306	Fiber	0.109482	0.0610092	0.0734131	0.462966
Anaerobutyricum soehngenii	Cholesterol	0.0904622	0.0512743	0.0785134	0.465604
Dysosmobacter welbionis	Proteins	-0.0826886	0.0465369	0.0762567	0.465645
Faecalibacterium sp HTFF	Proteins	0.0746438	0.0419875	0.0761935	0.465645
Alistipes ihumii	Calories	-0.0922485	0.0526116	0.0801864	0.468481
Brotolimicola acetigignens	Calories	0.141995	0.0812829	0.0813021	0.470122
Brotolimicola acetigignens	Fats	0.132892	0.0756648	0.0796947	0.470199
Bacteroides clarus	Fats	0.0596318	0.0339011	0.0793918	0.470199
Eubacterium siraeum	Carbohydrates	-0.129662	0.0732351	0.0772919	0.472273
Bifidobacterium bifidum	Calories	0.0711965	0.0412968	0.0854161	0.480447
Roseburia hominis	Fats	0.131507	0.0767804	0.0874141	0.480643
Dorea formicigenerans	Calories	-0.0665877	0.0389423	0.0879406	0.480984
Dialister invisus	Sugar	-0.0836301	0.0492764	0.0904126	0.483667
Brotolimicola acetigignens	Fiber	0.12624	0.0728122	0.0836496	0.48594
Parabacteroides distasonis	Fiber	-0.0661996	0.0380363	0.0825477	0.48594
Roseburia faecis	Sugar	0.125439	0.0742593	0.0919142	0.487455
Dorea longicatena	Cholesterol	0.0560368	0.0328833	0.0892495	0.493661
Phocaeicola vulgatus	Carbohydrates	-0.0925661	0.0548901	0.0925354	0.498214
GGB9708 SGB15234	Cholesterol	-0.0587697	0.0347335	0.0915345	0.498511
Dysosmobacter welbionis	Fiber	-0.0768812	0.0459519	0.0950009	0.506757
Clostridium sp AF36 4	Fiber	0.0874332	0.0532277	0.101215	0.51004
GGB3304 SGB4367	Fiber	-0.0744281	0.0459471	0.106061	0.514321
Bacteroides xylanisolvens	Proteins	-0.0995538	0.0605998	0.101151	0.52465
GGB3175 SGB4191	Fiber	0.0802859	0.0503239	0.111382	0.525725
Bacteroides thetaiotaomicron	Fiber	0.0845865	0.0531999	0.11265	0.528185
Agathobaculum butyriciproducens	Fiber	0.0698787	0.0440507	0.113337	0.529652
Clostridiaceae bacterium	Proteins	0.0876119	0.0541996	0.106662	0.531061
Bacteroides finegoldii	Calories	-0.0652457	0.0405356	0.10822	0.531263
Bacteroides eggerthii	Sodium	0.0401105	0.0244579	0.101956	0.533551
Dysosmobacter welbionis	Cholesterol	-0.0620874	0.0390966	0.11307	0.534373
Brotolimicola acetigignens	Proteins	0.117449	0.0740062	0.113206	0.542301
Oscillospiraceae bacterium	Calories	-0.0982116	0.0627925	0.118472	0.547076
Dysosmobacter welbionis	Calories	-0.0793081	0.0509593	0.120308	0.547076
Wujia chipingensis	Carbohydrates	0.0848696	0.0536927	0.114627	0.55021
Coprococcus eutactus	Cholesterol	0.0741129	0.047911	0.122798	0.553764
Bilophila wadsworthia	Cholesterol	-0.0586824	0.038053	0.123893	0.554572
Dorea formicigenerans	Fiber	-0.0536242	0.0347818	0.123856	0.554999
Ruminococcus gnavus	Proteins	0.09087	0.0584189	0.120517	0.555869
Parasutterella SGB9260	Fats	-0.063262	0.0407324	0.121147	0.558777
Agathobaculum butyriciproducens	Fats	0.068149	0.0451405	0.131792	0.568954
Dysosmobacter welbionis	Carbohydrates	-0.0790476	0.0514356	0.125007	0.569165
Anaerobutyricum hallii	Sodium	-0.0563598	0.0368662	0.127144	0.571444
GGB9758 SGB15368	Carbohydrates	0.0752165	0.0492286	0.127344	0.572442
Barnesiella intestinihominis	Cholesterol	-0.0430563	0.0286283	0.133522	0.574672
Oscillospiraceae bacterium	Cholesterol	-0.0711371	0.0474097	0.134308	0.576303
Blautia massiliensis	Cholesterol	0.0541864	0.0361475	0.134755	0.576473
Bacteroides faecis	Calories	-0.063565	0.0420958	0.131836	0.577957
Blautia SGB4815	Proteins	0.0613508	0.0418134	0.143054	0.586886
GGB3175 SGB4191	Fats	0.0772698	0.0526906	0.143234	0.587883
Eubacterium siraeum	Calories	-0.106341	0.0726451	0.143903	0.588508
Fusicatenibacter saccharivorans	Sugar	-0.0708805	0.0478208	0.138983	0.592358
Blautia wexlerae	Sugar	-0.0558097	0.0379366	0.141995	0.596634
Bifidobacterium pseudocatenulatum	Fiber	0.0626094	0.0436795	0.152496	0.603167
Oscillibacter sp ER4	Sodium	0.0626239	0.043199	0.147992	0.603908
Simiaoa sunii	Proteins	0.111219	0.0774695	0.151801	0.607203
Clostridium sp AM22 11AC	Fiber	-0.0612254	0.0429686	0.154922	0.608494
Phocaeicola massiliensis	Cholesterol	0.0321136	0.0225794	0.155908	0.609966
Blautia SGB4815	Fats	0.0620951	0.0430303	0.149727	0.610042
Dialister invisus	Fats	-0.0718451	0.0499675	0.151206	0.610042
Parabacteroides merdae	Sugar	-0.0487404	0.0340226	0.152839	0.611433
Anaerobutyricum hallii	Sugar	-0.0634158	0.0444537	0.154443	0.611433
Ruminococcus gnavus	Sugar	-0.0850293	0.0595463	0.153984	0.611433
Mediterraneibacter faecis	Sodium	-0.0491997	0.0343774	0.153227	0.613267
Bacteroides xylanisolvens	Fiber	-0.0833496	0.0596099	0.16277	0.621562
Coprococcus comes	Proteins	0.0538534	0.0381792	0.159128	0.621851
Ruminococcus callidus	Fiber	0.0521134	0.037462	0.164976	0.622949
Anaerostipes hadrus	Carbohydrates	0.0625908	0.0435956	0.151748	0.626459
Acidaminococcus intestini	Fiber	-0.0431388	0.0314021	0.170345	0.63476
GGB9342 SGB14306	Carbohydrates	0.0972325	0.0689264	0.159001	0.634861
Phocaeicola dorei	Cholesterol	-0.0472321	0.0345962	0.173103	0.635943
Roseburia intestinalis	Cholesterol	0.0862368	0.0628311	0.170655	0.635943
GGB3345 SGB4425	Fiber	0.0516177	0.0384104	0.179747	0.644879
Bilophila wadsworthia	Fiber	-0.0598788	0.0456915	0.190739	0.646191
Coprococcus comes	Fats	0.052965	0.0393235	0.178725	0.647251
Bacteroides uniformis	Fats	0.0646088	0.0480638	0.179583	0.648383
Dorea formicigenerans	Sugar	-0.0481657	0.0359723	0.181262	0.649745
GGB4552 SGB6276	Cholesterol	-0.0594205	0.0448432	0.185903	0.651581
Bacteroides stercoris	Cholesterol	-0.0322957	0.0244885	0.18816	0.653491
Bifidobacterium adolescentis	Proteins	-0.0766091	0.0585715	0.19163	0.653912
Sutterella wadsworthensis	Proteins	0.0420384	0.0320287	0.190205	0.653912
Alistipes communis	Proteins	-0.0613668	0.046549	0.188096	0.653912
Roseburia intestinalis	Proteins	-0.0974843	0.0738751	0.187623	0.653912
Phocaeicola massiliensis	Proteins	0.0389515	0.028879	0.178312	0.653912
Phocaeicola vulgatus	Calories	-0.0731793	0.0546623	0.181441	0.655585
Parabacteroides distasonis	Carbohydrates	-0.0589762	0.04421	0.182882	0.656809
Roseburia hominis	Carbohydrates	0.110614	0.081894	0.177473	0.656809
Blautia SGB4815	Carbohydrates	0.0635985	0.0473488	0.179875	0.656809
Alistipes finegoldii	Carbohydrates	0.0813052	0.0605335	0.179913	0.656809
Ruminococcus bromii	Carbohydrates	0.0949739	0.0699458	0.175233	0.656809
GGB9758 SGB15368	Sugar	0.0564604	0.0429538	0.189528	0.657736
Clostridiaceae bacterium	Calories	0.0773573	0.0581512	0.184102	0.658305
Eubacterium ventriosum	Proteins	-0.0638542	0.0491464	0.194488	0.65884
Ruminococcus gnavus	Fiber	-0.0740081	0.0577186	0.200417	0.659979
Faecalibacterium SGB15346	Proteins	-0.0550815	0.0426799	0.197619	0.662205
Bacteroides uniformis	Sugar	-0.0606822	0.047511	0.202233	0.662394
Anaerobutyricum soehngenii	Sugar	-0.0817033	0.0638514	0.201392	0.662394
Bacteroides stercoris	Calories	-0.0489148	0.0370779	0.187946	0.662688
Alistipes communis	Cholesterol	-0.049474	0.0382892	0.197114	0.663273
GGB1420 SGB1957	Carbohydrates	0.0563569	0.043324	0.193992	0.665115
Alistipes finegoldii	Calories	0.0787342	0.0600944	0.190811	0.665489
Lachnospira pectinoschiza	Fats	0.0895758	0.0688608	0.193958	0.666819
Alistipes communis	Sodium	0.052233	0.0394996	0.186821	0.667179
GGB9715 SGB15265	Proteins	0.0553063	0.0430634	0.199781	0.667192
Brotolimicola acetigignens	Sugar	0.0937951	0.0754265	0.214317	0.670954
Clostridiales bacterium KLE1615	Sugar	0.0631511	0.0505192	0.211912	0.670954
Mediterraneibacter faecis	Calories	-0.0598961	0.0466877	0.200195	0.671339
GGB51647 SGB4348	Calories	0.0895743	0.0700449	0.201624	0.671339
Clostridium fessum	Fiber	-0.045423	0.0361625	0.209787	0.672077
Faecalibacillus intestinalis	Fiber	-0.0600311	0.0478708	0.210497	0.672831
Blautia faecis	Proteins	0.0474745	0.0387232	0.220863	0.674003
Alistipes finegoldii	Proteins	0.0643966	0.0530213	0.225248	0.674003
Ruminococcus bromii	Proteins	-0.0750423	0.060928	0.218815	0.674003
GGB9708 SGB15234	Proteins	0.0517758	0.0433417	0.232974	0.675096
Clostridiaceae bacterium	Sugar	0.0678232	0.0552902	0.220556	0.675725
Lachnospira eligens	Sugar	0.0781568	0.0643696	0.225341	0.676316
Bifidobacterium adolescentis	Cholesterol	0.0588723	0.0473833	0.214877	0.676431
Lachnospira eligens	Proteins	0.0739916	0.0631766	0.242169	0.677691
Roseburia intestinalis	Sugar	0.0902646	0.075333	0.231444	0.678866
GGB1420 SGB1957	Calories	0.0518201	0.0430154	0.228961	0.682644
Roseburia hominis	Calories	0.100987	0.0811292	0.21387	0.682644
Coprococcus comes	Calories	0.0539652	0.0430507	0.210659	0.682644
Wujia chipingensis	Calories	0.064313	0.0532596	0.227831	0.682644
GGB3345 SGB4425	Calories	0.0532717	0.0441952	0.228685	0.682644
Parasutterella SGB9260	Cholesterol	-0.0393149	0.0320824	0.221215	0.685427
Alistipes shahii	Fats	-0.0496058	0.040658	0.223158	0.68726
GGB1420 SGB1957	Fats	0.0472145	0.0391664	0.228698	0.68726
Blautia obeum	Proteins	0.0574794	0.0497542	0.248638	0.688986
Roseburia faecis	Cholesterol	0.0717328	0.0597848	0.230965	0.689821
Parasutterella excrementihominis	Cholesterol	-0.0429465	0.0363756	0.238543	0.689821
GGB4571 SGB6317	Cholesterol	-0.0422995	0.0359815	0.240542	0.689821
Ruminococcus bicirculans	Carbohydrates	-0.110807	0.0900441	0.219092	0.690322
Clostridiaceae bacterium	Carbohydrates	0.0721175	0.0587618	0.220357	0.690322
Anaerobutyricum hallii	Carbohydrates	-0.0606307	0.0493714	0.220054	0.690322
Flavonifractor plautii	Carbohydrates	-0.08596	0.0694052	0.216138	0.690322
Bacteroides faecis	Cholesterol	0.0335119	0.0288508	0.246243	0.690891
GGB4571 SGB6317	Carbohydrates	0.0622614	0.0508586	0.221525	0.691193
Dorea formicigenerans	Sodium	-0.0378428	0.0302464	0.211604	0.693591
Oscillospiraceae bacterium	Proteins	-0.0651341	0.0569621	0.253456	0.695531
Faecalicatena fissicatena	Proteins	0.0531262	0.0465281	0.254172	0.696146
Bifidobacterium longum	Carbohydrates	0.0669429	0.0557714	0.230638	0.69634
Ruminococcus SGB4421	Calories	-0.054507	0.0464897	0.241655	0.696911
GGB6606 SGB9340	Sugar	0.0520828	0.0453667	0.251584	0.697149
Ruminococcus SGB4421	Cholesterol	0.0372076	0.0328054	0.257483	0.698163
Coprococcus catus	Fats	0.0402343	0.0345184	0.244384	0.699446
Bifidobacterium longum	Calories	0.0639114	0.0553266	0.248622	0.701256
Candidatus Cibionibacter quicibialis	Calories	0.0615679	0.0539785	0.254658	0.702818
Sutterella wadsworthensis	Sodium	0.0320645	0.0262688	0.223077	0.703511
Bacteroides cellulosilyticus	Carbohydrates	0.0710219	0.0609751	0.244745	0.704147
Alistipes putredinis	Sodium	0.0444616	0.0365838	0.225086	0.705136
Blautia massiliensis	Fiber	-0.0517181	0.0441111	0.241728	0.706857
Simiaoa sunii	Fiber	-0.090162	0.0762716	0.237799	0.706857
GGB51647 SGB4348	Sugar	0.0702645	0.0629787	0.265213	0.707449
Bifidobacterium bifidum	Cholesterol	0.0325683	0.029229	0.265934	0.707824
GGB3345 SGB4425	Cholesterol	-0.035313	0.0318793	0.268719	0.709901
Lachnospira eligens	Carbohydrates	0.081237	0.0710485	0.253459	0.710103
Alistipes onderdonkii	Fats	0.0578085	0.0507196	0.255083	0.712334
Mediterraneibacter faecis	Fats	-0.0483452	0.0424381	0.255281	0.712334
Alistipes shahii	Proteins	-0.0425783	0.0392946	0.279231	0.713158
GGB3345 SGB4425	Sodium	0.0389811	0.0329957	0.238188	0.713768
GGB4552 SGB6276	Fats	-0.061173	0.054264	0.260183	0.714114
Faecalicatena fissicatena	Sugar	-0.0518957	0.0473514	0.273711	0.714135
Bifidobacterium bifidum	Proteins	0.0391054	0.0363157	0.28222	0.71489
Faecalibacterium prausnitzii	Fiber	-0.0422552	0.0375987	0.261763	0.715589
Collinsella aerofaciens	Fiber	-0.0471981	0.0427418	0.270134	0.715916
GGB9758 SGB15368	Fiber	0.0454112	0.0412139	0.271274	0.715916
Eubacterium siraeum	Sodium	-0.066094	0.0568709	0.24584	0.716273
Blautia glucerasea	Sugar	-0.0542669	0.0497514	0.275975	0.716277
Coprococcus catus	Sodium	0.0333365	0.028869	0.248872	0.716394
Akkermansia muciniphila	Carbohydrates	0.0938313	0.0842171	0.265781	0.716765
Faecalibacterium prausnitzii	Calories	-0.047949	0.0435315	0.271289	0.717066
Oscillibacter sp MSJ 31	Calories	0.056535	0.050958	0.267846	0.717066
GGB3486 SGB4658	Calories	0.058306	0.0524085	0.266528	0.717066
Bifidobacterium pseudocatenulatum	Sugar	0.0492542	0.0452879	0.277397	0.718087
GGB1420 SGB1957	Cholesterol	-0.0336986	0.0308159	0.274887	0.719483
Flavonifractor plautii	Sodium	-0.0609969	0.0538668	0.258141	0.719485
Ruminococcus bromii	Sodium	0.0573677	0.0508129	0.259645	0.719485
GGB3486 SGB4658	Sodium	-0.0492883	0.0437871	0.260917	0.719703
Bacteroides faecis	Sugar	-0.0401818	0.0370271	0.278551	0.71976
Wujia chipingensis	Proteins	0.051724	0.0485139	0.286914	0.720338
GGB9602 SGB15031	Calories	0.0610919	0.0557735	0.273931	0.720689
GGB3345 SGB4425	Proteins	0.0417145	0.0392087	0.287989	0.721756
Anaerobutyricum hallii	Calories	-0.0530757	0.0489878	0.279175	0.722691
Odoribacter splanchnicus	Carbohydrates	-0.0448461	0.0407477	0.271647	0.72303
Faecalicatena fissicatena	Cholesterol	0.0414066	0.0381646	0.278649	0.723464
Clostridium sp AM49 4BH	Cholesterol	-0.0541317	0.0509272	0.288453	0.723552
Alistipes ihumii	Cholesterol	-0.0430874	0.0404361	0.28727	0.723552
Bacteroides ovatus	Cholesterol	-0.0430209	0.0400938	0.284009	0.723552
Akkermansia muciniphila	Cholesterol	-0.0689842	0.0647031	0.286991	0.723552
Faecalicatena fissicatena	Sodium	-0.0438496	0.0393739	0.266112	0.723958
Oscillibacter sp ER4	Sugar	-0.0560574	0.0523773	0.285133	0.724862
Blautia faecis	Sodium	0.0364197	0.0328432	0.268155	0.725559
Bifidobacterium longum	Fiber	0.0514709	0.0484285	0.288481	0.725943
Clostridium sp AF36 4	Sugar	-0.0587243	0.0551049	0.287178	0.727448
Alistipes onderdonkii	Proteins	0.0515689	0.0489823	0.293098	0.728117
Eubacterium siraeum	Cholesterol	-0.0577127	0.0554433	0.298547	0.729445
Faecalibacterium prausnitzii	Fats	-0.0425843	0.0395447	0.282171	0.730892
Alistipes finegoldii	Fats	0.0602297	0.0546963	0.27146	0.730892
Bacteroides finegoldii	Fats	-0.0397459	0.0366984	0.27944	0.730892
Ruminococcus bicirculans	Sodium	0.0768547	0.0698348	0.271752	0.73139
Oscillibacter sp MSJ 31	Carbohydrates	0.0555084	0.0513241	0.28006	0.734453
Dorea formicigenerans	Proteins	-0.0364783	0.0353375	0.302497	0.73946
Bacteroides stercoris	Fats	-0.034221	0.0327009	0.296083	0.741466
GGB6606 SGB9340	Fats	-0.0478624	0.0456999	0.295521	0.741466
Streptococcus salivarius	Fats	-0.0804862	0.0769357	0.296037	0.741466
Alistipes putredinis	Sugar	-0.0466096	0.0453723	0.305001	0.744622
Bacteroides clarus	Cholesterol	0.0262157	0.0260361	0.314699	0.745175
Phascolarctobacterium faecium	Cholesterol	-0.0322135	0.032149	0.31704	0.745312
Roseburia hominis	Sugar	0.0790756	0.0772122	0.306297	0.7465
Eubacterium siraeum	Proteins	-0.0674891	0.0662161	0.308638	0.747062
Anaerostipes hadrus	Calories	0.0441746	0.0432321	0.307401	0.747903
Bacteroides cellulosilyticus	Fiber	0.0530357	0.0522294	0.310522	0.748303
Phocaeicola dorei	Proteins	0.0445967	0.0439546	0.310995	0.749402
Roseburia hominis	Proteins	0.0767806	0.0757846	0.311511	0.749402
Oscillibacter sp MSJ 31	Fats	0.0475206	0.046265	0.304961	0.751
GGB3304 SGB4367	Sugar	-0.0469425	0.047836	0.327025	0.751732
Coprococcus catus	Carbohydrates	0.0386389	0.0375111	0.303506	0.754229
Bacteroides faecis	Carbohydrates	-0.0434452	0.0424164	0.306342	0.754229
Agathobaculum butyriciproducens	Proteins	0.0441952	0.0445578	0.321773	0.754356
Streptococcus thermophilus	Proteins	0.0761081	0.0766042	0.321043	0.754356
Clostridium sp AF36 4	Calories	-0.0606989	0.0607716	0.318415	0.755235
Bacteroides caccae	Proteins	0.0440641	0.0446351	0.324135	0.755523
Faecalibacterium sp HTFF	Fiber	0.0415011	0.0412485	0.314969	0.755925
Parasutterella SGB9260	Fiber	0.0387358	0.0387342	0.317895	0.756537
Bacteroides caccae	Sodium	0.0395339	0.0373054	0.28996	0.757533
Bacteroides ovatus	Calories	-0.0567579	0.057203	0.321653	0.758123
Coprococcus eutactus	Calories	0.0676165	0.0684668	0.323916	0.758123
Parabacteroides merdae	Fats	0.0353226	0.0347588	0.310192	0.758647
Parabacteroides distasonis	Sodium	0.0336995	0.0325987	0.301913	0.758713
Candidatus Cibionibacter quicibialis	Sodium	0.0406124	0.0396133	0.305936	0.758713
Blautia massiliensis	Sodium	-0.0385499	0.0375401	0.305145	0.758713
Roseburia inulinivorans	Sodium	0.0730601	0.0703692	0.299719	0.758713
GGB3175 SGB4191	Sodium	0.0454159	0.0433297	0.295229	0.758713
Blautia wexlerae	Fats	-0.0386569	0.0383648	0.314197	0.759318
Roseburia faecis	Fats	0.0760326	0.0751843	0.31244	0.759318
Sutterella wadsworthensis	Cholesterol	0.0247579	0.0251784	0.326177	0.760676
Ruminococcus lactaris	Cholesterol	-0.0375216	0.0386468	0.332239	0.760676
Alistipes putredinis	Fiber	-0.0431771	0.0434918	0.321518	0.761319
Phascolarctobacterium faecium	Fiber	-0.0384045	0.039331	0.329473	0.76316
Clostridiaceae bacterium	Cholesterol	0.0443936	0.046756	0.342923	0.767108
Blautia sp MCC283	Fats	0.0508804	0.0512162	0.321093	0.768019
Acidaminococcus intestini	Cholesterol	-0.0237054	0.0256443	0.355931	0.769006
GGB3175 SGB4191	Cholesterol	0.0384577	0.0420146	0.360607	0.769006
GGB4571 SGB6317	Proteins	0.0426401	0.0445416	0.338983	0.770188
GGB6606 SGB9340	Carbohydrates	0.0490504	0.0500963	0.328027	0.770292
Parabacteroides merdae	Carbohydrates	-0.0383427	0.0391472	0.327968	0.770292
Clostridium fessum	Cholesterol	0.027537	0.030244	0.363153	0.771947
GGB3175 SGB4191	Proteins	0.0485771	0.0513002	0.344218	0.772693
Clostridiales bacterium KLE1615	Calories	0.052042	0.0538773	0.334578	0.773793
Lacrimispora amygdalina	Sodium	-0.0507166	0.0507149	0.317842	0.775974
GGB9602 SGB15031	Cholesterol	-0.0367686	0.0407929	0.367993	0.77657
Ruminococcus callidus	Cholesterol	0.0275262	0.0309022	0.373661	0.776785
Ruminococcus bicirculans	Cholesterol	-0.0605477	0.0680477	0.374129	0.776785
Alistipes finegoldii	Cholesterol	-0.0383532	0.0428664	0.371541	0.776785
Bacteroides eggerthii	Cholesterol	0.0211188	0.0234596	0.368664	0.776785
Ruminococcus callidus	Carbohydrates	-0.0423151	0.0437133	0.333568	0.777904
Odoribacter splanchnicus	Calories	-0.0379336	0.0404111	0.348374	0.778941
GGB4552 SGB6276	Calories	-0.0549654	0.0580172	0.343923	0.778941
GGB1420 SGB1957	Proteins	0.0352696	0.0380068	0.353968	0.780334
Clostridium sp AF36 4	Proteins	-0.0499845	0.0541646	0.356624	0.780888
Roseburia inulinivorans	Sugar	0.0759	0.0811948	0.350375	0.782902
Oscillospiraceae bacterium CLA AA H250	Fats	-0.048954	0.0514511	0.34187	0.783034
Streptococcus salivarius	Fiber	0.0705522	0.0753657	0.349684	0.78347
GGB3175 SGB4191	Calories	0.0533667	0.0574685	0.353568	0.784721
Bacteroides faecis	Fiber	-0.0332316	0.0355731	0.350841	0.78482
Clostridium fessum	Fats	0.0357189	0.0378804	0.346229	0.785209
Faecalibacterium prausnitzii	Proteins	-0.0341585	0.0383493	0.373614	0.786089
Phascolarctobacterium faecium	Proteins	0.0358509	0.0402277	0.373382	0.786089
Ruminococcus bicirculans	Fats	-0.0776329	0.0831119	0.350751	0.786614
Faecalibacterium SGB15346	Fats	-0.0415107	0.0441984	0.3482	0.786614
Anaerostipes hadrus	Fats	0.0365378	0.0404297	0.366599	0.786614
Dorea formicigenerans	Fats	-0.0332523	0.0362033	0.358846	0.786614
Ruminococcus gnavus	Fats	0.0550413	0.0597703	0.357588	0.786614
Ruminococcus lactaris	Fats	0.0450862	0.0484943	0.353027	0.786614
Eubacterium siraeum	Fats	-0.0610912	0.0677357	0.367575	0.786614
Ruminococcus lactaris	Fiber	-0.042953	0.0463432	0.354541	0.787854
Bifidobacterium pseudocatenulatum	Proteins	0.0390719	0.0445366	0.380817	0.788897
Sutterella wadsworthensis	Fats	0.0294855	0.0333229	0.37684	0.790528
Lawsonibacter asaccharolyticus	Carbohydrates	0.0505217	0.0540205	0.350148	0.790764
Bifidobacterium pseudocatenulatum	Carbohydrates	0.046573	0.0502158	0.354173	0.79237
Coprococcus eutactus	Carbohydrates	0.063856	0.0689529	0.354928	0.79271
Bacteroides stercoris	Carbohydrates	-0.0344718	0.0372651	0.355581	0.792918
Barnesiella intestinihominis	Sugar	-0.033612	0.0368092	0.361771	0.793066
GGB9635 SGB15106	Sugar	0.0297055	0.0327267	0.364663	0.793066
Gemmiger formicilis	Sodium	0.0350999	0.0374037	0.348653	0.793717
GGB9708 SGB15234	Calories	0.0440229	0.049633	0.375595	0.794335
Alistipes ihumii	Proteins	-0.0416022	0.0481777	0.388306	0.79453
GGB51647 SGB4348	Sodium	0.0486476	0.0519619	0.349766	0.794591
Alistipes communis	Calories	-0.0458829	0.0520839	0.378803	0.795824
Parabacteroides merdae	Sodium	0.0252225	0.0275931	0.36131	0.798289
Roseburia faecis	Sodium	0.0562827	0.0617847	0.362893	0.798289
Clostridiales bacterium KLE1615	Sodium	-0.0390929	0.0430437	0.364279	0.798289
GGB3304 SGB4367	Sodium	0.0360064	0.0393369	0.360616	0.798289
Dysosmobacter welbionis	Fats	-0.0401652	0.0476612	0.399815	0.799229
Anaerobutyricum hallii	Fats	-0.0377347	0.0449705	0.401872	0.799229
GGB9602 SGB15031	Fats	0.0439412	0.0512234	0.391454	0.799229
Collinsella aerofaciens	Sugar	-0.0388826	0.044291	0.380515	0.800067
Blautia sp MCC283	Cholesterol	0.0336535	0.0398601	0.399081	0.800424
GGB9602 SGB15031	Sugar	0.0441231	0.0506819	0.384471	0.800605
Agathobaculum butyriciproducens	Calories	0.0414733	0.0476683	0.384748	0.80118
GGB47687 SGB2286	Cholesterol	-0.0324811	0.0389113	0.404407	0.803443
Anaerostipes hadrus	Fiber	0.0346829	0.0390796	0.375281	0.804844
Clostridiales bacterium KLE1615	Fiber	0.0438896	0.0490118	0.370992	0.804844
Wujia chipingensis	Fiber	0.042572	0.0478658	0.374264	0.804844
Fusicatenibacter saccharivorans	Fats	0.0387054	0.0482051	0.422425	0.805053
Oscillibacter sp MSJ 31	Sugar	0.0392302	0.0455889	0.390021	0.805058
Parabacteroides distasonis	Cholesterol	-0.0259533	0.0315025	0.41057	0.805145
Eubacterium ventriosum	Carbohydrates	-0.0479336	0.0535048	0.370791	0.805276
Phocaeicola massiliensis	Carbohydrates	-0.0305182	0.0343723	0.375215	0.805807
Roseburia intestinalis	Fiber	0.0639064	0.0731032	0.382466	0.805842
Anaerobutyricum hallii	Proteins	-0.0364182	0.0437193	0.405312	0.80607
Odoribacter splanchnicus	Fiber	-0.0305579	0.0356838	0.392285	0.807836
Odoribacter splanchnicus	Sugar	-0.0315631	0.0369205	0.393082	0.807844
GGB9758 SGB15368	Cholesterol	0.0271749	0.0334446	0.417063	0.80788
Bacteroides finegoldii	Cholesterol	-0.0231407	0.028526	0.417793	0.808189
Bacteroides eggerthii	Fiber	0.0248096	0.0291647	0.395556	0.809405
Bacteroides cellulosilyticus	Sugar	0.0455797	0.0542577	0.401377	0.809617
Clostridium sp AF36 4	Fats	-0.0439152	0.0557428	0.431232	0.810806
Faecalibacterium sp HTFF	Cholesterol	0.0266366	0.0340467	0.434523	0.811721
Bacteroides finegoldii	Sugar	-0.0295059	0.0361359	0.414697	0.812083
Oscillospiraceae bacterium	Carbohydrates	-0.0543385	0.0634707	0.392366	0.812267
Dialister invisus	Cholesterol	0.030524	0.0395863	0.44116	0.81303
GGB9602 SGB15031	Carbohydrates	0.0478408	0.0562549	0.395528	0.813047
Blautia massiliensis	Sugar	-0.0366869	0.0457611	0.423201	0.815429
Akkermansia muciniphila	Sugar	0.0629014	0.0779527	0.42013	0.815429
Clostridium sp AM49 4BH	Sugar	0.0489242	0.061259	0.424904	0.817478
GGB9758 SGB15368	Sodium	0.0296425	0.0348449	0.395529	0.818899
Bacteroides stercoris	Sugar	0.0251316	0.0319119	0.431525	0.819729
Bifidobacterium bifidum	Carbohydrates	0.0340362	0.0417136	0.414978	0.820145
Alistipes onderdonkii	Sugar	-0.03891	0.0498644	0.435692	0.820614
GGB51647 SGB4348	Fiber	0.0501999	0.0607502	0.409107	0.820691
Bifidobacterium adolescentis	Sugar	-0.0463428	0.0597191	0.438195	0.82093
Clostridium sp AM22 11AC	Fats	-0.0344066	0.0449679	0.444595	0.824014
Bacteroides stercoris	Proteins	-0.0240806	0.0313884	0.443512	0.824897
Bacteroides cellulosilyticus	Proteins	-0.0411012	0.0532276	0.440465	0.824897
GGB9758 SGB15368	Proteins	0.0322123	0.0422425	0.446225	0.824897
Coprococcus comes	Fiber	-0.0300098	0.0375286	0.424379	0.825441
Alistipes communis	Fats	-0.0359151	0.0479162	0.45393	0.825454
Bilophila wadsworthia	Fats	-0.0359787	0.047822	0.452243	0.825454
Blautia obeum	Calories	0.0435028	0.0559422	0.437184	0.826505
Ruminococcus bicirculans	Fiber	0.0634536	0.080097	0.42866	0.826617
Oscillibacter valericigenes	Fiber	0.0424663	0.0540405	0.432389	0.826617
Sutterella wadsworthensis	Carbohydrates	-0.0294072	0.0376619	0.435406	0.826781
Parasutterella SGB9260	Carbohydrates	-0.0353412	0.0450729	0.433403	0.826781
GGB3345 SGB4425	Sugar	0.0297239	0.0399257	0.457008	0.827392
Alistipes ihumii	Fiber	0.036317	0.0475224	0.445143	0.829691
Simiaoa sunii	Sodium	0.0537234	0.0664039	0.418972	0.82974
Blautia SGB4815	Fiber	-0.0303348	0.0410554	0.460404	0.830487
Bacteroides stercoris	Sodium	-0.0204441	0.025668	0.426327	0.830774
Clostridium sp AM22 11AC	Sodium	-0.0284326	0.037166	0.444722	0.830774
Coprococcus eutactus	Sodium	0.0384814	0.0498393	0.440557	0.830774
Streptococcus thermophilus	Sodium	-0.0554877	0.071288	0.436749	0.830774
Bacteroides fragilis	Sodium	0.0480133	0.0603582	0.426796	0.830774
Bacteroides faecis	Sodium	-0.0232463	0.0300857	0.44025	0.830774
Bifidobacterium longum	Cholesterol	0.0290359	0.040361	0.472348	0.832775
Lachnospira pectinoschiza	Cholesterol	0.0409736	0.0569365	0.472171	0.832775
Flavonifractor plautii	Fiber	-0.0443957	0.0618068	0.472949	0.832954
GGB9602 SGB15031	Fiber	0.0351515	0.0489221	0.47284	0.832954
Alistipes putredinis	Cholesterol	-0.0251091	0.0351069	0.474976	0.833015
Alistipes ihumii	Carbohydrates	-0.0402837	0.0532437	0.449673	0.833151
Bacteroides caccae	Carbohydrates	-0.0384462	0.0510679	0.451947	0.833395
Faecalibacillus intestinalis	Cholesterol	0.0288909	0.0405194	0.476267	0.833615
GGB3486 SGB4658	Proteins	0.0360823	0.0494196	0.465679	0.833632
Roseburia faecis	Calories	0.0624493	0.0819424	0.446381	0.833873
Lacrimispora amygdalina	Sugar	0.0430165	0.0588068	0.464844	0.834245
GGB3304 SGB4367	Cholesterol	-0.0267865	0.038019	0.481547	0.834603
Lachnospira eligens	Sodium	0.040506	0.0536295	0.450531	0.836838
Oscillibacter valericigenes	Sugar	0.0401466	0.0558491	0.47261	0.837965
Roseburia hominis	Cholesterol	-0.0449978	0.0653594	0.491536	0.838573
Agathobaculum butyriciproducens	Cholesterol	0.0259336	0.0385629	0.501629	0.841431
Lawsonibacter asaccharolyticus	Cholesterol	-0.0276115	0.0410219	0.501283	0.841431
Blautia SGB4815	Cholesterol	0.0229528	0.0341655	0.502125	0.841431
Eubacterium ventriosum	Sugar	-0.0354543	0.0501159	0.47964	0.842842
Fusicatenibacter saccharivorans	Proteins	0.0333736	0.0471247	0.479186	0.84289
Oscillibacter sp ER4	Carbohydrates	-0.0424281	0.0586526	0.469824	0.843536
Alistipes shahii	Calories	-0.0329276	0.0450688	0.46542	0.843834
Bacteroides ovatus	Fats	-0.0364654	0.0517223	0.481208	0.844635
Alistipes shahii	Sugar	-0.0259655	0.040038	0.517031	0.845283
Coprococcus eutactus	Sugar	0.0397069	0.0608951	0.514753	0.845283
Ruminococcus SGB4421	Sugar	-0.0283705	0.0415273	0.494896	0.845283
Eubacterium ventriosum	Calories	-0.0384603	0.0529968	0.468388	0.845671
Bilophila wadsworthia	Calories	-0.0375268	0.0520222	0.47105	0.845844
GGB9635 SGB15106	Calories	0.0268906	0.037558	0.474447	0.845844
Alistipes ihumii	Sugar	-0.0314948	0.0491027	0.521579	0.845997
Sutterella wadsworthensis	Fiber	-0.0207766	0.0312176	0.506149	0.847171
Bifidobacterium adolescentis	Sodium	-0.0362449	0.0491461	0.46129	0.847194
GGB4552 SGB6276	Carbohydrates	-0.0417675	0.0585928	0.476297	0.847281
Anaerobutyricum soehngenii	Fats	0.0450416	0.0645761	0.485864	0.847382
Simiaoa sunii	Fats	0.055236	0.0794276	0.487141	0.847409
Agathobaculum butyriciproducens	Sodium	0.0289086	0.0392752	0.462088	0.84756
Alistipes communis	Fiber	-0.029225	0.0458507	0.524213	0.847563
Phocaeicola vulgatus	Fiber	-0.0293427	0.0458383	0.522501	0.847563
Blautia faecis	Cholesterol	0.0208853	0.0319184	0.513298	0.847685
Dorea formicigenerans	Cholesterol	0.0190434	0.0294452	0.518183	0.847685
GGB9699 SGB15216	Sodium	-0.031457	0.0429021	0.463833	0.848885
Lachnospira pectinoschiza	Fiber	-0.041557	0.0666333	0.533158	0.848998
Roseburia inulinivorans	Fiber	0.0491943	0.0789706	0.533622	0.848998
Bacteroides clarus	Fiber	0.0200235	0.0320657	0.532723	0.848998
Bifidobacterium pseudocatenulatum	Calories	0.0349231	0.0498267	0.483722	0.849813
Roseburia inulinivorans	Proteins	0.0523628	0.0797266	0.511643	0.852154
GGB9715 SGB15265	Carbohydrates	0.0344365	0.0493533	0.485701	0.853769
Oscillibacter sp ER4	Cholesterol	-0.0262987	0.0418469	0.530106	0.854046
Parasutterella excrementihominis	Carbohydrates	-0.0356488	0.0521658	0.494738	0.854669
GGB9635 SGB15106	Carbohydrates	0.0256415	0.0377546	0.49745	0.854669
Phocaeicola dorei	Carbohydrates	-0.0330946	0.0518523	0.523705	0.855685
Bifidobacterium adolescentis	Carbohydrates	-0.0414659	0.0670354	0.536519	0.855685
Bacteroides uniformis	Carbohydrates	-0.0338136	0.0530574	0.524248	0.855685
Lacrimispora amygdalina	Carbohydrates	0.0391895	0.0625179	0.531073	0.855685
Blautia massiliensis	Carbohydrates	0.0320505	0.051518	0.534187	0.855685
Dialister invisus	Carbohydrates	-0.0345939	0.0551125	0.530518	0.855685
Paraprevotella clara	Fiber	0.0255193	0.0416687	0.540594	0.855742
Dorea longicatena	Fats	-0.0289085	0.0424201	0.49596	0.855796
Oscillibacter sp ER4	Proteins	0.0324584	0.051555	0.529315	0.856072
Lachnospira pectinoschiza	Proteins	-0.0418871	0.0675229	0.535341	0.856072
GGB33469 SGB15236	Proteins	0.0238105	0.0401667	0.553643	0.856072
Dorea longicatena	Proteins	0.025442	0.0410457	0.53572	0.856072
GGB4552 SGB6276	Proteins	-0.0313298	0.0532135	0.556313	0.856072
Alistipes putredinis	Fats	-0.0310406	0.046391	0.503859	0.856294
Oscillibacter sp ER4	Fats	0.0348831	0.0531133	0.511688	0.856294
Phascolarctobacterium faecium	Fats	-0.0262579	0.0416078	0.528355	0.856294
Eubacterium ventriosum	Fats	-0.033122	0.0500297	0.508264	0.856294
GGB51647 SGB4348	Fats	0.0406086	0.0638816	0.525327	0.856294
Ruminococcus SGB4421	Fats	-0.0269192	0.0421742	0.523646	0.856294
Lacrimispora amygdalina	Cholesterol	-0.0310491	0.0497951	0.533268	0.856947
Parabacteroides distasonis	Sugar	-0.0238675	0.0395484	0.546511	0.857095
Blautia obeum	Sugar	-0.0305645	0.050633	0.546405	0.857095
Simiaoa sunii	Sugar	-0.0478277	0.0789898	0.545159	0.857095
Alistipes finegoldii	Sodium	0.03155	0.0444189	0.477975	0.858563
Bacteroides ovatus	Sodium	0.0293061	0.0416693	0.482322	0.85908
Phocaeicola vulgatus	Cholesterol	0.0229617	0.0370694	0.536057	0.859429
Wujia chipingensis	Cholesterol	0.0249877	0.0406965	0.539571	0.859429
Faecalibacterium prausnitzii	Carbohydrates	-0.0261547	0.0439147	0.551762	0.85951
Bacteroides ovatus	Carbohydrates	-0.0345649	0.0576448	0.549081	0.85951
GGB1420 SGB1957	Fiber	0.0218445	0.0372967	0.558412	0.860502
Bacteroides ovatus	Fiber	-0.0293128	0.0489646	0.54976	0.860502
Eubacterium siraeum	Fiber	-0.0382442	0.0653065	0.558431	0.860502
Roseburia inulinivorans	Calories	0.0568271	0.0851479	0.504868	0.861222
Akkermansia muciniphila	Fiber	0.0441091	0.0755666	0.559703	0.861455
Parabacteroides distasonis	Calories	-0.0274743	0.0439376	0.53209	0.861519
Fusicatenibacter saccharivorans	Calories	0.0318581	0.0517806	0.538685	0.861519
Barnesiella intestinihominis	Calories	-0.0272624	0.0419718	0.516363	0.861519
Oscillibacter valericigenes	Calories	0.0380117	0.0603379	0.529012	0.861519
Phascolarctobacterium faecium	Calories	-0.0290639	0.0461869	0.529516	0.861519
Blautia wexlerae	Calories	-0.0264395	0.0418248	0.527601	0.861519
Bacteroides clarus	Calories	0.0240544	0.0379904	0.526983	0.861519
Clostridium fessum	Sodium	0.0217158	0.0312273	0.487216	0.862557
Ruminococcus bicirculans	Calories	-0.0539445	0.089334	0.546232	0.862724
Phascolarctobacterium faecium	Sodium	0.0229067	0.0334101	0.493398	0.863311
GGB9699 SGB15216	Sugar	-0.0292755	0.0507014	0.563947	0.864863
Streptococcus salivarius	Proteins	0.0433009	0.0760559	0.569404	0.865104
Lachnospira sp NSJ 43	Sugar	-0.0250128	0.0444466	0.57389	0.865811
Alistipes shahii	Sodium	0.0195337	0.0327308	0.551016	0.866735
Anaerostipes hadrus	Sodium	0.0204741	0.0342662	0.550496	0.866735
Blautia wexlerae	Sodium	-0.0193513	0.0316496	0.541278	0.866735
Blautia SGB4815	Sodium	-0.0208514	0.0352835	0.554892	0.866735
Ruminococcus SGB4421	Sodium	-0.0215093	0.0340696	0.528217	0.866735
Brotolimicola acetigignens	Carbohydrates	0.0472425	0.0822637	0.566051	0.86778
Eubacterium rectale	Cholesterol	0.0300196	0.0533048	0.573665	0.868781
Faecalicatena fissicatena	Calories	0.0294477	0.052134	0.572452	0.869111
Ruminococcus gnavus	Calories	0.0363803	0.0639973	0.56999	0.869111
GGB9715 SGB15265	Cholesterol	0.0195528	0.0348009	0.574575	0.869229
Bifidobacterium longum	Sodium	-0.0244484	0.0417105	0.558123	0.86942
Wujia chipingensis	Sodium	-0.0243309	0.0417529	0.560393	0.871039
GGB33469 SGB15236	Cholesterol	-0.017675	0.0326513	0.588613	0.872396
Bacteroides cellulosilyticus	Cholesterol	0.023547	0.0430462	0.584711	0.872396
Flavonifractor plautii	Cholesterol	-0.0281047	0.0524697	0.592513	0.872396
Blautia sp MCC283	Sodium	0.0239765	0.0413687	0.562558	0.872411
Bacteroides clarus	Proteins	0.0182338	0.0328227	0.578873	0.872933
GGB47687 SGB2286	Fiber	0.0254394	0.0468387	0.587338	0.873709
Roseburia hominis	Sodium	0.0384499	0.0667041	0.564622	0.873775
Paraprevotella clara	Sodium	0.0205352	0.0356998	0.565487	0.874159
Clostridiales bacterium KLE1615	Proteins	0.0271063	0.0496509	0.585371	0.875274
Anaerobutyricum soehngenii	Proteins	0.0343038	0.0628038	0.585212	0.875274
Bacteroides fragilis	Fiber	-0.0368922	0.0691308	0.593842	0.875643
Lawsonibacter asaccharolyticus	Fiber	0.0249772	0.0481913	0.604509	0.87623
GGB1420 SGB1957	Sugar	0.0204249	0.0387185	0.598118	0.876927
Lacrimispora amygdalina	Fats	-0.0317322	0.0586317	0.588617	0.877472
Bacteroides cellulosilyticus	Fats	0.0306648	0.0550478	0.577791	0.877472
Bifidobacterium pseudocatenulatum	Fats	0.025348	0.045812	0.580335	0.877472
Parasutterella excrementihominis	Fats	0.0255415	0.0468252	0.585736	0.877472
GGB47687 SGB2286	Fats	0.0264682	0.0491298	0.590346	0.877472
Bacteroides ovatus	Sugar	0.0267046	0.0509498	0.600483	0.877782
GGB9699 SGB15216	Proteins	-0.0267343	0.049783	0.591517	0.877975
Bifidobacterium longum	Fats	0.0270669	0.0507983	0.594423	0.878342
Bacteroides xylanisolvens	Fats	0.032637	0.0623704	0.601043	0.87842
GGB3304 SGB4367	Fats	-0.0254752	0.0485332	0.599932	0.87842
Coprococcus catus	Sugar	-0.0179136	0.0343232	0.601993	0.878772
Dorea longicatena	Carbohydrates	-0.0260347	0.0471978	0.581504	0.87963
Bacteroides xylanisolvens	Sodium	0.0265175	0.0514889	0.606836	0.880409
GGB9715 SGB15265	Sodium	0.0193522	0.0360694	0.591919	0.880409
GGB9635 SGB15106	Sodium	0.0137375	0.0264743	0.604169	0.880409
Phocaeicola massiliensis	Sodium	-0.0125479	0.0237141	0.597069	0.880409
Oscillospiraceae bacterium	Sugar	-0.029628	0.0580724	0.610169	0.880734
Lachnospira pectinoschiza	Sugar	0.0349315	0.0687807	0.611789	0.881118
Bifidobacterium pseudocatenulatum	Sodium	-0.0192745	0.0377723	0.610147	0.881475
Bacteroides uniformis	Sodium	0.0199923	0.0393851	0.612021	0.881576
Dysosmobacter welbionis	Sodium	0.0203328	0.0402489	0.613703	0.881576
Parabacteroides distasonis	Fats	-0.0203643	0.0400558	0.611441	0.88167
Lachnospira sp NSJ 43	Proteins	0.0228564	0.0436833	0.601082	0.88199
Ruminococcus callidus	Sodium	-0.0160958	0.0320279	0.615575	0.882241
Collinsella aerofaciens	Sodium	-0.0183488	0.0366454	0.616867	0.882307
Anaerobutyricum soehngenii	Sodium	-0.0266153	0.0531205	0.616633	0.882307
Roseburia inulinivorans	Fats	0.0408411	0.0808642	0.613756	0.882313
Ruminococcus bromii	Sugar	0.0313492	0.0621	0.61397	0.882589
GGB47687 SGB2286	Sodium	-0.0200036	0.0402265	0.619284	0.883113
Faecalibacillus intestinalis	Fats	-0.0249924	0.0498245	0.616184	0.883113
Blautia SGB4815	Sugar	0.0213714	0.042609	0.616233	0.883163
Blautia massiliensis	Fats	-0.0231862	0.0464364	0.617827	0.883357
Streptococcus salivarius	Carbohydrates	0.0437557	0.0816149	0.592146	0.886217
Oscillospiraceae bacterium CLA AA H250	Carbohydrates	0.0296604	0.0559975	0.596587	0.886217
Mediterraneibacter faecis	Cholesterol	0.0159309	0.0332826	0.632475	0.88697
Simiaoa sunii	Cholesterol	-0.0312426	0.0646359	0.629114	0.88697
Faecalibacterium SGB15346	Sodium	-0.0175025	0.035695	0.624196	0.887412
Bacteroides caccae	Cholesterol	-0.017157	0.0360376	0.634305	0.887525
Collinsella aerofaciens	Carbohydrates	-0.0256139	0.0494935	0.605046	0.887819
Anaerobutyricum soehngenii	Fiber	0.0301264	0.0617243	0.62575	0.888728
Bilophila wadsworthia	Proteins	-0.0233346	0.0465457	0.616398	0.888819
GGB6606 SGB9340	Calories	-0.0256556	0.04969	0.60588	0.890395
GGB4571 SGB6317	Calories	0.0263494	0.0505591	0.602514	0.890395
Phocaeicola massiliensis	Calories	-0.0176906	0.0342395	0.605708	0.890395
Phocaeicola dorei	Fats	-0.0213426	0.0458192	0.641643	0.890752
Bilophila wadsworthia	Sodium	0.0189555	0.0393935	0.630657	0.891113
Ruminococcus gnavus	Sodium	-0.0242576	0.0506048	0.631937	0.891113
Paraprevotella clara	Cholesterol	0.0161547	0.0345402	0.640274	0.891929
Faecalicatena fissicatena	Fats	0.0221357	0.0479035	0.644246	0.892614
Faecalicatena fissicatena	Fiber	0.0212462	0.0457792	0.642815	0.893559
Coprococcus catus	Fiber	0.01551	0.0332274	0.640884	0.893559
GGB47687 SGB2286	Sugar	-0.02242	0.0485644	0.644571	0.895154
Barnesiella intestinihominis	Carbohydrates	-0.0211945	0.0422294	0.616024	0.895489
GGB9699 SGB15216	Fiber	-0.0221913	0.0491031	0.651535	0.896648
Ruminococcus bicirculans	Sugar	-0.0377064	0.0828284	0.649158	0.896728
GGB9708 SGB15234	Sugar	-0.0193953	0.0442021	0.66106	0.896728
Bacteroides xylanisolvens	Sugar	-0.0277808	0.0618365	0.653468	0.896728
Bilophila wadsworthia	Sugar	-0.020926	0.0473639	0.658847	0.896728
Streptococcus salivarius	Sugar	0.0334561	0.0775078	0.666195	0.896728
Phocaeicola dorei	Fiber	0.0191976	0.0429513	0.655183	0.897234
Candidatus Cibionibacter quicibialis	Sugar	-0.0205807	0.048222	0.669763	0.897355
Dorea longicatena	Sugar	-0.0178838	0.0417786	0.668843	0.897355
Dialister invisus	Proteins	-0.0230463	0.0486223	0.635757	0.898872
GGB33469 SGB15236	Fats	-0.0179721	0.0413357	0.663939	0.898993
Ruminococcus bromii	Fats	0.02759	0.0630749	0.662043	0.898993
GGB9635 SGB15106	Fats	0.0144742	0.0334364	0.665356	0.898993
Phocaeicola massiliensis	Fats	-0.0130894	0.0301936	0.664913	0.898993
Eubacterium rectale	Carbohydrates	-0.0364759	0.0740954	0.622756	0.899355
Alistipes shahii	Carbohydrates	0.0222303	0.0453658	0.624371	0.899355
Faecalibacterium sp HTFF	Carbohydrates	0.023543	0.0481302	0.624976	0.899355
GGB3486 SGB4658	Carbohydrates	0.0260597	0.053061	0.623583	0.899355
Lawsonibacter asaccharolyticus	Sugar	0.0210114	0.0497801	0.673163	0.899826
Streptococcus salivarius	Cholesterol	-0.0295143	0.0664896	0.657339	0.900186
Bacteroides thetaiotaomicron	Calories	0.029072	0.0618813	0.638729	0.900187
Blautia sp MCC283	Calories	0.0269637	0.0566844	0.634542	0.900187
Bacteroides clarus	Carbohydrates	0.0181987	0.0382198	0.634222	0.900984
Blautia faecis	Calories	0.0195501	0.0431656	0.650824	0.902601
Lachnospira pectinoschiza	Carbohydrates	-0.0340666	0.0744325	0.647391	0.90385
Bacteroides fragilis	Carbohydrates	0.0344847	0.0776719	0.657261	0.903965
Eubacterium rectale	Proteins	-0.0300892	0.0653733	0.645563	0.904171
Blautia glucerasea	Fats	-0.0206243	0.0501653	0.681175	0.905675
Barnesiella intestinihominis	Proteins	-0.0164727	0.0361999	0.649346	0.905982
GGB9602 SGB15031	Sodium	0.0186451	0.0421421	0.658425	0.906054
Lawsonibacter asaccharolyticus	Calories	0.0238405	0.0535587	0.656432	0.906653
Ruminococcus bicirculans	Proteins	-0.0368595	0.0813392	0.650651	0.906813
Candidatus Cibionibacter quicibialis	Proteins	0.0211437	0.0474428	0.65608	0.90836
Collinsella aerofaciens	Proteins	0.0192742	0.0435482	0.658291	0.90836
Bacteroides faecis	Proteins	-0.0160568	0.0364306	0.659657	0.90836
Gemmiger formicilis	Proteins	0.0194359	0.0447831	0.664523	0.909144
Lachnospira pectinoschiza	Sodium	-0.0250791	0.0583666	0.667648	0.909148
Faecalibacterium sp HTFF	Sodium	-0.0150102	0.0352798	0.670747	0.909148
Bacteroides uniformis	Fiber	-0.018797	0.0459116	0.682448	0.90917
Oscillospiraceae bacterium CLA AA H250	Fiber	-0.0205826	0.0495375	0.677982	0.90917
Blautia glucerasea	Fiber	-0.0200059	0.0481442	0.677951	0.90917
Ruminococcus bromii	Fiber	-0.0253117	0.0597839	0.672249	0.90917
Alistipes communis	Sugar	0.019076	0.0475345	0.688392	0.909294
Faecalibacterium SGB15346	Calories	-0.0212435	0.0489283	0.664378	0.909918
Anaerostipes hadrus	Proteins	0.0168615	0.0396339	0.67072	0.910052
Lachnospira eligens	Fiber	0.0245395	0.0621775	0.693286	0.910661
GGB4571 SGB6317	Fats	-0.0182687	0.0459604	0.691212	0.910781
Oscillospiraceae bacterium CLA AA H250	Sugar	0.0176691	0.051223	0.730298	0.91137
Faecalibacillus intestinalis	Sugar	-0.0172805	0.0495639	0.727515	0.91137
Streptococcus thermophilus	Sugar	0.0266542	0.0782567	0.733579	0.91137
Alistipes finegoldii	Sugar	-0.0209024	0.0539449	0.698608	0.91137
GGB4571 SGB6317	Sugar	-0.0174944	0.0453517	0.699886	0.91137
Bifidobacterium bifidum	Sugar	0.0125841	0.0370098	0.734021	0.91137
GGB9342 SGB14306	Sugar	0.0223435	0.0631902	0.723811	0.91137
GGB4552 SGB6276	Sugar	-0.0192191	0.0542	0.723055	0.91137
Gemmiger formicilis	Carbohydrates	-0.0219529	0.0513102	0.668974	0.91184
Eubacterium rectale	Sodium	-0.0220618	0.0550948	0.689062	0.912322
Oscillibacter valericigenes	Sodium	-0.0173678	0.0471138	0.71259	0.912322
Lawsonibacter asaccharolyticus	Sodium	0.016475	0.0421004	0.695758	0.912322
Bifidobacterium bifidum	Sodium	0.0122844	0.0303599	0.685991	0.912322
GGB4571 SGB6317	Sodium	-0.0137051	0.0373321	0.713745	0.912975
Ruminococcus lactaris	Proteins	-0.0197784	0.0472082	0.675455	0.912984
Ruminococcus SGB4421	Proteins	-0.016587	0.0408148	0.684671	0.912984
Coprococcus catus	Cholesterol	-0.0118526	0.0280856	0.673247	0.91314
Streptococcus thermophilus	Cholesterol	0.0292829	0.0712202	0.681142	0.913664
Bacteroides xylanisolvens	Carbohydrates	-0.0289553	0.0683641	0.672094	0.914202
Ruminococcus callidus	Sugar	-0.0124108	0.0389428	0.750124	0.914528
Paraprevotella clara	Calories	0.0204238	0.0479167	0.670138	0.914639
Bacteroides thetaiotaomicron	Sodium	0.0163202	0.0454966	0.720017	0.914811
Faecalibacterium prausnitzii	Sodium	0.0111773	0.0321449	0.728252	0.916627
Eubacterium rectale	Calories	-0.0307439	0.0735143	0.675995	0.917321
Candidatus Cibionibacter quicibialis	Cholesterol	0.0150478	0.0382308	0.69411	0.917702
Bacteroides eggerthii	Proteins	-0.0118551	0.0299744	0.692716	0.918372
Alistipes onderdonkii	Carbohydrates	0.0230458	0.056761	0.684941	0.918443
Clostridium sp AM49 4BH	Calories	-0.0252003	0.0654159	0.700241	0.919046
Collinsella aerofaciens	Calories	0.0196604	0.0491048	0.689067	0.919046
Blautia glucerasea	Calories	-0.0209082	0.0542939	0.700342	0.919046
Bacteroides eggerthii	Calories	0.0143652	0.0353188	0.684448	0.919046
Parabacteroides distasonis	Proteins	0.0144451	0.0388828	0.710453	0.919366
Blautia wexlerae	Proteins	0.0144854	0.0374216	0.698886	0.919366
GGB3304 SGB4367	Proteins	-0.0174409	0.0470358	0.710981	0.919366
Faecalibacterium sp HTFF	Sugar	-0.0131521	0.0428701	0.759161	0.919566
Alistipes communis	Carbohydrates	-0.0201522	0.0525682	0.701633	0.919906
Clostridium sp AF36 4	Carbohydrates	-0.0219604	0.0613431	0.720513	0.919906
Clostridium fessum	Carbohydrates	-0.0152381	0.0415701	0.714112	0.919906
Roseburia faecis	Carbohydrates	0.0298694	0.0826446	0.717951	0.919906
Faecalibacillus intestinalis	Carbohydrates	-0.0184472	0.0541736	0.733616	0.919906
GGB3175 SGB4191	Carbohydrates	0.0210988	0.0579758	0.716081	0.919906
Lachnospira sp NSJ 43	Carbohydrates	-0.0182595	0.049095	0.710121	0.919906
Paraprevotella clara	Carbohydrates	0.0177086	0.0482899	0.714004	0.919906
Akkermansia muciniphila	Fats	-0.0283249	0.0781692	0.71725	0.920147
GGB33469 SGB15236	Carbohydrates	-0.014915	0.0456176	0.743851	0.920492
Bacteroides finegoldii	Proteins	-0.0124699	0.0355447	0.725911	0.920942
Faecalibacterium prausnitzii	Cholesterol	0.0112923	0.0310221	0.716067	0.921145
GGB3304 SGB4367	Carbohydrates	0.0174021	0.053755	0.746296	0.921321
Lacrimispora amygdalina	Proteins	-0.0198973	0.0577434	0.730563	0.921847
Bifidobacterium adolescentis	Fats	0.0202768	0.0605405	0.737846	0.922141
GGB9708 SGB15234	Fats	0.0154383	0.0449086	0.731199	0.922141
Oscillibacter valericigenes	Fats	0.0185203	0.0561439	0.741647	0.922141
GGB9699 SGB15216	Fats	0.0166059	0.050894	0.744355	0.922141
Bacteroides eggerthii	Fats	0.0102641	0.0312091	0.742445	0.922141
Bacteroides eggerthii	Carbohydrates	0.0111808	0.0354784	0.752835	0.922723
Bacteroides xylanisolvens	Cholesterol	-0.0179517	0.0499819	0.719676	0.922854
Dorea longicatena	Fiber	-0.014439	0.0402063	0.719701	0.92313
GGB9715 SGB15265	Fiber	0.0151466	0.0422578	0.720211	0.92313
Faecalibacterium SGB15346	Carbohydrates	0.0153065	0.0492884	0.756294	0.9232
GGB9708 SGB15234	Sodium	0.011737	0.0361778	0.745805	0.92322
Blautia obeum	Fats	-0.0163473	0.0512208	0.749764	0.92335
Dialister invisus	Fiber	0.0164042	0.0477173	0.731189	0.923607
Fusicatenibacter saccharivorans	Fiber	-0.0154955	0.0464452	0.738816	0.923876
Barnesiella intestinihominis	Fiber	-0.0115713	0.0353739	0.743771	0.923876
Blautia wexlerae	Fiber	0.0122368	0.0367668	0.739435	0.923876
Bifidobacterium bifidum	Fiber	-0.0114646	0.0356171	0.747713	0.923876
Blautia sp MCC283	Sugar	0.0143593	0.0505049	0.776319	0.924726
Blautia massiliensis	Calories	0.0189138	0.0511731	0.711856	0.924759
GGB9715 SGB15265	Fats	-0.0136456	0.0445118	0.759332	0.92479
GGB3345 SGB4425	Fats	-0.0123448	0.0403817	0.75998	0.92479
Alistipes putredinis	Carbohydrates	-0.0161803	0.0525398	0.758283	0.92483
Collinsella aerofaciens	Cholesterol	0.0117181	0.0354519	0.741188	0.925449
Clostridiales bacterium KLE1615	Cholesterol	0.0144283	0.042114	0.732074	0.925449
Faecalibacterium sp HTFF	Calories	0.0175188	0.047787	0.714091	0.925964
Bifidobacterium adolescentis	Fiber	-0.0181291	0.0575551	0.752938	0.926195
Phocaeicola massiliensis	Fiber	-0.00865375	0.0282324	0.759401	0.926195
Alistipes putredinis	Calories	-0.0176223	0.0522729	0.736214	0.926911
Oscillibacter valericigenes	Proteins	0.0182956	0.0548771	0.738993	0.927515
GGB9342 SGB14306	Cholesterol	0.0164252	0.0516866	0.750819	0.927754
GGB9699 SGB15216	Calories	-0.0174844	0.0545465	0.7487	0.92838
Lachnospira eligens	Cholesterol	0.0153822	0.0520345	0.767689	0.928974
GGB9635 SGB15106	Cholesterol	0.00744879	0.0253897	0.769417	0.928974
Parabacteroides merdae	Calories	-0.0123263	0.0389795	0.752	0.929211
Sutterella wadsworthensis	Sugar	-0.00888991	0.0325945	0.785212	0.929346
Bacteroides thetaiotaomicron	Sugar	0.0150743	0.0553803	0.785612	0.929346
Blautia faecis	Fiber	-0.0110296	0.0380639	0.772138	0.929944
Lachnospira sp NSJ 43	Calories	-0.0150334	0.0486861	0.757625	0.93044
Parasutterella SGB9260	Sugar	-0.0108617	0.0402664	0.787492	0.930701
Bacteroides ovatus	Proteins	-0.0154872	0.0500605	0.757206	0.930705
Clostridium sp AF36 4	Cholesterol	-0.0119085	0.0443841	0.788615	0.931152
Alistipes onderdonkii	Cholesterol	-0.0102055	0.0392042	0.794775	0.931624
Parabacteroides merdae	Proteins	0.00900673	0.0335175	0.788301	0.931812
Ruminococcus callidus	Proteins	0.00988223	0.038278	0.796408	0.931812
Bacteroides thetaiotaomicron	Proteins	0.0141905	0.0544158	0.794399	0.931812
Akkermansia muciniphila	Proteins	-0.0230251	0.0766048	0.763877	0.931812
Phocaeicola vulgatus	Proteins	0.0134521	0.0469683	0.774732	0.931812
Bacteroides fragilis	Proteins	0.0181045	0.0701665	0.796507	0.931812
GGB9635 SGB15106	Proteins	-0.00938065	0.0321825	0.770853	0.931812
Collinsella aerofaciens	Fats	0.0126503	0.0448742	0.778154	0.931995
Paraprevotella clara	Fats	0.0121939	0.043753	0.780612	0.931995
Clostridium sp AF36 4	Sodium	0.0127296	0.0458397	0.781394	0.932839
Coprococcus comes	Sodium	-0.00874203	0.0322007	0.786166	0.932839
Parasutterella SGB9260	Sodium	-0.00908487	0.0332297	0.784701	0.932839
Bacteroides finegoldii	Sodium	-0.00814068	0.0296147	0.78356	0.932839
GGB9342 SGB14306	Sodium	0.0142503	0.053141	0.788712	0.933666
Alistipes onderdonkii	Calories	0.016742	0.0564032	0.766746	0.933992
Akkermansia muciniphila	Calories	0.0247462	0.0835105	0.767113	0.933992
Blautia wexlerae	Cholesterol	0.00774916	0.030695	0.800828	0.934491
Oscillibacter sp MSJ 31	Cholesterol	0.00903129	0.0362048	0.803158	0.934491
GGB6606 SGB9340	Proteins	-0.0102871	0.0445854	0.817635	0.934745
Bifidobacterium longum	Proteins	0.0116223	0.0494022	0.814121	0.934745
Parasutterella excrementihominis	Proteins	0.010796	0.0453322	0.811888	0.934745
Faecalibacterium SGB15346	Fiber	0.0111304	0.0419583	0.790941	0.935226
Bacteroides fragilis	Sugar	0.0184964	0.0714569	0.795871	0.935231
GGB6606 SGB9340	Cholesterol	0.00875631	0.0367289	0.811697	0.935612
Barnesiella intestinihominis	Fats	-0.00944371	0.037562	0.80163	0.936647
Faecalibacillus intestinalis	Sodium	0.0108066	0.0417019	0.79566	0.937317
GGB4552 SGB6276	Fiber	-0.0131009	0.0525107	0.803095	0.938825
Alistipes shahii	Fiber	0.00897416	0.0385222	0.815917	0.939885
Phocaeicola dorei	Calories	-0.0132073	0.051618	0.798195	0.941061
Lacrimispora amygdalina	Calories	-0.0164443	0.0619467	0.790778	0.941061
Bacteroides xylanisolvens	Calories	-0.0184236	0.0678012	0.78595	0.941061
Gemmiger formicilis	Fiber	-0.0100678	0.0438646	0.818585	0.941252
Fusicatenibacter saccharivorans	Carbohydrates	-0.0133216	0.0522741	0.798957	0.941594
Bilophila wadsworthia	Carbohydrates	-0.0141109	0.0524691	0.788097	0.941594
Ruminococcus lactaris	Carbohydrates	0.0144001	0.0533118	0.787196	0.941594
GGB9699 SGB15216	Carbohydrates	0.0136577	0.0550548	0.804185	0.941875
Ruminococcus bromii	Calories	0.0170946	0.0696742	0.806302	0.942016
Paraprevotella clara	Sugar	-0.00961658	0.0432254	0.824054	0.942083
Simiaoa sunii	Calories	0.0208548	0.0856016	0.807626	0.942442
GGB9715 SGB15265	Calories	0.0115033	0.0490322	0.814622	0.942759
Parabacteroides merdae	Cholesterol	-0.00532868	0.0265171	0.840857	0.942803
Eubacterium ventriosum	Cholesterol	0.00855581	0.04219	0.839396	0.942803
Blautia faecis	Sugar	-0.00842119	0.0394091	0.830892	0.943177
GGB9715 SGB15265	Sugar	-0.00922442	0.0438872	0.833631	0.943177
Blautia sp MCC283	Fiber	0.0107247	0.0486185	0.825529	0.943466
Alistipes onderdonkii	Fiber	-0.00928823	0.048005	0.846684	0.944191
Candidatus Cibionibacter quicibialis	Fiber	-0.00884799	0.046466	0.84908	0.944191
Oscillospiraceae bacterium CLA AA H250	Proteins	-0.00990861	0.0503012	0.843928	0.944385
GGB47687 SGB2286	Carbohydrates	-0.0128134	0.0541524	0.813061	0.944412
Anaerobutyricum soehngenii	Calories	0.0159657	0.0704237	0.82075	0.944565
Parasutterella excrementihominis	Calories	-0.0109842	0.0518069	0.83219	0.944883
Lachnospira sp NSJ 43	Fiber	0.00770929	0.0429642	0.857681	0.945334
Blautia glucerasea	Carbohydrates	0.0121684	0.0547726	0.824284	0.945623
Bacteroides thetaiotaomicron	Carbohydrates	0.0132429	0.0623449	0.831883	0.945833
Clostridiaceae bacterium	Sodium	0.0109577	0.0477248	0.818507	0.946144
Bacteroides thetaiotaomicron	Fats	-0.0116137	0.0561848	0.836343	0.946212
Phocaeicola vulgatus	Fats	-0.0101613	0.0487908	0.83514	0.946212
Clostridium sp AM49 4BH	Proteins	0.0114816	0.0601828	0.848782	0.946359
Clostridium sp AM49 4BH	Sodium	0.0113958	0.0522253	0.827376	0.946865
Eubacterium ventriosum	Sodium	0.00949563	0.0430715	0.825615	0.946865
GGB4552 SGB6276	Sodium	-0.00968002	0.0459966	0.833418	0.946865
Blautia glucerasea	Sodium	-0.00855424	0.0416857	0.837515	0.947221
GGB4571 SGB6317	Fiber	0.00762034	0.0437043	0.86167	0.947302
Roseburia intestinalis	Carbohydrates	0.0164748	0.0810836	0.839081	0.947479
Clostridium sp AM49 4BH	Fats	-0.0123766	0.061357	0.840228	0.948018
Oscillibacter sp ER4	Fiber	-0.00847513	0.0505772	0.867007	0.94986
Roseburia faecis	Fiber	0.0118887	0.0718618	0.868679	0.950263
Ruminococcus callidus	Fats	0.00750814	0.0395012	0.849345	0.951306
Candidatus Cibionibacter quicibialis	Fats	0.00885148	0.0489927	0.856717	0.951483
Clostridiales bacterium KLE1615	Fats	-0.00903578	0.0506234	0.858415	0.951483
Roseburia inulinivorans	Carbohydrates	0.0159699	0.0860657	0.852879	0.952306
Bacteroides eggerthii	Sugar	-0.00537268	0.0305104	0.860325	0.952479
Faecalibacterium sp HTFF	Fats	-0.0075367	0.0434568	0.862398	0.953283
Blautia massiliensis	Proteins	0.0073673	0.0449961	0.870025	0.954119
Blautia obeum	Carbohydrates	-0.0099078	0.0564088	0.860653	0.954334
Wujia chipingensis	Sugar	-0.00814923	0.0494848	0.869268	0.955738
Coprococcus comes	Cholesterol	-0.00492784	0.0311512	0.874394	0.956487
Oscillibacter valericigenes	Carbohydrates	-0.00997837	0.0609114	0.869945	0.956525
Agathobaculum butyriciproducens	Carbohydrates	0.007214	0.0482086	0.881115	0.956525
Simiaoa sunii	Carbohydrates	-0.013538	0.0863735	0.875519	0.956525
Blautia faecis	Carbohydrates	-0.00619149	0.0435269	0.886948	0.956525
Ruminococcus gnavus	Carbohydrates	0.00955364	0.064614	0.882519	0.956525
Streptococcus thermophilus	Carbohydrates	-0.0120888	0.0795352	0.87928	0.956525
Bacteroides uniformis	Proteins	0.00736962	0.0467803	0.874898	0.956645
Lachnospira sp NSJ 43	Fats	-0.00710319	0.0448634	0.874269	0.956852
GGB9635 SGB15106	Fiber	0.00450638	0.0314081	0.885995	0.957248
Lachnospira sp NSJ 43	Cholesterol	-0.00559745	0.0359904	0.87649	0.957647
Odoribacter splanchnicus	Fats	0.0054798	0.0372702	0.883176	0.957777
Oscillibacter sp MSJ 31	Sodium	-0.00628048	0.0375244	0.867171	0.958624
Flavonifractor plautii	Sugar	0.00975556	0.0638583	0.878649	0.959559
Faecalibacillus intestinalis	Calories	0.00917242	0.0536963	0.864438	0.959714
Faecalibacterium SGB15346	Cholesterol	-0.00519862	0.0344252	0.880053	0.959754
Gemmiger formicilis	Calories	0.00775481	0.0509846	0.879177	0.959861
Ruminococcus callidus	Calories	-0.00710011	0.0434605	0.870302	0.959861
GGB33469 SGB15236	Calories	0.00666021	0.0452815	0.88313	0.959861
Clostridium fessum	Calories	-0.00642507	0.0412381	0.876255	0.959861
Ruminococcus lactaris	Calories	0.00774059	0.0528838	0.883693	0.959861
Streptococcus thermophilus	Calories	-0.0113138	0.0787201	0.885803	0.959861
Bacteroides fragilis	Calories	0.0115876	0.0769766	0.880407	0.959861
Roseburia intestinalis	Calories	0.0118755	0.0803102	0.88251	0.959861
GGB47687 SGB2286	Calories	-0.00857889	0.0537317	0.873218	0.959861
GGB3304 SGB4367	Calories	0.00768679	0.0533719	0.885548	0.959861
GGB33469 SGB15236	Fiber	0.00540989	0.0394128	0.890891	0.960047
Bacteroides cellulosilyticus	Calories	0.0084312	0.0606071	0.889425	0.960096
Clostridium sp AM49 4BH	Fiber	-0.00769038	0.0594207	0.89708	0.961305
Oscillibacter sp MSJ 31	Fiber	-0.00563129	0.0439743	0.898168	0.961305
Ruminococcus SGB4421	Fiber	0.00513077	0.0399757	0.89794	0.961305
Clostridium fessum	Sugar	0.00475823	0.0375422	0.899203	0.961986
Gemmiger formicilis	Cholesterol	0.00495497	0.036098	0.8909	0.963775
Barnesiella intestinihominis	Sodium	0.00452703	0.0299053	0.879765	0.965155
Fusicatenibacter saccharivorans	Sodium	0.00583536	0.0404979	0.8855	0.965355
Wujia chipingensis	Fats	-0.00616571	0.0496849	0.901293	0.965379
Mediterraneibacter faecis	Proteins	-0.00552974	0.0412007	0.8933	0.96632
Bacteroides thetaiotaomicron	Cholesterol	0.0055815	0.0439148	0.898935	0.967094
Streptococcus salivarius	Sodium	-0.00935871	0.0675623	0.889891	0.967808
Coprococcus eutactus	Fats	0.0071621	0.0618924	0.907934	0.968098
Lawsonibacter asaccharolyticus	Fats	-0.00558091	0.0499644	0.911111	0.96821
GGB47687 SGB2286	Proteins	-0.00607649	0.0477444	0.898787	0.968423
Alistipes ihumii	Sodium	0.00547698	0.0415729	0.895251	0.96887
Blautia obeum	Sodium	-0.00550797	0.0419696	0.895657	0.96887
Bifidobacterium pseudocatenulatum	Cholesterol	-0.00445596	0.0366176	0.903211	0.968899
Anaerobutyricum hallii	Cholesterol	0.00419578	0.0358371	0.906861	0.969038
Oscillibacter sp ER4	Calories	0.00664997	0.0582673	0.909187	0.969434
Sutterella wadsworthensis	Calories	0.0042932	0.0375471	0.909028	0.969434
Anaerostipes hadrus	Sugar	-0.00409946	0.0403774	0.919175	0.970914
Eubacterium siraeum	Sugar	0.00677478	0.0674979	0.920095	0.970914
GGB9699 SGB15216	Cholesterol	-0.00453869	0.0418453	0.913683	0.971395
Bacteroides clarus	Sugar	-0.00309377	0.0333981	0.926245	0.971883
Agathobaculum butyriciproducens	Sugar	-0.00375794	0.0454449	0.934131	0.973311
Bifidobacterium adolescentis	Calories	-0.00642718	0.0665657	0.923124	0.974391
Oscillospiraceae bacterium	Sodium	0.00561886	0.0488295	0.908446	0.975549
GGB9708 SGB15234	Carbohydrates	-0.00439881	0.0500482	0.930004	0.975632
Clostridium sp AM49 4BH	Carbohydrates	0.00638889	0.0660434	0.922976	0.975632
Parasutterella excrementihominis	Fiber	-0.00299937	0.044411	0.946189	0.975822
Blautia faecis	Fats	-0.00372841	0.039765	0.925341	0.976335
Faecalicatena fissicatena	Carbohydrates	0.00369808	0.0525734	0.943952	0.976518
Anaerobutyricum soehngenii	Carbohydrates	0.00491943	0.071005	0.944795	0.976518
Roseburia faecis	Proteins	0.0074565	0.0731541	0.918861	0.976946
Blautia sp MCC283	Carbohydrates	-0.00372586	0.0571136	0.948017	0.977066
Bacteroides clarus	Sodium	-0.00269477	0.0271327	0.920943	0.977874
Clostridium sp AM22 11AC	Cholesterol	0.0030532	0.0360662	0.93258	0.977889
GGB3486 SGB4658	Cholesterol	-0.00373476	0.0431836	0.93112	0.977889
Blautia wexlerae	Carbohydrates	-0.00221747	0.0422006	0.958116	0.978101
GGB9602 SGB15031	Proteins	0.00465753	0.049844	0.925596	0.978617
Ruminococcus SGB4421	Carbohydrates	-0.00233336	0.0468479	0.960299	0.978844
Lawsonibacter asaccharolyticus	Proteins	0.00392866	0.0488906	0.935989	0.979572
Parasutterella excrementihominis	Sodium	-0.00345908	0.0378097	0.927156	0.979741
Alistipes putredinis	Proteins	0.00325429	0.0446445	0.941933	0.980261
Oscillibacter sp MSJ 31	Proteins	0.00317832	0.0448741	0.943571	0.980261
Paraprevotella clara	Proteins	-0.00333352	0.0424666	0.93747	0.980261
Roseburia inulinivorans	Cholesterol	-0.00460489	0.0691716	0.946953	0.981615
Bacteroides caccae	Fats	0.00322125	0.0460926	0.944318	0.981626
Bacteroides fragilis	Fats	0.00482924	0.0717326	0.946354	0.981626
Roseburia intestinalis	Sodium	-0.00512938	0.0643891	0.936543	0.982204
Odoribacter splanchnicus	Proteins	-0.00229992	0.0362899	0.949496	0.983434
Blautia glucerasea	Proteins	0.00269394	0.0489309	0.956119	0.984037
Akkermansia muciniphila	Sodium	0.00483409	0.0662837	0.941896	0.984588
Oscillospiraceae bacterium	Fiber	-0.00239991	0.0561898	0.965951	0.984728
Eubacterium rectale	Fats	-0.00358147	0.0673	0.957584	0.985293
Brotolimicola acetigignens	Cholesterol	0.00326824	0.0619469	0.957951	0.985799
Bacteroides uniformis	Calories	-0.00252794	0.0526628	0.961735	0.985849
Lachnospira pectinoschiza	Calories	0.00345475	0.0737537	0.962659	0.985849
Streptococcus salivarius	Calories	0.00357353	0.0808195	0.964752	0.985965
Alistipes finegoldii	Fiber	0.00195687	0.0520086	0.970005	0.986729
Bacteroides cellulosilyticus	Sodium	0.00287692	0.0446014	0.948605	0.986939
Oscillospiraceae bacterium CLA AA H250	Calories	0.00222763	0.0555155	0.968009	0.987178
Oscillibacter valericigenes	Cholesterol	-0.00185268	0.0458739	0.967806	0.987442
GGB51647 SGB4348	Cholesterol	-0.00194165	0.0502328	0.969188	0.987442
Streptococcus thermophilus	Fiber	0.00268455	0.0767149	0.972101	0.987443
GGB3486 SGB4658	Sugar	0.00169448	0.0503895	0.973188	0.988131
Parasutterella excrementihominis	Sugar	0.00134201	0.0461419	0.976812	0.988682
Ruminococcus lactaris	Sodium	-0.00230423	0.0399297	0.954012	0.989737
Blautia glucerasea	Cholesterol	0.0010204	0.0404869	0.979906	0.990106
Ruminococcus bromii	Cholesterol	-0.00141101	0.0491153	0.977097	0.990106
Phocaeicola dorei	Sodium	-0.00120946	0.036186	0.973357	0.990139
GGB6606 SGB9340	Sodium	0.00131694	0.0378605	0.97227	0.990139
GGB33469 SGB15236	Sodium	0.00156521	0.0337904	0.963079	0.990139
Phocaeicola vulgatus	Sodium	-0.00139047	0.0386725	0.971339	0.990139
Lachnospira sp NSJ 43	Sodium	0.00180126	0.0371001	0.961302	0.990139
Faecalibacterium SGB15346	Sugar	-0.000819159	0.0435979	0.985019	0.990228
Bifidobacterium longum	Sugar	-0.000781782	0.0502993	0.987607	0.990404
Coprococcus comes	Carbohydrates	-0.000938066	0.0434635	0.98279	0.991897
Bacteroides caccae	Calories	0.000816114	0.0507471	0.987176	0.993601
Dorea longicatena	Calories	-0.000582677	0.0468956	0.990092	0.993601
GGB51647 SGB4348	Proteins	-0.00186825	0.0619638	0.975962	0.994217
Eubacterium ventriosum	Fiber	-0.000533253	0.0486784	0.991264	0.995482
Blautia obeum	Cholesterol	-0.000311554	0.0406276	0.993886	0.996488
Faecalibacillus intestinalis	Proteins	-0.000475284	0.0486864	0.992215	0.997853
Roseburia intestinalis	Fats	-0.000986685	0.0754553	0.989572	0.997937
Gemmiger formicilis	Fats	-0.000251191	0.046239	0.995668	0.9981
Streptococcus thermophilus	Fats	-0.000607507	0.0767769	0.993691	0.9981
Bacteroides caccae	Fiber	6.88964e-05	0.0437638	0.998745	0.999451

## Sheet: Table S5
Supplementary Table 5: Associations between gut microbial pathways and nutrient_3days.
Linear mixed-effects models were used to assess associations between gut microbial pathways abundance and mean of three days of dietary nutrient intake. Models included macronutrient intake as a continuous variable and were adjusted for DNA concentration, sequencing depth, age, BMI, Bristol stool scale, study center, batch, and time of collection, with participant ID included as a random effect. …
Pathways	Nutrient_3days	Beta	Standard error	P-value	Q-value
PWY-7663 Gondoate biosynthesis (anaerobic)	Cholesterol	-0.04472	0.014153	0.001682	0.019787
PWY-5973 cis-vaccenate biosynthesis	Cholesterol	-0.04303	0.013841	0.001995	0.022831
PWY-1269 CMP-3-deoxy-D-manno-octulosonate biosynthesis	Cholesterol	-0.06114	0.020944	0.003696	0.040615
PWY0-1479 tRNA processing	Proteins	0.069687	0.023962	0.003811	0.042089
PWY0-1479 tRNA processing	Calories	0.069353	0.026214	0.008426	0.084152
PWY0-1586 Peptidoglycan maturation (meso-diaminopimelate-containing)	Sugar	-0.04007	0.015369	0.009424	0.090571
FERMENTATION-PWY Mixed-acid fermentation	Cholesterol	0.045369	0.017829	0.011342	0.108533
PWY0-1061 Superpathway of L-alanine biosynthesis	Sugar	-0.09626	0.038493	0.012739	0.119832
THISYN-PWY Superpathway of thiamine diphosphate biosynthesis I	Sugar	-0.04649	0.01866	0.013077	0.122494
PWY-7663 Gondoate biosynthesis (anaerobic)	Fiber	-0.03716	0.015709	0.018439	0.161795
THRESYN-PWY Superpathway of L-threonine biosynthesis	Sugar	-0.03186	0.013544	0.019065	0.162787
PWY0-1479 tRNA processing	Fiber	0.055869	0.023668	0.01867	0.163182
PWY-7663 Gondoate biosynthesis (anaerobic)	Sugar	-0.03708	0.016109	0.021784	0.179776
PWY-6124 Inosine-5′-phosphate biosynthesis II	Carbohydrates	-0.03281	0.014184	0.021237	0.181328
ARGININE-SYN4-PWY L-ornithine biosynthesis II	Sugar	-0.0597	0.026049	0.022404	0.18219
PWY-7663 Gondoate biosynthesis (anaerobic)	Carbohydrates	-0.03833	0.016629	0.02169	0.183787
PWY-6124 Inosine-5′-phosphate biosynthesis II	Fiber	-0.03031	0.013337	0.023503	0.195417
PWY-5973 cis-vaccenate biosynthesis	Sugar	-0.03581	0.015958	0.025319	0.200353
THRESYN-PWY Superpathway of L-threonine biosynthesis	Carbohydrates	-0.03196	0.014171	0.024613	0.201251
PWY-6895 Superpathway of thiamine diphosphate biosynthesis II	Sugar	-0.07715	0.035014	0.028058	0.216765
THISYN-PWY Superpathway of thiamine diphosphate biosynthesis I	Cholesterol	-0.03603	0.016428	0.028781	0.227382
PWY-6123 Inosine-5′-phosphate biosynthesis I	Carbohydrates	-0.03072	0.014027	0.029093	0.22788
PWY0-845 Superpathway of pyridoxal 5′-phosphate biosynthesis and salvage	Cholesterol	-0.04955	0.022773	0.030138	0.232466
PWY-5971 Palmitate biosynthesis (type II fatty acid synthase)	Sugar	-0.05687	0.026257	0.030828	0.234378
PYRIDOXSYN-PWY Pyridoxal 5′-phosphate biosynthesis I	Cholesterol	-0.05377	0.02482	0.030877	0.237189
PWY-6859 All-trans-farnesol biosynthesis	Sugar	-0.06456	0.03001	0.031982	0.239059
PWY-6123 Inosine-5′-phosphate biosynthesis I	Fiber	-0.02851	0.013194	0.031227	0.240707
PYRIDNUCSYN-PWY NAD de novo biosynthesis I (from aspartate)	Sugar	-0.02865	0.013478	0.034072	0.247187
PWY-7663 Gondoate biosynthesis (anaerobic)	Calories	-0.03519	0.016454	0.033081	0.254121
PWY-6628 Superpathway of L-phenylalanine biosynthesis	Sodium	-0.03765	0.01764	0.033359	0.25985
PWY-7977 L-methionine biosynthesis IV	Sugar	-0.03012	0.014403	0.037024	0.260105
PWY-6124 Inosine-5′-phosphate biosynthesis II	Sodium	-0.02579	0.012141	0.03418	0.264388
POLYISOPRENSYN-PWY Polyisoprenoid biosynthesis (E. coli)	Sugar	-0.05361	0.025797	0.038234	0.265246
PWY-5973 cis-vaccenate biosynthesis	Fiber	-0.03264	0.015563	0.036498	0.265806
PWY-7392 Taxadiene biosynthesis (engineered)	Sugar	-0.05591	0.027244	0.040749	0.278345
PWY-5973 cis-vaccenate biosynthesis	Carbohydrates	-0.03432	0.016636	0.039767	0.283864
PWY-6123 Inosine-5′-phosphate biosynthesis I	Sugar	-0.02758	0.013541	0.042214	0.285209
PWY-6906 Chitin derivatives degradation	Sodium	-0.06772	0.032734	0.039185	0.285218
PWY-5505 L-glutamate and L-glutamine biosynthesis	Sugar	-0.05255	0.025876	0.042835	0.285272
PWY-6124 Inosine-5′-phosphate biosynthesis II	Sugar	-0.02781	0.013698	0.042919	0.285272
PWY-6123 Inosine-5′-phosphate biosynthesis I	Sodium	-0.02473	0.012012	0.040027	0.288089
PWY-6147 6-hydroxymethyl-dihydropterin diphosphate biosynthesis I	Sugar	-0.04367	0.021607	0.043836	0.290102
GLYCOLYSIS-ED-PWY Superpathway of glycolysis and the Entner–Doudoroff pathway	Sodium	-0.03308	0.016214	0.041927	0.291784
PWY-6703 preQ₀ biosynthesis	Cholesterol	-0.02695	0.013252	0.042578	0.296312
PWY-7345 Superpathway of anaerobic sucrose degradation	Sodium	-0.03139	0.015465	0.042983	0.297264
PWY-5188 Tetrapyrrole biosynthesis I (from glutamate)	Fiber	0.039807	0.019786	0.044797	0.30713
CITRULBIO-PWY L-citrulline biosynthesis	Sugar	-0.04348	0.022076	0.049518	0.314989
PWY-4041 γ-glutamyl cycle	Proteins	0.050601	0.025514	0.04792	0.333484
HISDEG-PWY L-histidine degradation I	Sugar	-0.04796	0.024769	0.053411	0.334006
PWY-5971 Palmitate biosynthesis (type II fatty acid synthase)	Fiber	-0.05009	0.025563	0.050656	0.337806
ASPASN-PWY Superpathway of L-aspartate and L-asparagine biosynthesis	Sugar	-0.03224	0.016719	0.05442	0.338412
THRESYN-PWY Superpathway of L-threonine biosynthesis	Fiber	-0.02579	0.013217	0.051567	0.340713
PWY-6124 Inosine-5′-phosphate biosynthesis II	Calories	-0.0276	0.014047	0.050125	0.34239
PYRIDNUCSYN-PWY NAD de novo biosynthesis I (from aspartate)	Carbohydrates	-0.02733	0.014027	0.052036	0.347954
PWY0-1479 tRNA processing	Fats	0.047947	0.024573	0.051626	0.352645
PWY-7198 Pyrimidine deoxyribonucleotides de novo biosynthesis IV	Carbohydrates	-0.05414	0.027946	0.053354	0.353573
PWY-6936 Seleno-amino acid biosynthesis (plants)	Fiber	0.039635	0.020601	0.054972	0.354761
PWY-5030 L-histidine degradation III	Sugar	-0.05494	0.029024	0.058974	0.361661
RHAMCAT-PWY L-rhamnose degradation I	Sugar	-0.03125	0.016525	0.059239	0.362286
SER-GLYSYN-PWY Superpathway of L-serine and glycine biosynthesis I	Sodium	-0.02444	0.012807	0.056985	0.368823
PWY66-399 Gluconeogenesis III	Cholesterol	-0.04167	0.021888	0.057614	0.371814
PWY-7197 Pyrimidine deoxyribonucleotide phosphorylation	Sodium	-0.02902	0.015267	0.057997	0.374282
POLYISOPRENSYN-PWY Polyisoprenoid biosynthesis (E. coli)	Proteins	0.048377	0.025346	0.056913	0.376031
PWY-7761 NAD salvage pathway II (PNC IV cycle)	Sodium	-0.04715	0.024858	0.058572	0.376896
PWY-6731 Starch degradation III	Carbohydrates	-0.03795	0.02015	0.060269	0.384045
GLYCOCAT-PWY Glycogen degradation I	Cholesterol	-0.04853	0.025824	0.060893	0.38526
PWY-6147 6-hydroxymethyl-dihydropterin diphosphate biosynthesis I	Cholesterol	-0.03415	0.018173	0.060913	0.38526
PWY-5973 cis-vaccenate biosynthesis	Calories	-0.03106	0.016466	0.059999	0.390612
PWY0-1586 Peptidoglycan maturation (meso-diaminopimelate-containing)	Carbohydrates	-0.03047	0.016383	0.063515	0.399443
PWY-6305 Superpathway of putrescine biosynthesis	Sugar	-0.04428	0.024466	0.070972	0.409239
PWY-6123 Inosine-5′-phosphate biosynthesis I	Calories	-0.02574	0.01389	0.064587	0.409443
HISDEG-PWY L-histidine degradation I	Fiber	-0.04412	0.024067	0.06738	0.413735
PENTOSE-P-PWY Pentose phosphate pathway	Sugar	-0.02819	0.015854	0.075991	0.4207
PWY-6147 6-hydroxymethyl-dihydropterin diphosphate biosynthesis I	Carbohydrates	-0.04147	0.023091	0.073159	0.431948
PWY-5154 L-arginine biosynthesis III (via N-acetyl-L-citrulline)	Cholesterol	-0.02874	0.015964	0.072536	0.432875
PWY0-1479 tRNA processing	Carbohydrates	0.047539	0.026561	0.074125	0.434101
PHOSLIPSYN-PWY Superpathway of phospholipid biosynthesis I (bacteria)	Sugar	-0.03453	0.019656	0.079578	0.43415
X1CMET2-PWY Folate transformations III (E. coli)	Sugar	-0.02372	0.013648	0.08286	0.437485
PWY-7208 Superpathway of pyrimidine nucleobase salvage	Sodium	-0.02506	0.013968	0.073458	0.442253
PWY-724 Superpathway of L-lysine, L-threonine, and L-methionine biosynthesis II	Sugar	-0.02289	0.013321	0.086452	0.446962
HISDEG-PWY L-histidine degradation I	Carbohydrates	-0.04651	0.026434	0.07919	0.450771
PWY0-845 Superpathway of pyridoxal 5′-phosphate biosynthesis and salvage	Sugar	-0.04697	0.027611	0.089601	0.451587
PWY-7229 Superpathway of adenosine nucleotides de novo biosynthesis I	Sugar	-0.02586	0.01535	0.092758	0.461184
PWY-3001 Superpathway of L-isoleucine biosynthesis I	Sugar	-0.02353	0.014016	0.093884	0.46316
PWY-841 Superpathway of purine nucleotides de novo biosynthesis I	Sugar	-0.02469	0.014892	0.098064	0.476373
HISTSYN-PWY L-histidine biosynthesis	Sugar	-0.02255	0.013617	0.098325	0.476411
P441-PWY Superpathway of N-acetylneuraminate degradation	Sugar	-0.0418	0.025289	0.099053	0.476411
PYRIDOXSYN-PWY Pyridoxal 5′-phosphate biosynthesis I	Sugar	-0.04988	0.030261	0.100003	0.476411
THRESYN-PWY Superpathway of L-threonine biosynthesis	Sodium	-0.02026	0.011927	0.090016	0.481374
PWY-2941 L-lysine biosynthesis II	Carbohydrates	-0.03683	0.021794	0.091703	0.482793
PWY-6731 Starch degradation III	Sugar	-0.03024	0.018608	0.104865	0.484481
GLYCOCAT-PWY Glycogen degradation I	Fats	0.053104	0.030684	0.084162	0.485403
PWY-5154 L-arginine biosynthesis III (via N-acetyl-L-citrulline)	Sugar	-0.03048	0.01884	0.10636	0.485853
PHOSLIPSYN-PWY Superpathway of phospholipid biosynthesis I (bacteria)	Cholesterol	-0.02818	0.016742	0.093099	0.487451
THISYN-PWY Superpathway of thiamine diphosphate biosynthesis I	Carbohydrates	-0.03257	0.019409	0.094155	0.488642
PWY-6168 Flavin biosynthesis III (fungi)	Cholesterol	-0.05251	0.031316	0.094333	0.488787
PWY-7977 L-methionine biosynthesis IV	Carbohydrates	-0.02562	0.015335	0.095522	0.489592
SER-GLYSYN-PWY Superpathway of L-serine and glycine biosynthesis I	Carbohydrates	-0.02569	0.015388	0.095713	0.489592
PWY-6901 Superpathway of glucose and xylose degradation	Sugar	-0.02335	0.014588	0.110124	0.491901
PWY-2941 L-lysine biosynthesis II	Fiber	-0.03344	0.019881	0.093223	0.493232
PWY-7663 Gondoate biosynthesis (anaerobic)	Proteins	-0.02705	0.015849	0.08857	0.494035
P441-PWY Superpathway of N-acetylneuraminate degradation	Proteins	0.042222	0.02482	0.089576	0.495904
PWY-6126 Superpathway of adenosine nucleotides de novo biosynthesis II	Sugar	-0.02672	0.016855	0.113573	0.496322
PWY-6608 Guanosine nucleotides degradation III	Sugar	-0.03352	0.021114	0.113042	0.496322
PWY-7228 Superpathway of guanosine nucleotides de novo biosynthesis I	Sugar	-0.02737	0.017199	0.112143	0.496322
PWY-841 Superpathway of purine nucleotides de novo biosynthesis I	Sodium	-0.02159	0.013089	0.099798	0.497376
PWY-5030 L-histidine degradation III	Carbohydrates	-0.05156	0.031167	0.098726	0.498746
PWY-5484 Glycolysis II (from fructose-6-phosphate)	Cholesterol	-0.0267	0.016253	0.101139	0.502446
PWY-6895 Superpathway of thiamine diphosphate biosynthesis II	Cholesterol	0.049485	0.030087	0.100747	0.502446
PWY-7282 4-amino-2-methyl-5-diphosphomethylpyrimidine biosynthesis II	Cholesterol	-0.02837	0.017422	0.104158	0.508578
PWY0-1061 Superpathway of L-alanine biosynthesis	Cholesterol	0.051876	0.031857	0.104236	0.508578
PWY-1042 Glycolysis IV	Sugar	-0.02238	0.014296	0.118139	0.510252
PWY-7229 Superpathway of adenosine nucleotides de novo biosynthesis I	Cholesterol	-0.02152	0.013263	0.105463	0.510627
GALACTUROCAT-PWY D-galacturonate degradation I	Sugar	-0.03384	0.02166	0.118842	0.51229
HISDEG-PWY L-histidine degradation I	Cholesterol	-0.03379	0.020886	0.106437	0.512558
ANAGLYCOLYSIS-PWY Glycolysis III (from glucose)	Sugar	-0.0212	0.013631	0.120492	0.514407
PWY-7198 Pyrimidine deoxyribonucleotides de novo biosynthesis IV	Fiber	-0.04189	0.025634	0.102928	0.514435
PWY-7117 C4 photosynthetic carbon assimilation cycle (PEPCK type)	Cholesterol	0.057884	0.035923	0.107877	0.51637
PWY-7228 Superpathway of guanosine nucleotides de novo biosynthesis I	Cholesterol	-0.02364	0.014655	0.10747	0.51637
PWY-7199 Pyrimidine deoxyribonucleosides salvage	Sugar	-0.02433	0.015668	0.121185	0.516375
PWY-5103 L-isoleucine biosynthesis III	Sugar	-0.02372	0.015296	0.12156	0.516979
THRESYN-PWY Superpathway of L-threonine biosynthesis	Calories	-0.02291	0.014058	0.104001	0.520705
PWY-6125 Superpathway of guanosine nucleotides de novo biosynthesis II	Sugar	-0.02776	0.017996	0.123625	0.521764
RHAMCAT-PWY L-rhamnose degradation I	Sodium	-0.02319	0.014373	0.107344	0.525467
GLUCUROCAT-PWY Superpathway of β-D-glucuronoside degradation	Sugar	-0.03295	0.021596	0.127725	0.52606
PWY-5667 CDP-diacylglycerol biosynthesis I	Sugar	-0.01986	0.013001	0.127314	0.52606
PWY0-1319 CDP-diacylglycerol biosynthesis II	Sugar	-0.01986	0.013001	0.127284	0.52606
RHAMCAT-PWY L-rhamnose degradation I	Cholesterol	-0.02237	0.014108	0.113517	0.526756
PWY-6126 Superpathway of adenosine nucleotides de novo biosynthesis II	Cholesterol	-0.02279	0.014387	0.113943	0.526988
PWY-6125 Superpathway of guanosine nucleotides de novo biosynthesis II	Cholesterol	-0.02407	0.015259	0.11546	0.531932
PWY-841 Superpathway of purine nucleotides de novo biosynthesis I	Fiber	-0.02312	0.014504	0.111573	0.533817
ANAEROFRUCAT-PWY Homolactic fermentation	Sodium	-0.02394	0.014979	0.110657	0.53404
SER-GLYSYN-PWY Superpathway of L-serine and glycine biosynthesis I	Sugar	-0.02211	0.014665	0.132243	0.536489
BRANCHED-CHAIN-AA-SYN-PWY Superpathway of branched-chain amino acid biosynthesis	Sugar	-0.02191	0.014587	0.133749	0.540842
PWY-7456 β-1,4-mannan degradation	Fats	0.031219	0.019558	0.111113	0.549379
PWY-7220 Adenosine deoxyribonucleotides de novo biosynthesis II	Sugar	-0.02911	0.019612	0.13837	0.550433
PWY-7222 Guanosine deoxyribonucleotides de novo biosynthesis II	Sugar	-0.02911	0.019612	0.13837	0.550433
PWY-4984 Urea cycle	Sugar	-0.03591	0.02432	0.140544	0.553784
ILEUSYN-PWY L-isoleucine biosynthesis I (from threonine)	Sugar	-0.02161	0.014689	0.141953	0.554818
PWY-7560 Methylerythritol phosphate pathway II	Sugar	-0.02431	0.016598	0.143641	0.557414
PANTOSYN-PWY Superpathway of coenzyme A biosynthesis I (bacteria)	Sugar	-0.01962	0.013468	0.145778	0.56088
PWY-2942 L-lysine biosynthesis III	Sugar	-0.01995	0.013794	0.148731	0.561535
PWY-841 Superpathway of purine nucleotides de novo biosynthesis I	Cholesterol	-0.01976	0.012922	0.126983	0.563806
PWY-7282 4-amino-2-methyl-5-diphosphomethylpyrimidine biosynthesis II	Sugar	-0.02966	0.020582	0.150277	0.566411
PWY-4984 Urea cycle	Carbohydrates	-0.04093	0.026714	0.126123	0.567938
PWY-7220 Adenosine deoxyribonucleotides de novo biosynthesis II	Cholesterol	-0.02502	0.016489	0.129874	0.57005
PWY-7222 Guanosine deoxyribonucleotides de novo biosynthesis II	Cholesterol	-0.02502	0.016489	0.129874	0.57005
PWY-5097 L-lysine biosynthesis VI	Sugar	-0.02022	0.014107	0.152368	0.570074
PWY-6897 Thiamine diphosphate salvage II	Sugar	-0.02216	0.015606	0.15636	0.571934
GLYCOLYSIS-ED-PWY Superpathway of glycolysis and the Entner–Doudoroff pathway	Sugar	-0.0265	0.018886	0.161244	0.575499
PWY-6823 Molybdopterin biosynthesis	Sugar	-0.02666	0.019068	0.162649	0.575886
PWY-7323 Superpathway of GDP-mannose-derived O-antigen building block biosynthesis	Sugar	-0.02432	0.01743	0.163594	0.576342
PANTO-PWY Phosphopantothenate biosynthesis I	Sugar	-0.01889	0.013643	0.166821	0.576857
PWY-5121 Superpathway of geranylgeranyl diphosphate biosynthesis II (via MEP)	Sugar	-0.02915	0.021113	0.168135	0.579595
PWY-6527 Stachyose degradation	Fiber	0.026655	0.017524	0.128917	0.580528
PWY-6823 Molybdopterin biosynthesis	Sodium	-0.02506	0.016402	0.127229	0.581168
RIBOSYN2-PWY Flavin biosynthesis I (bacteria and plants)	Sugar	-0.01899	0.013815	0.169988	0.583266
PWY-5695 Inosine-5′-phosphate degradation	Sugar	-0.01878	0.013799	0.174083	0.586961
PWY-7242 D-fructuronate degradation	Sugar	-0.03051	0.022373	0.173346	0.586961
PWY-5973 cis-vaccenate biosynthesis	Proteins	-0.02397	0.015709	0.127753	0.588404
PWY-6168 Flavin biosynthesis III (fungi)	Sugar	-0.05022	0.0372	0.177658	0.591305
ANAEROFRUCAT-PWY Homolactic fermentation	Cholesterol	-0.02175	0.014753	0.141089	0.594341
PWY-7229 Superpathway of adenosine nucleotides de novo biosynthesis I	Sodium	-0.02007	0.01346	0.136584	0.596884
PWY-7111 Pyruvate fermentation to isobutanol (engineered)	Sugar	-0.02372	0.017681	0.180473	0.59888
PWY-7229 Superpathway of adenosine nucleotides de novo biosynthesis I	Fiber	-0.02221	0.014952	0.138037	0.599942
GLYCOLYSIS-PWY Glycolysis I (from glucose-6-phosphate)	Cholesterol	-0.0238	0.016305	0.145201	0.602942
PWY-7383 Anaerobic energy metabolism (invertebrates, cytosol)	Cholesterol	-0.03864	0.0265	0.145581	0.602966
COA-PWY-1 Superpathway of coenzyme A biosynthesis III (mammals)	Sugar	-0.01801	0.013681	0.188684	0.609595
PWY-7851 Coenzyme A biosynthesis II (eukaryotic)	Sugar	-0.0181	0.013752	0.18877	0.609595
PANTO-PWY Phosphopantothenate biosynthesis I	Cholesterol	-0.01694	0.011761	0.150514	0.610184
PANTOSYN-PWY Superpathway of coenzyme A biosynthesis I (bacteria)	Cholesterol	-0.01675	0.011647	0.151201	0.610184
PWY-6507 4-deoxy-L-threo-hex-4-enopyranuronate degradation	Sodium	-0.02623	0.01795	0.144653	0.615069
NAGLIPASYN-PWY Lipid IVA biosynthesis (E. coli)	Cholesterol	-0.03379	0.023874	0.15782	0.617919
PWY-8073 Lipid IVA biosynthesis (Pseudomonas putida)	Cholesterol	-0.03379	0.023874	0.15782	0.617919
PYRIDOXSYN-PWY Pyridoxal 5′-phosphate biosynthesis I	Carbohydrates	-0.0475	0.032997	0.150671	0.618821
COA-PWY Coenzyme A biosynthesis I (prokaryotic)	Sugar	-0.01778	0.013796	0.19802	0.620095
PWY-6151 S-adenosyl-L-methionine salvage I	Sugar	-0.01841	0.014309	0.198863	0.620095
PWY-6609 Adenine and adenosine salvage III	Sugar	-0.01828	0.01426	0.200537	0.620095
PWY-7663 Gondoate biosynthesis (anaerobic)	Sodium	-0.02077	0.014412	0.150253	0.621739
PWY-724 Superpathway of L-lysine, L-threonine, and L-methionine biosynthesis II	Carbohydrates	-0.01963	0.01391	0.158904	0.625471
ARO-PWY Chorismate biosynthesis I	Sugar	-0.01699	0.013518	0.209449	0.6295
PWY-6703 preQ₀ biosynthesis	Sugar	-0.01986	0.01571	0.206857	0.6295
PWY66-429 Fatty acid biosynthesis initiation (mitochondria)	Sugar	-0.01637	0.012974	0.207568	0.6295
PWY-6270 Isoprene biosynthesis I	Sugar	-0.01846	0.014737	0.210885	0.630101
P441-PWY Superpathway of N-acetylneuraminate degradation	Cholesterol	0.029615	0.021417	0.167474	0.632711
PWY-7220 Adenosine deoxyribonucleotides de novo biosynthesis II	Carbohydrates	-0.02924	0.020984	0.164137	0.633225
PWY-7222 Guanosine deoxyribonucleotides de novo biosynthesis II	Carbohydrates	-0.02924	0.020984	0.164137	0.633225
PWY-6121 5-aminoimidazole ribonucleotide biosynthesis I	Sugar	-0.01695	0.013606	0.213365	0.63325
PWY-6608 Guanosine nucleotides degradation III	Cholesterol	0.024559	0.017847	0.169515	0.634609
PYRIDNUCSYN-PWY NAD de novo biosynthesis I (from aspartate)	Calories	-0.02012	0.013904	0.14865	0.635112
PWY0-1479 tRNA processing	Sugar	0.030243	0.024567	0.218931	0.636668
PWY-6163 Chorismate biosynthesis from 3-dehydroquinate	Sugar	-0.01688	0.013739	0.219866	0.637209
PWY0-1261 Anhydromuropeptides recycling I	Fats	0.034597	0.024065	0.1512	0.638316
HISDEG-PWY L-histidine degradation I	Calories	-0.03748	0.026205	0.153324	0.638859
PYRIDNUCSYN-PWY NAD de novo biosynthesis I (from aspartate)	Fiber	-0.01841	0.013178	0.163042	0.640206
CALVIN-PWY Calvin–Benson–Bassham cycle	Sugar	-0.01792	0.014733	0.224552	0.640418
PWY-6629 Superpathway of L-tryptophan biosynthesis	Sugar	-0.01676	0.013771	0.224117	0.640418
PWY-7229 Superpathway of adenosine nucleotides de novo biosynthesis I	Carbohydrates	-0.02214	0.016113	0.170096	0.642057
PWY-6124 Inosine-5′-phosphate biosynthesis II	Cholesterol	-0.01625	0.01204	0.177711	0.642537
PWY-841 Superpathway of purine nucleotides de novo biosynthesis I	Carbohydrates	-0.02138	0.01559	0.171072	0.643695
PWY-5971 Palmitate biosynthesis (type II fatty acid synthase)	Carbohydrates	-0.0377	0.027743	0.174905	0.645621
PWY-6897 Thiamine diphosphate salvage II	Sodium	-0.01868	0.013535	0.168151	0.645839
PWY-8004 Entner–Doudoroff pathway I	Sodium	-0.02321	0.016784	0.167425	0.645839
PWY-7228 Superpathway of guanosine nucleotides de novo biosynthesis I	Carbohydrates	-0.02465	0.018225	0.176932	0.647097
SER-GLYSYN-PWY Superpathway of L-serine and glycine biosynthesis I	Calories	-0.02141	0.015233	0.160649	0.648439
PWY-6353 Purine nucleotides degradation II (aerobic)	Cholesterol	0.026081	0.019499	0.181777	0.648786
PWY-6124 Inosine-5′-phosphate biosynthesis II	Proteins	-0.01899	0.013476	0.159367	0.649165
ARG-POLYAMINE-SYN-PWY Superpathway of arginine and polyamine biosynthesis	Cholesterol	0.033777	0.025411	0.184529	0.651879
X1CMET2-PWY Folate transformations III (E. coli)	Carbohydrates	-0.01923	0.014337	0.180476	0.65235
PWY-5188 Tetrapyrrole biosynthesis I (from glutamate)	Carbohydrates	0.028951	0.021767	0.184172	0.65235
PWY-6125 Superpathway of guanosine nucleotides de novo biosynthesis II	Carbohydrates	-0.0254	0.019137	0.185171	0.65235
PWY-6126 Superpathway of adenosine nucleotides de novo biosynthesis II	Carbohydrates	-0.02362	0.017839	0.186085	0.65235
PWY-6895 Superpathway of thiamine diphosphate biosynthesis II	Carbohydrates	-0.04926	0.036973	0.183484	0.65235
PWY4FS-7 Phosphatidylglycerol biosynthesis I (plastidic)	Cholesterol	-0.02375	0.018094	0.190108	0.652664
PWY4FS-8 Phosphatidylglycerol biosynthesis II (non-plastidic)	Cholesterol	-0.02375	0.018094	0.19011	0.652664
PWY-5484 Glycolysis II (from fructose-6-phosphate)	Carbohydrates	-0.02666	0.020189	0.187356	0.654641
COMPLETE-ARO-PWY Superpathway of aromatic amino acid biosynthesis	Sugar	-0.01619	0.013545	0.232657	0.655454
PWY-6292 Superpathway of L-cysteine biosynthesis (mammalian)	Sodium	-0.02536	0.019014	0.18297	0.656479
PWY-6353 Purine nucleotides degradation II (aerobic)	Calories	0.033722	0.024391	0.167467	0.656851
PWY-5100 Pyruvate fermentation to acetate and lactate II	Cholesterol	0.021911	0.016909	0.195731	0.658039
PWY-6123 Inosine-5′-phosphate biosynthesis I	Cholesterol	-0.0154	0.011913	0.196862	0.658039
PWY-7197 Pyrimidine deoxyribonucleotide phosphorylation	Cholesterol	-0.01959	0.01506	0.193997	0.658039
PWY-5941 Glycogen degradation II	Sugar	-0.01812	0.015272	0.235962	0.658425
THISYNARA-PWY Superpathway of thiamine diphosphate biosynthesis III (eukaryotes)	Sodium	-0.01928	0.014554	0.18603	0.661492
PWY-6126 Superpathway of adenosine nucleotides de novo biosynthesis II	Sodium	-0.01935	0.014649	0.187202	0.661766
PWY-7345 Superpathway of anaerobic sucrose degradation	Cholesterol	-0.01945	0.015201	0.201533	0.662819
COLANSYN-PWY Colanic acid building blocks biosynthesis	Sugar	-0.01719	0.014639	0.240929	0.663601
NAGLIPASYN-PWY Lipid IVA biosynthesis (E. coli)	Sugar	-0.03428	0.029195	0.240915	0.663601
PWY-8073 Lipid IVA biosynthesis (Pseudomonas putida)	Sugar	-0.03428	0.029195	0.240915	0.663601
GALACTUROCAT-PWY D-galacturonate degradation I	Carbohydrates	-0.03047	0.023415	0.193832	0.665144
PHOSLIPSYN-PWY Superpathway of phospholipid biosynthesis I (bacteria)	Carbohydrates	-0.02717	0.020848	0.193094	0.665144
DTDPRHAMSYN-PWY dTDP-β-L-rhamnose biosynthesis	Sugar	-0.01783	0.015253	0.243022	0.665776
PENTOSE-P-PWY Pentose phosphate pathway	Carbohydrates	-0.0216	0.016638	0.195017	0.6659
PWY-7228 Superpathway of guanosine nucleotides de novo biosynthesis I	Fiber	-0.02277	0.016736	0.174389	0.666162
PWY-6126 Superpathway of adenosine nucleotides de novo biosynthesis II	Fiber	-0.02219	0.016403	0.176791	0.667477
PWY-7198 Pyrimidine deoxyribonucleotides de novo biosynthesis IV	Calories	-0.03754	0.027712	0.176213	0.668132
PWY-6123 Inosine-5′-phosphate biosynthesis I	Proteins	-0.01821	0.013324	0.172405	0.669032
PWY-6168 Flavin biosynthesis III (fungi)	Proteins	0.049815	0.036521	0.173219	0.669032
PWY-6901 Superpathway of glucose and xylose degradation	Carbohydrates	-0.01948	0.015173	0.19984	0.66958
THISYNARA-PWY Superpathway of thiamine diphosphate biosynthesis III (eukaryotes)	Sugar	-0.01973	0.017019	0.246846	0.669924
FERMENTATION-PWY Mixed-acid fermentation	Fiber	0.028878	0.021543	0.180815	0.671254
PWY-6122 5-aminoimidazole ribonucleotide biosynthesis II	Sugar	-0.01611	0.014013	0.25074	0.672278
PWY-6277 Superpathway of 5-aminoimidazole ribonucleotide biosynthesis	Sugar	-0.01611	0.014013	0.25074	0.672278
NONOXIPENT-PWY Pentose phosphate pathway, non-oxidative branch I	Cholesterol	0.01865	0.014799	0.208306	0.673129
PWY-2941 L-lysine biosynthesis II	Sugar	-0.02353	0.020499	0.251611	0.673795
PWY-6731 Starch degradation III	Fiber	-0.02405	0.018047	0.18329	0.67394
PWY-724 Superpathway of L-lysine, L-threonine, and L-methionine biosynthesis II	Sodium	-0.01539	0.011754	0.190965	0.673993
PWY-4041 γ-glutamyl cycle	Sodium	-0.02923	0.022382	0.192198	0.674342
PWY-4984 Urea cycle	Sodium	-0.02653	0.02037	0.193557	0.674342
PWY-7663 Gondoate biosynthesis (anaerobic)	Fats	-0.02188	0.015944	0.17077	0.675776
PWY-7228 Superpathway of guanosine nucleotides de novo biosynthesis I	Sodium	-0.01934	0.014931	0.195899	0.675961
ANAEROFRUCAT-PWY Homolactic fermentation	Carbohydrates	-0.02297	0.018037	0.203584	0.676582
PWY-5484 Glycolysis II (from fructose-6-phosphate)	Sodium	-0.0213	0.016564	0.199119	0.676595
GALACTUROCAT-PWY D-galacturonate degradation I	Fiber	-0.02759	0.021007	0.18964	0.677654
PWY-7761 NAD salvage pathway II (PNC IV cycle)	Fiber	0.03795	0.028853	0.189132	0.677654
NONMEVIPP-PWY Methylerythritol phosphate pathway I	Sugar	-0.01585	0.013916	0.255234	0.677934
PWY-6507 4-deoxy-L-threo-hex-4-enopyranuronate degradation	Sugar	-0.02415	0.021203	0.255294	0.677934
PWY-6731 Starch degradation III	Sodium	-0.02028	0.015798	0.200055	0.67805
GLYCOLYSIS-PWY Glycolysis I (from glucose-6-phosphate)	Carbohydrates	-0.02561	0.020168	0.204867	0.678812
PWY-6470 Peptidoglycan biosynthesis V (β-lactam resistance)	Sugar	-0.03222	0.028358	0.256505	0.679011
CITRULBIO-PWY L-citrulline biosynthesis	Carbohydrates	-0.03038	0.024016	0.206515	0.679179
PWY0-845 Superpathway of pyridoxal 5′-phosphate biosynthesis and salvage	Carbohydrates	-0.03791	0.02999	0.206854	0.679179
GLYCOLYSIS-PWY Glycolysis I (from glucose-6-phosphate)	Sodium	-0.02111	0.016599	0.204083	0.679769
PWY-6305 Superpathway of putrescine biosynthesis	Sodium	-0.02647	0.020882	0.2057	0.679769
PWY-7198 Pyrimidine deoxyribonucleotides de novo biosynthesis IV	Sodium	-0.02886	0.022833	0.206927	0.679769
PWY-5188 Tetrapyrrole biosynthesis I (from glutamate)	Calories	0.028622	0.021563	0.185055	0.680168
GLCMANNANAUT-PWY Superpathway of N-acetylglucosamine, N-acetylmannosamine, and N-acetylneuraminate degradation	Sugar	-0.02064	0.018275	0.259225	0.682656
PWY-6892 Thiazole component of thiamine diphosphate biosynthesis I	Sugar	-0.0193	0.017129	0.260377	0.683375
GLUCUROCAT-PWY Superpathway of β-D-glucuronoside degradation	Carbohydrates	-0.02776	0.022801	0.22415	0.685027
HISTSYN-PWY L-histidine biosynthesis	Carbohydrates	-0.0175	0.014406	0.225199	0.685027
PWY-2942 L-lysine biosynthesis III	Carbohydrates	-0.01773	0.014496	0.221983	0.685027
PWY-3001 Superpathway of L-isoleucine biosynthesis I	Carbohydrates	-0.01791	0.014682	0.223218	0.685027
PWY-5154 L-arginine biosynthesis III (via N-acetyl-L-citrulline)	Carbohydrates	-0.02449	0.020018	0.221827	0.685027
PWY4FS-7 Phosphatidylglycerol biosynthesis I (plastidic)	Carbohydrates	-0.02827	0.022721	0.214091	0.685027
PWY4FS-8 Phosphatidylglycerol biosynthesis II (non-plastidic)	Carbohydrates	-0.02827	0.022721	0.214095	0.685027
PWY-7117 C4 photosynthetic carbon assimilation cycle (PEPCK type)	Fiber	0.054214	0.041739	0.194635	0.687105
PWY-6901 Superpathway of glucose and xylose degradation	Sodium	-0.01612	0.01292	0.212655	0.688182
VALSYN-PWY L-valine biosynthesis	Sugar	-0.01551	0.013863	0.263846	0.688295
PWY-6125 Superpathway of guanosine nucleotides de novo biosynthesis II	Fiber	-0.02267	0.017504	0.195935	0.689345
PWY-6124 Inosine-5′-phosphate biosynthesis II	Fats	-0.01796	0.013561	0.186111	0.690913
PWY-3841 Folate transformations II (plants)	Sugar	-0.0158	0.014337	0.27101	0.691504
TRPSYN-PWY L-tryptophan biosynthesis	Sugar	-0.01638	0.014909	0.272547	0.691504
PWY-5121 Superpathway of geranylgeranyl diphosphate biosynthesis II (via MEP)	Proteins	0.027226	0.020757	0.190308	0.69466
PWY-6906 Chitin derivatives degradation	Fats	0.051643	0.039176	0.188078	0.694731
RIBOSYN2-PWY Flavin biosynthesis I (bacteria and plants)	Sodium	-0.01495	0.012148	0.219091	0.695824
PWY-2941 L-lysine biosynthesis II	Cholesterol	-0.02113	0.017313	0.222916	0.696182
PWY-7220 Adenosine deoxyribonucleotides de novo biosynthesis II	Fiber	-0.02411	0.01906	0.20645	0.696534
PWY-7222 Guanosine deoxyribonucleotides de novo biosynthesis II	Fiber	-0.02411	0.01906	0.20645	0.696534
SER-GLYSYN-PWY Superpathway of L-serine and glycine biosynthesis I	Fiber	-0.01816	0.014285	0.204212	0.696534
ARGININE-SYN4-PWY L-ornithine biosynthesis II	Carbohydrates	-0.03476	0.029018	0.231553	0.696541
PWY-6270 Isoprene biosynthesis I	Sodium	-0.0161	0.013206	0.223488	0.69683
PWY66-409 Superpathway of purine nucleotide salvage	Sodium	-0.03206	0.026291	0.223363	0.69683
PWY-7237 Myo-, chiro-, and scyllo-inositol degradation	Proteins	0.022272	0.017037	0.191798	0.696876
PWY-7198 Pyrimidine deoxyribonucleotides de novo biosynthesis IV	Proteins	-0.03377	0.025914	0.193138	0.69753
PWY-6902 Chitin degradation II (Vibrio)	Sugar	-0.03461	0.031914	0.278732	0.698402
PWY66-409 Superpathway of purine nucleotide salvage	Sugar	-0.03345	0.030843	0.278715	0.698402
PWY-6902 Chitin degradation II (Vibrio)	Fats	0.042121	0.032179	0.19123	0.698405
P41-PWY Pyruvate fermentation to acetate and S-lactate I	Cholesterol	0.020859	0.017369	0.230443	0.700214
PWY0-1261 Anhydromuropeptides recycling I	Cholesterol	-0.02502	0.020683	0.227096	0.700214
PWY66-409 Superpathway of purine nucleotide salvage	Cholesterol	0.031009	0.025693	0.228165	0.700214
PWY-6125 Superpathway of guanosine nucleotides de novo biosynthesis II	Sodium	-0.01874	0.015567	0.229376	0.701965
PWY0-1296 Purine ribonucleosides degradation	Sodium	-0.01659	0.013818	0.23051	0.701965
PWY-3841 Folate transformations II (plants)	Cholesterol	-0.01449	0.012112	0.232147	0.702024
GLUCUROCAT-PWY Superpathway of β-D-glucuronoside degradation	Fiber	-0.02606	0.021025	0.215854	0.702632
PWY-6527 Stachyose degradation	Cholesterol	0.01795	0.01505	0.233674	0.703875
HISTSYN-PWY L-histidine biosynthesis	Cholesterol	-0.01375	0.011637	0.23812	0.704598
PYRIDNUCSYN-PWY NAD de novo biosynthesis I (from aspartate)	Sodium	-0.0143	0.011953	0.232272	0.705225
PWY-6507 4-deoxy-L-threo-hex-4-enopyranuronate degradation	Proteins	-0.02606	0.020805	0.21101	0.708059
PWY-6859 All-trans-farnesol biosynthesis	Proteins	0.037148	0.029618	0.210411	0.708059
COA-PWY Coenzyme A biosynthesis I (prokaryotic)	Cholesterol	-0.01389	0.011886	0.243231	0.709455
COA-PWY-1 Superpathway of coenzyme A biosynthesis III (mammals)	Sodium	-0.01418	0.011996	0.237711	0.711293
PWY-7111 Pyruvate fermentation to isobutanol (engineered)	Sodium	-0.01803	0.015209	0.236407	0.711293
PWY0-162 Superpathway of pyrimidine ribonucleotides de novo biosynthesis	Sodium	-0.01894	0.016015	0.237738	0.711293
PYRIDNUCSYN-PWY NAD de novo biosynthesis I (from aspartate)	Cholesterol	-0.01363	0.011808	0.24903	0.712573
X1CMET2-PWY Folate transformations III (E. coli)	Fiber	-0.01625	0.013313	0.222911	0.714088
PWY-3001 Superpathway of L-isoleucine biosynthesis I	Sodium	-0.01446	0.012331	0.241466	0.716481
PWY66-409 Superpathway of purine nucleotide salvage	Proteins	0.03744	0.030271	0.216773	0.719336
PWY-5103 L-isoleucine biosynthesis III	Carbohydrates	-0.01861	0.016443	0.258276	0.720866
PWY-7456 β-1,4-mannan degradation	Sugar	-0.02047	0.019629	0.297513	0.721047
PWY-6123 Inosine-5′-phosphate biosynthesis I	Fats	-0.01683	0.013408	0.21003	0.721764
COA-PWY Coenzyme A biosynthesis I (prokaryotic)	Sodium	-0.01395	0.01207	0.24831	0.722155
PWY-5505 L-glutamate and L-glutamine biosynthesis	Fats	0.032055	0.025871	0.21595	0.723091
PWY4FS-7 Phosphatidylglycerol biosynthesis I (plastidic)	Sugar	-0.02208	0.021386	0.302279	0.726261
PWY4FS-8 Phosphatidylglycerol biosynthesis II (non-plastidic)	Sugar	-0.02208	0.021386	0.302282	0.726261
PWY-5686 UMP biosynthesis I	Sugar	-0.01455	0.0143	0.309313	0.726692
PWY-7790 UMP biosynthesis II	Sugar	-0.01455	0.0143	0.309313	0.726692
PWY-7791 UMP biosynthesis III	Sugar	-0.01455	0.0143	0.309313	0.726692
PWY-7220 Adenosine deoxyribonucleotides de novo biosynthesis II	Calories	-0.02565	0.020784	0.217843	0.727234
PWY-7222 Guanosine deoxyribonucleotides de novo biosynthesis II	Calories	-0.02565	0.020784	0.217843	0.727234
PANTOSYN-PWY Superpathway of coenzyme A biosynthesis I (bacteria)	Sodium	-0.01353	0.011826	0.253205	0.72743
PWY-7851 Coenzyme A biosynthesis II (eukaryotic)	Sodium	-0.01381	0.012043	0.252182	0.72743
GALACTUROCAT-PWY D-galacturonate degradation I	Sodium	-0.02096	0.018427	0.256077	0.727442
HISTSYN-PWY L-histidine biosynthesis	Sodium	-0.01334	0.01185	0.26094	0.727442
THISYN-PWY Superpathway of thiamine diphosphate biosynthesis I	Sodium	-0.0188	0.016658	0.259666	0.727442
PWY-7197 Pyrimidine deoxyribonucleotide phosphorylation	Carbohydrates	-0.02065	0.018505	0.265126	0.727539
PWY-7282 4-amino-2-methyl-5-diphosphomethylpyrimidine biosynthesis II	Fats	0.025319	0.020533	0.218149	0.728258
PWY-7221 Guanosine ribonucleotides de novo biosynthesis	Sugar	-0.0148	0.014636	0.312483	0.72869
PWY-5973 cis-vaccenate biosynthesis	Sodium	-0.01583	0.014139	0.263478	0.728945
PWY-6305 Superpathway of putrescine biosynthesis	Fiber	-0.02798	0.023767	0.239756	0.729122
PWY-7198 Pyrimidine deoxyribonucleotides de novo biosynthesis IV	Sugar	-0.02664	0.026421	0.313914	0.729361
PWY-8004 Entner–Doudoroff pathway I	Sugar	-0.01971	0.019552	0.313822	0.729361
PWY-6700 Queuosine biosynthesis I (de novo)	Cholesterol	-0.01388	0.01235	0.261657	0.729878
PWY-6527 Stachyose degradation	Calories	0.023613	0.019339	0.222699	0.732429
ARGININE-SYN4-PWY L-ornithine biosynthesis II	Cholesterol	-0.02305	0.021082	0.274955	0.732634
PWY-2942 L-lysine biosynthesis III	Cholesterol	-0.01317	0.011883	0.268499	0.732634
PWY-7199 Pyrimidine deoxyribonucleosides salvage	Cholesterol	-0.01463	0.013409	0.275775	0.732634
PWY0-162 Superpathway of pyrimidine ribonucleotides de novo biosynthesis	Cholesterol	-0.01732	0.015644	0.268866	0.732634
PWY-6628 Superpathway of L-phenylalanine biosynthesis	Sugar	-0.02059	0.020674	0.319853	0.732791
PWY-7229 Superpathway of adenosine nucleotides de novo biosynthesis I	Calories	-0.01934	0.015947	0.225791	0.734981
X1CMET2-PWY Folate transformations III (E. coli)	Sodium	-0.01318	0.011972	0.271622	0.736044
PWY-7851 Coenzyme A biosynthesis II (eukaryotic)	Cholesterol	-0.01269	0.011866	0.28556	0.739115
COMPLETE-ARO-PWY Superpathway of aromatic amino acid biosynthesis	Sodium	-0.01288	0.011803	0.275723	0.740372
GLUCOSE1PMETAB-PWY Glucose and glucose-1-phosphate degradation	Sodium	-0.03398	0.031117	0.275451	0.740372
PWY-6121 5-aminoimidazole ribonucleotide biosynthesis I	Sodium	-0.01291	0.011889	0.27814	0.740372
METH-ACETATE-PWY Methanogenesis from acetate	Cholesterol	0.023279	0.021865	0.287607	0.741017
PWY-6121 5-aminoimidazole ribonucleotide biosynthesis I	Fiber	-0.01519	0.013247	0.251999	0.74124
PWY-7242 D-fructuronate degradation	Fiber	-0.02465	0.021758	0.257837	0.74124
PWY-7228 Superpathway of guanosine nucleotides de novo biosynthesis I	Calories	-0.02166	0.018043	0.230632	0.742032
PYRIDOXSYN-PWY Pyridoxal 5′-phosphate biosynthesis I	Fiber	-0.03295	0.029341	0.262108	0.742194
COBALSYN-PWY Superpathway of adenosylcobalamin salvage from cobinamide I	Sodium	-0.01523	0.01417	0.282918	0.742467
PWY-5695 Inosine-5′-phosphate degradation	Sodium	-0.01299	0.012082	0.283043	0.742467
PWY-6125 Superpathway of guanosine nucleotides de novo biosynthesis II	Calories	-0.02232	0.018948	0.239466	0.742479
FERMENTATION-PWY Mixed-acid fermentation	Calories	0.028858	0.024578	0.240949	0.743959
PWY-7199 Pyrimidine deoxyribonucleosides salvage	Fiber	-0.01709	0.015259	0.263405	0.744916
BIOTIN-BIOSYNTHESIS-PWY Biotin biosynthesis I	Sugar	-0.02556	0.026372	0.332914	0.745781
PWY-1269 CMP-3-deoxy-D-manno-octulosonate biosynthesis	Sugar	-0.02418	0.025016	0.334332	0.74581
PWY-6126 Superpathway of adenosine nucleotides de novo biosynthesis II	Calories	-0.02062	0.017661	0.243679	0.746202
PWY-6507 4-deoxy-L-threo-hex-4-enopyranuronate degradation	Calories	-0.02649	0.022767	0.245222	0.746202
PWY-841 Superpathway of purine nucleotides de novo biosynthesis I	Calories	-0.01802	0.015431	0.243457	0.746202
THISYN-PWY Superpathway of thiamine diphosphate biosynthesis I	Calories	-0.0223	0.019237	0.247145	0.747329
PWY-5484 Glycolysis II (from fructose-6-phosphate)	Calories	-0.02299	0.019987	0.250623	0.747745
PWY-7208 Superpathway of pyrimidine nucleobase salvage	Sugar	-0.01514	0.015835	0.339483	0.747955
PWY-2942 L-lysine biosynthesis III	Sodium	-0.01278	0.012073	0.290316	0.748279
PWY-6895 Superpathway of thiamine diphosphate biosynthesis II	Sodium	0.032507	0.030616	0.288906	0.748279
PWY-6317 D-galactose degradation I (Leloir pathway)	Sugar	-0.01486	0.015623	0.342168	0.748585
PWY-7237 Myo-, chiro-, and scyllo-inositol degradation	Sugar	-0.0165	0.017366	0.342663	0.748585
DAPLYSINESYN-PWY L-lysine biosynthesis I	Fiber	0.038996	0.035324	0.270191	0.75244
PWY-5030 L-histidine degradation III	Fiber	-0.03121	0.028231	0.26947	0.75244
PWY-6703 preQ₀ biosynthesis	Carbohydrates	-0.01771	0.016721	0.289979	0.752928
PWY-6386 UDP-N-acetylmuramoyl-pentapeptide biosynthesis II (lysine-containing)	Sugar	-0.0136	0.014512	0.349335	0.753291
PWY-7242 D-fructuronate degradation	Sodium	-0.02022	0.019372	0.297138	0.754744
FERMENTATION-PWY Mixed-acid fermentation	Sodium	-0.01936	0.018571	0.297864	0.75486
PWY-6292 Superpathway of L-cysteine biosynthesis (mammalian)	Sugar	-0.02082	0.02238	0.35279	0.754871
PWY-6387 UDP-N-acetylmuramoyl-pentapeptide biosynthesis I (meso-diaminopimelate-containing)	Sugar	-0.01353	0.014558	0.353293	0.754871
PWY-8178 Pentose phosphate pathway, non-oxidative branch II	Cholesterol	0.014626	0.014008	0.297029	0.75533
PWY-7220 Adenosine deoxyribonucleotides de novo biosynthesis II	Sodium	-0.01754	0.01686	0.298842	0.755614
PWY-7222 Guanosine deoxyribonucleotides de novo biosynthesis II	Sodium	-0.01754	0.01686	0.298842	0.755614
PYRIDNUCSYN-PWY NAD de novo biosynthesis I (from aspartate)	Proteins	-0.01507	0.013278	0.257038	0.756871
COA-PWY-1 Superpathway of coenzyme A biosynthesis III (mammals)	Cholesterol	-0.01218	0.011827	0.303652	0.756993
PWY-7392 Taxadiene biosynthesis (engineered)	Proteins	0.030361	0.026877	0.259238	0.757247
GALACTUROCAT-PWY D-galacturonate degradation I	Proteins	-0.02401	0.021284	0.259811	0.757924
GLYCOLYSIS-PWY Glycolysis I (from glucose-6-phosphate)	Calories	-0.02202	0.019964	0.270755	0.759378
PWY-6507 4-deoxy-L-threo-hex-4-enopyranuronate degradation	Carbohydrates	-0.02398	0.022987	0.297394	0.75974
UDPNAGSYN-PWY UDP-N-acetyl-D-glucosamine biosynthesis I	Fiber	0.022678	0.020989	0.280521	0.760386
GLUCONEO-PWY Gluconeogenesis I	Sodium	-0.01778	0.017245	0.302999	0.7606
GLUCUROCAT-PWY Superpathway of β-D-glucuronoside degradation	Sodium	-0.01939	0.018816	0.303212	0.7606
THISYN-PWY Superpathway of thiamine diphosphate biosynthesis I	Fiber	-0.01975	0.018313	0.281417	0.760958
ARO-PWY Chorismate biosynthesis I	Sodium	-0.01212	0.011792	0.304385	0.760972
PWY-3841 Folate transformations II (plants)	Sodium	-0.01273	0.012367	0.303875	0.760972
PWY-5154 L-arginine biosynthesis III (via N-acetyl-L-citrulline)	Sodium	-0.01671	0.016316	0.306447	0.761202
PWY-7242 D-fructuronate degradation	Carbohydrates	-0.02462	0.023754	0.300478	0.762355
PANTO-PWY Phosphopantothenate biosynthesis I	Carbohydrates	-0.01483	0.014327	0.301339	0.762798
METH-ACETATE-PWY Methanogenesis from acetate	Sugar	-0.0231	0.025414	0.363882	0.763393
PWY-7761 NAD salvage pathway II (PNC IV cycle)	Sugar	-0.02721	0.02994	0.363859	0.763393
FERMENTATION-PWY Mixed-acid fermentation	Carbohydrates	0.025535	0.024791	0.30354	0.764218
PWY-7345 Superpathway of anaerobic sucrose degradation	Sugar	-0.01624	0.017954	0.366165	0.76471
ANAEROFRUCAT-PWY Homolactic fermentation	Calories	-0.01948	0.017853	0.275798	0.764938
PWY-5030 L-histidine degradation III	Calories	-0.03361	0.030919	0.27764	0.764938
PWY66-399 Gluconeogenesis III	Sodium	-0.02253	0.022397	0.315075	0.765861
PWY-5695 Inosine-5′-phosphate degradation	Carbohydrates	-0.01487	0.014502	0.305859	0.766373
PWY-6385 Peptidoglycan biosynthesis III (mycobacteria)	Sugar	-0.01295	0.014426	0.36971	0.766686
TRNA-CHARGING-PWY tRNA charging	Sugar	-0.01303	0.014539	0.370432	0.766686
PANTOSYN-PWY Superpathway of coenzyme A biosynthesis I (bacteria)	Carbohydrates	-0.01443	0.014121	0.307313	0.767417
PWY-7197 Pyrimidine deoxyribonucleotide phosphorylation	Sugar	-0.01568	0.017569	0.372615	0.768065
PWY-7400 L-arginine biosynthesis IV (archaebacteria)	Sodium	-0.01455	0.014567	0.318279	0.768857
PWY-6519 8-amino-7-oxononanoate biosynthesis I	Sugar	-0.0246	0.027744	0.375744	0.769067
PWY-7357 Thiamine phosphate formation from pyrithiamine and oxythiamine (yeast)	Sugar	-0.0137	0.01542	0.374849	0.769067
PWY-8178 Pentose phosphate pathway, non-oxidative branch II	Sugar	-0.01472	0.016595	0.375548	0.769067
PANTO-PWY Phosphopantothenate biosynthesis I	Sodium	-0.01192	0.011956	0.31941	0.769912
POLYISOPRENSYN-PWY Polyisoprenoid biosynthesis (E. coli)	Calories	0.029522	0.027459	0.282878	0.770539
CITRULBIO-PWY L-citrulline biosynthesis	Sodium	-0.01848	0.01874	0.324747	0.771577
PWY-7234 Inosine-5′-phosphate biosynthesis III	Sodium	-0.01936	0.019556	0.322781	0.771577
PWY-7977 L-methionine biosynthesis IV	Sodium	-0.01237	0.012469	0.321565	0.771577
SER-GLYSYN-PWY Superpathway of L-serine and glycine biosynthesis I	Fats	-0.01623	0.014562	0.265493	0.771658
PWY-8187 L-arginine degradation XIII (reductive Stickland reaction)	Fiber	-0.02319	0.022044	0.293273	0.774005
PANTO-PWY Phosphopantothenate biosynthesis I	Fiber	-0.01393	0.013296	0.29521	0.774664
UDPNAGSYN-PWY UDP-N-acetyl-D-glucosamine biosynthesis I	Proteins	0.023233	0.021309	0.276162	0.775068
BIOTIN-BIOSYNTHESIS-PWY Biotin biosynthesis I	Cholesterol	-0.02198	0.021963	0.31754	0.77551
PWY-6147 6-hydroxymethyl-dihydropterin diphosphate biosynthesis I	Calories	-0.02433	0.022912	0.28876	0.77567
PWY-7117 C4 photosynthetic carbon assimilation cycle (PEPCK type)	Calories	0.048595	0.045821	0.289446	0.77567
ANAGLYCOLYSIS-PWY Glycolysis III (from glucose)	Sodium	-0.0114	0.011917	0.3392	0.777123
PENTOSE-P-PWY Pentose phosphate pathway	Sodium	-0.01355	0.013928	0.331057	0.777123
PWY-6163 Chorismate biosynthesis from 3-dehydroquinate	Sodium	-0.01129	0.011925	0.34429	0.777123
PWY-7357 Thiamine phosphate formation from pyrithiamine and oxythiamine (yeast)	Sodium	-0.01264	0.013221	0.339459	0.777123
PWY-7761 NAD salvage pathway II (PNC IV cycle)	Cholesterol	-0.02398	0.024189	0.322153	0.77781
PWY-6906 Chitin derivatives degradation	Cholesterol	-0.03166	0.032007	0.323243	0.778053
PWY-7238 Sucrose biosynthesis II	Sodium	-0.01202	0.012749	0.34635	0.778237
PEPTIDOGLYCANSYN-PWY Peptidoglycan biosynthesis I (meso-diaminopimelate-containing)	Sugar	-0.01275	0.014627	0.384019	0.778549
BRANCHED-CHAIN-AA-SYN-PWY Superpathway of branched-chain amino acid biosynthesis	Carbohydrates	-0.01553	0.015605	0.320317	0.77901
DTDPRHAMSYN-PWY dTDP-β-L-rhamnose biosynthesis	Cholesterol	-0.01265	0.012891	0.326962	0.779335
PWY-6892 Thiazole component of thiamine diphosphate biosynthesis I	Sodium	-0.01396	0.014881	0.348704	0.779581
PWY-6305 Superpathway of putrescine biosynthesis	Carbohydrates	-0.02607	0.026411	0.324107	0.7799
PWY-6906 Chitin derivatives degradation	Carbohydrates	-0.04207	0.04254	0.323208	0.7799
P41-PWY Pyruvate fermentation to acetate and S-lactate I	Sugar	-0.01778	0.020536	0.386935	0.780655
PWY-7199 Pyrimidine deoxyribonucleosides salvage	Carbohydrates	-0.01627	0.016561	0.326554	0.781197
PWY-724 Superpathway of L-lysine, L-threonine, and L-methionine biosynthesis II	Fiber	-0.01351	0.013011	0.299691	0.781974
PWY-621 Sucrose degradation III (sucrose invertase)	Fiber	0.018799	0.018243	0.303338	0.782127
PWY-6507 4-deoxy-L-threo-hex-4-enopyranuronate degradation	Fiber	-0.02117	0.020545	0.303278	0.782127
NONMEVIPP-PWY Methylerythritol phosphate pathway I	Sodium	-0.01117	0.012103	0.356528	0.782159
GLCMANNANAUT-PWY Superpathway of N-acetylglucosamine, N-acetylmannosamine, and N-acetylneuraminate degradation	Proteins	0.019074	0.01793	0.287977	0.784108
PWY-4984 Urea cycle	Calories	-0.02762	0.026517	0.298203	0.785302
PWY-5971 Palmitate biosynthesis (type II fatty acid synthase)	Calories	-0.0285	0.027479	0.300292	0.785485
PWY0-162 Superpathway of pyrimidine ribonucleotides de novo biosynthesis	Carbohydrates	-0.01961	0.020309	0.334642	0.787838
PWY-5973 cis-vaccenate biosynthesis	Fats	-0.01702	0.015862	0.283904	0.787942
PWY-5989 Stearate biosynthesis II (bacteria and plants)	Fats	0.030494	0.02839	0.283322	0.787942
PWY-5030 L-histidine degradation III	Cholesterol	-0.0234	0.024338	0.336834	0.789048
PWY-7953 UDP-N-acetylmuramoyl-pentapeptide biosynthesis III (meso-diaminopimelate-containing)	Sugar	-0.01224	0.014466	0.397722	0.789363
PWY0-862 5Z-dodecenoate biosynthesis I	Fats	0.03112	0.029164	0.286495	0.789927
GLYCOLYSIS-ED-PWY Superpathway of glycolysis and the Entner–Doudoroff pathway	Cholesterol	-0.01524	0.015932	0.339281	0.79035
PWY-I9 L-cysteine biosynthesis VI (from L-methionine)	Cholesterol	0.029912	0.031267	0.339267	0.79035
PWY-5100 Pyruvate fermentation to acetate and lactate II	Sugar	-0.01694	0.020079	0.399239	0.790643
PWY-2942 L-lysine biosynthesis III	Fiber	-0.01341	0.013446	0.319252	0.790924
PWY-7208 Superpathway of pyrimidine nucleobase salvage	Fiber	-0.01532	0.01543	0.321339	0.790924
PWY-7977 L-methionine biosynthesis IV	Fiber	-0.01403	0.014042	0.318229	0.790924
PWY-8187 L-arginine degradation XIII (reductive Stickland reaction)	Proteins	0.023093	0.022266	0.300189	0.792414
THISYNARA-PWY Superpathway of thiamine diphosphate biosynthesis III (eukaryotes)	Fats	0.017983	0.017017	0.291165	0.793182
PWY-5971 Palmitate biosynthesis (type II fatty acid synthase)	Sodium	-0.02083	0.022959	0.364669	0.793818
GALACTUROCAT-PWY D-galacturonate degradation I	Calories	-0.02338	0.023213	0.314283	0.794303
PWY-6703 preQ₀ biosynthesis	Calories	-0.01672	0.016553	0.312967	0.794303
UDPNAGSYN-PWY UDP-N-acetyl-D-glucosamine biosynthesis I	Calories	0.023677	0.023497	0.314144	0.794303
ARGSYN-PWY L-arginine biosynthesis I (via L-ornithine)	Sodium	-0.01241	0.013712	0.365956	0.794837
P41-PWY Pyruvate fermentation to acetate and S-lactate I	Sodium	-0.01602	0.017711	0.366269	0.794837
PWY-6353 Purine nucleotides degradation II (aerobic)	Proteins	0.02341	0.022698	0.302895	0.795446
COA-PWY-1 Superpathway of coenzyme A biosynthesis III (mammals)	Carbohydrates	-0.01348	0.01435	0.347967	0.795572
ILEUSYN-PWY L-isoleucine biosynthesis I (from threonine)	Carbohydrates	-0.01469	0.015743	0.351361	0.795572
ARGSYNBSUB-PWY L-arginine biosynthesis II (acetyl cycle)	Sodium	-0.01278	0.014232	0.36957	0.796216
PWY-5100 Pyruvate fermentation to acetate and lactate II	Fats	0.020814	0.020028	0.299243	0.796545
P41-PWY Pyruvate fermentation to acetate and S-lactate I	Fats	0.021137	0.020466	0.302218	0.798702
PWY-621 Sucrose degradation III (sucrose invertase)	Fats	0.019498	0.018892	0.302573	0.798702
PWY-7197 Pyrimidine deoxyribonucleotide phosphorylation	Fiber	-0.01658	0.017091	0.3326	0.799105
FASYN-ELONG-PWY Fatty acid elongation (saturated)	Cholesterol	-0.02213	0.023619	0.349352	0.800442
COA-PWY-1 Superpathway of coenzyme A biosynthesis III (mammals)	Fiber	-0.01286	0.013334	0.335278	0.801202
PWY-6353 Purine nucleotides degradation II (aerobic)	Fats	0.023596	0.023068	0.306876	0.801488
PWY-6121 5-aminoimidazole ribonucleotide biosynthesis I	Carbohydrates	-0.01313	0.014315	0.359356	0.801919
PWY-6270 Isoprene biosynthesis I	Carbohydrates	-0.01386	0.01515	0.360793	0.80314
PWY-6519 8-amino-7-oxononanoate biosynthesis I	Fats	0.028251	0.027767	0.309465	0.804463
PWY-6901 Superpathway of glucose and xylose degradation	Calories	-0.01483	0.015017	0.324117	0.804583
ANAEROFRUCAT-PWY Homolactic fermentation	Sugar	-0.01414	0.017178	0.41074	0.805515
PWY-7977 L-methionine biosynthesis IV	Calories	-0.01489	0.015213	0.328253	0.806087
PWY-5667 CDP-diacylglycerol biosynthesis I	Sodium	-0.00996	0.011396	0.382444	0.806301
PWY0-1319 CDP-diacylglycerol biosynthesis II	Sodium	-0.00996	0.011396	0.382448	0.806301
TRNA-CHARGING-PWY tRNA charging	Cholesterol	-0.01109	0.012177	0.362886	0.806935
PWY-4984 Urea cycle	Proteins	-0.02395	0.023892	0.316649	0.807372
PANTO-PWY Phosphopantothenate biosynthesis I	Proteins	-0.01336	0.013404	0.319443	0.807703
NAGLIPASYN-PWY Lipid IVA biosynthesis (E. coli)	Carbohydrates	-0.02888	0.031935	0.366247	0.809023
PWY-8073 Lipid IVA biosynthesis (Pseudomonas putida)	Carbohydrates	-0.02888	0.031935	0.366247	0.809023
DAPLYSINESYN-PWY L-lysine biosynthesis I	Cholesterol	0.027366	0.030461	0.369499	0.809316
PWY-702 L-methionine biosynthesis II	Cholesterol	0.022617	0.025281	0.371466	0.809316
PWY0-1479 tRNA processing	Cholesterol	0.017966	0.020311	0.376952	0.809316
PWY-7197 Pyrimidine deoxyribonucleotide phosphorylation	Calories	-0.01779	0.018319	0.332011	0.809855
PWY-5121 Superpathway of geranylgeranyl diphosphate biosynthesis II (via MEP)	Fats	0.021275	0.021233	0.316885	0.809932
PWY-5188 Tetrapyrrole biosynthesis I (from glutamate)	Fats	0.020196	0.02039	0.322437	0.81032
PWY-6527 Stachyose degradation	Fats	0.01802	0.018135	0.320904	0.81032
PWY-7234 Inosine-5′-phosphate biosynthesis III	Fats	0.023243	0.023601	0.325244	0.810438
PWY-7400 L-arginine biosynthesis IV (archaebacteria)	Fats	0.016335	0.016612	0.325941	0.810438
PWY-7977 L-methionine biosynthesis IV	Cholesterol	-0.01078	0.012222	0.378437	0.810825
PWY0-1296 Purine ribonucleosides degradation	Sugar	-0.01297	0.016116	0.421158	0.810902
PANTOSYN-PWY Superpathway of coenzyme A biosynthesis I (bacteria)	Fiber	-0.01242	0.013135	0.344896	0.81195
PWY-7198 Pyrimidine deoxyribonucleotides de novo biosynthesis IV	Fats	-0.02581	0.026311	0.327093	0.812152
PWY66-399 Gluconeogenesis III	Fats	-0.02533	0.025933	0.329251	0.812152
PWY-6969 TCA cycle V (2-oxoglutarate synthase)	Fats	-0.02153	0.022084	0.330149	0.812547
PWY-7323 Superpathway of GDP-mannose-derived O-antigen building block biosynthesis	Fats	0.016939	0.01739	0.330509	0.812547
PWY-5667 CDP-diacylglycerol biosynthesis I	Carbohydrates	-0.0122	0.013669	0.372656	0.81262
PWY0-1319 CDP-diacylglycerol biosynthesis II	Carbohydrates	-0.0122	0.013669	0.372559	0.81262
PWY-6147 6-hydroxymethyl-dihydropterin diphosphate biosynthesis I	Sodium	-0.01595	0.018637	0.392514	0.815837
PWY-6317 D-galactose degradation I (Leloir pathway)	Cholesterol	0.011503	0.013245	0.385597	0.816359
PWY-6892 Thiazole component of thiamine diphosphate biosynthesis I	Cholesterol	-0.01272	0.014626	0.385004	0.816359
BIOTIN-BIOSYNTHESIS-PWY Biotin biosynthesis I	Fats	0.025537	0.026383	0.333566	0.816937
POLYISOPRENSYN-PWY Polyisoprenoid biosynthesis (E. coli)	Fats	0.02503	0.02587	0.333766	0.816937
PWY-702 L-methionine biosynthesis II	Sodium	-0.02189	0.025704	0.394947	0.817292
PWY66-429 Fatty acid biosynthesis initiation (mitochondria)	Carbohydrates	-0.01184	0.013465	0.379888	0.818787
RHAMCAT-PWY L-rhamnose degradation I	Carbohydrates	-0.01542	0.017525	0.3794	0.818787
PWY-7117 C4 photosynthetic carbon assimilation cycle (PEPCK type)	Proteins	0.041252	0.042291	0.329854	0.819101
PWY-6151 S-adenosyl-L-methionine salvage I	Sodium	-0.01044	0.012316	0.397223	0.819161
X1CMET2-PWY Folate transformations III (E. coli)	Calories	-0.01334	0.014204	0.348021	0.819646
PWY0-1586 Peptidoglycan maturation (meso-diaminopimelate-containing)	Calories	-0.01529	0.016266	0.347752	0.819646
PWY-6700 Queuosine biosynthesis I (de novo)	Sugar	-0.01161	0.014664	0.428739	0.820518
PWY-6519 8-amino-7-oxononanoate biosynthesis I	Cholesterol	-0.01982	0.023041	0.390117	0.821689
NONMEVIPP-PWY Methylerythritol phosphate pathway I	Cholesterol	-0.01018	0.011897	0.392792	0.82215
PWY-7208 Superpathway of pyrimidine nucleobase salvage	Cholesterol	-0.01173	0.013839	0.397002	0.82215
PWY-7221 Guanosine ribonucleotides de novo biosynthesis	Cholesterol	-0.01041	0.012263	0.396497	0.82215
PWY-7392 Taxadiene biosynthesis (engineered)	Cholesterol	-0.01897	0.022357	0.396705	0.82215
PWY-6897 Thiamine diphosphate salvage II	Cholesterol	-0.01122	0.013302	0.399373	0.822393
PWY-7664 Oleate biosynthesis IV (anaerobic)	Cholesterol	-0.02028	0.023951	0.397622	0.822393
PWY-7117 C4 photosynthetic carbon assimilation cycle (PEPCK type)	Carbohydrates	0.040276	0.046268	0.384482	0.822632
PYRIDOXSYN-PWY Pyridoxal 5′-phosphate biosynthesis I	Calories	-0.03025	0.03274	0.355973	0.824045
HSERMETANA-PWY L-methionine biosynthesis III	Fats	0.016354	0.017325	0.345664	0.82436
PWY-6282 Palmitoleate biosynthesis I (from 5Z-dodec-5-enoate)	Fats	0.027222	0.029264	0.352726	0.82436
THRESYN-PWY Superpathway of L-threonine biosynthesis	Fats	-0.01264	0.013495	0.349476	0.82436
UDPNAGSYN-PWY UDP-N-acetyl-D-glucosamine biosynthesis I	Fats	0.020314	0.021821	0.352356	0.82436
PWY-4984 Urea cycle	Fiber	-0.0217	0.023521	0.356629	0.824765
PWY-7234 Inosine-5′-phosphate biosynthesis III	Fiber	-0.02096	0.02265	0.355212	0.824765
PWY-6385 Peptidoglycan biosynthesis III (mycobacteria)	Cholesterol	-0.0101	0.012162	0.406738	0.826358
ARG-POLYAMINE-SYN-PWY Superpathway of arginine and polyamine biosynthesis	Fats	0.028257	0.030729	0.35828	0.826668
PWY-5384 Sucrose degradation IV (sucrose phosphorylase)	Fiber	0.016247	0.017892	0.364308	0.827218
PWY0-845 Superpathway of pyridoxal 5′-phosphate biosynthesis and salvage	Fiber	-0.02419	0.026805	0.367333	0.827218
PWY-4041 γ-glutamyl cycle	Fiber	0.022528	0.025321	0.374074	0.828375
PWY-6936 Seleno-amino acid biosynthesis (plants)	Sugar	-0.01651	0.021322	0.439146	0.830371
PWY-7664 Oleate biosynthesis IV (anaerobic)	Fats	0.026189	0.028933	0.365853	0.830918
PWY-7400 L-arginine biosynthesis IV (archaebacteria)	Sugar	-0.01287	0.016723	0.442008	0.830984
PWY-7242 D-fructuronate degradation	Proteins	-0.02089	0.021981	0.342466	0.831448
PANTO-PWY Phosphopantothenate biosynthesis I	Calories	-0.01273	0.014181	0.370029	0.831471
PENTOSE-P-PWY Pentose phosphate pathway	Calories	-0.01477	0.016476	0.370447	0.831471
PANTOSYN-PWY Superpathway of coenzyme A biosynthesis I (bacteria)	Proteins	-0.01248	0.013236	0.346323	0.831473
PWY-7323 Superpathway of GDP-mannose-derived O-antigen building block biosynthesis	Proteins	0.016156	0.017128	0.346016	0.831473
PWY0-1261 Anhydromuropeptides recycling I	Proteins	0.022481	0.023778	0.344906	0.831473
THRESYN-PWY Superpathway of L-threonine biosynthesis	Proteins	-0.01261	0.013363	0.346012	0.831473
HISDEG-PWY L-histidine degradation I	Proteins	-0.02253	0.024385	0.356009	0.831947
PWY-6703 preQ₀ biosynthesis	Proteins	-0.01448	0.015431	0.34841	0.831947
PWY-5100 Pyruvate fermentation to acetate and lactate II	Sodium	-0.0141	0.017263	0.414453	0.832387
PWY-7953 UDP-N-acetylmuramoyl-pentapeptide biosynthesis III (meso-diaminopimelate-containing)	Cholesterol	-0.01001	0.012189	0.412042	0.832945
PWY-7761 NAD salvage pathway II (PNC IV cycle)	Proteins	0.027055	0.029389	0.357777	0.834312
PWY-6969 TCA cycle V (2-oxoglutarate synthase)	Sugar	-0.01647	0.021957	0.453474	0.834487
GLYCOGENSYNTH-PWY Glycogen biosynthesis I (from ADP-D-glucose)	Sugar	-0.01163	0.015644	0.457588	0.834713
PWY-7392 Taxadiene biosynthesis (engineered)	Fats	0.024442	0.027539	0.375248	0.83472
SER-GLYSYN-PWY Superpathway of L-serine and glycine biosynthesis I	Proteins	-0.01318	0.014413	0.360949	0.834886
PWY-7357 Thiamine phosphate formation from pyrithiamine and oxythiamine (yeast)	Fats	0.01363	0.015403	0.376675	0.83622
PWY-5695 Inosine-5′-phosphate degradation	Cholesterol	-0.00968	0.011899	0.416323	0.836413
PWY-5989 Stearate biosynthesis II (bacteria and plants)	Sugar	-0.02099	0.028343	0.459385	0.836732
PWY-2941 L-lysine biosynthesis II	Calories	-0.01905	0.021623	0.378691	0.837231
PWY-6936 Seleno-amino acid biosynthesis (plants)	Calories	0.020039	0.02267	0.37719	0.837231
PWY-6470 Peptidoglycan biosynthesis V (β-lactam resistance)	Proteins	0.024924	0.027867	0.371576	0.837265
PWY-8187 L-arginine degradation XIII (reductive Stickland reaction)	Sugar	-0.01662	0.0227	0.464465	0.837439
GLYCOGENSYNTH-PWY Glycogen biosynthesis I (from ADP-D-glucose)	Sodium	-0.01095	0.013605	0.421397	0.837563
METH-ACETATE-PWY Methanogenesis from acetate	Sodium	-0.01783	0.022193	0.422103	0.837563
PWY66-429 Fatty acid biosynthesis initiation (mitochondria)	Sodium	-0.00923	0.011525	0.423617	0.837957
PWY-724 Superpathway of L-lysine, L-threonine, and L-methionine biosynthesis II	Calories	-0.0121	0.013784	0.380484	0.837972
PWY-6305 Superpathway of putrescine biosynthesis	Calories	-0.02286	0.026166	0.382847	0.838186
PWY-6282 Palmitoleate biosynthesis I (from 5Z-dodec-5-enoate)	Cholesterol	-0.01943	0.02418	0.422147	0.838616
PWY-7456 β-1,4-mannan degradation	Proteins	0.017131	0.019277	0.374618	0.839205
PWY-5941 Glycogen degradation II	Sodium	-0.0105	0.013178	0.426031	0.839955
PWY-7199 Pyrimidine deoxyribonucleosides salvage	Sodium	-0.01083	0.013652	0.428056	0.840215
PWY-6906 Chitin derivatives degradation	Sugar	-0.02792	0.039034	0.47484	0.845344
PEPTIDOGLYCANSYN-PWY Peptidoglycan biosynthesis I (meso-diaminopimelate-containing)	Cholesterol	-0.0097	0.012286	0.430148	0.84696
PWY-6387 UDP-N-acetylmuramoyl-pentapeptide biosynthesis I (meso-diaminopimelate-containing)	Cholesterol	-0.00964	0.012243	0.431296	0.84696
FASYN-ELONG-PWY Fatty acid elongation (saturated)	Fats	0.02441	0.028499	0.392136	0.847012
PWY-4041 γ-glutamyl cycle	Calories	0.023602	0.027593	0.392814	0.847163
PWY-7208 Superpathway of pyrimidine nucleobase salvage	Calories	-0.01387	0.016305	0.395343	0.847163
PWY-6936 Seleno-amino acid biosynthesis (plants)	Fats	0.018168	0.02131	0.394333	0.848273
PYRIDNUCSYN-PWY NAD de novo biosynthesis I (from aspartate)	Fats	-0.01143	0.013391	0.393629	0.848273
PWY-6859 All-trans-farnesol biosynthesis	Fats	0.025742	0.030353	0.396824	0.849178
PHOSLIPSYN-PWY Superpathway of phospholipid biosynthesis I (bacteria)	Sodium	-0.01322	0.017085	0.439451	0.849816
TRPSYN-PWY L-tryptophan biosynthesis	Fats	0.012511	0.014861	0.400281	0.851988
PWY-6895 Superpathway of thiamine diphosphate biosynthesis II	Fats	0.029366	0.034922	0.400842	0.852365
COA-PWY Coenzyme A biosynthesis I (prokaryotic)	Carbohydrates	-0.01177	0.014504	0.417341	0.852642
PWY-3001 Superpathway of L-isoleucine biosynthesis I	Fiber	-0.01145	0.013686	0.403148	0.852844
GLUCUROCAT-PWY Superpathway of β-D-glucuronoside degradation	Proteins	-0.01803	0.021231	0.396173	0.855646
PWY-6527 Stachyose degradation	Proteins	0.015054	0.017786	0.39776	0.855646
THISYN-PWY Superpathway of thiamine diphosphate biosynthesis I	Proteins	-0.01561	0.018429	0.397306	0.855646
PWY-6897 Thiamine diphosphate salvage II	Carbohydrates	-0.01333	0.016547	0.420929	0.856226
X1CMET2-PWY Folate transformations III (E. coli)	Cholesterol	-0.00905	0.011798	0.443612	0.85683
PWY-6859 All-trans-farnesol biosynthesis	Cholesterol	-0.01891	0.024671	0.443892	0.85683
PWY-5384 Sucrose degradation IV (sucrose phosphorylase)	Sodium	-0.01189	0.01569	0.449112	0.85711
PWY-6936 Seleno-amino acid biosynthesis (plants)	Sodium	-0.0138	0.018223	0.449404	0.85711
HISDEG-PWY L-histidine degradation I	Sodium	-0.01603	0.021371	0.45365	0.857671
PWY-1042 Glycolysis IV	Sodium	-0.00927	0.01232	0.452416	0.857671
PWY-5686 UMP biosynthesis I	Sodium	-0.0092	0.012312	0.455493	0.857671
PWY-6630 Superpathway of L-tyrosine biosynthesis	Sodium	-0.01433	0.019143	0.454628	0.857671
PWY-7790 UMP biosynthesis II	Sodium	-0.0092	0.012312	0.455493	0.857671
PWY-7791 UMP biosynthesis III	Sodium	-0.0092	0.012312	0.455493	0.857671
GLUTORN-PWY L-ornithine biosynthesis I	Sugar	-0.01109	0.016076	0.490708	0.857774
PWY-6470 Peptidoglycan biosynthesis V (β-lactam resistance)	Carbohydrates	-0.02468	0.030857	0.424215	0.858028
PWY-7851 Coenzyme A biosynthesis II (eukaryotic)	Carbohydrates	-0.01156	0.014448	0.424133	0.858028
ASPASN-PWY Superpathway of L-aspartate and L-asparagine biosynthesis	Carbohydrates	-0.01435	0.017991	0.425412	0.85814
PWY-3841 Folate transformations II (plants)	Carbohydrates	-0.01217	0.015264	0.425767	0.85814
PWY-6731 Starch degradation III	Calories	-0.01663	0.020023	0.406698	0.859086
PWY-7357 Thiamine phosphate formation from pyrithiamine and oxythiamine (yeast)	Calories	0.013589	0.016341	0.40609	0.859086
PWY-6470 Peptidoglycan biosynthesis V (β-lactam resistance)	Fats	0.023615	0.028485	0.407513	0.859149
PWY-2942 L-lysine biosynthesis III	Proteins	-0.01135	0.01356	0.40289	0.859189
GLUCOSE1PMETAB-PWY Glucose and glucose-1-phosphate degradation	Carbohydrates	-0.02888	0.036406	0.428097	0.85929
GLYCOLYSIS-ED-PWY Superpathway of glycolysis and the Entner–Doudoroff pathway	Carbohydrates	-0.01602	0.020175	0.427499	0.85929
ARGININE-SYN4-PWY L-ornithine biosynthesis II	Sodium	-0.01612	0.021749	0.45897	0.859843
PWY-I9 L-cysteine biosynthesis VI (from L-methionine)	Sodium	-0.02348	0.031825	0.460967	0.860678
PWY-3001 Superpathway of L-isoleucine biosynthesis I	Cholesterol	-0.00913	0.012175	0.453504	0.861312
PWY-6386 UDP-N-acetylmuramoyl-pentapeptide biosynthesis II (lysine-containing)	Cholesterol	-0.00908	0.012201	0.45703	0.861312
PWY-6901 Superpathway of glucose and xylose degradation	Cholesterol	-0.0095	0.012789	0.458202	0.861312
UDPNAGSYN-PWY UDP-N-acetyl-D-glucosamine biosynthesis I	Cholesterol	0.013218	0.017791	0.457941	0.861312
PWY-4041 γ-glutamyl cycle	Sugar	-0.0176	0.026092	0.50019	0.86146
FASYN-ELONG-PWY Fatty acid elongation (saturated)	Sugar	-0.01912	0.028472	0.50215	0.86159
NONOXIPENT-PWY Pentose phosphate pathway, non-oxidative branch I	Sugar	-0.0118	0.017548	0.501633	0.86159
PWY-5103 L-isoleucine biosynthesis III	Cholesterol	-0.00945	0.012792	0.460436	0.863317
PWY-5097 L-lysine biosynthesis VI	Cholesterol	-0.00866	0.011996	0.470554	0.864166
PWY-5941 Glycogen degradation II	Cholesterol	0.009326	0.012929	0.471106	0.864166
PWY-5097 L-lysine biosynthesis VI	Carbohydrates	-0.01176	0.014983	0.43289	0.864223
PWY-5484 Glycolysis II (from fructose-6-phosphate)	Sugar	-0.01256	0.019114	0.511424	0.865366
DAPLYSINESYN-PWY L-lysine biosynthesis I	Sugar	-0.0238	0.036474	0.514465	0.865893
PWY-6936 Seleno-amino acid biosynthesis (plants)	Proteins	0.01721	0.020925	0.411237	0.866173
BIOTIN-BIOSYNTHESIS-PWY Biotin biosynthesis I	Sodium	-0.01634	0.022503	0.468202	0.866174
PWY-6731 Starch degradation III	Proteins	-0.01501	0.018312	0.412806	0.866598
PWY-5188 Tetrapyrrole biosynthesis I (from glutamate)	Sugar	0.013258	0.020451	0.517114	0.867064
GLYCOGENSYNTH-PWY Glycogen biosynthesis I (from ADP-D-glucose)	Fiber	0.012289	0.015217	0.41972	0.867578
PWY0-1479 tRNA processing	Sodium	0.015058	0.020835	0.470266	0.867822
PWY-5686 UMP biosynthesis I	Cholesterol	-0.00858	0.012062	0.477345	0.868228
PWY-7790 UMP biosynthesis II	Cholesterol	-0.00858	0.012062	0.477345	0.868228
PWY-7791 UMP biosynthesis III	Cholesterol	-0.00858	0.012062	0.477345	0.868228
PWY-6892 Thiazole component of thiamine diphosphate biosynthesis I	Fiber	0.013368	0.016667	0.422944	0.86853
TRPSYN-PWY L-tryptophan biosynthesis	Fiber	0.011621	0.014496	0.423155	0.86853
PWY-6608 Guanosine nucleotides degradation III	Carbohydrates	-0.01737	0.022558	0.441729	0.86859
PWY-6270 Isoprene biosynthesis I	Fiber	-0.0115	0.014404	0.425209	0.869211
TRNA-CHARGING-PWY tRNA charging	Sodium	-0.00894	0.012455	0.4733	0.86947
PWY-7456 β-1,4-mannan degradation	Calories	0.016917	0.020747	0.415274	0.869725
PWY-7345 Superpathway of anaerobic sucrose degradation	Carbohydrates	-0.01454	0.019074	0.446394	0.870821
PWY-7238 Sucrose biosynthesis II	Sugar	-0.00939	0.014774	0.525552	0.870935
PWY-7237 Myo-, chiro-, and scyllo-inositol degradation	Fiber	0.013379	0.016808	0.426487	0.871023
GLYCOCAT-PWY Glycogen degradation I	Sugar	0.019463	0.030816	0.527958	0.871027
PWY-6282 Palmitoleate biosynthesis I (from 5Z-dodec-5-enoate)	Sugar	-0.01841	0.029222	0.528987	0.871027
PWY-5989 Stearate biosynthesis II (bacteria and plants)	Cholesterol	-0.01655	0.023414	0.480173	0.871258
CITRULBIO-PWY L-citrulline biosynthesis	Cholesterol	-0.01286	0.018252	0.481623	0.871396
PWY-6317 D-galactose degradation I (Leloir pathway)	Fiber	0.012016	0.015183	0.429123	0.87274
PWY-6353 Purine nucleotides degradation II (aerobic)	Carbohydrates	0.018577	0.024664	0.451713	0.873332
PWY0-1586 Peptidoglycan maturation (meso-diaminopimelate-containing)	Cholesterol	-0.00919	0.0131	0.483597	0.873544
PANTOSYN-PWY Superpathway of coenzyme A biosynthesis I (bacteria)	Calories	-0.0113	0.013979	0.419366	0.873561
PWY-6628 Superpathway of L-phenylalanine biosynthesis	Carbohydrates	-0.01666	0.022156	0.452595	0.873705
BRANCHED-CHAIN-AA-SYN-PWY Superpathway of branched-chain amino acid biosynthesis	Cholesterol	-0.00857	0.012281	0.485712	0.874147
OANTIGEN-PWY O-antigen building blocks biosynthesis (E. coli)	Fiber	0.013961	0.017811	0.433545	0.874182
CITRULBIO-PWY L-citrulline biosynthesis	Fiber	-0.01677	0.021445	0.434668	0.874625
PWY-6353 Purine nucleotides degradation II (aerobic)	Fiber	0.01755	0.022461	0.434985	0.874625
OANTIGEN-PWY O-antigen building blocks biosynthesis (E. coli)	Fats	0.014921	0.018445	0.418953	0.875062
PWY-2942 L-lysine biosynthesis III	Calories	-0.01154	0.014361	0.421985	0.87634
PWY-7208 Superpathway of pyrimidine nucleobase salvage	Carbohydrates	-0.01213	0.016482	0.462245	0.87708
GLUTORN-PWY L-ornithine biosynthesis I	Calories	0.013636	0.017009	0.423125	0.877465
PWY-6731 Starch degradation III	Cholesterol	-0.01065	0.015414	0.49001	0.877983
COBALSYN-PWY Superpathway of adenosylcobalamin salvage from cobinamide I	Cholesterol	0.009571	0.013903	0.491548	0.878014
PWY-7664 Oleate biosynthesis IV (anaerobic)	Sugar	-0.01767	0.028902	0.541354	0.878514
PWY-5667 CDP-diacylglycerol biosynthesis I	Fiber	-0.00967	0.012682	0.446031	0.881231
PWY0-1319 CDP-diacylglycerol biosynthesis II	Fiber	-0.00967	0.012682	0.445983	0.881231
PWY-5659 GDP-mannose biosynthesis	Fats	0.013015	0.016413	0.428205	0.881431
NONMEVIPP-PWY Methylerythritol phosphate pathway I	Carbohydrates	-0.01068	0.014707	0.467958	0.882566
THISYNARA-PWY Superpathway of thiamine diphosphate biosynthesis III (eukaryotes)	Carbohydrates	-0.01327	0.018279	0.468317	0.882566
PWY-6629 Superpathway of L-tryptophan biosynthesis	Sodium	-0.00825	0.012001	0.492236	0.882783
PWY-7221 Guanosine ribonucleotides de novo biosynthesis	Sodium	-0.00851	0.012544	0.497878	0.884231
PWY0-1061 Superpathway of L-alanine biosynthesis	Fats	0.030497	0.038831	0.43263	0.884382
HSERMETANA-PWY L-methionine biosynthesis III	Calories	0.014394	0.018333	0.432791	0.884492
PWY4FS-7 Phosphatidylglycerol biosynthesis I (plastidic)	Calories	-0.01769	0.022509	0.432388	0.884492
PWY4FS-8 Phosphatidylglycerol biosynthesis II (non-plastidic)	Calories	-0.01769	0.022509	0.432394	0.884492
UDPNAGSYN-PWY UDP-N-acetyl-D-glucosamine biosynthesis I	Sugar	0.012767	0.021717	0.55691	0.886013
DAPLYSINESYN-PWY L-lysine biosynthesis I	Sodium	-0.02107	0.031178	0.499443	0.886179
PWY-5100 Pyruvate fermentation to acetate and lactate II	Calories	0.016375	0.021222	0.440726	0.887046
PWY-7242 D-fructuronate degradation	Calories	-0.01814	0.023529	0.441262	0.88732
PWY-4984 Urea cycle	Cholesterol	-0.01337	0.019773	0.499371	0.887592
HISTSYN-PWY L-histidine biosynthesis	Proteins	-0.01041	0.013395	0.437466	0.887911
PWY-3841 Folate transformations II (plants)	Proteins	-0.01088	0.014081	0.440157	0.889125
SER-GLYSYN-PWY Superpathway of L-serine and glycine biosynthesis I	Cholesterol	-0.00847	0.012641	0.503426	0.889359
PWY-5989 Stearate biosynthesis II (bacteria and plants)	Proteins	0.021415	0.027818	0.441802	0.890019
GLYCOGENSYNTH-PWY Glycogen biosynthesis I (from ADP-D-glucose)	Cholesterol	0.008906	0.013393	0.506408	0.890284
PWY-6470 Peptidoglycan biosynthesis V (β-lactam resistance)	Cholesterol	0.015291	0.02336	0.513129	0.890284
PWY-5971 Palmitate biosynthesis (type II fatty acid synthase)	Cholesterol	-0.01473	0.022589	0.514569	0.890803
PWY-2941 L-lysine biosynthesis II	Fats	-0.01561	0.020457	0.445918	0.891647
PWY-5121 Superpathway of geranylgeranyl diphosphate biosynthesis II (via MEP)	Sodium	-0.01189	0.017872	0.506159	0.891805
PWY-6703 preQ₀ biosynthesis	Fiber	-0.01126	0.01528	0.461688	0.892034
COBALSYN-PWY Superpathway of adenosylcobalamin salvage from cobinamide I	Sugar	-0.00929	0.016474	0.573014	0.892434
PWY-6527 Stachyose degradation	Sugar	-0.01025	0.01812	0.572004	0.892434
ILEUSYN-PWY L-isoleucine biosynthesis I (from threonine)	Cholesterol	-0.00798	0.012338	0.518011	0.892544
PWY-6519 8-amino-7-oxononanoate biosynthesis I	Sodium	-0.01567	0.023619	0.507393	0.893268
FASYN-ELONG-PWY Fatty acid elongation (saturated)	Sodium	-0.01602	0.024232	0.508827	0.893668
PWY-6609 Adenine and adenosine salvage III	Cholesterol	-0.00773	0.012057	0.52204	0.894235
PWY-5384 Sucrose degradation IV (sucrose phosphorylase)	Fats	0.013996	0.018505	0.449805	0.894773
GLUCONEO-PWY Gluconeogenesis I	Sugar	-0.01106	0.02012	0.582624	0.895046
PWY-6353 Purine nucleotides degradation II (aerobic)	Sugar	-0.01262	0.023139	0.585808	0.895046
DTDPRHAMSYN-PWY dTDP-β-L-rhamnose biosynthesis	Sodium	-0.00865	0.013164	0.511316	0.895913
GLYCOLYSIS-PWY Glycolysis I (from glucose-6-phosphate)	Sugar	-0.01017	0.019125	0.595241	0.896497
PWY-7761 NAD salvage pathway II (PNC IV cycle)	Calories	0.024472	0.032813	0.456164	0.896688
GLUTORN-PWY L-ornithine biosynthesis I	Sodium	-0.0089	0.013802	0.51933	0.897362
PWY-6317 D-galactose degradation I (Leloir pathway)	Sodium	-0.0087	0.013493	0.519419	0.897362
PWY-7117 C4 photosynthetic carbon assimilation cycle (PEPCK type)	Sodium	-0.02403	0.036867	0.514897	0.897362
PWY0-1261 Anhydromuropeptides recycling I	Calories	0.018676	0.025339	0.461504	0.898719
PWY-6859 All-trans-farnesol biosynthesis	Fiber	0.02118	0.029194	0.468539	0.898784
PWY-6902 Chitin degradation II (Vibrio)	Cholesterol	-0.01633	0.025813	0.527429	0.899373
VALSYN-PWY L-valine biosynthesis	Sodium	-0.00768	0.011958	0.521063	0.899451
PWY0-162 Superpathway of pyrimidine ribonucleotides de novo biosynthesis	Proteins	-0.01384	0.01849	0.454681	0.899635
PWY-5097 L-lysine biosynthesis VI	Sodium	-0.00778	0.012226	0.525015	0.901312
PWY-5505 L-glutamate and L-glutamine biosynthesis	Calories	0.019946	0.027378	0.466661	0.902428
PWY-6305 Superpathway of putrescine biosynthesis	Proteins	-0.01792	0.024076	0.457179	0.902434
ARO-PWY Chorismate biosynthesis I	Carbohydrates	-0.00951	0.014255	0.504884	0.903517
GLCMANNANAUT-PWY Superpathway of N-acetylglucosamine, N-acetylmannosamine, and N-acetylneuraminate degradation	Carbohydrates	-0.01289	0.01921	0.502728	0.903517
PWY-5154 L-arginine biosynthesis III (via N-acetyl-L-citrulline)	Calories	-0.01436	0.019838	0.469633	0.903715
PWY-6823 Molybdopterin biosynthesis	Cholesterol	0.009919	0.01611	0.538415	0.903715
DTDPRHAMSYN-PWY dTDP-β-L-rhamnose biosynthesis	Carbohydrates	-0.01058	0.016254	0.515413	0.903793
PWY-6859 All-trans-farnesol biosynthesis	Carbohydrates	-0.02153	0.033012	0.514601	0.903793
FERMENTATION-PWY Mixed-acid fermentation	Sugar	-0.01161	0.022373	0.603952	0.904096
PWY-6122 5-aminoimidazole ribonucleotide biosynthesis II	Sodium	-0.00754	0.012104	0.533721	0.904474
PWY-6277 Superpathway of 5-aminoimidazole ribonucleotide biosynthesis	Sodium	-0.00754	0.012104	0.533721	0.904474
FERMENTATION-PWY Mixed-acid fermentation	Proteins	0.016253	0.021972	0.459874	0.905071
ASPASN-PWY Superpathway of L-aspartate and L-asparagine biosynthesis	Cholesterol	-0.00855	0.014019	0.542354	0.905373
PWY-7234 Inosine-5′-phosphate biosynthesis III	Cholesterol	-0.01159	0.018984	0.54184	0.905373
GLUCOSE1PMETAB-PWY Glucose and glucose-1-phosphate degradation	Sugar	-0.01807	0.035106	0.60696	0.90553
THRESYN-PWY Superpathway of L-threonine biosynthesis	Cholesterol	-0.00707	0.011782	0.548618	0.906199
PWY-6386 UDP-N-acetylmuramoyl-pentapeptide biosynthesis II (lysine-containing)	Sodium	-0.00749	0.012465	0.548501	0.906892
PWY-6387 UDP-N-acetylmuramoyl-pentapeptide biosynthesis I (meso-diaminopimelate-containing)	Sodium	-0.00767	0.012508	0.540048	0.906892
PWY-6703 preQ₀ biosynthesis	Sodium	-0.00815	0.013566	0.548542	0.906892
PWY0-1586 Peptidoglycan maturation (meso-diaminopimelate-containing)	Sodium	-0.00802	0.013361	0.548629	0.906892
PWY-7392 Taxadiene biosynthesis (engineered)	Fiber	0.018817	0.02648	0.477714	0.907207
COLANSYN-PWY Colanic acid building blocks biosynthesis	Sodium	-0.00751	0.012911	0.561006	0.907296
PWY-6282 Palmitoleate biosynthesis I (from 5Z-dodec-5-enoate)	Sodium	-0.01471	0.024817	0.553734	0.907296
PWY-6385 Peptidoglycan biosynthesis III (mycobacteria)	Sodium	-0.00721	0.012419	0.562069	0.907296
PWY-6609 Adenine and adenosine salvage III	Sodium	-0.00713	0.012302	0.5627	0.907296
PWY-7664 Oleate biosynthesis IV (anaerobic)	Sodium	-0.01438	0.024575	0.558663	0.907296
PWY-7953 UDP-N-acetylmuramoyl-pentapeptide biosynthesis III (meso-diaminopimelate-containing)	Sodium	-0.00729	0.012448	0.558445	0.907296
PWY0-1061 Superpathway of L-alanine biosynthesis	Sodium	0.01924	0.032812	0.557945	0.907296
PWY-7282 4-amino-2-methyl-5-diphosphomethylpyrimidine biosynthesis II	Carbohydrates	-0.014	0.021932	0.523467	0.907402
PWY-7383 Anaerobic energy metabolism (invertebrates, cytosol)	Carbohydrates	0.02213	0.035118	0.528887	0.908719
GLUCOSE1PMETAB-PWY Glucose and glucose-1-phosphate degradation	Fats	0.025187	0.034689	0.468187	0.909536
PWY-6731 Starch degradation III	Fats	0.013607	0.018708	0.467382	0.909536
ARGSYN-PWY L-arginine biosynthesis I (via L-ornithine)	Sugar	-0.00795	0.015996	0.619473	0.9101
PWY4FS-7 Phosphatidylglycerol biosynthesis I (plastidic)	Sodium	-0.01048	0.018493	0.571185	0.910288
PWY4FS-8 Phosphatidylglycerol biosynthesis II (non-plastidic)	Sodium	-0.01048	0.018493	0.571184	0.910288
PWY0-162 Superpathway of pyrimidine ribonucleotides de novo biosynthesis	Fiber	-0.01284	0.018265	0.482275	0.910417
PWY-7383 Anaerobic energy metabolism (invertebrates, cytosol)	Sugar	0.015464	0.032285	0.632173	0.911314
OANTIGEN-PWY O-antigen building blocks biosynthesis (E. coli)	Calories	0.013957	0.019761	0.480362	0.911457
PWY-6168 Flavin biosynthesis III (fungi)	Carbohydrates	-0.02451	0.03972	0.537473	0.911529
PWY0-862 5Z-dodecenoate biosynthesis I	Cholesterol	-0.01407	0.024076	0.559185	0.91164
CITRULBIO-PWY L-citrulline biosynthesis	Calories	-0.01669	0.023823	0.483924	0.913061
GLUCUROCAT-PWY Superpathway of β-D-glucuronoside degradation	Calories	-0.01586	0.022595	0.483125	0.913061
PWY-7229 Superpathway of adenosine nucleotides de novo biosynthesis I	Fats	-0.01091	0.015262	0.474952	0.913307
PWY-7392 Taxadiene biosynthesis (engineered)	Carbohydrates	-0.01833	0.029971	0.541082	0.913462
PWY-6168 Flavin biosynthesis III (fungi)	Sodium	0.017658	0.032073	0.582222	0.913581
PWY-8187 L-arginine degradation XIII (reductive Stickland reaction)	Sodium	-0.01086	0.019584	0.579663	0.913581
PWY0-862 5Z-dodecenoate biosynthesis I	Sugar	-0.01347	0.029127	0.644098	0.913652
GLYCOCAT-PWY Glycogen degradation I	Calories	0.022756	0.032614	0.485707	0.913785
PWY-6507 4-deoxy-L-threo-hex-4-enopyranuronate degradation	Cholesterol	0.010134	0.017526	0.563429	0.914587
PWY-6163 Chorismate biosynthesis from 3-dehydroquinate	Carbohydrates	-0.00884	0.014555	0.544096	0.915122
PWY-6936 Seleno-amino acid biosynthesis (plants)	Cholesterol	0.010279	0.017821	0.564406	0.915252
PWY-3841 Folate transformations II (plants)	Calories	-0.01045	0.015113	0.489463	0.915426
PHOSLIPSYN-PWY Superpathway of phospholipid biosynthesis I (bacteria)	Calories	-0.01412	0.020662	0.494685	0.915639
GLUCOSE1PMETAB-PWY Glucose and glucose-1-phosphate degradation	Cholesterol	0.017493	0.030847	0.570932	0.916616
PEPTIDOGLYCANSYN-PWY Peptidoglycan biosynthesis I (meso-diaminopimelate-containing)	Sodium	-0.00674	0.012557	0.591741	0.918411
GALACTUROCAT-PWY D-galacturonate degradation I	Cholesterol	0.009896	0.017997	0.582695	0.919391
COA-PWY Coenzyme A biosynthesis I (prokaryotic)	Fiber	-0.00912	0.013449	0.49789	0.920329
PWY-7383 Anaerobic energy metabolism (invertebrates, cytosol)	Calories	0.023248	0.034797	0.504396	0.92227
PWY-6122 5-aminoimidazole ribonucleotide biosynthesis II	Carbohydrates	-0.00868	0.014915	0.560934	0.922509
PWY-6277 Superpathway of 5-aminoimidazole ribonucleotide biosynthesis	Carbohydrates	-0.00868	0.014915	0.560934	0.922509
PWY-6527 Stachyose degradation	Carbohydrates	0.01142	0.019547	0.559353	0.922509
PWY-1269 CMP-3-deoxy-D-manno-octulosonate biosynthesis	Fiber	0.016277	0.024312	0.503501	0.923016
PWY-7851 Coenzyme A biosynthesis II (eukaryotic)	Fiber	-0.00899	0.013409	0.502906	0.923016
PWY-5659 GDP-mannose biosynthesis	Proteins	0.011584	0.016154	0.473663	0.923207
PWY-5188 Tetrapyrrole biosynthesis I (from glutamate)	Cholesterol	0.009158	0.017254	0.595854	0.923366
PWY-5667 CDP-diacylglycerol biosynthesis I	Cholesterol	-0.00598	0.011232	0.594816	0.923366
PWY0-1319 CDP-diacylglycerol biosynthesis II	Cholesterol	-0.00598	0.011232	0.594752	0.923366
PWY0-845 Superpathway of pyridoxal 5′-phosphate biosynthesis and salvage	Fats	0.01939	0.027761	0.485225	0.924482
NONMEVIPP-PWY Methylerythritol phosphate pathway I	Proteins	-0.00974	0.01367	0.476346	0.924507
PWY-5989 Stearate biosynthesis II (bacteria and plants)	Sodium	-0.01252	0.024039	0.602781	0.924518
PWY-7560 Methylerythritol phosphate pathway II	Carbohydrates	-0.01015	0.017618	0.564827	0.924716
ARGSYNBSUB-PWY L-arginine biosynthesis II (acetyl cycle)	Calories	0.011505	0.017617	0.51404	0.92487
HISTSYN-PWY L-histidine biosynthesis	Calories	-0.0092	0.014277	0.519834	0.92487
PWY-5695 Inosine-5′-phosphate degradation	Calories	-0.00936	0.014362	0.514959	0.92487
PWY-7199 Pyrimidine deoxyribonucleosides salvage	Calories	-0.01077	0.016403	0.511707	0.92487
PWY0-845 Superpathway of pyridoxal 5′-phosphate biosynthesis and salvage	Calories	-0.01911	0.02975	0.520921	0.92487
GLCMANNANAUT-PWY Superpathway of N-acetylglucosamine, N-acetylmannosamine, and N-acetylneuraminate degradation	Cholesterol	0.00812	0.015764	0.606735	0.925146
PWY0-862 5Z-dodecenoate biosynthesis I	Proteins	0.020202	0.028582	0.480045	0.926696
COA-PWY-1 Superpathway of coenzyme A biosynthesis III (mammals)	Proteins	-0.00927	0.013446	0.491072	0.926729
COLANSYN-PWY Colanic acid building blocks biosynthesis	Proteins	0.009834	0.014376	0.494283	0.926729
OANTIGEN-PWY O-antigen building blocks biosynthesis (E. coli)	Proteins	0.012245	0.018063	0.498177	0.926729
PWY-5188 Tetrapyrrole biosynthesis I (from glutamate)	Proteins	0.014024	0.020073	0.485107	0.926729
PWY-724 Superpathway of L-lysine, L-threonine, and L-methionine biosynthesis II	Proteins	-0.00921	0.013112	0.482999	0.926729
GLUTORN-PWY L-ornithine biosynthesis I	Fats	0.01103	0.016049	0.492245	0.92676
PWY-7228 Superpathway of guanosine nucleotides de novo biosynthesis I	Fats	-0.01145	0.017154	0.504862	0.927126
PWY-841 Superpathway of purine nucleotides de novo biosynthesis I	Fats	-0.00988	0.014794	0.504528	0.927126
PWY-I9 L-cysteine biosynthesis VI (from L-methionine)	Fats	-0.0245	0.036464	0.501999	0.927126
PWY-5121 Superpathway of geranylgeranyl diphosphate biosynthesis II (via MEP)	Calories	0.01443	0.022806	0.527206	0.92815
PWY-6700 Queuosine biosynthesis I (de novo)	Sodium	-0.00647	0.012621	0.608451	0.928463
ARG-POLYAMINE-SYN-PWY Superpathway of arginine and polyamine biosynthesis	Sugar	-0.01258	0.030699	0.682154	0.928498
NAGLIPASYN-PWY Lipid IVA biosynthesis (E. coli)	Calories	-0.01988	0.031664	0.530309	0.928846
PWY-8073 Lipid IVA biosynthesis (Pseudomonas putida)	Calories	-0.01988	0.031664	0.530309	0.928846
ARG-POLYAMINE-SYN-PWY Superpathway of arginine and polyamine biosynthesis	Calories	0.020376	0.032852	0.535401	0.929943
COLANSYN-PWY Colanic acid building blocks biosynthesis	Fats	0.00948	0.014515	0.514024	0.929984
PWY-6305 Superpathway of putrescine biosynthesis	Fats	-0.01592	0.024555	0.517114	0.929984
PWY-7237 Myo-, chiro-, and scyllo-inositol degradation	Fats	0.0113	0.017458	0.517775	0.929984
PWY-6901 Superpathway of glucose and xylose degradation	Fiber	-0.00917	0.014257	0.520547	0.930224
PWY-7357 Thiamine phosphate formation from pyrithiamine and oxythiamine (yeast)	Fiber	0.009704	0.014973	0.517217	0.930224
COMPLETE-ARO-PWY Superpathway of aromatic amino acid biosynthesis	Carbohydrates	-0.00811	0.014293	0.57059	0.930401
PWY-6609 Adenine and adenosine salvage III	Carbohydrates	-0.00861	0.015209	0.571521	0.930401
PWY-7221 Guanosine ribonucleotides de novo biosynthesis	Carbohydrates	-0.00888	0.01569	0.571676	0.930401
PWY-7977 L-methionine biosynthesis IV	Fats	-0.00918	0.014415	0.524576	0.932638
ANAGLYCOLYSIS-PWY Glycolysis III (from glucose)	Carbohydrates	-0.00793	0.014378	0.58149	0.932737
PWY-5384 Sucrose degradation IV (sucrose phosphorylase)	Cholesterol	0.007618	0.01532	0.619284	0.933236
TRPSYN-PWY L-tryptophan biosynthesis	Calories	0.009579	0.015686	0.54171	0.935145
PENTOSE-P-PWY Pentose phosphate pathway	Cholesterol	-0.00662	0.013737	0.630184	0.935698
PWY-6121 5-aminoimidazole ribonucleotide biosynthesis I	Proteins	-0.00874	0.01337	0.513471	0.935882
P41-PWY Pyruvate fermentation to acetate and S-lactate I	Calories	0.013091	0.02164	0.545517	0.936875
GLUTORN-PWY L-ornithine biosynthesis I	Fiber	0.009621	0.015606	0.537871	0.937263
GLUCONEO-PWY Gluconeogenesis I	Cholesterol	-0.00787	0.016895	0.641465	0.938185
PWY-7111 Pyruvate fermentation to isobutanol (engineered)	Cholesterol	0.007024	0.014907	0.637762	0.938185
VALSYN-PWY L-valine biosynthesis	Cholesterol	-0.00545	0.011723	0.641948	0.938185
PWY-5659 GDP-mannose biosynthesis	Sugar	-0.00626	0.016465	0.70411	0.938385
BRANCHED-CHAIN-AA-SYN-PWY Superpathway of branched-chain amino acid biosynthesis	Sodium	-0.00547	0.012548	0.663109	0.938476
P441-PWY Superpathway of N-acetylneuraminate degradation	Sodium	-0.00996	0.021866	0.649007	0.938476
PWY-6969 TCA cycle V (2-oxoglutarate synthase)	Sodium	-0.00839	0.018439	0.64947	0.938476
PWY-7328 Superpathway of UDP-glucose-derived O-antigen building block biosynthesis	Sodium	-0.00821	0.018313	0.654014	0.938476
PWY-7383 Anaerobic energy metabolism (invertebrates, cytosol)	Sodium	-0.01208	0.027262	0.657822	0.938476
PWY-7237 Myo-, chiro-, and scyllo-inositol degradation	Cholesterol	-0.00656	0.01425	0.645755	0.93956
ARGSYNBSUB-PWY L-arginine biosynthesis II (acetyl cycle)	Sugar	-0.00597	0.016621	0.719739	0.939619
PWY-I9 L-cysteine biosynthesis VI (from L-methionine)	Sugar	-0.013	0.036677	0.723215	0.94063
COA-PWY Coenzyme A biosynthesis I (prokaryotic)	Proteins	-0.00865	0.013559	0.523902	0.940816
PWY-5103 L-isoleucine biosynthesis III	Proteins	-0.00956	0.015043	0.525386	0.940816
PWY-5154 L-arginine biosynthesis III (via N-acetyl-L-citrulline)	Proteins	-0.01167	0.018534	0.529313	0.940816
PWY-6125 Superpathway of guanosine nucleotides de novo biosynthesis II	Fats	-0.01118	0.01797	0.534197	0.941149
PWY0-1061 Superpathway of L-alanine biosynthesis	Calories	0.024165	0.041601	0.561598	0.941166
PWY0-162 Superpathway of pyrimidine ribonucleotides de novo biosynthesis	Calories	-0.01187	0.02013	0.555817	0.941166
PWY-6126 Superpathway of adenosine nucleotides de novo biosynthesis II	Fats	-0.01033	0.016805	0.53895	0.942258
PWY-7220 Adenosine deoxyribonucleotides de novo biosynthesis II	Fats	-0.01204	0.019624	0.539917	0.942258
PWY-7222 Guanosine deoxyribonucleotides de novo biosynthesis II	Fats	-0.01204	0.019624	0.539917	0.942258
PWY-702 L-methionine biosynthesis II	Sugar	-0.01018	0.029561	0.730742	0.943209
PWY-6859 All-trans-farnesol biosynthesis	Sodium	0.010647	0.025374	0.674995	0.943311
PWY-5030 L-histidine degradation III	Proteins	-0.0176	0.028589	0.538384	0.943688
PWY-6163 Chorismate biosynthesis from 3-dehydroquinate	Cholesterol	-0.00531	0.011721	0.650614	0.943863
HISTSYN-PWY L-histidine biosynthesis	Fiber	-0.00799	0.013277	0.547658	0.944251
PWY0-1586 Peptidoglycan maturation (meso-diaminopimelate-containing)	Fiber	-0.00909	0.015034	0.545938	0.944251
PWY-3001 Superpathway of L-isoleucine biosynthesis I	Calories	-0.00826	0.014547	0.570547	0.94453
NAGLIPASYN-PWY Lipid IVA biosynthesis (E. coli)	Fiber	-0.01693	0.02828	0.549669	0.945209
PWY-8073 Lipid IVA biosynthesis (Pseudomonas putida)	Fiber	-0.01693	0.02828	0.549669	0.945209
CALVIN-PWY Calvin–Benson–Bassham cycle	Sodium	-0.00525	0.012741	0.680252	0.945622
PYRIDOXSYN-PWY Pyridoxal 5′-phosphate biosynthesis I	Sodium	0.010513	0.025569	0.681182	0.945731
PWY-6969 TCA cycle V (2-oxoglutarate synthase)	Proteins	-0.01315	0.021561	0.542148	0.946202
PWY-6470 Peptidoglycan biosynthesis V (β-lactam resistance)	Fiber	-0.0163	0.027485	0.55335	0.94626
PWY-6902 Chitin degradation II (Vibrio)	Fiber	0.018115	0.030841	0.557265	0.94626
PWY-8178 Pentose phosphate pathway, non-oxidative branch II	Fiber	0.009364	0.016121	0.561602	0.946464
ARO-PWY Chorismate biosynthesis I	Cholesterol	-0.00512	0.011611	0.659416	0.947001
OANTIGEN-PWY O-antigen building blocks biosynthesis (E. coli)	Cholesterol	0.006724	0.015206	0.658579	0.947001
PWY-6121 5-aminoimidazole ribonucleotide biosynthesis I	Cholesterol	-0.00503	0.011714	0.667971	0.947001
PWY-6151 S-adenosyl-L-methionine salvage I	Cholesterol	-0.00504	0.012067	0.676125	0.947001
PWY66-429 Fatty acid biosynthesis initiation (mitochondria)	Cholesterol	-0.00487	0.011414	0.670141	0.947001
ILEUSYN-PWY L-isoleucine biosynthesis I (from threonine)	Sodium	-0.00508	0.012612	0.687304	0.947332
COLANSYN-PWY Colanic acid building blocks biosynthesis	Carbohydrates	-0.00764	0.015287	0.617703	0.947477
PWY-5686 UMP biosynthesis I	Carbohydrates	-0.00771	0.01526	0.613843	0.947477
PWY-5941 Glycogen degradation II	Carbohydrates	-0.00805	0.016275	0.621189	0.947477
PWY-7111 Pyruvate fermentation to isobutanol (engineered)	Carbohydrates	-0.00961	0.0189	0.611511	0.947477
PWY-7790 UMP biosynthesis II	Carbohydrates	-0.00771	0.01526	0.613843	0.947477
PWY-7791 UMP biosynthesis III	Carbohydrates	-0.00771	0.01526	0.613843	0.947477
PWY-I9 L-cysteine biosynthesis VI (from L-methionine)	Carbohydrates	-0.01961	0.038769	0.613273	0.947477
PWY-6121 5-aminoimidazole ribonucleotide biosynthesis I	Calories	-0.00781	0.014178	0.581809	0.947684
PWY-6317 D-galactose degradation I (Leloir pathway)	Calories	0.009031	0.016448	0.583246	0.947684
PWY-724 Superpathway of L-lysine, L-threonine, and L-methionine biosynthesis II	Cholesterol	-0.00482	0.011622	0.67834	0.947712
CALVIN-PWY Calvin–Benson–Bassham cycle	Cholesterol	0.005092	0.012502	0.683979	0.948551
PWY-6270 Isoprene biosynthesis I	Cholesterol	-0.0053	0.013139	0.686949	0.948551
PWY-6519 8-amino-7-oxononanoate biosynthesis I	Proteins	0.016486	0.027242	0.545358	0.949565
PWY-6151 S-adenosyl-L-methionine salvage I	Fats	0.008548	0.014299	0.55025	0.949611
PWY66-399 Gluconeogenesis III	Sugar	-0.00861	0.02603	0.740893	0.949656
P441-PWY Superpathway of N-acetylneuraminate degradation	Carbohydrates	-0.01291	0.026989	0.632756	0.950486
PWY-7237 Myo-, chiro-, and scyllo-inositol degradation	Carbohydrates	-0.00903	0.018952	0.633988	0.950486
PWY-621 Sucrose degradation III (sucrose invertase)	Sugar	0.005997	0.018856	0.750601	0.950657
POLYISOPRENSYN-PWY Polyisoprenoid biosynthesis (E. coli)	Sodium	0.00827	0.022198	0.709651	0.950978
GLYCOGENSYNTH-PWY Glycogen biosynthesis I (from ADP-D-glucose)	Fats	0.00923	0.015555	0.553224	0.951323
PWY-7208 Superpathway of pyrimidine nucleobase salvage	Fats	-0.00928	0.015671	0.554083	0.952062
PWY-7323 Superpathway of GDP-mannose-derived O-antigen building block biosynthesis	Cholesterol	-0.00569	0.014801	0.700634	0.952177
X1CMET2-PWY Folate transformations III (E. coli)	Proteins	-0.00799	0.013437	0.552566	0.952424
PWY-7977 L-methionine biosynthesis IV	Proteins	-0.00843	0.014195	0.553048	0.952424
ARG-POLYAMINE-SYN-PWY Superpathway of arginine and polyamine biosynthesis	Sodium	0.009438	0.026074	0.717566	0.952667
PWY-5030 L-histidine degradation III	Sodium	-0.00906	0.024911	0.716255	0.952667
PWY-6608 Guanosine nucleotides degradation III	Sodium	-0.00664	0.018227	0.715958	0.952667
PWY-7323 Superpathway of GDP-mannose-derived O-antigen building block biosynthesis	Sodium	-0.00555	0.015082	0.712843	0.952667
GLUCOSE1PMETAB-PWY Glucose and glucose-1-phosphate degradation	Fiber	-0.01915	0.034253	0.576424	0.953142
NONMEVIPP-PWY Methylerythritol phosphate pathway I	Fiber	-0.00753	0.01355	0.578479	0.953142
PWY-7221 Guanosine ribonucleotides de novo biosynthesis	Proteins	-0.00847	0.014376	0.555909	0.953203
PWY-5121 Superpathway of geranylgeranyl diphosphate biosynthesis II (via MEP)	Carbohydrates	-0.01056	0.023022	0.646775	0.953414
GLCMANNANAUT-PWY Superpathway of N-acetylglucosamine, N-acetylmannosamine, and N-acetylneuraminate degradation	Sodium	-0.00502	0.015993	0.753608	0.954117
NAGLIPASYN-PWY Lipid IVA biosynthesis (E. coli)	Sodium	0.00843	0.024576	0.73175	0.954117
PWY-5103 L-isoleucine biosynthesis III	Sodium	-0.00419	0.013093	0.749306	0.954117
PWY-7237 Myo-, chiro-, and scyllo-inositol degradation	Sodium	-0.00467	0.014646	0.750258	0.954117
PWY-8073 Lipid IVA biosynthesis (Pseudomonas putida)	Sodium	0.00843	0.024576	0.73175	0.954117
PWY0-845 Superpathway of pyridoxal 5′-phosphate biosynthesis and salvage	Sodium	0.007811	0.023433	0.739056	0.954117
PWY-6122 5-aminoimidazole ribonucleotide biosynthesis II	Fiber	-0.00746	0.013628	0.584601	0.954275
PWY-6277 Superpathway of 5-aminoimidazole ribonucleotide biosynthesis	Fiber	-0.00746	0.013628	0.584601	0.954275
PWY-621 Sucrose degradation III (sucrose invertase)	Calories	0.010769	0.020253	0.595186	0.954496
PWY-6270 Isoprene biosynthesis I	Calories	-0.00782	0.014996	0.602471	0.954496
PWY-6969 TCA cycle V (2-oxoglutarate synthase)	Calories	-0.0124	0.023837	0.603224	0.954496
PWY-7345 Superpathway of anaerobic sucrose degradation	Calories	-0.00993	0.018888	0.59916	0.954496
PWY66-429 Fatty acid biosynthesis initiation (mitochondria)	Calories	-0.00706	0.01333	0.596784	0.954496
PWY-6823 Molybdopterin biosynthesis	Carbohydrates	-0.00931	0.020374	0.64808	0.954703
HSERMETANA-PWY L-methionine biosynthesis III	Fiber	0.008975	0.016879	0.595189	0.955401
PWY-3841 Folate transformations II (plants)	Fiber	-0.00753	0.01394	0.589291	0.955401
PWY-6147 6-hydroxymethyl-dihydropterin diphosphate biosynthesis I	Fiber	-0.01127	0.02106	0.592723	0.955401
PWY-7111 Pyruvate fermentation to isobutanol (engineered)	Fiber	0.00915	0.017187	0.594741	0.955401
PWY-6151 S-adenosyl-L-methionine salvage I	Calories	0.007827	0.015149	0.605651	0.956291
RIBOSYN2-PWY Flavin biosynthesis I (bacteria and plants)	Carbohydrates	-0.00637	0.014471	0.660139	0.956599
COBALSYN-PWY Superpathway of adenosylcobalamin salvage from cobinamide I	Fats	0.009371	0.016435	0.568803	0.956625
PWY-6292 Superpathway of L-cysteine biosynthesis (mammalian)	Fats	0.01256	0.02243	0.575778	0.956625
PWY-8004 Entner–Doudoroff pathway I	Fats	-0.011	0.019531	0.573447	0.956625
PWY66-409 Superpathway of purine nucleotide salvage	Fats	0.017223	0.030891	0.577422	0.956625
PWY-6969 TCA cycle V (2-oxoglutarate synthase)	Fiber	0.011214	0.02122	0.597449	0.956949
PWY-7237 Myo-, chiro-, and scyllo-inositol degradation	Calories	0.009677	0.01878	0.606614	0.957131
PWY-7456 β-1,4-mannan degradation	Sodium	-0.0052	0.016905	0.75848	0.957263
COA-PWY-1 Superpathway of coenzyme A biosynthesis III (mammals)	Calories	-0.00729	0.014213	0.60839	0.957348
METH-ACETATE-PWY Methanogenesis from acetate	Fats	0.014032	0.025241	0.578529	0.957745
RIBOSYN2-PWY Flavin biosynthesis I (bacteria and plants)	Fiber	-0.00699	0.013482	0.60421	0.957871
COBALSYN-PWY Superpathway of adenosylcobalamin salvage from cobinamide I	Carbohydrates	-0.00756	0.017567	0.667101	0.958007
PWY-1042 Glycolysis IV	Carbohydrates	-0.00656	0.015289	0.668066	0.958007
UDPNAGSYN-PWY UDP-N-acetyl-D-glucosamine biosynthesis I	Carbohydrates	0.010246	0.02373	0.666107	0.958007
BRANCHED-CHAIN-AA-SYN-PWY Superpathway of branched-chain amino acid biosynthesis	Proteins	-0.00832	0.014345	0.562225	0.958866
PWY-6629 Superpathway of L-tryptophan biosynthesis	Fats	0.007471	0.013708	0.586029	0.96077
PWY-6892 Thiazole component of thiamine diphosphate biosynthesis I	Fats	0.00926	0.017058	0.587499	0.96077
ARGSYNBSUB-PWY L-arginine biosynthesis II (acetyl cycle)	Cholesterol	0.004905	0.013947	0.725253	0.961708
COMPLETE-ARO-PWY Superpathway of aromatic amino acid biosynthesis	Cholesterol	-0.00379	0.011624	0.744533	0.961708
PWY-4041 γ-glutamyl cycle	Cholesterol	0.007174	0.021972	0.744202	0.961708
PWY-5121 Superpathway of geranylgeranyl diphosphate biosynthesis II (via MEP)	Cholesterol	-0.00562	0.017413	0.747044	0.961708
PWY-6628 Superpathway of L-phenylalanine biosynthesis	Cholesterol	0.005928	0.017333	0.732517	0.961708
PWY-7400 L-arginine biosynthesis IV (archaebacteria)	Cholesterol	-0.00473	0.014346	0.741933	0.961708
PWY-7560 Methylerythritol phosphate pathway II	Cholesterol	-0.00489	0.01415	0.729983	0.961708
PWY-8004 Entner–Doudoroff pathway I	Cholesterol	-0.00538	0.016463	0.744153	0.961708
PWY-6305 Superpathway of putrescine biosynthesis	Cholesterol	-0.00653	0.020408	0.749048	0.962048
POLYISOPRENSYN-PWY Polyisoprenoid biosynthesis (E. coli)	Fiber	0.012818	0.025143	0.610436	0.962193
ARGSYN-PWY L-arginine biosynthesis I (via L-ornithine)	Calories	0.008333	0.016943	0.623065	0.962563
ARGSYNBSUB-PWY L-arginine biosynthesis II (acetyl cycle)	Fats	0.008769	0.016601	0.59759	0.962674
GLUCONEO-PWY Gluconeogenesis I	Fats	-0.0105	0.020095	0.60143	0.962674
PHOSLIPSYN-PWY Superpathway of phospholipid biosynthesis I (bacteria)	Fats	0.010283	0.019624	0.600512	0.962674
PWY-3841 Folate transformations II (plants)	Fats	-0.00748	0.014307	0.601454	0.962674
PWY-6630 Superpathway of L-tyrosine biosynthesis	Fats	0.012054	0.022958	0.5998	0.962674
PWY-7199 Pyrimidine deoxyribonucleosides salvage	Proteins	-0.00844	0.015412	0.584159	0.962846
PWY-7851 Coenzyme A biosynthesis II (eukaryotic)	Proteins	-0.00771	0.013518	0.568821	0.962846
ARG-POLYAMINE-SYN-PWY Superpathway of arginine and polyamine biosynthesis	Proteins	0.016383	0.030138	0.586977	0.963111
PWY-5097 L-lysine biosynthesis VI	Proteins	-0.00751	0.013872	0.588432	0.96436
HSERMETANA-PWY L-methionine biosynthesis III	Sodium	-0.0043	0.014977	0.774144	0.965365
PWY-6353 Purine nucleotides degradation II (aerobic)	Sodium	0.005709	0.019913	0.774466	0.965365
PWY-6902 Chitin degradation II (Vibrio)	Sodium	-0.0077	0.026622	0.772504	0.965365
PWY-6282 Palmitoleate biosynthesis I (from 5Z-dodec-5-enoate)	Proteins	0.015398	0.028689	0.591725	0.965456
PWY0-162 Superpathway of pyrimidine ribonucleotides de novo biosynthesis	Sugar	-0.00526	0.018844	0.780249	0.965776
OANTIGEN-PWY O-antigen building blocks biosynthesis (E. coli)	Sodium	-0.00438	0.015594	0.778849	0.967569
ANAGLYCOLYSIS-PWY Glycolysis III (from glucose)	Cholesterol	-0.0036	0.011739	0.759483	0.967962
BIOTIN-BIOSYNTHESIS-PWY Biotin biosynthesis I	Fiber	-0.01219	0.025593	0.634154	0.968163
ARGININE-SYN4-PWY L-ornithine biosynthesis II	Calories	-0.01341	0.028817	0.64181	0.968199
GLYCOGENSYNTH-PWY Glycogen biosynthesis I (from ADP-D-glucose)	Calories	0.007634	0.016341	0.640609	0.968199
PWY-5384 Sucrose degradation IV (sucrose phosphorylase)	Calories	0.009169	0.019782	0.643201	0.968199
PWY-7323 Superpathway of GDP-mannose-derived O-antigen building block biosynthesis	Calories	0.008303	0.018374	0.651572	0.968199
PWY-6292 Superpathway of L-cysteine biosynthesis (mammalian)	Cholesterol	-0.00547	0.018617	0.768966	0.968259
PWY-5384 Sucrose degradation IV (sucrose phosphorylase)	Carbohydrates	-0.00794	0.019972	0.691254	0.968387
PWY-6892 Thiazole component of thiamine diphosphate biosynthesis I	Carbohydrates	-0.00717	0.018129	0.692572	0.968387
GLUCONEO-PWY Gluconeogenesis I	Carbohydrates	-0.00801	0.021527	0.709856	0.969177
HSERMETANA-PWY L-methionine biosynthesis III	Carbohydrates	0.006994	0.018517	0.705808	0.969177
PWY-8004 Entner–Doudoroff pathway I	Carbohydrates	-0.00792	0.020905	0.704828	0.969177
PWY0-1061 Superpathway of L-alanine biosynthesis	Carbohydrates	0.015766	0.041997	0.70753	0.969177
PWY-7197 Pyrimidine deoxyribonucleotide phosphorylation	Fats	-0.0088	0.017467	0.614692	0.970345
UDPNAGSYN-PWY UDP-N-acetyl-D-glucosamine biosynthesis I	Sodium	-0.00493	0.018291	0.78751	0.971263
GLUTORN-PWY L-ornithine biosynthesis I	Carbohydrates	0.005707	0.017184	0.739966	0.971294
PWY-6385 Peptidoglycan biosynthesis III (mycobacteria)	Carbohydrates	-0.00515	0.015394	0.738051	0.971294
PWY-6630 Superpathway of L-tyrosine biosynthesis	Carbohydrates	-0.00839	0.025019	0.737537	0.971294
TRNA-CHARGING-PWY tRNA charging	Carbohydrates	-0.00525	0.015589	0.736401	0.971294
PWY-6163 Chorismate biosynthesis from 3-dehydroquinate	Proteins	-0.00705	0.013502	0.601629	0.971357
PWY-5667 CDP-diacylglycerol biosynthesis I	Calories	-0.006	0.013535	0.657914	0.971769
PWY0-1319 CDP-diacylglycerol biosynthesis II	Calories	-0.006	0.013535	0.657788	0.971769
GLYCOLYSIS-ED-PWY Superpathway of glycolysis and the Entner–Doudoroff pathway	Calories	-0.00874	0.019986	0.66224	0.971894
ILEUSYN-PWY L-isoleucine biosynthesis I (from threonine)	Proteins	-0.0075	0.014445	0.603757	0.972095
PWY-7111 Pyruvate fermentation to isobutanol (engineered)	Proteins	0.00894	0.01738	0.607238	0.972095
COA-PWY Coenzyme A biosynthesis I (prokaryotic)	Calories	-0.00605	0.014364	0.673615	0.97214
PWY-5103 L-isoleucine biosynthesis III	Calories	-0.0069	0.016305	0.672536	0.97214
PWY-6292 Superpathway of L-cysteine biosynthesis (mammalian)	Calories	0.009973	0.023934	0.677082	0.97214
PWY-6859 All-trans-farnesol biosynthesis	Calories	0.013748	0.03273	0.674643	0.97214
PWY66-409 Superpathway of purine nucleotide salvage	Calories	0.013948	0.032924	0.672018	0.97214
X1CMET2-PWY Folate transformations III (E. coli)	Fats	-0.00664	0.013587	0.625541	0.972603
ARGININE-SYN4-PWY L-ornithine biosynthesis II	Fats	0.012341	0.026442	0.64094	0.972603
ARGSYN-PWY L-arginine biosynthesis I (via L-ornithine)	Fats	0.007555	0.015975	0.636505	0.972603
PWY-5695 Inosine-5′-phosphate degradation	Fats	-0.00666	0.013719	0.627554	0.972603
PWY-6317 D-galactose degradation I (Leloir pathway)	Fats	0.007321	0.015581	0.638639	0.972603
COBALSYN-PWY Superpathway of adenosylcobalamin salvage from cobinamide I	Calories	0.007102	0.017393	0.683249	0.972836
METH-ACETATE-PWY Methanogenesis from acetate	Calories	0.010833	0.026454	0.682392	0.972836
PWY-6470 Peptidoglycan biosynthesis V (β-lactam resistance)	Calories	0.012563	0.030591	0.681507	0.972836
PWY-7392 Taxadiene biosynthesis (engineered)	Calories	0.012111	0.029715	0.683759	0.972836
RHAMCAT-PWY L-rhamnose degradation I	Calories	-0.00708	0.017353	0.683307	0.972836
PWY-8187 L-arginine degradation XIII (reductive Stickland reaction)	Calories	0.009597	0.023929	0.68855	0.974861
NONMEVIPP-PWY Methylerythritol phosphate pathway I	Calories	-0.00553	0.014565	0.704155	0.975144
PWY-7234 Inosine-5′-phosphate biosynthesis III	Calories	0.009657	0.025662	0.706836	0.975144
PWY-7851 Coenzyme A biosynthesis II (eukaryotic)	Calories	-0.00564	0.014309	0.693476	0.975144
PWY-5971 Palmitate biosynthesis (type II fatty acid synthase)	Fats	-0.01151	0.026211	0.660845	0.975477
PWY-702 L-methionine biosynthesis II	Fats	-0.01304	0.029377	0.657348	0.975477
PWY-621 Sucrose degradation III (sucrose invertase)	Cholesterol	0.004318	0.015572	0.781722	0.975522
PWY-7328 Superpathway of UDP-glucose-derived O-antigen building block biosynthesis	Cholesterol	0.004988	0.017915	0.780807	0.975522
THISYNARA-PWY Superpathway of thiamine diphosphate biosynthesis III (eukaryotes)	Cholesterol	-0.00395	0.014258	0.781736	0.975522
BIOTIN-BIOSYNTHESIS-PWY Biotin biosynthesis I	Carbohydrates	-0.00908	0.028407	0.749518	0.975912
NONOXIPENT-PWY Pentose phosphate pathway, non-oxidative branch I	Calories	0.006762	0.018525	0.715265	0.976022
PWY-6630 Superpathway of L-tyrosine biosynthesis	Calories	0.009096	0.024798	0.713917	0.976022
TRNA-CHARGING-PWY tRNA charging	Proteins	-0.00703	0.014279	0.622613	0.976821
PWY-7199 Pyrimidine deoxyribonucleosides salvage	Fats	-0.00662	0.015615	0.671909	0.977482
PWY-5100 Pyruvate fermentation to acetate and lactate II	Fiber	0.008906	0.019504	0.64817	0.977648
PWY-6168 Flavin biosynthesis III (fungi)	Fats	0.015393	0.037175	0.679014	0.977938
PYRIDOXSYN-PWY Pyridoxal 5′-phosphate biosynthesis I	Fats	0.01262	0.030473	0.678973	0.977938
PWY-6386 UDP-N-acetylmuramoyl-pentapeptide biosynthesis II (lysine-containing)	Carbohydrates	-0.00485	0.015522	0.755066	0.977974
PWY-6387 UDP-N-acetylmuramoyl-pentapeptide biosynthesis I (meso-diaminopimelate-containing)	Carbohydrates	-0.00485	0.015565	0.755512	0.97798
PWY-7953 UDP-N-acetylmuramoyl-pentapeptide biosynthesis III (meso-diaminopimelate-containing)	Carbohydrates	-0.00479	0.01544	0.756344	0.978298
BRANCHED-CHAIN-AA-SYN-PWY Superpathway of branched-chain amino acid biosynthesis	Calories	-0.00541	0.015468	0.72647	0.978331
PWY-7400 L-arginine biosynthesis IV (archaebacteria)	Calories	0.005999	0.017447	0.731123	0.978331
PWY-8178 Pentose phosphate pathway, non-oxidative branch II	Calories	0.006084	0.017522	0.728597	0.978331
PWY-6527 Stachyose degradation	Sodium	-0.00384	0.01542	0.803493	0.978943
PWY-7560 Methylerythritol phosphate pathway II	Sodium	-0.00353	0.014408	0.806396	0.978943
PWY-6270 Isoprene biosynthesis I	Fats	-0.00595	0.014522	0.68231	0.979139
PWY-5154 L-arginine biosynthesis III (via N-acetyl-L-citrulline)	Fiber	-0.00809	0.018355	0.659599	0.979606
TRPSYN-PWY L-tryptophan biosynthesis	Sodium	-0.00303	0.012902	0.814592	0.980486
CALVIN-PWY Calvin–Benson–Bassham cycle	Carbohydrates	-0.00477	0.015677	0.761276	0.980887
BIOTIN-BIOSYNTHESIS-PWY Biotin biosynthesis I	Proteins	0.011415	0.025904	0.659668	0.981331
GLYCOCAT-PWY Glycogen degradation I	Proteins	0.013308	0.030257	0.660259	0.981331
HSERMETANA-PWY L-methionine biosynthesis III	Proteins	0.007789	0.017061	0.648233	0.981331
PWY-5686 UMP biosynthesis I	Proteins	-0.00626	0.014048	0.655948	0.981331
PWY-5695 Inosine-5′-phosphate degradation	Proteins	-0.00626	0.013567	0.644767	0.981331
PWY-6895 Superpathway of thiamine diphosphate biosynthesis II	Proteins	0.016058	0.034516	0.641974	0.981331
PWY-7229 Superpathway of adenosine nucleotides de novo biosynthesis I	Proteins	-0.00655	0.015107	0.664702	0.981331
PWY-7282 4-amino-2-methyl-5-diphosphomethylpyrimidine biosynthesis II	Proteins	0.008831	0.020242	0.66283	0.981331
PWY-7664 Oleate biosynthesis IV (anaerobic)	Proteins	0.012461	0.028378	0.660781	0.981331
PWY-7790 UMP biosynthesis II	Proteins	-0.00626	0.014048	0.655948	0.981331
PWY-7791 UMP biosynthesis III	Proteins	-0.00626	0.014048	0.655948	0.981331
ARGSYNBSUB-PWY L-arginine biosynthesis II (acetyl cycle)	Fiber	0.006783	0.016129	0.674293	0.981428
ARO-PWY Chorismate biosynthesis I	Fiber	-0.00542	0.013175	0.680894	0.981428
PWY-6630 Superpathway of L-tyrosine biosynthesis	Fiber	0.008938	0.022062	0.685594	0.981428
VALSYN-PWY L-valine biosynthesis	Fiber	0.005321	0.013478	0.693193	0.981434
PWY-1042 Glycolysis IV	Cholesterol	-0.00314	0.012074	0.794837	0.981935
VALSYN-PWY L-valine biosynthesis	Carbohydrates	-0.00444	0.014779	0.763925	0.981999
ARGSYNBSUB-PWY L-arginine biosynthesis II (acetyl cycle)	Carbohydrates	0.005302	0.017795	0.765856	0.982336
METH-ACETATE-PWY Methanogenesis from acetate	Proteins	0.010679	0.024952	0.668851	0.98283
PWY-6630 Superpathway of L-tyrosine biosynthesis	Proteins	-0.00948	0.022407	0.672444	0.98283
PWY-702 L-methionine biosynthesis II	Carbohydrates	-0.00922	0.031183	0.767596	0.983287
ARO-PWY Chorismate biosynthesis I	Proteins	-0.00538	0.013288	0.685529	0.98356
ASPASN-PWY Superpathway of L-aspartate and L-asparagine biosynthesis	Proteins	0.006626	0.016463	0.687527	0.98356
COBALSYN-PWY Superpathway of adenosylcobalamin salvage from cobinamide I	Proteins	0.006128	0.016175	0.704942	0.98356
PWY-5384 Sucrose degradation IV (sucrose phosphorylase)	Proteins	0.007607	0.018143	0.675212	0.98356
PWY-5505 L-glutamate and L-glutamine biosynthesis	Proteins	0.010186	0.025504	0.689786	0.98356
PWY-6122 5-aminoimidazole ribonucleotide biosynthesis II	Proteins	-0.00528	0.01377	0.701777	0.98356
PWY-6126 Superpathway of adenosine nucleotides de novo biosynthesis II	Proteins	-0.00615	0.016584	0.711049	0.98356
PWY-6277 Superpathway of 5-aminoimidazole ribonucleotide biosynthesis	Proteins	-0.00528	0.01377	0.701777	0.98356
PWY-6608 Guanosine nucleotides degradation III	Proteins	0.008711	0.020781	0.675274	0.98356
PWY-7220 Adenosine deoxyribonucleotides de novo biosynthesis II	Proteins	-0.0071	0.019295	0.712973	0.98356
PWY-7222 Guanosine deoxyribonucleotides de novo biosynthesis II	Proteins	-0.0071	0.019295	0.712973	0.98356
PWY-7228 Superpathway of guanosine nucleotides de novo biosynthesis I	Proteins	-0.00652	0.016923	0.700329	0.98356
PWY-7357 Thiamine phosphate formation from pyrithiamine and oxythiamine (yeast)	Proteins	0.00625	0.015149	0.68011	0.98356
PWY-7400 L-arginine biosynthesis IV (archaebacteria)	Proteins	0.006573	0.016418	0.689059	0.98356
PWY-841 Superpathway of purine nucleotides de novo biosynthesis I	Proteins	-0.00586	0.014656	0.689575	0.98356
FASYN-ELONG-PWY Fatty acid elongation (saturated)	Proteins	0.010013	0.027959	0.720411	0.983587
PWY-6125 Superpathway of guanosine nucleotides de novo biosynthesis II	Proteins	-0.00639	0.017705	0.718362	0.983587
PYRIDOXSYN-PWY Pyridoxal 5′-phosphate biosynthesis I	Proteins	-0.01074	0.029796	0.718757	0.983587
ASPASN-PWY Superpathway of L-aspartate and L-asparagine biosynthesis	Sodium	-0.00253	0.01434	0.860152	0.984005
PWY-621 Sucrose degradation III (sucrose invertase)	Sodium	-0.00282	0.015968	0.859717	0.984005
PWY-7392 Taxadiene biosynthesis (engineered)	Sodium	0.004067	0.023011	0.8598	0.984005
PWY4FS-7 Phosphatidylglycerol biosynthesis I (plastidic)	Fiber	0.008109	0.0208	0.696821	0.984149
PWY4FS-8 Phosphatidylglycerol biosynthesis II (non-plastidic)	Fiber	0.008109	0.0208	0.696816	0.984149
THISYNARA-PWY Superpathway of thiamine diphosphate biosynthesis III (eukaryotes)	Fiber	0.006371	0.016531	0.700127	0.984149
PWY-2941 L-lysine biosynthesis II	Sodium	-0.00282	0.017677	0.873195	0.98473
PWY-6122 5-aminoimidazole ribonucleotide biosynthesis II	Cholesterol	-0.00282	0.011874	0.812341	0.985462
PWY-6277 Superpathway of 5-aminoimidazole ribonucleotide biosynthesis	Cholesterol	-0.00282	0.011874	0.812341	0.985462
NONOXIPENT-PWY Pentose phosphate pathway, non-oxidative branch I	Sodium	0.002111	0.015112	0.88896	0.986253
OANTIGEN-PWY O-antigen building blocks biosynthesis (E. coli)	Sugar	0.002811	0.018406	0.878692	0.986331
PWY-6630 Superpathway of L-tyrosine biosynthesis	Sugar	-0.00347	0.022823	0.879285	0.986363
GLUTORN-PWY L-ornithine biosynthesis I	Cholesterol	0.003008	0.013528	0.824157	0.987181
DTDPRHAMSYN-PWY dTDP-β-L-rhamnose biosynthesis	Proteins	-0.00528	0.01499	0.724926	0.987323
PWY66-409 Superpathway of purine nucleotide salvage	Carbohydrates	-0.00909	0.033242	0.784661	0.988059
PWY-7282 4-amino-2-methyl-5-diphosphomethylpyrimidine biosynthesis II	Sodium	0.002368	0.017787	0.894138	0.988331
PWY-8004 Entner–Doudoroff pathway I	Proteins	0.00673	0.019209	0.726244	0.988341
HISTSYN-PWY L-histidine biosynthesis	Fats	-0.00502	0.013582	0.711976	0.988622
PWY-2942 L-lysine biosynthesis III	Fats	-0.00514	0.013724	0.707947	0.988622
PWY-724 Superpathway of L-lysine, L-threonine, and L-methionine biosynthesis II	Fats	-0.00492	0.013236	0.710326	0.988622
ARGSYN-PWY L-arginine biosynthesis I (via L-ornithine)	Cholesterol	0.00273	0.013442	0.839181	0.988833
PWY-7198 Pyrimidine deoxyribonucleotides de novo biosynthesis IV	Cholesterol	-0.0047	0.022442	0.834074	0.988833
PWY-8187 L-arginine degradation XIII (reductive Stickland reaction)	Cholesterol	0.003857	0.01921	0.840953	0.988833
RIBOSYN2-PWY Flavin biosynthesis I (bacteria and plants)	Cholesterol	-0.0025	0.012002	0.835142	0.988833
POLYISOPRENSYN-PWY Polyisoprenoid biosynthesis (E. coli)	Cholesterol	-0.00297	0.021737	0.89152	0.989036
PWY-5505 L-glutamate and L-glutamine biosynthesis	Cholesterol	0.003305	0.021972	0.880519	0.989036
PWY-6969 TCA cycle V (2-oxoglutarate synthase)	Cholesterol	-0.00293	0.017924	0.870324	0.989036
PWY-7238 Sucrose biosynthesis II	Cholesterol	0.001956	0.012521	0.875948	0.989036
PWY-7242 D-fructuronate degradation	Cholesterol	0.00237	0.019033	0.900984	0.989036
PWY-7357 Thiamine phosphate formation from pyrithiamine and oxythiamine (yeast)	Cholesterol	0.002442	0.012959	0.850626	0.989036
TRPSYN-PWY L-tryptophan biosynthesis	Cholesterol	0.001894	0.012667	0.881236	0.989036
COBALSYN-PWY Superpathway of adenosylcobalamin salvage from cobinamide I	Fiber	-0.0058	0.016002	0.717334	0.989119
PWY-7234 Inosine-5′-phosphate biosynthesis III	Carbohydrates	-0.007	0.025887	0.787091	0.98929
HSERMETANA-PWY L-methionine biosynthesis III	Sugar	-0.00207	0.017386	0.9054	0.989685
PWY-5097 L-lysine biosynthesis VI	Calories	-0.00462	0.014844	0.755632	0.989893
PWY-5659 GDP-mannose biosynthesis	Calories	0.005378	0.017367	0.756961	0.989893
COLANSYN-PWY Colanic acid building blocks biosynthesis	Cholesterol	0.001411	0.012757	0.911973	0.990043
PWY-7345 Superpathway of anaerobic sucrose degradation	Proteins	0.006063	0.017635	0.731148	0.990329
GLYCOGENSYNTH-PWY Glycogen biosynthesis I (from ADP-D-glucose)	Carbohydrates	0.002899	0.016511	0.860702	0.990342
P41-PWY Pyruvate fermentation to acetate and S-lactate I	Carbohydrates	-0.00463	0.021856	0.832493	0.990342
PEPTIDOGLYCANSYN-PWY Peptidoglycan biosynthesis I (meso-diaminopimelate-containing)	Carbohydrates	-0.00378	0.015652	0.809146	0.990342
PWY-4041 γ-glutamyl cycle	Carbohydrates	0.005769	0.027874	0.836135	0.990342
PWY-5505 L-glutamate and L-glutamine biosynthesis	Carbohydrates	-0.0067	0.027655	0.808669	0.990342
PWY-5659 GDP-mannose biosynthesis	Carbohydrates	-0.00372	0.017534	0.832092	0.990342
PWY-621 Sucrose degradation III (sucrose invertase)	Carbohydrates	0.004567	0.020447	0.823375	0.990342
PWY-6629 Superpathway of L-tryptophan biosynthesis	Carbohydrates	-0.00376	0.014545	0.795879	0.990342
PWY-6902 Chitin degradation II (Vibrio)	Carbohydrates	-0.00655	0.035352	0.852997	0.990342
PWY-7238 Sucrose biosynthesis II	Carbohydrates	-0.00315	0.015709	0.840922	0.990342
PWY-7323 Superpathway of GDP-mannose-derived O-antigen building block biosynthesis	Carbohydrates	-0.00481	0.018559	0.795693	0.990342
PWY-7357 Thiamine phosphate formation from pyrithiamine and oxythiamine (yeast)	Carbohydrates	0.003518	0.016513	0.831412	0.990342
PWY-7456 β-1,4-mannan degradation	Carbohydrates	-0.0035	0.020964	0.867665	0.990342
PWY0-1261 Anhydromuropeptides recycling I	Carbohydrates	0.006646	0.025612	0.795378	0.990342
PWY0-1296 Purine ribonucleosides degradation	Carbohydrates	-0.0036	0.017246	0.834556	0.990342
PENTOSE-P-PWY Pentose phosphate pathway	Proteins	-0.00517	0.015608	0.740663	0.990363
PWY-2941 L-lysine biosynthesis II	Proteins	-0.00649	0.020145	0.747484	0.990363
PWY-5100 Pyruvate fermentation to acetate and lactate II	Proteins	0.006289	0.019721	0.749945	0.990409
ARGSYN-PWY L-arginine biosynthesis I (via L-ornithine)	Carbohydrates	0.002386	0.017113	0.889196	0.990448
FASYN-ELONG-PWY Fatty acid elongation (saturated)	Carbohydrates	-0.00429	0.030735	0.889069	0.990448
NONOXIPENT-PWY Pentose phosphate pathway, non-oxidative branch I	Carbohydrates	-0.00295	0.018709	0.874574	0.990448
OANTIGEN-PWY O-antigen building blocks biosynthesis (E. coli)	Carbohydrates	0.002676	0.019954	0.89338	0.990448
POLYISOPRENSYN-PWY Polyisoprenoid biosynthesis (E. coli)	Carbohydrates	0.003687	0.027759	0.894386	0.990448
PWY-6519 8-amino-7-oxononanoate biosynthesis I	Carbohydrates	-0.00468	0.029956	0.875923	0.990448
PWY-6936 Seleno-amino acid biosynthesis (plants)	Carbohydrates	0.003365	0.022901	0.883234	0.990448
PWY-8178 Pentose phosphate pathway, non-oxidative branch II	Carbohydrates	-0.00227	0.017695	0.897883	0.990448
PWY-8187 L-arginine degradation XIII (reductive Stickland reaction)	Carbohydrates	0.003676	0.024165	0.879169	0.990448
PWY-5384 Sucrose degradation IV (sucrose phosphorylase)	Sugar	-0.00157	0.018479	0.93216	0.990806
GLYCOLYSIS-ED-PWY Superpathway of glycolysis and the Entner–Doudoroff pathway	Fats	-0.00688	0.018882	0.715915	0.990855
PWY-6609 Adenine and adenosine salvage III	Proteins	-0.00445	0.014019	0.750843	0.991006
PWY-7345 Superpathway of anaerobic sucrose degradation	Fats	-0.00647	0.017901	0.717853	0.991066
PWY66-409 Superpathway of purine nucleotide salvage	Fiber	0.01057	0.029934	0.724166	0.991085
PWY-6292 Superpathway of L-cysteine biosynthesis (mammalian)	Carbohydrates	-0.00281	0.024169	0.907504	0.99152
PWY0-1261 Anhydromuropeptides recycling I	Sugar	-0.00174	0.024252	0.94271	0.991573
HSERMETANA-PWY L-methionine biosynthesis III	Cholesterol	-0.00148	0.014686	0.919993	0.991593
PWY-6151 S-adenosyl-L-methionine salvage I	Carbohydrates	-0.00175	0.015299	0.909015	0.991842
PWY66-429 Fatty acid biosynthesis initiation (mitochondria)	Fiber	-0.0044	0.012679	0.728558	0.992159
ANAEROFRUCAT-PWY Homolactic fermentation	Proteins	-0.00316	0.016871	0.851364	0.992271
ANAGLYCOLYSIS-PWY Glycolysis III (from glucose)	Proteins	-0.00231	0.013414	0.863478	0.992271
ARGININE-SYN4-PWY L-ornithine biosynthesis II	Proteins	-0.00159	0.025729	0.950655	0.992271
ARGSYN-PWY L-arginine biosynthesis I (via L-ornithine)	Proteins	-0.00165	0.015706	0.916263	0.992271
ARGSYNBSUB-PWY L-arginine biosynthesis II (acetyl cycle)	Proteins	0.000999	0.016318	0.951206	0.992271
CALVIN-PWY Calvin–Benson–Bassham cycle	Proteins	-0.00149	0.014483	0.918001	0.992271
CITRULBIO-PWY L-citrulline biosynthesis	Proteins	-0.00578	0.021748	0.790591	0.992271
COMPLETE-ARO-PWY Superpathway of aromatic amino acid biosynthesis	Proteins	-0.00368	0.013314	0.782124	0.992271
DAPLYSINESYN-PWY L-lysine biosynthesis I	Proteins	0.010838	0.035811	0.762292	0.992271
GLUCONEO-PWY Gluconeogenesis I	Proteins	0.005218	0.019753	0.79178	0.992271
GLUCOSE1PMETAB-PWY Glucose and glucose-1-phosphate degradation	Proteins	-0.00157	0.034454	0.963667	0.992271
GLUTORN-PWY L-ornithine biosynthesis I	Proteins	0.001898	0.015788	0.904337	0.992271
GLYCOGENSYNTH-PWY Glycogen biosynthesis I (from ADP-D-glucose)	Proteins	0.002635	0.015361	0.863901	0.992271
GLYCOLYSIS-ED-PWY Superpathway of glycolysis and the Entner–Doudoroff pathway	Proteins	0.005709	0.018575	0.758698	0.992271
NAGLIPASYN-PWY Lipid IVA biosynthesis (E. coli)	Proteins	-0.00782	0.028714	0.785406	0.992271
NONOXIPENT-PWY Pentose phosphate pathway, non-oxidative branch I	Proteins	0.003286	0.017232	0.848842	0.992271
P41-PWY Pyruvate fermentation to acetate and S-lactate I	Proteins	0.005115	0.020171	0.799939	0.992271
PEPTIDOGLYCANSYN-PWY Peptidoglycan biosynthesis I (meso-diaminopimelate-containing)	Proteins	-0.00295	0.014367	0.837428	0.992271
PHOSLIPSYN-PWY Superpathway of phospholipid biosynthesis I (bacteria)	Proteins	-0.0012	0.019355	0.950587	0.992271
PWY-1042 Glycolysis IV	Proteins	-0.00178	0.014067	0.899536	0.992271
PWY-3001 Superpathway of L-isoleucine biosynthesis I	Proteins	-0.00299	0.013798	0.828801	0.992271
PWY-5484 Glycolysis II (from fructose-6-phosphate)	Proteins	-0.00134	0.018768	0.943058	0.992271
PWY-5667 CDP-diacylglycerol biosynthesis I	Proteins	-0.00327	0.01279	0.798443	0.992271
PWY-5971 Palmitate biosynthesis (type II fatty acid synthase)	Proteins	-0.00225	0.025891	0.930802	0.992271
PWY-6147 6-hydroxymethyl-dihydropterin diphosphate biosynthesis I	Proteins	-0.00644	0.021296	0.762378	0.992271
PWY-6151 S-adenosyl-L-methionine salvage I	Proteins	0.003479	0.014067	0.804776	0.992271
PWY-621 Sucrose degradation III (sucrose invertase)	Proteins	0.004294	0.018516	0.816728	0.992271
PWY-6270 Isoprene biosynthesis I	Proteins	0.002246	0.014471	0.876711	0.992271
PWY-6292 Superpathway of L-cysteine biosynthesis (mammalian)	Proteins	-0.00673	0.021991	0.759707	0.992271
PWY-6317 D-galactose degradation I (Leloir pathway)	Proteins	0.003643	0.015348	0.812502	0.992271
PWY-6385 Peptidoglycan biosynthesis III (mycobacteria)	Proteins	-0.00283	0.01417	0.841575	0.992271
PWY-6386 UDP-N-acetylmuramoyl-pentapeptide biosynthesis II (lysine-containing)	Proteins	-0.00367	0.014256	0.797134	0.992271
PWY-6387 UDP-N-acetylmuramoyl-pentapeptide biosynthesis I (meso-diaminopimelate-containing)	Proteins	-0.00362	0.0143	0.800343	0.992271
PWY-6628 Superpathway of L-phenylalanine biosynthesis	Proteins	-0.00505	0.020311	0.803916	0.992271
PWY-6629 Superpathway of L-tryptophan biosynthesis	Proteins	0.000936	0.013537	0.944905	0.992271
PWY-6700 Queuosine biosynthesis I (de novo)	Proteins	-0.00285	0.014402	0.843197	0.992271
PWY-6892 Thiazole component of thiamine diphosphate biosynthesis I	Proteins	0.000845	0.016833	0.959979	0.992271
PWY-6897 Thiamine diphosphate salvage II	Proteins	-0.00328	0.015348	0.831067	0.992271
PWY-6901 Superpathway of glucose and xylose degradation	Proteins	-0.00079	0.014354	0.956064	0.992271
PWY-6902 Chitin degradation II (Vibrio)	Proteins	0.008442	0.031392	0.788115	0.992271
PWY-6906 Chitin derivatives degradation	Proteins	0.002782	0.038357	0.942209	0.992271
PWY-702 L-methionine biosynthesis II	Proteins	0.00533	0.029014	0.854314	0.992271
PWY-7197 Pyrimidine deoxyribonucleotide phosphorylation	Proteins	-0.00436	0.017256	0.800609	0.992271
PWY-7208 Superpathway of pyrimidine nucleobase salvage	Proteins	-0.00382	0.015551	0.806238	0.992271
PWY-7234 Inosine-5′-phosphate biosynthesis III	Proteins	0.005797	0.023034	0.801416	0.992271
PWY-7238 Sucrose biosynthesis II	Proteins	-0.00327	0.014506	0.821949	0.992271
PWY-7328 Superpathway of UDP-glucose-derived O-antigen building block biosynthesis	Proteins	0.002649	0.021028	0.899818	0.992271
PWY-7383 Anaerobic energy metabolism (invertebrates, cytosol)	Proteins	0.006679	0.031709	0.833258	0.992271
PWY-7560 Methylerythritol phosphate pathway II	Proteins	0.002802	0.016326	0.86379	0.992271
PWY-7953 UDP-N-acetylmuramoyl-pentapeptide biosynthesis III (meso-diaminopimelate-containing)	Proteins	-0.00239	0.014208	0.866396	0.992271
PWY-8073 Lipid IVA biosynthesis (Pseudomonas putida)	Proteins	-0.00782	0.028714	0.785406	0.992271
PWY-8178 Pentose phosphate pathway, non-oxidative branch II	Proteins	0.001222	0.016301	0.940295	0.992271
PWY-I9 L-cysteine biosynthesis VI (from L-methionine)	Proteins	-0.00724	0.035999	0.840698	0.992271
PWY0-1061 Superpathway of L-alanine biosynthesis	Proteins	0.010449	0.038039	0.783665	0.992271
PWY0-1296 Purine ribonucleosides degradation	Proteins	0.001442	0.01583	0.927484	0.992271
PWY0-1319 CDP-diacylglycerol biosynthesis II	Proteins	-0.00327	0.01279	0.798359	0.992271
PWY0-1586 Peptidoglycan maturation (meso-diaminopimelate-containing)	Proteins	-0.00433	0.015191	0.775669	0.992271
PWY0-845 Superpathway of pyridoxal 5′-phosphate biosynthesis and salvage	Proteins	-0.00119	0.027192	0.965098	0.992271
PWY4FS-7 Phosphatidylglycerol biosynthesis I (plastidic)	Proteins	-0.00556	0.021013	0.791306	0.992271
PWY4FS-8 Phosphatidylglycerol biosynthesis II (non-plastidic)	Proteins	-0.00556	0.021013	0.791311	0.992271
PWY66-399 Gluconeogenesis III	Proteins	-0.00179	0.025552	0.94422	0.992271
PWY66-429 Fatty acid biosynthesis initiation (mitochondria)	Proteins	-0.00244	0.012754	0.848268	0.992271
RIBOSYN2-PWY Flavin biosynthesis I (bacteria and plants)	Proteins	-0.00068	0.013584	0.96025	0.992271
THISYNARA-PWY Superpathway of thiamine diphosphate biosynthesis III (eukaryotes)	Proteins	0.002169	0.016731	0.896923	0.992271
TRPSYN-PWY L-tryptophan biosynthesis	Proteins	0.004154	0.014651	0.776908	0.992271
VALSYN-PWY L-valine biosynthesis	Proteins	-0.00281	0.013624	0.836854	0.992271
PWY-6629 Superpathway of L-tryptophan biosynthesis	Calories	0.004285	0.0144	0.7662	0.9923
PWY-8004 Entner–Doudoroff pathway I	Calories	-0.00615	0.0207	0.766574	0.9923
NONOXIPENT-PWY Pentose phosphate pathway, non-oxidative branch I	Fiber	0.005898	0.017046	0.729507	0.992345
ILEUSYN-PWY L-isoleucine biosynthesis I (from threonine)	Calories	-0.00461	0.015604	0.76802	0.992436
PWY-7328 Superpathway of UDP-glucose-derived O-antigen building block biosynthesis	Calories	0.006654	0.022767	0.770225	0.992436
ARG-POLYAMINE-SYN-PWY Superpathway of arginine and polyamine biosynthesis	Carbohydrates	-0.00334	0.033174	0.919728	0.992757
PWY-5100 Pyruvate fermentation to acetate and lactate II	Carbohydrates	-0.00118	0.021439	0.956081	0.992757
PWY-5989 Stearate biosynthesis II (bacteria and plants)	Carbohydrates	0.001666	0.030723	0.956765	0.992757
PWY-6700 Queuosine biosynthesis I (de novo)	Carbohydrates	-0.00168	0.015648	0.91468	0.992757
PWY-6969 TCA cycle V (2-oxoglutarate synthase)	Carbohydrates	-0.00156	0.024055	0.948451	0.992757
PWY-7664 Oleate biosynthesis IV (anaerobic)	Carbohydrates	-0.00192	0.031229	0.951014	0.992757
PWY-7761 NAD salvage pathway II (PNC IV cycle)	Carbohydrates	0.002353	0.033114	0.943378	0.992757
PWY-7456 β-1,4-mannan degradation	Cholesterol	-0.00119	0.016568	0.942596	0.993022
FASYN-ELONG-PWY Fatty acid elongation (saturated)	Fiber	-0.00936	0.027609	0.734805	0.993113
PWY-6163 Chorismate biosynthesis from 3-dehydroquinate	Fiber	-0.00458	0.013378	0.732189	0.993113
PWY-6608 Guanosine nucleotides degradation III	Fats	-0.00748	0.021119	0.723474	0.993267
ARGININE-SYN4-PWY L-ornithine biosynthesis II	Fiber	-0.00811	0.025282	0.748428	0.993889
COLANSYN-PWY Colanic acid building blocks biosynthesis	Fiber	-0.00411	0.014287	0.773635	0.993889
COMPLETE-ARO-PWY Superpathway of aromatic amino acid biosynthesis	Fiber	-0.00439	0.013198	0.739773	0.993889
GLCMANNANAUT-PWY Superpathway of N-acetylglucosamine, N-acetylmannosamine, and N-acetylneuraminate degradation	Fiber	-0.00523	0.01781	0.769155	0.993889
PENTOSE-P-PWY Pentose phosphate pathway	Fiber	-0.00519	0.015488	0.737528	0.993889
PWY-5097 L-lysine biosynthesis VI	Fiber	-0.00443	0.013739	0.747153	0.993889
PWY-5695 Inosine-5′-phosphate degradation	Fiber	-0.00444	0.01346	0.741682	0.993889
PWY-6292 Superpathway of L-cysteine biosynthesis (mammalian)	Fiber	-0.0068	0.021714	0.75444	0.993889
PWY-6519 8-amino-7-oxononanoate biosynthesis I	Fiber	-0.00812	0.026912	0.762896	0.993889
PWY-6609 Adenine and adenosine salvage III	Fiber	-0.00419	0.013872	0.763023	0.993889
PWY-6823 Molybdopterin biosynthesis	Fiber	-0.0061	0.018554	0.74252	0.993889
PWY-7456 β-1,4-mannan degradation	Fiber	0.00602	0.019081	0.752509	0.993889
ARG-POLYAMINE-SYN-PWY Superpathway of arginine and polyamine biosynthesis	Fiber	0.005091	0.02975	0.864204	0.993909
ARGSYN-PWY L-arginine biosynthesis I (via L-ornithine)	Fiber	0.003325	0.015529	0.830532	0.993909
ASPASN-PWY Superpathway of L-aspartate and L-asparagine biosynthesis	Fiber	-0.00218	0.016273	0.8934	0.993909
CALVIN-PWY Calvin–Benson–Bassham cycle	Fiber	0.00239	0.014336	0.867674	0.993909
GLUCONEO-PWY Gluconeogenesis I	Fiber	-0.00322	0.019532	0.869111	0.993909
GLYCOCAT-PWY Glycogen degradation I	Fiber	-0.00688	0.029924	0.818236	0.993909
GLYCOLYSIS-ED-PWY Superpathway of glycolysis and the Entner–Doudoroff pathway	Fiber	-0.00446	0.018376	0.808234	0.993909
GLYCOLYSIS-PWY Glycolysis I (from glucose-6-phosphate)	Fiber	0.004136	0.018604	0.824175	0.993909
ILEUSYN-PWY L-isoleucine biosynthesis I (from threonine)	Fiber	0.002606	0.014281	0.855261	0.993909
P441-PWY Superpathway of N-acetylneuraminate degradation	Fiber	-0.00525	0.024637	0.831231	0.993909
PWY-5121 Superpathway of geranylgeranyl diphosphate biosynthesis II (via MEP)	Fiber	0.005484	0.020492	0.789118	0.993909
PWY-5659 GDP-mannose biosynthesis	Fiber	-0.00415	0.015993	0.795516	0.993909
PWY-5686 UMP biosynthesis I	Fiber	-0.00203	0.0139	0.883918	0.993909
PWY-5941 Glycogen degradation II	Fiber	0.002111	0.014857	0.887093	0.993909
PWY-6151 S-adenosyl-L-methionine salvage I	Fiber	0.002965	0.013913	0.831351	0.993909
PWY-6608 Guanosine nucleotides degradation III	Fiber	0.005472	0.020561	0.790237	0.993909
PWY-6628 Superpathway of L-phenylalanine biosynthesis	Fiber	0.003071	0.020075	0.878489	0.993909
PWY-6629 Superpathway of L-tryptophan biosynthesis	Fiber	0.003173	0.013418	0.813156	0.993909
PWY-6897 Thiamine diphosphate salvage II	Fiber	-0.00395	0.015203	0.795166	0.993909
PWY-6906 Chitin derivatives degradation	Fiber	0.00872	0.037796	0.817641	0.993909
PWY-702 L-methionine biosynthesis II	Fiber	0.007351	0.028758	0.798352	0.993909
PWY-7238 Sucrose biosynthesis II	Fiber	0.003372	0.014359	0.814455	0.993909
PWY-7323 Superpathway of GDP-mannose-derived O-antigen building block biosynthesis	Fiber	-0.00265	0.016971	0.876012	0.993909
PWY-7345 Superpathway of anaerobic sucrose degradation	Fiber	-0.00263	0.01746	0.880195	0.993909
PWY-7383 Anaerobic energy metabolism (invertebrates, cytosol)	Fiber	0.005675	0.031262	0.856024	0.993909
PWY-7664 Oleate biosynthesis IV (anaerobic)	Fiber	-0.0073	0.028021	0.794697	0.993909
PWY-7790 UMP biosynthesis II	Fiber	-0.00203	0.0139	0.883918	0.993909
PWY-7791 UMP biosynthesis III	Fiber	-0.00203	0.0139	0.883918	0.993909
PWY0-1061 Superpathway of L-alanine biosynthesis	Fiber	0.0051	0.037525	0.891956	0.993909
PWY0-862 5Z-dodecenoate biosynthesis I	Fiber	-0.00432	0.028223	0.878343	0.993909
PWY66-399 Gluconeogenesis III	Fiber	-0.00358	0.025283	0.887509	0.993909
RHAMCAT-PWY L-rhamnose degradation I	Fiber	-0.00437	0.016127	0.786305	0.993909
TRNA-CHARGING-PWY tRNA charging	Fiber	-0.00281	0.014117	0.84227	0.993909
DAPLYSINESYN-PWY L-lysine biosynthesis I	Carbohydrates	-0.00183	0.039157	0.962834	0.99396
PWY0-862 5Z-dodecenoate biosynthesis I	Carbohydrates	0.001444	0.031546	0.963498	0.99396
DTDPRHAMSYN-PWY dTDP-β-L-rhamnose biosynthesis	Fiber	0.001848	0.014836	0.900942	0.994144
P41-PWY Pyruvate fermentation to acetate and S-lactate I	Fiber	0.002494	0.019965	0.900627	0.994144
PWY-6282 Palmitoleate biosynthesis I (from 5Z-dodec-5-enoate)	Fiber	-0.00354	0.028325	0.900508	0.994144
PWY-6823 Molybdopterin biosynthesis	Proteins	-0.00066	0.018757	0.971987	0.994615
PWY66-399 Gluconeogenesis III	Calories	-0.00773	0.027449	0.778503	0.995183
PWY-8178 Pentose phosphate pathway, non-oxidative branch II	Sodium	-0.00081	0.014299	0.954799	0.995819
PWY0-862 5Z-dodecenoate biosynthesis I	Sodium	-0.00157	0.024704	0.949318	0.995819
ANAGLYCOLYSIS-PWY Glycolysis III (from glucose)	Fiber	-0.00155	0.013303	0.907458	0.996152
METH-ACETATE-PWY Methanogenesis from acetate	Fiber	-0.00284	0.024756	0.908737	0.996152
PWY-5103 L-isoleucine biosynthesis III	Fiber	0.001658	0.014865	0.911241	0.996152
PWY-5484 Glycolysis II (from fructose-6-phosphate)	Fiber	0.002166	0.018592	0.907293	0.996152
PWY0-1261 Anhydromuropeptides recycling I	Fiber	0.002854	0.023587	0.903731	0.996152
PWY0-1296 Purine ribonucleosides degradation	Cholesterol	-0.00084	0.01355	0.950432	0.996244
PWY-6317 D-galactose degradation I (Leloir pathway)	Carbohydrates	0.000666	0.01662	0.968055	0.996451
PWY-7400 L-arginine biosynthesis IV (archaebacteria)	Carbohydrates	0.000644	0.017626	0.970873	0.996458
PWY-5505 L-glutamate and L-glutamine biosynthesis	Fiber	0.002694	0.025243	0.915042	0.996758
PWY-5941 Glycogen degradation II	Proteins	0.000313	0.015013	0.983366	0.996841
GLYCOLYSIS-PWY Glycolysis I (from glucose-6-phosphate)	Proteins	-0.00022	0.018776	0.990541	0.997112
PWY-1269 CMP-3-deoxy-D-manno-octulosonate biosynthesis	Proteins	0.000318	0.02458	0.989693	0.997112
PWY-6630 Superpathway of L-tyrosine biosynthesis	Cholesterol	0.000878	0.018607	0.962371	0.997245
PWY-5505 L-glutamate and L-glutamine biosynthesis	Sodium	0.001088	0.022402	0.961294	0.997273
PWY-5659 GDP-mannose biosynthesis	Sodium	-0.00061	0.014186	0.965769	0.997273
PWY0-1261 Anhydromuropeptides recycling I	Sodium	-0.001	0.021072	0.962165	0.997273
GLYCOCAT-PWY Glycogen degradation I	Sodium	-0.00058	0.026467	0.982653	0.997447
PWY-1269 CMP-3-deoxy-D-manno-octulosonate biosynthesis	Sodium	0.000803	0.021578	0.970318	0.997447
PWY-5188 Tetrapyrrole biosynthesis I (from glutamate)	Sodium	0.000244	0.017606	0.988958	0.997447
PWY-6470 Peptidoglycan biosynthesis V (β-lactam resistance)	Sodium	-0.00086	0.023991	0.971271	0.997447
GLUCUROCAT-PWY Superpathway of β-D-glucuronoside degradation	Cholesterol	0.000447	0.018523	0.980752	0.997589
PWY-5659 GDP-mannose biosynthesis	Cholesterol	0.00019	0.013911	0.989125	0.997706
ANAEROFRUCAT-PWY Homolactic fermentation	Fiber	0.001464	0.016734	0.930303	0.997902
BRANCHED-CHAIN-AA-SYN-PWY Superpathway of branched-chain amino acid biosynthesis	Fiber	0.001178	0.014189	0.93385	0.997902
PWY-5989 Stearate biosynthesis II (bacteria and plants)	Fiber	0.002568	0.027466	0.925539	0.997902
PWY-6895 Superpathway of thiamine diphosphate biosynthesis II	Fiber	0.001905	0.034235	0.955649	0.997902
PWY-7221 Guanosine ribonucleotides de novo biosynthesis	Fiber	-0.00103	0.014214	0.942293	0.997902
PWY-7328 Superpathway of UDP-glucose-derived O-antigen building block biosynthesis	Fiber	0.001236	0.020779	0.952595	0.997902
PWY-7400 L-arginine biosynthesis IV (archaebacteria)	Fiber	-0.00102	0.016281	0.950059	0.997902
PWY-6629 Superpathway of L-tryptophan biosynthesis	Cholesterol	-5.4e-05	0.011811	0.99637	0.998302
PWY-6385 Peptidoglycan biosynthesis III (mycobacteria)	Fiber	-0.00073	0.014019	0.958621	0.998346
PWY-8004 Entner–Doudoroff pathway I	Fiber	-0.0009	0.019	0.962038	0.998346
PWY-1269 CMP-3-deoxy-D-manno-octulosonate biosynthesis	Carbohydrates	-0.00069	0.026661	0.979444	0.998351
PWY-7328 Superpathway of UDP-glucose-derived O-antigen building block biosynthesis	Carbohydrates	0.000618	0.022989	0.97858	0.998351
PWY66-399 Gluconeogenesis III	Carbohydrates	-0.00078	0.027727	0.977537	0.998351
ARO-PWY Chorismate biosynthesis I	Calories	-0.00331	0.014118	0.81473	0.998373
ASPASN-PWY Superpathway of L-aspartate and L-asparagine biosynthesis	Calories	-0.00158	0.017834	0.929338	0.998373
BIOTIN-BIOSYNTHESIS-PWY Biotin biosynthesis I	Calories	-0.00482	0.028139	0.864159	0.998373
CALVIN-PWY Calvin–Benson–Bassham cycle	Calories	0.002459	0.015525	0.87424	0.998373
COLANSYN-PWY Colanic acid building blocks biosynthesis	Calories	0.002483	0.015136	0.869768	0.998373
COMPLETE-ARO-PWY Superpathway of aromatic amino acid biosynthesis	Calories	-0.00152	0.014154	0.914671	0.998373
DAPLYSINESYN-PWY L-lysine biosynthesis I	Calories	0.005394	0.038783	0.889438	0.998373
DTDPRHAMSYN-PWY dTDP-β-L-rhamnose biosynthesis	Calories	-0.00425	0.016097	0.79179	0.998373
FASYN-ELONG-PWY Fatty acid elongation (saturated)	Calories	-0.00341	0.030444	0.910789	0.998373
GLCMANNANAUT-PWY Superpathway of N-acetylglucosamine, N-acetylmannosamine, and N-acetylneuraminate degradation	Calories	0.00151	0.019017	0.936763	0.998373
GLUCONEO-PWY Gluconeogenesis I	Calories	-0.00452	0.02132	0.832198	0.998373
GLUCOSE1PMETAB-PWY Glucose and glucose-1-phosphate degradation	Calories	-0.00718	0.036023	0.842081	0.998373
P441-PWY Superpathway of N-acetylneuraminate degradation	Calories	0.003752	0.026729	0.888428	0.998373
PEPTIDOGLYCANSYN-PWY Peptidoglycan biosynthesis I (meso-diaminopimelate-containing)	Calories	0.000837	0.015502	0.956972	0.998373
PWY-1042 Glycolysis IV	Calories	0.001542	0.015144	0.918918	0.998373
PWY-5686 UMP biosynthesis I	Calories	-0.00091	0.015115	0.951941	0.998373
PWY-5941 Glycogen degradation II	Calories	0.003264	0.016116	0.839597	0.998373
PWY-5989 Stearate biosynthesis II (bacteria and plants)	Calories	0.004351	0.030437	0.886393	0.998373
PWY-6122 5-aminoimidazole ribonucleotide biosynthesis II	Calories	-0.00248	0.014773	0.86686	0.998373
PWY-6163 Chorismate biosynthesis from 3-dehydroquinate	Calories	-0.00363	0.014415	0.801276	0.998373
PWY-6168 Flavin biosynthesis III (fungi)	Calories	-0.00941	0.039338	0.811025	0.998373
PWY-6277 Superpathway of 5-aminoimidazole ribonucleotide biosynthesis	Calories	-0.00248	0.014773	0.86686	0.998373
PWY-6608 Guanosine nucleotides degradation III	Calories	-0.00312	0.022346	0.889096	0.998373
PWY-6609 Adenine and adenosine salvage III	Calories	-0.0022	0.015065	0.883994	0.998373
PWY-6628 Superpathway of L-phenylalanine biosynthesis	Calories	-0.00446	0.021955	0.839037	0.998373
PWY-6700 Queuosine biosynthesis I (de novo)	Calories	0.002366	0.015496	0.878716	0.998373
PWY-6892 Thiazole component of thiamine diphosphate biosynthesis I	Calories	-0.0019	0.017948	0.915613	0.998373
PWY-6895 Superpathway of thiamine diphosphate biosynthesis II	Calories	-0.00803	0.036652	0.82672	0.998373
PWY-6897 Thiamine diphosphate salvage II	Calories	-0.00399	0.01639	0.807849	0.998373
PWY-6902 Chitin degradation II (Vibrio)	Calories	0.008567	0.035054	0.807039	0.998373
PWY-6906 Chitin derivatives degradation	Calories	-0.00926	0.042198	0.826473	0.998373
PWY-702 L-methionine biosynthesis II	Calories	0.006572	0.030875	0.831546	0.998373
PWY-7111 Pyruvate fermentation to isobutanol (engineered)	Calories	0.004281	0.018727	0.819274	0.998373
PWY-7221 Guanosine ribonucleotides de novo biosynthesis	Calories	-0.00273	0.015544	0.86081	0.998373
PWY-7238 Sucrose biosynthesis II	Calories	0.002047	0.015553	0.895364	0.998373
PWY-7790 UMP biosynthesis II	Calories	-0.00091	0.015115	0.951941	0.998373
PWY-7791 UMP biosynthesis III	Calories	-0.00091	0.015115	0.951941	0.998373
PWY-I9 L-cysteine biosynthesis VI (from L-methionine)	Calories	-0.00508	0.038385	0.894857	0.998373
PWY0-1296 Purine ribonucleosides degradation	Calories	0.001421	0.017078	0.933702	0.998373
PWY0-862 5Z-dodecenoate biosynthesis I	Calories	0.001927	0.031252	0.950865	0.998373
RIBOSYN2-PWY Flavin biosynthesis I (bacteria and plants)	Calories	-0.00234	0.014324	0.870356	0.998373
THISYNARA-PWY Superpathway of thiamine diphosphate biosynthesis III (eukaryotes)	Calories	0.002216	0.018109	0.902669	0.998373
TRNA-CHARGING-PWY tRNA charging	Calories	-0.00219	0.01544	0.88716	0.998373
VALSYN-PWY L-valine biosynthesis	Calories	0.000741	0.014635	0.959665	0.998373
ANAEROFRUCAT-PWY Homolactic fermentation	Fats	0.000599	0.017072	0.972011	0.998592
ANAGLYCOLYSIS-PWY Glycolysis III (from glucose)	Fats	0.001785	0.013578	0.895435	0.998592
ARO-PWY Chorismate biosynthesis I	Fats	-0.00097	0.013456	0.942705	0.998592
ASPASN-PWY Superpathway of L-aspartate and L-asparagine biosynthesis	Fats	0.00255	0.016772	0.879235	0.998592
BRANCHED-CHAIN-AA-SYN-PWY Superpathway of branched-chain amino acid biosynthesis	Fats	-0.00143	0.014595	0.921967	0.998592
CALVIN-PWY Calvin–Benson–Bassham cycle	Fats	0.000226	0.014704	0.987732	0.998592
CITRULBIO-PWY L-citrulline biosynthesis	Fats	0.000483	0.022228	0.98269	0.998592
COA-PWY-1 Superpathway of coenzyme A biosynthesis III (mammals)	Fats	-0.00211	0.013597	0.87674	0.998592
COA-PWY Coenzyme A biosynthesis I (prokaryotic)	Fats	-0.0027	0.01372	0.844324	0.998592
COMPLETE-ARO-PWY Superpathway of aromatic amino acid biosynthesis	Fats	0.002079	0.013484	0.877542	0.998592
DAPLYSINESYN-PWY L-lysine biosynthesis I	Fats	0.006465	0.036475	0.859395	0.998592
DTDPRHAMSYN-PWY dTDP-β-L-rhamnose biosynthesis	Fats	-0.00224	0.015229	0.88322	0.998592
FERMENTATION-PWY Mixed-acid fermentation	Fats	0.007021	0.022602	0.756214	0.998592
GALACTUROCAT-PWY D-galacturonate degradation I	Fats	0.000848	0.021752	0.968937	0.998592
GLCMANNANAUT-PWY Superpathway of N-acetylglucosamine, N-acetylmannosamine, and N-acetylneuraminate degradation	Fats	0.002978	0.018159	0.869788	0.998592
GLYCOLYSIS-PWY Glycolysis I (from glucose-6-phosphate)	Fats	0.000877	0.019029	0.963273	0.998592
HISDEG-PWY L-histidine degradation I	Fats	-0.00648	0.024813	0.794161	0.998592
ILEUSYN-PWY L-isoleucine biosynthesis I (from threonine)	Fats	-0.00103	0.014704	0.944334	0.998592
NAGLIPASYN-PWY Lipid IVA biosynthesis (E. coli)	Fats	0.001168	0.029403	0.96832	0.998592
NONMEVIPP-PWY Methylerythritol phosphate pathway I	Fats	-0.00155	0.013859	0.911015	0.998592
NONOXIPENT-PWY Pentose phosphate pathway, non-oxidative branch I	Fats	0.005361	0.01751	0.759631	0.998592
P441-PWY Superpathway of N-acetylneuraminate degradation	Fats	-0.0008	0.025289	0.974923	0.998592
PANTO-PWY Phosphopantothenate biosynthesis I	Fats	-0.00314	0.013569	0.817031	0.998592
PANTOSYN-PWY Superpathway of coenzyme A biosynthesis I (bacteria)	Fats	-0.00434	0.013387	0.746022	0.998592
PENTOSE-P-PWY Pentose phosphate pathway	Fats	-0.00191	0.015777	0.903585	0.998592
PEPTIDOGLYCANSYN-PWY Peptidoglycan biosynthesis I (meso-diaminopimelate-containing)	Fats	0.000728	0.014617	0.960276	0.998592
PWY-1042 Glycolysis IV	Fats	0.000676	0.014301	0.962332	0.998592
PWY-1269 CMP-3-deoxy-D-manno-octulosonate biosynthesis	Fats	0.002956	0.02497	0.905807	0.998592
PWY-3001 Superpathway of L-isoleucine biosynthesis I	Fats	-0.00321	0.013937	0.817891	0.998592
PWY-4041 γ-glutamyl cycle	Fats	0.007262	0.026054	0.780581	0.998592
PWY-4984 Urea cycle	Fats	0.001511	0.024521	0.950892	0.998592
PWY-5030 L-histidine degradation III	Fats	0.00467	0.029126	0.872687	0.998592
PWY-5097 L-lysine biosynthesis VI	Fats	-0.00184	0.01408	0.896225	0.998592
PWY-5103 L-isoleucine biosynthesis III	Fats	-0.00215	0.01533	0.888718	0.998592
PWY-5154 L-arginine biosynthesis III (via N-acetyl-L-citrulline)	Fats	0.00038	0.01882	0.98388	0.998592
PWY-5484 Glycolysis II (from fructose-6-phosphate)	Fats	0.000543	0.019031	0.977261	0.998592
PWY-5667 CDP-diacylglycerol biosynthesis I	Fats	-0.00256	0.012933	0.843031	0.998592
PWY-5686 UMP biosynthesis I	Fats	0.000772	0.014282	0.956913	0.998592
PWY-5941 Glycogen degradation II	Fats	0.004966	0.015248	0.744798	0.998592
PWY-6121 5-aminoimidazole ribonucleotide biosynthesis I	Fats	-0.00369	0.013533	0.785261	0.998592
PWY-6122 5-aminoimidazole ribonucleotide biosynthesis II	Fats	-0.00105	0.013986	0.940167	0.998592
PWY-6147 6-hydroxymethyl-dihydropterin diphosphate biosynthesis I	Fats	-0.00195	0.021657	0.928333	0.998592
PWY-6163 Chorismate biosynthesis from 3-dehydroquinate	Fats	-0.00018	0.013695	0.989273	0.998592
PWY-6277 Superpathway of 5-aminoimidazole ribonucleotide biosynthesis	Fats	-0.00105	0.013986	0.940167	0.998592
PWY-6386 UDP-N-acetylmuramoyl-pentapeptide biosynthesis II (lysine-containing)	Fats	0.000269	0.014502	0.985195	0.998592
PWY-6387 UDP-N-acetylmuramoyl-pentapeptide biosynthesis I (meso-diaminopimelate-containing)	Fats	-0.00038	0.014545	0.979203	0.998592
PWY-6507 4-deoxy-L-threo-hex-4-enopyranuronate degradation	Fats	-0.00617	0.021291	0.772022	0.998592
PWY-6609 Adenine and adenosine salvage III	Fats	0.000425	0.014246	0.9762	0.998592
PWY-6628 Superpathway of L-phenylalanine biosynthesis	Fats	-0.00618	0.020675	0.76515	0.998592
PWY-6700 Queuosine biosynthesis I (de novo)	Fats	0.003839	0.014638	0.79324	0.998592
PWY-6703 preQ₀ biosynthesis	Fats	-0.0033	0.015687	0.833362	0.998592
PWY-6823 Molybdopterin biosynthesis	Fats	0.00352	0.019064	0.853601	0.998592
PWY-6897 Thiamine diphosphate salvage II	Fats	0.001927	0.015566	0.901539	0.998592
PWY-6901 Superpathway of glucose and xylose degradation	Fats	-0.00449	0.014463	0.75628	0.998592
PWY-7111 Pyruvate fermentation to isobutanol (engineered)	Fats	0.000982	0.017677	0.955704	0.998592
PWY-7117 C4 photosynthetic carbon assimilation cycle (PEPCK type)	Fats	0.007521	0.043119	0.861604	0.998592
PWY-7221 Guanosine ribonucleotides de novo biosynthesis	Fats	-0.00242	0.014638	0.868848	0.998592
PWY-7238 Sucrose biosynthesis II	Fats	0.002907	0.014729	0.843656	0.998592
PWY-7242 D-fructuronate degradation	Fats	-0.00375	0.022327	0.866571	0.998592
PWY-7328 Superpathway of UDP-glucose-derived O-antigen building block biosynthesis	Fats	0.006083	0.021414	0.77649	0.998592
PWY-7560 Methylerythritol phosphate pathway II	Fats	-0.00235	0.016559	0.887357	0.998592
PWY-7761 NAD salvage pathway II (PNC IV cycle)	Fats	-0.00795	0.030234	0.792693	0.998592
PWY-7790 UMP biosynthesis II	Fats	0.000772	0.014282	0.956913	0.998592
PWY-7791 UMP biosynthesis III	Fats	0.000772	0.014282	0.956913	0.998592
PWY-7851 Coenzyme A biosynthesis II (eukaryotic)	Fats	-0.00184	0.013674	0.893156	0.998592
PWY-7953 UDP-N-acetylmuramoyl-pentapeptide biosynthesis III (meso-diaminopimelate-containing)	Fats	-0.00015	0.014443	0.991507	0.998592
PWY-8073 Lipid IVA biosynthesis (Pseudomonas putida)	Fats	0.001168	0.029403	0.96832	0.998592
PWY-8178 Pentose phosphate pathway, non-oxidative branch II	Fats	0.002685	0.016564	0.871301	0.998592
PWY-8187 L-arginine degradation XIII (reductive Stickland reaction)	Fats	0.003397	0.022642	0.880799	0.998592
PWY0-1296 Purine ribonucleosides degradation	Fats	-0.0031	0.016104	0.847225	0.998592
PWY0-1319 CDP-diacylglycerol biosynthesis II	Fats	-0.00256	0.012933	0.842916	0.998592
PWY0-1586 Peptidoglycan maturation (meso-diaminopimelate-containing)	Fats	0.002022	0.015427	0.895786	0.998592
PWY0-162 Superpathway of pyrimidine ribonucleotides de novo biosynthesis	Fats	0.002876	0.01887	0.878934	0.998592
PWY4FS-7 Phosphatidylglycerol biosynthesis I (plastidic)	Fats	0.005964	0.021331	0.779907	0.998592
PWY4FS-8 Phosphatidylglycerol biosynthesis II (non-plastidic)	Fats	0.005964	0.021331	0.7799	0.998592
PWY66-429 Fatty acid biosynthesis initiation (mitochondria)	Fats	-0.00024	0.012844	0.985098	0.998592
RHAMCAT-PWY L-rhamnose degradation I	Fats	-0.00028	0.016498	0.986405	0.998592
RIBOSYN2-PWY Flavin biosynthesis I (bacteria and plants)	Fats	-0.00142	0.013719	0.91788	0.998592
THISYN-PWY Superpathway of thiamine diphosphate biosynthesis I	Fats	-0.00602	0.01857	0.745774	0.998592
TRNA-CHARGING-PWY tRNA charging	Fats	-0.00136	0.014539	0.925246	0.998592
VALSYN-PWY L-valine biosynthesis	Fats	0.000827	0.013841	0.952354	0.998592
PWY-7117 C4 photosynthetic carbon assimilation cycle (PEPCK type)	Sugar	0.00199	0.043133	0.963227	0.998769
PWY-6386 UDP-N-acetylmuramoyl-pentapeptide biosynthesis II (lysine-containing)	Fiber	-0.00058	0.014098	0.967009	0.998778
PWY-7560 Methylerythritol phosphate pathway II	Fiber	-0.00068	0.016171	0.96628	0.998778
PWY0-1296 Purine ribonucleosides degradation	Fiber	0.000644	0.015653	0.967212	0.998778
ANAGLYCOLYSIS-PWY Glycolysis III (from glucose)	Calories	-0.00058	0.014238	0.967291	0.998816
PWY-1269 CMP-3-deoxy-D-manno-octulosonate biosynthesis	Calories	0.000934	0.026398	0.971783	0.998816
PWY-6282 Palmitoleate biosynthesis I (from 5Z-dodec-5-enoate)	Calories	0.000728	0.031323	0.981462	0.998816
PWY-6385 Peptidoglycan biosynthesis III (mycobacteria)	Calories	-0.00027	0.015246	0.985768	0.998816
PWY-6387 UDP-N-acetylmuramoyl-pentapeptide biosynthesis I (meso-diaminopimelate-containing)	Calories	-0.00038	0.015416	0.9802	0.998816
PWY-6519 8-amino-7-oxononanoate biosynthesis I	Calories	-0.00059	0.029675	0.984029	0.998816
PWY-6823 Molybdopterin biosynthesis	Calories	0.000471	0.020176	0.981393	0.998816
PWY-7282 4-amino-2-methyl-5-diphosphomethylpyrimidine biosynthesis II	Calories	0.000522	0.021726	0.980847	0.998816
PWY-7664 Oleate biosynthesis IV (anaerobic)	Calories	-0.00124	0.030935	0.967947	0.998816
PWY-7953 UDP-N-acetylmuramoyl-pentapeptide biosynthesis III (meso-diaminopimelate-containing)	Calories	-0.00031	0.015291	0.983757	0.998816
PWY-7234 Inosine-5′-phosphate biosynthesis III	Sugar	0.000892	0.023453	0.969667	0.998948
PWY-7560 Methylerythritol phosphate pathway II	Calories	-0.00018	0.017446	0.991638	0.999018
PWY-7328 Superpathway of UDP-glucose-derived O-antigen building block biosynthesis	Sugar	-0.00061	0.021421	0.977372	0.999152
PWY-6386 UDP-N-acetylmuramoyl-pentapeptide biosynthesis II (lysine-containing)	Calories	-1.5e-05	0.015374	0.999197	0.999197
GLYCOCAT-PWY Glycogen degradation I	Carbohydrates	0.000447	0.032947	0.989188	0.999228
METH-ACETATE-PWY Methanogenesis from acetate	Carbohydrates	-0.00039	0.026734	0.988441	0.999228
TRPSYN-PWY L-tryptophan biosynthesis	Carbohydrates	-0.00017	0.015847	0.991576	0.999228
PEPTIDOGLYCANSYN-PWY Peptidoglycan biosynthesis I (meso-diaminopimelate-containing)	Fiber	0.000351	0.014206	0.980306	0.999236
PHOSLIPSYN-PWY Superpathway of phospholipid biosynthesis I (bacteria)	Fiber	0.00044	0.019171	0.98168	0.999236
PWY-1042 Glycolysis IV	Fiber	-0.00013	0.013914	0.992405	0.999236
PWY-6168 Flavin biosynthesis III (fungi)	Fiber	0.000885	0.036199	0.980497	0.999236
PWY-6700 Queuosine biosynthesis I (de novo)	Fiber	-0.00014	0.014247	0.992214	0.999236
PWY-7282 4-amino-2-methyl-5-diphosphomethylpyrimidine biosynthesis II	Fiber	-0.00019	0.020037	0.992617	0.999236
PWY-7953 UDP-N-acetylmuramoyl-pentapeptide biosynthesis III (meso-diaminopimelate-containing)	Fiber	0.000303	0.014055	0.982788	0.999236
PWY-6387 UDP-N-acetylmuramoyl-pentapeptide biosynthesis I (meso-diaminopimelate-containing)	Fiber	-6.2e-05	0.014142	0.996493	0.999303
GLUCUROCAT-PWY Superpathway of β-D-glucuronoside degradation	Fats	0.00013	0.021522	0.995187	0.999327
PWY-6385 Peptidoglycan biosynthesis III (mycobacteria)	Fats	-1.4e-05	0.014404	0.999205	0.999327
PWY-7383 Anaerobic energy metabolism (invertebrates, cytosol)	Fats	-5.2e-05	0.032426	0.998729	0.999327
RHAMCAT-PWY L-rhamnose degradation I	Proteins	-1.2e-05	0.016277	0.999419	0.999574
PWY-I9 L-cysteine biosynthesis VI (from L-methionine)	Fiber	-3.2e-05	0.03567	0.99929	0.999616
PWY-6282 Palmitoleate biosynthesis I (from 5Z-dodec-5-enoate)	Carbohydrates	-0.00013	0.031619	0.996847	0.999924

## Sheet: Table S6
Supplementary Table 6: Associations between habitual food intake and gut microbial species abundance.
Associations between habitual food intake frequencies derived from food frequency questionnaires (FFQs) and gut microbial species abundance were assessed using linear mixed-effects models. Analyses were restricted to species with a prevalence ≥20% and relative abundance ≥0.1%. Models were adjusted for DNA concentration, sequencing depth, age, BMI, Bristol stool scale, center, batch, timing of sam…
Species	Food habit from FFQ	Beta	Standard error	P-value	Q-value
Lawsonibacter asaccharolyticus	Coffee ffq	0.463817	0.07629	9.78E-09	1.38E-05
Streptococcus thermophilus	Yogurt ffq	0.344087	0.0825	5.25E-05	0.006754
Lachnospira sp NSJ 43	Spirits ffq	0.312682	0.079217	0.000121	0.010712
Bacteroides caccae	Pasta or rice ffq	-0.35135	0.1034	0.000867	0.041812
Clostridium sp AF36 4	Fruit ffq	0.369956	0.115736	0.001692	0.061432
Lawsonibacter asaccharolyticus	Yogurt ffq	0.256437	0.080793	0.001825	0.063464
Dorea formicigenerans	Vegetables ffq	-0.20936	0.066005	0.001821	0.064662
Phocaeicola vulgatus	Red meat ffq	0.521811	0.163364	0.001702	0.066946
Coprococcus comes	Whole milk ffq	0.251493	0.080177	0.002051	0.070232
Clostridium sp AF36 4	Whole milk ffq	0.333835	0.108615	0.002504	0.080799
Eubacterium ventriosum	Whole milk ffq	0.214697	0.072104	0.003381	0.097703
GGB51647 SGB4348	Vegetables ffq	0.427357	0.145007	0.003685	0.104366
Parabacteroides distasonis	White meat ffq	0.255223	0.086939	0.00385	0.109025
GGB3175 SGB4191	Vegetables ffq	0.312514	0.108721	0.004602	0.116374
Bacteroides stercoris	White meat ffq	0.469342	0.166689	0.005513	0.130512
Anaerobutyricum hallii	White meat ffq	0.252144	0.089664	0.005574	0.130512
Phocaeicola massiliensis	Red meat ffq	0.409916	0.146535	0.005813	0.133679
Phocaeicola vulgatus	Fish ffq	0.465896	0.165005	0.005383	0.137773
GGB6606 SGB9340	Wine ffq	-0.23929	0.086729	0.006494	0.139324
Odoribacter splanchnicus	Vegetables ffq	-0.19792	0.074079	0.008339	0.157242
GGB6606 SGB9340	Beer ffq	-0.22369	0.083248	0.007972	0.161242
Alistipes communis	Coffee ffq	0.246884	0.093027	0.0088	0.163956
Blautia massiliensis	Vegetables ffq	-0.2929	0.111704	0.009585	0.165825
Dorea longicatena	Spirits ffq	0.260651	0.099013	0.009358	0.17435
Blautia SGB4815	Whole milk ffq	0.226289	0.085934	0.009328	0.174509
Lachnospira sp NSJ 43	Whole milk ffq	0.215325	0.082904	0.010334	0.178458
Gemmiger formicilis	White meat ffq	-0.28219	0.10926	0.01074	0.178787
Alistipes ihumii	Coffee ffq	0.211837	0.081681	0.010444	0.181587
Blautia sp MCC283	Spirits ffq	0.314513	0.120428	0.009906	0.181795
Clostridium sp AF36 4	Red meat ffq	-0.28262	0.110846	0.011754	0.198132
Roseburia faecis	Pasta or rice ffq	0.376605	0.148409	0.012165	0.210076
Odoribacter splanchnicus	Fish ffq	0.172185	0.069959	0.014983	0.218714
Clostridium fessum	Fruit ffq	0.19302	0.077319	0.01363	0.220462
Parabacteroides distasonis	Red meat ffq	0.209797	0.086119	0.015989	0.222606
Candidatus Cibionibacter quicibialis	Vegetables ffq	-0.29152	0.119914	0.016147	0.226377
GGB9708 SGB15234	Whole milk ffq	0.262477	0.109565	0.017806	0.231309
Clostridium sp AM49 4BH	Whole milk ffq	0.226751	0.094504	0.017663	0.231309
Bacteroides ovatus	Butter ffq	0.303622	0.126126	0.017278	0.234478
Bilophila wadsworthia	Wine ffq	-0.22775	0.09342	0.015923	0.234863
Faecalibacterium SGB15346	Fish ffq	0.259309	0.107714	0.017285	0.235245
Parabacteroides merdae	Cold cuts ffq	-0.27268	0.113189	0.017188	0.2363
Oscillibacter sp MSJ 31	Olive oil ffq	-0.28122	0.115622	0.016071	0.237425
Flavonifractor plautii	Bread ffq	-0.2587	0.107134	0.016958	0.23775
Dysosmobacter welbionis	Coffee ffq	0.187113	0.079165	0.019366	0.238133
Brotolimicola acetigignens	Eggs ffq	0.309986	0.127867	0.016523	0.238735
Roseburia hominis	Fruit ffq	0.281778	0.116185	0.016496	0.240598
Blautia sp MCC283	Coffee ffq	0.298062	0.127556	0.020758	0.240926
Bacteroides stercoris	Fish ffq	0.392296	0.164828	0.018547	0.241247
Dialister invisus	Whole milk ffq	-0.23878	0.101605	0.020035	0.242478
Odoribacter splanchnicus	White meat ffq	0.169857	0.071183	0.018279	0.243852
Barnesiella intestinihominis	Spirits ffq	0.260483	0.110796	0.020007	0.246437
Oscillibacter sp MSJ 31	Yogurt ffq	-0.24844	0.106301	0.02076	0.247029
Acidaminococcus intestini	Vegetables ffq	-0.21606	0.092901	0.021292	0.251025
Lacrimispora amygdalina	Eggs ffq	0.200504	0.084075	0.018335	0.252045
GGB9342 SGB14306	Eggs ffq	-0.26127	0.109674	0.018431	0.252045
Paraprevotella clara	Eggs ffq	0.214989	0.092132	0.020905	0.25336
Phascolarctobacterium faecium	Pasta or rice ffq	-0.2547	0.109029	0.02079	0.255989
Alistipes shahii	Vegetables ffq	-0.24604	0.107493	0.023378	0.261612
GGB9758 SGB15368	Yogurt ffq	-0.31259	0.13631	0.023232	0.262641
Coprococcus catus	Spirits ffq	0.1331	0.057977	0.02304	0.263106
GGB47687 SGB2286	Coffee ffq	-0.2336	0.103265	0.025129	0.265539
Parabacteroides distasonis	Butter ffq	0.19515	0.084377	0.022088	0.267236
Blautia sp MCC283	Beer ffq	0.275953	0.120929	0.023854	0.267403
Bifidobacterium bifidum	Fruit ffq	-0.21591	0.094107	0.02315	0.268617
Blautia massiliensis	White meat ffq	0.24941	0.108844	0.023321	0.26989
Bacteroides fragilis	Eggs ffq	0.2691	0.119159	0.025326	0.27586
Lawsonibacter asaccharolyticus	Red meat ffq	0.186207	0.082483	0.025386	0.280828
Gemmiger formicilis	Red meat ffq	-0.23939	0.107775	0.02779	0.283063
Odoribacter splanchnicus	Red meat ffq	0.155666	0.070222	0.028118	0.283063
Roseburia inulinivorans	Red meat ffq	0.253759	0.113988	0.027428	0.283063
Lacrimispora amygdalina	Wine ffq	0.188712	0.085014	0.027973	0.287025
Dorea longicatena	Semi skimmed milk ffq	0.229381	0.101819	0.025713	0.288961
Clostridium sp AM22 11AC	Beer ffq	0.181937	0.082271	0.028459	0.289158
Akkermansia muciniphila	Butter ffq	-0.26793	0.121177	0.02859	0.295499
GGB9342 SGB14306	Beer ffq	-0.23372	0.107062	0.030525	0.29559
Paraprevotella clara	White meat ffq	-0.20553	0.094239	0.030728	0.295996
Bacteroides stercoris	Red meat ffq	0.355186	0.1647	0.032608	0.29789
Lawsonibacter asaccharolyticus	Semi skimmed milk ffq	0.180771	0.081932	0.028851	0.303579
Bacteroides clarus	Fish ffq	0.219324	0.101194	0.031762	0.303881
Alistipes communis	Whole milk ffq	0.195964	0.090734	0.032339	0.305275
Paraprevotella clara	Beer ffq	0.193285	0.089773	0.032853	0.306126
Dorea formicigenerans	Semi skimmed milk ffq	0.136008	0.062603	0.031357	0.30834
Akkermansia muciniphila	Whole milk ffq	0.261619	0.123444	0.035722	0.308866
Bacteroides finegoldii	Whole milk ffq	0.189896	0.089384	0.035224	0.308866
GGB3304 SGB4367	Whole milk ffq	0.229902	0.107737	0.034458	0.308866
GGB9342 SGB14306	Yogurt ffq	-0.23687	0.109607	0.032273	0.310871
GGB4571 SGB6317	Bread ffq	0.224918	0.102849	0.030298	0.310888
Parabacteroides merdae	White meat ffq	-0.24685	0.114816	0.033139	0.311978
GGB9635 SGB15106	Spirits ffq	-0.24115	0.113164	0.034718	0.315136
Oscillospiraceae bacterium CLA AA H250	Coffee ffq	0.194552	0.091366	0.034902	0.315622
Roseburia inulinivorans	Coffee ffq	-0.24426	0.116118	0.037064	0.319141
GGB3486 SGB4658	White meat ffq	-0.14634	0.069256	0.036239	0.320201
Ruminococcus gnavus	Fish ffq	-0.2023	0.096502	0.037723	0.320866
Bacteroides finegoldii	Vegetables ffq	-0.20412	0.095137	0.033399	0.321716
Parasutterella excrementihominis	Cold cuts ffq	0.244879	0.114849	0.034599	0.324453
Brotolimicola acetigignens	Fruit ffq	0.286683	0.135942	0.03664	0.328372
Streptococcus salivarius	Butter ffq	-0.21389	0.101784	0.037281	0.328792
Ruminococcus gnavus	Wine ffq	-0.20447	0.097849	0.038322	0.328868
Blautia massiliensis	Fruit ffq	-0.23789	0.113361	0.037516	0.329363
Collinsella aerofaciens	Fruit ffq	-0.20689	0.099355	0.039032	0.33217
GGB9602 SGB15031	Cheese ffq	0.207236	0.099322	0.038632	0.333819
GGB9758 SGB15368	Coffee ffq	-0.28901	0.139986	0.040694	0.335012
Alistipes onderdonkii	Cheese ffq	0.275378	0.132295	0.039063	0.335227
Faecalibacterium sp HTFF	Pasta or rice ffq	0.205609	0.098032	0.037597	0.336643
Lachnospira sp NSJ 43	Coffee ffq	-0.17798	0.086472	0.041308	0.33779
Mediterraneibacter faecis	Fruit ffq	-0.21071	0.10206	0.040647	0.338562
GGB3175 SGB4191	Bread ffq	0.217511	0.104191	0.038519	0.338775
Clostridium sp AM22 11AC	Whole milk ffq	0.170857	0.084111	0.043947	0.342121
Blautia massiliensis	Cold cuts ffq	0.22352	0.108046	0.040277	0.347761
Roseburia intestinalis	Fish ffq	-0.23661	0.115969	0.043081	0.348027
Eubacterium rectale	Wine ffq	0.286916	0.13976	0.041799	0.348157
Bacteroides finegoldii	Pasta or rice ffq	0.187901	0.090894	0.040397	0.3531
GGB6606 SGB9340	Butter ffq	-0.17249	0.084487	0.042909	0.354731
Dorea longicatena	Beer ffq	0.20514	0.099834	0.041603	0.354878
Blautia faecis	Beer ffq	-0.14954	0.072909	0.041926	0.355489
GGB3175 SGB4191	Wine ffq	-0.21507	0.105538	0.043304	0.358591
Bifidobacterium longum	Vegetables ffq	-0.21595	0.107088	0.045433	0.359404
Alistipes shahii	Fish ffq	0.206631	0.10291	0.04642	0.36001
Ruminococcus bromii	Beer ffq	0.298296	0.146974	0.044126	0.362812
GGB3345 SGB4425	Bread ffq	0.173605	0.084948	0.042725	0.364454
Alistipes ihumii	Vegetables ffq	-0.17119	0.086122	0.048587	0.365209
Blautia wexlerae	Vegetables ffq	-0.15757	0.079338	0.048746	0.365209
Acidaminococcus intestini	Spirits ffq	0.172688	0.086227	0.046998	0.366567
Bacteroides eggerthii	Spirits ffq	-0.27389	0.136844	0.047115	0.366567
Acidaminococcus intestini	Fruit ffq	-0.18937	0.094099	0.045958	0.367663
Clostridiales bacterium KLE1615	Fruit ffq	0.167302	0.083464	0.046788	0.370125
GGB9708 SGB15234	Coffee ffq	-0.22575	0.114099	0.049684	0.37028
Lawsonibacter asaccharolyticus	Olive oil ffq	0.184324	0.09092	0.044278	0.370342
Phascolarctobacterium faecium	Fish ffq	0.216388	0.109088	0.049104	0.371825
Alistipes finegoldii	Bread ffq	0.24759	0.122785	0.045518	0.374762
Roseburia intestinalis	Bread ffq	-0.23467	0.11601	0.044892	0.374762
Ruminococcus SGB4421	Coffee ffq	0.200504	0.102238	0.051688	0.375937
Alistipes putredinis	Vegetables ffq	-0.35316	0.181286	0.053115	0.378875
Parabacteroides distasonis	Cold cuts ffq	0.17455	0.087341	0.047457	0.379659
Streptococcus salivarius	Red meat ffq	-0.21006	0.105544	0.048296	0.379931
Parasutterella SGB9260	Pasta or rice ffq	0.178598	0.089032	0.046647	0.381726
Wujia chipingensis	Bread ffq	0.165117	0.082923	0.048348	0.382461
Barnesiella intestinihominis	Vegetables ffq	-0.2331	0.120261	0.054319	0.382668
Ruminococcus SGB4421	Cold cuts ffq	-0.19853	0.100823	0.050765	0.384171
Alistipes ihumii	Bread ffq	-0.15982	0.080736	0.049606	0.38616
Coprococcus eutactus	Bread ffq	0.304568	0.154093	0.049936	0.38616
Coprococcus catus	Cold cuts ffq	-0.11845	0.06044	0.051848	0.388448
GGB9708 SGB15234	Olive oil ffq	-0.23827	0.120656	0.049935	0.388507
Lachnospira pectinoschiza	Vegetables ffq	0.225325	0.117926	0.057912	0.38864
Roseburia intestinalis	Whole milk ffq	0.22436	0.115198	0.053312	0.38912
Phocaeicola dorei	Fish ffq	-0.33703	0.174575	0.055385	0.392858
Candidatus Cibionibacter quicibialis	Olive oil ffq	-0.24297	0.124192	0.052076	0.394329
Oscillospiraceae bacterium	Olive oil ffq	-0.21915	0.11217	0.052453	0.395069
Fusicatenibacter saccharivorans	Vegetables ffq	-0.16383	0.086394	0.059735	0.395253
GGB4571 SGB6317	Beer ffq	0.19448	0.099883	0.053339	0.39669
Phocaeicola vulgatus	White meat ffq	0.331554	0.170211	0.053266	0.39912
Coprococcus comes	Spirits ffq	0.152471	0.080104	0.058879	0.402159
GGB3304 SGB4367	Yogurt ffq	-0.21084	0.10905	0.055068	0.406128
GGB9635 SGB15106	Butter ffq	-0.22307	0.114631	0.053536	0.406585
GGB6606 SGB9340	Eggs ffq	-0.16917	0.08654	0.052372	0.409717
GGB9758 SGB15368	Pasta or rice ffq	-0.27104	0.137915	0.051232	0.409799
Blautia faecis	Wine ffq	-0.14538	0.076204	0.058295	0.410674
Eubacterium ventriosum	Cold cuts ffq	0.143113	0.07452	0.056687	0.411631
Dorea longicatena	Olive oil ffq	0.21481	0.112051	0.056942	0.414109
Alistipes finegoldii	Olive oil ffq	0.255971	0.133579	0.057028	0.414109
Eubacterium siraeum	Coffee ffq	-0.22032	0.116558	0.060646	0.415604
Coprococcus comes	Red meat ffq	0.157472	0.082682	0.058714	0.419891
Ruminococcus gnavus	Beer ffq	-0.17869	0.094356	0.060079	0.420157
Agathobaculum butyriciproducens	Wine ffq	0.121919	0.065064	0.062912	0.421069
GGB47687 SGB2286	Yogurt ffq	0.192162	0.101314	0.059797	0.423362
Wujia chipingensis	Red meat ffq	-0.15764	0.083419	0.060717	0.423525
Lacrimispora amygdalina	Whole milk ffq	0.154949	0.083687	0.066077	0.423612
Bilophila wadsworthia	Cheese ffq	0.173977	0.091149	0.058171	0.423783
Bacteroides finegoldii	Olive oil ffq	-0.18587	0.098148	0.059964	0.426677
GGB9342 SGB14306	Olive oil ffq	-0.22937	0.121741	0.061324	0.428315
Paraprevotella clara	Wine ffq	0.174483	0.094143	0.06576	0.429106
Parabacteroides merdae	Fish ffq	-0.21052	0.11314	0.064707	0.430331
Phocaeicola vulgatus	Wine ffq	0.311066	0.169387	0.068232	0.431324
Collinsella aerofaciens	Butter ffq	0.172329	0.092227	0.063675	0.431408
Dialister invisus	Cold cuts ffq	-0.19522	0.1041	0.062666	0.431916
Faecalibacillus intestinalis	Spirits ffq	0.154931	0.084063	0.067271	0.432978
Lacrimispora amygdalina	Olive oil ffq	0.173338	0.093812	0.06653	0.435141
Roseburia faecis	Butter ffq	0.270833	0.145925	0.065411	0.436229
Parasutterella SGB9260	Spirits ffq	-0.15533	0.086251	0.073711	0.440402
Lachnospira sp NSJ 43	Fruit ffq	0.165987	0.089669	0.066128	0.441316
Streptococcus salivarius	Fruit ffq	0.204138	0.110953	0.067741	0.441337
Dorea formicigenerans	Fruit ffq	-0.123	0.066886	0.067885	0.441337
Parabacteroides distasonis	Bread ffq	-0.16033	0.086977	0.067242	0.442857
Lachnospira sp NSJ 43	Bread ffq	0.156603	0.084811	0.066823	0.442857
Bifidobacterium bifidum	Bread ffq	-0.16537	0.089634	0.067021	0.442857
Flavonifractor plautii	Spirits ffq	-0.18826	0.104996	0.074935	0.442994
Clostridiaceae bacterium	Coffee ffq	-0.14702	0.081926	0.074737	0.443257
Phascolarctobacterium faecium	Yogurt ffq	0.200537	0.109054	0.067887	0.443293
Bacteroides fragilis	Cold cuts ffq	0.223426	0.120485	0.065636	0.444694
Bacteroides uniformis	Yogurt ffq	0.181886	0.099545	0.069625	0.446264
Akkermansia muciniphila	Yogurt ffq	-0.22466	0.12423	0.072608	0.446264
Coprococcus eutactus	Yogurt ffq	-0.27845	0.153592	0.071845	0.446264
Ruminococcus bromii	Yogurt ffq	-0.27531	0.151936	0.071966	0.446264
Bacteroides ovatus	Semi skimmed milk ffq	-0.24094	0.128793	0.063281	0.446618
Alistipes putredinis	Fish ffq	0.318508	0.175505	0.071511	0.447067
Bacteroides thetaiotaomicron	Fruit ffq	0.249718	0.137816	0.071997	0.447137
Lachnospira eligens	Fruit ffq	0.237672	0.13046	0.070512	0.447137
Odoribacter splanchnicus	Wine ffq	0.127573	0.071533	0.076537	0.447835
GGB9602 SGB15031	Vegetables ffq	-0.18781	0.107206	0.08176	0.448728
GGB9758 SGB15368	Olive oil ffq	-0.26065	0.14597	0.075991	0.450222
Roseburia inulinivorans	Whole milk ffq	0.198622	0.112786	0.080231	0.450822
Blautia massiliensis	Eggs ffq	-0.19713	0.107124	0.067656	0.451204
Oscillibacter sp MSJ 31	Eggs ffq	-0.19531	0.107048	0.070023	0.451204
GGB47687 SGB2286	Cold cuts ffq	0.186941	0.102349	0.069777	0.451252
Coprococcus comes	Yogurt ffq	-0.14727	0.082492	0.076244	0.453617
Oscillospiraceae bacterium CLA AA H250	Cheese ffq	0.162568	0.088106	0.067026	0.453621
Streptococcus salivarius	Cheese ffq	-0.18614	0.103323	0.07357	0.454859
Collinsella aerofaciens	Cheese ffq	0.166776	0.092654	0.073882	0.454859
Roseburia hominis	Pasta or rice ffq	-0.20863	0.111542	0.06335	0.455345
Bacteroides cellulosilyticus	Fish ffq	0.225223	0.126763	0.07762	0.458892
Simiaoa sunii	Coffee ffq	0.24672	0.140975	0.082225	0.460198
Bacteroides uniformis	Butter ffq	0.173642	0.097667	0.077423	0.460798
Ruminococcus callidus	Butter ffq	0.156022	0.087896	0.077882	0.460798
Alistipes onderdonkii	Wine ffq	-0.23967	0.137173	0.082617	0.462392
Lachnospira sp NSJ 43	Wine ffq	0.150319	0.085962	0.082409	0.462392
Candidatus Cibionibacter quicibialis	White meat ffq	-0.21022	0.116624	0.07345	0.463137
Roseburia faecis	Eggs ffq	0.265317	0.149253	0.077426	0.466532
Alistipes putredinis	Whole milk ffq	0.298839	0.172955	0.086009	0.466625
Alistipes finegoldii	Whole milk ffq	-0.20952	0.121464	0.086547	0.467748
Odoribacter splanchnicus	Cheese ffq	0.122183	0.069218	0.079556	0.468588
Coprococcus catus	Cheese ffq	-0.10371	0.059038	0.080981	0.468588
Bacteroides fragilis	Red meat ffq	-0.21174	0.120222	0.080169	0.471034
Parasutterella SGB9260	Beer ffq	-0.15016	0.086293	0.083828	0.471192
Wujia chipingensis	Spirits ffq	-0.1399	0.081085	0.08653	0.471255
Faecalibacterium SGB15346	Fruit ffq	0.200163	0.114654	0.082897	0.471416
Sutterella wadsworthensis	Fruit ffq	-0.23469	0.135173	0.084538	0.474288
Gemmiger formicilis	Semi skimmed milk ffq	0.189173	0.107599	0.080708	0.474502
Lachnospira pectinoschiza	Wine ffq	0.19419	0.11276	0.087139	0.474572
Dysosmobacter welbionis	Semi skimmed milk ffq	0.135931	0.077806	0.082603	0.475471
Streptococcus thermophilus	Coffee ffq	0.152946	0.088881	0.087385	0.475751
Roseburia faecis	Vegetables ffq	0.269961	0.158287	0.090044	0.475752
Dorea formicigenerans	Butter ffq	0.10756	0.061894	0.084306	0.4772
Blautia faecis	Pasta or rice ffq	-0.13616	0.075538	0.073428	0.478909
Odoribacter splanchnicus	Whole milk ffq	0.118635	0.069841	0.09144	0.479587
Parabacteroides distasonis	Yogurt ffq	-0.14903	0.086724	0.087751	0.479749
Ruminococcus gnavus	Yogurt ffq	-0.16499	0.096526	0.089472	0.481445
Bacteroides caccae	Semi skimmed milk ffq	0.182726	0.105127	0.08419	0.482645
GGB33469 SGB15236	Pasta or rice ffq	-0.15561	0.087541	0.077439	0.483925
Coprococcus catus	Red meat ffq	-0.10426	0.060346	0.086022	0.48529
Oscillospiraceae bacterium	Whole milk ffq	0.169112	0.100963	0.09601	0.485554
Streptococcus salivarius	Yogurt ffq	0.17728	0.104422	0.091648	0.486043
Phocaeicola massiliensis	White meat ffq	0.264225	0.152102	0.084377	0.486051
Alistipes onderdonkii	Olive oil ffq	-0.24959	0.146187	0.089592	0.486062
Lachnospira sp NSJ 43	Olive oil ffq	0.159153	0.093001	0.088943	0.486062
Wujia chipingensis	Olive oil ffq	-0.15736	0.092107	0.0895	0.486062
Alistipes putredinis	White meat ffq	0.30981	0.178837	0.085234	0.486657
Simiaoa sunii	Eggs ffq	-0.23883	0.13806	0.085734	0.487545
Ruminococcus callidus	Cheese ffq	0.151729	0.088188	0.087346	0.48886
Bilophila wadsworthia	White meat ffq	0.163588	0.094674	0.086046	0.489319
Clostridiales bacterium KLE1615	Pasta or rice ffq	0.139109	0.07955	0.082338	0.489877
Phocaeicola dorei	Vegetables ffq	0.301944	0.180846	0.096918	0.491883
GGB3175 SGB4191	Beer ffq	-0.17278	0.101451	0.090559	0.493859
Eubacterium rectale	Vegetables ffq	-0.24318	0.146434	0.098748	0.495839
Bacteroides uniformis	Olive oil ffq	0.183923	0.109	0.093398	0.497502
GGB6606 SGB9340	Olive oil ffq	-0.1597	0.095306	0.095656	0.497808
Dorea longicatena	Butter ffq	0.171301	0.101338	0.093046	0.500965
Simiaoa sunii	Semi skimmed milk ffq	0.233609	0.137303	0.090976	0.501252
Lawsonibacter asaccharolyticus	Wine ffq	0.140646	0.083909	0.095795	0.502391
Clostridium fessum	Wine ffq	0.125023	0.07487	0.097036	0.503308
Bacteroides thetaiotaomicron	Eggs ffq	0.219884	0.130143	0.093155	0.503465
GGB9602 SGB15031	Olive oil ffq	-0.18388	0.110748	0.098793	0.50502
Clostridium sp AF36 4	White meat ffq	-0.1942	0.113958	0.090407	0.505992
Coprococcus comes	Wine ffq	0.139645	0.083899	0.098101	0.506976
Coprococcus catus	Semi skimmed milk ffq	0.101122	0.059786	0.092784	0.507265
Bacteroides eggerthii	Whole milk ffq	0.228845	0.139745	0.103544	0.507494
GGB9708 SGB15234	Eggs ffq	-0.18619	0.111621	0.097327	0.508186
GGB51647 SGB4348	White meat ffq	-0.2421	0.142874	0.092223	0.508973
Wujia chipingensis	White meat ffq	-0.14349	0.084708	0.092416	0.508973
Coprococcus catus	Whole milk ffq	0.096294	0.059689	0.108744	0.510329
Phocaeicola dorei	White meat ffq	-0.29786	0.178397	0.09704	0.512166
Bacteroides finegoldii	White meat ffq	0.154674	0.092688	0.097222	0.512166
Parabacteroides distasonis	Vegetables ffq	-0.14765	0.091978	0.110407	0.512578
Roseburia hominis	Spirits ffq	0.180071	0.108355	0.098583	0.513214
Oscillibacter sp ER4	Whole milk ffq	0.182136	0.113477	0.110551	0.514937
Paraprevotella clara	Whole milk ffq	0.147976	0.092191	0.110523	0.514937
Clostridium sp AM49 4BH	Yogurt ffq	-0.15811	0.095872	0.101269	0.517676
Coprococcus comes	White meat ffq	0.139794	0.084372	0.09963	0.51866
Paraprevotella clara	Spirits ffq	0.148382	0.090366	0.102633	0.518964
Blautia faecis	Semi skimmed milk ffq	-0.12525	0.074874	0.096391	0.518973
Alistipes finegoldii	Wine ffq	-0.20304	0.124756	0.105686	0.521432
Barnesiella intestinihominis	Pasta or rice ffq	-0.19277	0.115651	0.09762	0.521623
Ruminococcus gnavus	Cold cuts ffq	0.162236	0.097665	0.09876	0.521805
Alistipes putredinis	Coffee ffq	0.291391	0.179547	0.106661	0.523554
Clostridium sp AM22 11AC	Butter ffq	0.137287	0.083387	0.101773	0.523704
Ruminococcus bromii	Spirits ffq	0.239783	0.147963	0.107178	0.524701
GGB9758 SGB15368	Red meat ffq	-0.22735	0.137497	0.100323	0.52583
Bacteroides faecis	Pasta or rice ffq	0.189516	0.11497	0.101401	0.525947
Bacteroides cellulosilyticus	Fruit ffq	0.215153	0.134029	0.110517	0.526847
Bifidobacterium bifidum	Butter ffq	-0.14273	0.087718	0.105804	0.526877
GGB33469 SGB15236	Eggs ffq	-0.14138	0.087185	0.1069	0.526923
GGB9758 SGB15368	Eggs ffq	-0.22034	0.136605	0.108814	0.526923
Bacteroides uniformis	Fruit ffq	0.166082	0.105809	0.118564	0.527465
Parabacteroides merdae	Fruit ffq	0.18861	0.119914	0.117815	0.527465
Barnesiella intestinihominis	Red meat ffq	0.189463	0.115094	0.101797	0.528001
Bifidobacterium bifidum	Cheese ffq	0.145367	0.087843	0.10003	0.528869
Alistipes putredinis	Red meat ffq	0.287337	0.175298	0.103233	0.529702
GGB3175 SGB4191	Red meat ffq	-0.17148	0.104813	0.103868	0.529702
Roseburia faecis	Spirits ffq	-0.23302	0.145295	0.110813	0.530103
GGB1420 SGB1957	Whole milk ffq	0.135276	0.085787	0.116892	0.531306
Lachnospira pectinoschiza	Semi skimmed milk ffq	-0.18062	0.110812	0.105204	0.532824
GGB9708 SGB15234	Vegetables ffq	-0.18518	0.117885	0.118189	0.532978
Lachnospira pectinoschiza	Pasta or rice ffq	0.181774	0.111739	0.105911	0.535607
Clostridium sp AM22 11AC	Spirits ffq	0.13172	0.082889	0.114093	0.538518
Anaerobutyricum hallii	Vegetables ffq	-0.1473	0.094852	0.122427	0.540052
Odoribacter splanchnicus	Cold cuts ffq	0.114177	0.071216	0.110991	0.54008
Parabacteroides merdae	Vegetables ffq	-0.18285	0.118238	0.123929	0.540374
Lacrimispora amygdalina	Butter ffq	0.131392	0.082582	0.113767	0.54038
Gemmiger formicilis	Bread ffq	0.172376	0.108856	0.115377	0.547766
Simiaoa sunii	Bread ffq	-0.21855	0.138402	0.116516	0.547766
Blautia wexlerae	Red meat ffq	0.119405	0.075336	0.115026	0.548969
Alistipes putredinis	Semi skimmed milk ffq	0.276971	0.174099	0.113689	0.549432
GGB47687 SGB2286	Semi skimmed milk ffq	-0.15884	0.101204	0.118623	0.551747
Lawsonibacter asaccharolyticus	Beer ffq	0.127353	0.080686	0.116514	0.551787
Ruminococcus bicirculans	Butter ffq	0.212517	0.137168	0.123467	0.551857
Alistipes onderdonkii	Beer ffq	-0.20719	0.131414	0.116942	0.551966
Anaerostipes hadrus	Red meat ffq	-0.10269	0.065553	0.119245	0.552259
Faecalibacillus intestinalis	Red meat ffq	0.136506	0.08691	0.118333	0.552259
Alistipes communis	Butter ffq	0.139352	0.090302	0.12488	0.552595
Flavonifractor plautii	Yogurt ffq	0.168542	0.10805	0.120898	0.553287
Anaerobutyricum hallii	Butter ffq	0.135101	0.087681	0.12545	0.553386
Lacrimispora amygdalina	Semi skimmed milk ffq	-0.13034	0.084393	0.12459	0.554975
Bifidobacterium pseudocatenulatum	Semi skimmed milk ffq	0.136908	0.08868	0.124726	0.554975
Roseburia hominis	Red meat ffq	-0.17439	0.112113	0.12187	0.55505
Sutterella wadsworthensis	Eggs ffq	0.197067	0.126953	0.122612	0.55647
Lachnospira eligens	Cheese ffq	-0.18808	0.121565	0.12396	0.557229
Flavonifractor plautii	Fruit ffq	-0.17485	0.114713	0.129535	0.559213
GGB3486 SGB4658	Cold cuts ffq	-0.10845	0.069115	0.118681	0.560369
Blautia sp MCC283	Fruit ffq	0.200724	0.133303	0.134197	0.560539
Flavonifractor plautii	Coffee ffq	0.170543	0.1107	0.125518	0.560675
GGB9635 SGB15106	Eggs ffq	-0.17932	0.116384	0.125453	0.561957
Blautia sp MCC283	Wine ffq	0.194139	0.127612	0.130252	0.562252
Alistipes finegoldii	Vegetables ffq	0.192782	0.130145	0.14048	0.562766
Oscillibacter valericigenes	Whole milk ffq	0.142261	0.094845	0.135679	0.564134
Oscillibacter sp ER4	Fruit ffq	0.181626	0.121554	0.137203	0.564716
GGB9708 SGB15234	Cheese ffq	0.168816	0.109975	0.126861	0.564891
Coprococcus eutactus	Spirits ffq	0.228714	0.149769	0.128821	0.565206
Anaerobutyricum hallii	Cold cuts ffq	0.139616	0.090304	0.124176	0.565379
Odoribacter splanchnicus	Coffee ffq	-0.11061	0.072386	0.128613	0.565578
Paraprevotella clara	Cold cuts ffq	-0.14444	0.093946	0.126273	0.567522
Bacteroides xylanisolvens	Whole milk ffq	-0.17534	0.118538	0.141155	0.567812
Brotolimicola acetigignens	Bread ffq	-0.19805	0.129764	0.129104	0.568535
Roseburia inulinivorans	Pasta or rice ffq	0.177189	0.114562	0.124022	0.569437
GGB6606 SGB9340	Spirits ffq	-0.12683	0.084464	0.13522	0.570061
Clostridiaceae bacterium	Red meat ffq	-0.12118	0.080804	0.135741	0.570352
GGB47687 SGB2286	Wine ffq	-0.15492	0.103361	0.136032	0.573279
Bifidobacterium longum	Semi skimmed milk ffq	0.151949	0.101454	0.136251	0.573368
Phocaeicola massiliensis	Pasta or rice ffq	0.230367	0.150058	0.126805	0.573661
GGB1420 SGB1957	Vegetables ffq	-0.13371	0.091404	0.14547	0.573777
Clostridiales bacterium KLE1615	Red meat ffq	-0.11858	0.079744	0.139036	0.575369
Oscillospiraceae bacterium	Red meat ffq	0.151592	0.102425	0.140927	0.578292
Barnesiella intestinihominis	Coffee ffq	0.176891	0.117977	0.135862	0.578624
Roseburia inulinivorans	Cold cuts ffq	0.173322	0.115067	0.134081	0.578838
GGB9699 SGB15216	Beer ffq	-0.12343	0.082047	0.134488	0.580594
Ruminococcus callidus	Red meat ffq	0.132172	0.090131	0.14455	0.580706
Sutterella wadsworthensis	Pasta or rice ffq	-0.19517	0.128669	0.131365	0.580912
Bifidobacterium longum	Fruit ffq	-0.15846	0.108023	0.144465	0.581142
Collinsella aerofaciens	Pasta or rice ffq	0.143607	0.095093	0.133108	0.581172
Clostridiales bacterium KLE1615	Cold cuts ffq	-0.11994	0.07992	0.135502	0.581427
Candidatus Cibionibacter quicibialis	Eggs ffq	-0.17001	0.114663	0.140169	0.583083
GGB9708 SGB15234	Butter ffq	-0.16345	0.109826	0.138791	0.583168
Blautia glucerasea	Cold cuts ffq	-0.1382	0.092485	0.137187	0.583231
Eubacterium rectale	Olive oil ffq	-0.22241	0.151421	0.143781	0.586727
Streptococcus thermophilus	Beer ffq	-0.12838	0.086496	0.139697	0.588059
Anaerobutyricum hallii	Fish ffq	0.132869	0.0898	0.141043	0.589136
Phocaeicola dorei	Eggs ffq	-0.25473	0.173891	0.14495	0.589796
Streptococcus salivarius	Pasta or rice ffq	-0.1582	0.105883	0.137193	0.590474
GGB9602 SGB15031	Fish ffq	-0.15054	0.101981	0.14203	0.591392
Ruminococcus bicirculans	Pasta or rice ffq	0.209318	0.141417	0.140937	0.592187
Ruminococcus bicirculans	Fish ffq	-0.20709	0.140741	0.143285	0.59325
Alistipes finegoldii	Beer ffq	-0.1763	0.119502	0.142158	0.593791
Oscillospiraceae bacterium	Pasta or rice ffq	-0.15168	0.102689	0.141754	0.593859
Anaerobutyricum hallii	Fruit ffq	-0.13707	0.094911	0.150728	0.594186
Acidaminococcus intestini	Whole milk ffq	-0.12482	0.088488	0.160411	0.594613
Bacteroides stercoris	Olive oil ffq	-0.25146	0.173112	0.148211	0.596213
Clostridiaceae bacterium	Fruit ffq	0.121956	0.084983	0.153358	0.596578
GGB9758 SGB15368	Whole milk ffq	0.191905	0.136505	0.161813	0.596684
Parabacteroides distasonis	Olive oil ffq	-0.13751	0.095026	0.149755	0.597009
GGB33469 SGB15236	Olive oil ffq	-0.13772	0.095352	0.150517	0.597009
Oscillibacter sp ER4	Cold cuts ffq	-0.16793	0.115895	0.149407	0.598637
Bacteroides ovatus	Vegetables ffq	0.19323	0.136991	0.160305	0.598922
Anaerobutyricum hallii	Whole milk ffq	0.124591	0.088931	0.163225	0.599677
GGB4571 SGB6317	Fish ffq	0.150791	0.103655	0.147817	0.599755
Ruminococcus lactaris	Pasta or rice ffq	-0.14142	0.096696	0.145657	0.599888
Bacteroides xylanisolvens	Yogurt ffq	0.172517	0.119448	0.150748	0.600552
Faecalibacterium sp HTFF	White meat ffq	-0.14366	0.100173	0.153587	0.600789
Lawsonibacter asaccharolyticus	Spirits ffq	-0.11624	0.080571	0.151183	0.601334
GGB3486 SGB4658	Fruit ffq	0.103747	0.072739	0.155824	0.601809
Bifidobacterium adolescentis	Semi skimmed milk ffq	0.195919	0.134791	0.148131	0.604477
Akkermansia muciniphila	Vegetables ffq	-0.18666	0.133198	0.163124	0.606255
Blautia wexlerae	Wine ffq	0.108104	0.076361	0.158918	0.607939
Mediterraneibacter faecis	Wine ffq	0.140595	0.098549	0.155705	0.607939
GGB9635 SGB15106	Wine ffq	-0.16882	0.119237	0.158898	0.607939
Phocaeicola dorei	Red meat ffq	-0.24527	0.175151	0.16343	0.608242
Bifidobacterium bifidum	Olive oil ffq	-0.13874	0.097568	0.15691	0.608446
Blautia obeum	Bread ffq	-0.15277	0.105501	0.149689	0.608855
Alistipes shahii	Bread ffq	-0.14845	0.103712	0.154374	0.610595
Gemmiger formicilis	Olive oil ffq	-0.16686	0.117969	0.15908	0.61089
Streptococcus thermophilus	Semi skimmed milk ffq	0.126337	0.087381	0.150299	0.611394
Blautia sp MCC283	Butter ffq	-0.17604	0.123379	0.155706	0.611859
Phocaeicola vulgatus	Vegetables ffq	-0.24257	0.174672	0.166812	0.61221
Dorea longicatena	Eggs ffq	0.147929	0.103573	0.15525	0.612352
GGB4552 SGB6276	Red meat ffq	-0.12285	0.088305	0.166159	0.61271
Ruminococcus SGB4421	Vegetables ffq	0.145404	0.105947	0.171835	0.612894
Oscillibacter sp MSJ 31	White meat ffq	-0.15544	0.109662	0.15844	0.613288
Clostridiales bacterium KLE1615	Coffee ffq	-0.11579	0.081187	0.15585	0.614716
Anaerostipes hadrus	Fish ffq	-0.09305	0.06546	0.157202	0.614913
Bacteroides ovatus	Olive oil ffq	0.195585	0.140774	0.166559	0.615209
Blautia sp MCC283	Olive oil ffq	0.191625	0.136498	0.1622	0.615209
Clostridium sp AM49 4BH	Coffee ffq	0.138357	0.098571	0.162547	0.617772
Coprococcus catus	Coffee ffq	0.087539	0.061733	0.158231	0.617772
Ruminococcus bromii	Coffee ffq	0.219588	0.15645	0.162492	0.617772
Faecalicatena fissicatena	Fruit ffq	0.138396	0.099712	0.167176	0.61807
Alistipes communis	Fruit ffq	0.13334	0.097857	0.175014	0.62036
Ruminococcus callidus	Fruit ffq	0.129061	0.09535	0.177872	0.62036
Clostridiales bacterium KLE1615	Vegetables ffq	0.115101	0.084689	0.176048	0.620523
Oscillibacter sp MSJ 31	Vegetables ffq	-0.1545	0.113713	0.176165	0.620523
Anaerobutyricum soehngenii	Bread ffq	-0.18199	0.12893	0.160173	0.621711
Streptococcus salivarius	Beer ffq	-0.14615	0.103174	0.158569	0.62283
GGB4552 SGB6276	Semi skimmed milk ffq	0.124106	0.087497	0.158111	0.624798
Blautia glucerasea	Spirits ffq	0.1253	0.089276	0.162482	0.625201
Lawsonibacter asaccharolyticus	Cheese ffq	0.115057	0.081511	0.160141	0.625349
Bacteroides xylanisolvens	Vegetables ffq	0.170868	0.127226	0.181188	0.625412
Bifidobacterium pseudocatenulatum	Vegetables ffq	-0.1273	0.094636	0.180519	0.625412
Faecalibacterium sp HTFF	Vegetables ffq	0.138337	0.103831	0.18462	0.625412
Parasutterella excrementihominis	Fruit ffq	0.161965	0.121525	0.184595	0.627285
Oscillibacter valericigenes	Olive oil ffq	-0.14317	0.105843	0.178027	0.627894
Dysosmobacter welbionis	Olive oil ffq	0.115069	0.086688	0.186223	0.627894
Coprococcus comes	Pasta or rice ffq	0.115593	0.083413	0.167849	0.628272
Alistipes onderdonkii	Vegetables ffq	-0.18862	0.142881	0.188651	0.629696
GGB9342 SGB14306	Vegetables ffq	-0.15565	0.118049	0.189235	0.629696
Bacteroides thetaiotaomicron	Semi skimmed milk ffq	-0.18154	0.129847	0.164132	0.629841
GGB9635 SGB15106	Semi skimmed milk ffq	0.1634	0.116533	0.162925	0.629841
Lachnospira eligens	Coffee ffq	-0.1739	0.126917	0.172712	0.632208
Akkermansia muciniphila	Coffee ffq	0.175209	0.128391	0.17444	0.632971
Wujia chipingensis	Butter ffq	-0.11352	0.081696	0.166805	0.633517
GGB4552 SGB6276	Cold cuts ffq	-0.12126	0.088542	0.172883	0.635039
Coprococcus eutactus	Fruit ffq	0.213605	0.163813	0.19424	0.635204
Blautia glucerasea	Whole milk ffq	0.119733	0.091108	0.19075	0.635535
GGB51647 SGB4348	Wine ffq	0.193669	0.142778	0.176959	0.635554
Ruminococcus SGB4421	Yogurt ffq	0.138625	0.100413	0.169445	0.636431
GGB3345 SGB4425	White meat ffq	-0.11864	0.086975	0.174564	0.638818
Lachnospira pectinoschiza	White meat ffq	-0.15385	0.11355	0.177521	0.639619
Phocaeicola vulgatus	Whole milk ffq	-0.21578	0.165898	0.19531	0.639811
Alistipes putredinis	Bread ffq	-0.24305	0.176615	0.170781	0.641395
Bifidobacterium adolescentis	Coffee ffq	0.182486	0.139181	0.191785	0.642004
Bilophila wadsworthia	Fish ffq	0.127335	0.093407	0.174826	0.642478
Blautia SGB4815	Fish ffq	-0.11981	0.088252	0.176636	0.642478
Dialister invisus	Olive oil ffq	-0.14489	0.113495	0.203518	0.642602
Oscillibacter sp ER4	Semi skimmed milk ffq	0.157261	0.114238	0.170644	0.642639
Alistipes shahii	Whole milk ffq	0.131897	0.102438	0.199817	0.643047
Simiaoa sunii	Fruit ffq	-0.1886	0.146594	0.200291	0.643111
Barnesiella intestinihominis	Whole milk ffq	0.146419	0.114092	0.201318	0.64349
Bifidobacterium bifidum	Whole milk ffq	0.113812	0.088775	0.20179	0.643546
Wujia chipingensis	Cold cuts ffq	-0.11362	0.084241	0.179505	0.643678
Clostridium fessum	Beer ffq	0.099251	0.071918	0.169581	0.644087
Roseburia intestinalis	Wine ffq	-0.15535	0.118553	0.192077	0.644506
Dorea longicatena	Red meat ffq	-0.13974	0.103802	0.180249	0.644526
Agathobaculum butyriciproducens	Fruit ffq	0.087544	0.068389	0.202501	0.646561
Dialister invisus	Fruit ffq	0.140614	0.109937	0.202821	0.646561
Lachnospira sp NSJ 43	Fish ffq	0.112718	0.085159	0.187669	0.646692
Odoribacter splanchnicus	Butter ffq	0.094252	0.069217	0.175361	0.648334
Faecalicatena fissicatena	Spirits ffq	0.122143	0.091522	0.183984	0.648503
Streptococcus salivarius	Spirits ffq	0.135639	0.102703	0.188549	0.648503
Mediterraneibacter faecis	Spirits ffq	0.125919	0.094393	0.184167	0.648503
Alistipes finegoldii	Spirits ffq	-0.15934	0.119757	0.185316	0.648503
Clostridium sp AF36 4	Semi skimmed milk ffq	-0.14927	0.111612	0.183075	0.649608
Paraprevotella clara	Pasta or rice ffq	-0.12245	0.093792	0.19366	0.65027
Lawsonibacter asaccharolyticus	Whole milk ffq	0.102825	0.082313	0.213526	0.650972
Ruminococcus gnavus	White meat ffq	0.128283	0.099073	0.197357	0.651416
Barnesiella intestinihominis	Olive oil ffq	-0.15602	0.123753	0.209139	0.652294
Clostridiaceae bacterium	Bread ffq	-0.10803	0.0803	0.180584	0.652315
Sutterella wadsworthensis	Beer ffq	0.164467	0.124019	0.186757	0.652963
Ruminococcus callidus	Beer ffq	-0.11847	0.087401	0.17721	0.652963
Acidaminococcus intestini	Beer ffq	0.114933	0.086634	0.186614	0.652963
Bifidobacterium bifidum	Beer ffq	0.11625	0.087013	0.183525	0.652963
Bifidobacterium longum	Fish ffq	-0.13237	0.102494	0.198505	0.653046
Phocaeicola vulgatus	Pasta or rice ffq	-0.21825	0.168773	0.197913	0.653059
Barnesiella intestinihominis	Bread ffq	-0.15462	0.116003	0.184571	0.654095
Acidaminococcus intestini	Bread ffq	-0.11926	0.08984	0.186376	0.654095
Bilophila wadsworthia	Cold cuts ffq	0.123314	0.094112	0.19208	0.654401
GGB9635 SGB15106	Coffee ffq	-0.15472	0.120319	0.200448	0.655506
Anaerobutyricum soehngenii	Olive oil ffq	-0.17665	0.141266	0.212908	0.655612
Collinsella aerofaciens	Vegetables ffq	-0.12547	0.099985	0.211403	0.656463
GGB47687 SGB2286	Spirits ffq	-0.12706	0.099198	0.202194	0.657281
Bacteroides cellulosilyticus	Butter ffq	0.164861	0.124426	0.187193	0.657729
Bacteroides finegoldii	Cold cuts ffq	0.118672	0.092019	0.199137	0.657866
Clostridium sp AF36 4	Eggs ffq	-0.14486	0.112226	0.198707	0.660515
Blautia wexlerae	Eggs ffq	0.100823	0.075377	0.183	0.660515
Eubacterium siraeum	Eggs ffq	-0.15151	0.114776	0.188768	0.660515
Ruminococcus lactaris	Semi skimmed milk ffq	0.123292	0.095908	0.200525	0.660578
GGB51647 SGB4348	Red meat ffq	-0.18138	0.140983	0.200175	0.660717
Bacteroides thetaiotaomicron	Yogurt ffq	0.173785	0.130624	0.18541	0.660867
Bacteroides uniformis	White meat ffq	0.127401	0.102198	0.214452	0.661608
Oscillospiraceae bacterium	White meat ffq	0.129497	0.10429	0.216296	0.661608
Collinsella aerofaciens	White meat ffq	0.121207	0.0966	0.211554	0.661608
Flavonifractor plautii	White meat ffq	0.140029	0.110575	0.20734	0.661608
Lacrimispora amygdalina	Cheese ffq	-0.11103	0.083351	0.184857	0.662186
Roseburia hominis	Cheese ffq	-0.14258	0.109612	0.19533	0.662186
Streptococcus thermophilus	Cheese ffq	-0.11273	0.086048	0.192163	0.662186
Bacteroides finegoldii	Cheese ffq	0.116732	0.089537	0.19429	0.662186
Bilophila wadsworthia	Spirits ffq	-0.1154	0.090744	0.205394	0.6625
Dorea formicigenerans	Whole milk ffq	0.075748	0.063022	0.231261	0.663397
Lacrimispora amygdalina	Fruit ffq	0.111908	0.089758	0.214466	0.66375
GGB9715 SGB15265	Pasta or rice ffq	0.129665	0.10372	0.213171	0.66433
Bifidobacterium bifidum	Eggs ffq	0.114933	0.089463	0.200834	0.66444
Bacteroides caccae	Fruit ffq	-0.13904	0.112554	0.218602	0.66512
Clostridiales bacterium KLE1615	White meat ffq	-0.09956	0.080918	0.220471	0.665644
Blautia wexlerae	Whole milk ffq	0.089508	0.074797	0.233282	0.665984
Roseburia hominis	Bread ffq	-0.14279	0.111333	0.201687	0.666714
Streptococcus thermophilus	Cold cuts ffq	0.111605	0.087743	0.205387	0.667037
GGB51647 SGB4348	Beer ffq	0.176037	0.136568	0.199303	0.66752
Blautia faecis	Bread ffq	-0.09666	0.075725	0.203738	0.667807
Phocaeicola massiliensis	Eggs ffq	-0.18778	0.148062	0.206596	0.667919
Parasutterella excrementihominis	White meat ffq	0.141907	0.117235	0.227983	0.667993
GGB9635 SGB15106	Beer ffq	-0.14611	0.113768	0.201028	0.668391
Dorea longicatena	Vegetables ffq	0.133405	0.109561	0.225163	0.668407
GGB3486 SGB4658	Wine ffq	0.08714	0.069663	0.2129	0.669819
Roseburia hominis	Semi skimmed milk ffq	-0.13938	0.111313	0.212435	0.67031
Mediterraneibacter faecis	Semi skimmed milk ffq	0.120741	0.096683	0.213605	0.67031
Lachnospira sp NSJ 43	Semi skimmed milk ffq	-0.10554	0.08474	0.214892	0.67031
Oscillospiraceae bacterium CLA AA H250	Semi skimmed milk ffq	0.111322	0.089897	0.217536	0.670549
GGB9342 SGB14306	Semi skimmed milk ffq	-0.13581	0.110446	0.22071	0.670549
Dialister invisus	Cheese ffq	-0.12996	0.102015	0.204609	0.670883
Clostridiaceae bacterium	Cheese ffq	-0.10059	0.07907	0.20529	0.671342
Bifidobacterium bifidum	Spirits ffq	0.109362	0.087236	0.211907	0.671454
Faecalicatena fissicatena	Pasta or rice ffq	0.116792	0.094709	0.219411	0.671723
Bilophila wadsworthia	Fruit ffq	0.116524	0.098919	0.240643	0.672267
Oscillibacter valericigenes	Fruit ffq	0.121184	0.101569	0.234673	0.672267
Blautia faecis	Fruit ffq	0.094086	0.080017	0.241506	0.672267
GGB9758 SGB15368	Fruit ffq	0.17449	0.146407	0.235215	0.672267
Parabacteroides distasonis	Fruit ffq	-0.10834	0.09246	0.243121	0.672382
Clostridium fessum	Vegetables ffq	0.093715	0.078643	0.235191	0.6734
Phascolarctobacterium faecium	Wine ffq	-0.135	0.111491	0.227828	0.673413
Bacteroides eggerthii	Red meat ffq	-0.17595	0.142041	0.217341	0.674153
GGB33469 SGB15236	Butter ffq	-0.10936	0.085696	0.203852	0.675052
Acidaminococcus intestini	Fish ffq	0.111917	0.089756	0.214375	0.67606
Coprococcus comes	Fish ffq	0.099573	0.083224	0.233408	0.67606
Ruminococcus lactaris	Fish ffq	0.117742	0.096567	0.224624	0.67606
GGB3486 SGB4658	Fish ffq	-0.08212	0.068893	0.235094	0.67606
Paraprevotella clara	Fish ffq	-0.11487	0.093554	0.221384	0.67606
Oscillospiraceae bacterium	Beer ffq	-0.125	0.099642	0.211545	0.676181
Clostridium sp AM49 4BH	Beer ffq	-0.11915	0.094199	0.207821	0.676181
Roseburia intestinalis	Beer ffq	-0.14333	0.114193	0.211288	0.676181
Parabacteroides distasonis	Fish ffq	0.10403	0.087436	0.235992	0.676447
Bifidobacterium longum	Coffee ffq	0.128726	0.104775	0.221123	0.676507
Oscillibacter sp ER4	Butter ffq	-0.14202	0.112658	0.20939	0.676931
Blautia SGB4815	Yogurt ffq	-0.10985	0.087981	0.213743	0.678252
Clostridiaceae bacterium	Fish ffq	-0.09545	0.080509	0.237659	0.678477
Brotolimicola acetigignens	Wine ffq	0.158039	0.131753	0.232245	0.679982
Faecalibacterium prausnitzii	Pasta or rice ffq	0.110341	0.091296	0.228705	0.680349
Bacteroides finegoldii	Beer ffq	-0.10972	0.088442	0.216613	0.680674
Flavonifractor plautii	Cold cuts ffq	0.132964	0.10939	0.226085	0.68106
Phocaeicola dorei	Cheese ffq	-0.21299	0.172319	0.218353	0.681196
Parabacteroides merdae	Cheese ffq	-0.13887	0.111585	0.215205	0.681196
Oscillospiraceae bacterium	Cheese ffq	0.123882	0.100563	0.219913	0.681196
Clostridium sp AM49 4BH	Cheese ffq	-0.11583	0.094853	0.223954	0.681196
Agathobaculum butyriciproducens	Cheese ffq	-0.07921	0.063566	0.214636	0.681196
Odoribacter splanchnicus	Bread ffq	-0.08822	0.071013	0.216066	0.681303
GGB1420 SGB1957	Bread ffq	-0.10756	0.087094	0.218776	0.681303
Anaerobutyricum hallii	Bread ffq	0.112565	0.090013	0.213037	0.681303
Oscillibacter sp MSJ 31	Cold cuts ffq	0.131155	0.108838	0.230091	0.681736
Bifidobacterium pseudocatenulatum	Olive oil ffq	-0.11473	0.098006	0.243484	0.681917
Blautia faecis	Olive oil ffq	-0.09672	0.082972	0.245399	0.681917
Clostridiaceae bacterium	Pasta or rice ffq	-0.09724	0.081001	0.23183	0.681991
Blautia wexlerae	White meat ffq	0.091021	0.076902	0.238436	0.682979
Roseburia hominis	White meat ffq	-0.13453	0.113459	0.237651	0.682979
Bifidobacterium longum	Eggs ffq	-0.12722	0.102118	0.214719	0.683242
Bacteroides xylanisolvens	Fruit ffq	0.147129	0.127011	0.248538	0.683358
Gemmiger formicilis	Pasta or rice ffq	-0.1301	0.109493	0.236602	0.68373
Alistipes onderdonkii	Spirits ffq	-0.15939	0.131975	0.229038	0.684216
Oscillibacter sp ER4	Spirits ffq	0.132682	0.111815	0.237223	0.68528
Gemmiger formicilis	Spirits ffq	0.126553	0.105781	0.23339	0.68528
Odoribacter splanchnicus	Spirits ffq	0.081859	0.068896	0.236627	0.68528
Clostridium fessum	Spirits ffq	0.083481	0.072026	0.248269	0.68528
Clostridiaceae bacterium	Spirits ffq	0.093808	0.078395	0.233316	0.68528
Dysosmobacter welbionis	Spirits ffq	-0.08892	0.076378	0.24615	0.68528
GGB4552 SGB6276	Spirits ffq	0.099328	0.085611	0.24778	0.68528
Bifidobacterium adolescentis	Beer ffq	0.161387	0.131976	0.223242	0.685706
GGB9758 SGB15368	Wine ffq	-0.16674	0.140273	0.236442	0.686117
Ruminococcus lactaris	Eggs ffq	-0.11866	0.09639	0.220153	0.686644
Lachnospira eligens	Vegetables ffq	0.149702	0.131636	0.257192	0.686673
Faecalibacillus intestinalis	Vegetables ffq	-0.10567	0.092527	0.255164	0.686673
Ruminococcus lactaris	Vegetables ffq	-0.11543	0.102243	0.260586	0.686673
Roseburia intestinalis	Vegetables ffq	-0.14196	0.124828	0.257188	0.686673
Eubacterium ventriosum	Spirits ffq	0.083736	0.072505	0.249923	0.687167
Faecalibacillus intestinalis	White meat ffq	0.103051	0.088611	0.246703	0.687681
Ruminococcus bromii	White meat ffq	-0.18174	0.156108	0.24618	0.687681
GGB47687 SGB2286	Beer ffq	-0.11967	0.099174	0.229397	0.687908
Phocaeicola massiliensis	Vegetables ffq	-0.17214	0.154045	0.265444	0.688383
Bifidobacterium adolescentis	Fruit ffq	-0.16394	0.144068	0.256938	0.68895
Fusicatenibacter saccharivorans	Butter ffq	0.096575	0.080067	0.229639	0.688968
Parasutterella excrementihominis	Butter ffq	0.136188	0.112599	0.228356	0.688968
Bilophila wadsworthia	Butter ffq	0.109722	0.091441	0.232048	0.689427
Bacteroides finegoldii	Butter ffq	0.10631	0.089429	0.236394	0.689427
Barnesiella intestinihominis	Cheese ffq	0.136127	0.113513	0.232316	0.68958
Bacteroides clarus	Cheese ffq	-0.12043	0.100157	0.231062	0.68958
Bacteroides ovatus	Coffee ffq	-0.15954	0.133597	0.234254	0.689696
Bacteroides faecis	Coffee ffq	-0.14101	0.117641	0.232586	0.689696
GGB3175 SGB4191	Cheese ffq	0.122548	0.103042	0.236175	0.689717
Bacteroides uniformis	Eggs ffq	0.121597	0.100241	0.226946	0.690124
Oscillospiraceae bacterium CLA AA H250	Butter ffq	-0.10391	0.088315	0.241306	0.690908
Eubacterium siraeum	Beer ffq	0.132997	0.111814	0.236057	0.691665
Ruminococcus gnavus	Bread ffq	-0.11609	0.097431	0.235329	0.691917
GGB4571 SGB6317	Red meat ffq	0.121894	0.103845	0.242294	0.692067
Dorea longicatena	Whole milk ffq	0.118548	0.102937	0.251276	0.692231
Fusicatenibacter saccharivorans	Whole milk ffq	0.091843	0.081335	0.26057	0.692247
Streptococcus thermophilus	Whole milk ffq	-0.0997	0.087109	0.254199	0.692247
Oscillibacter sp MSJ 31	Whole milk ffq	0.121935	0.106735	0.255091	0.692247
GGB9602 SGB15031	Whole milk ffq	0.114599	0.10126	0.259551	0.692247
Fusicatenibacter saccharivorans	Cold cuts ffq	0.096606	0.082554	0.24375	0.692522
Blautia faecis	Cold cuts ffq	0.089099	0.076259	0.244493	0.692522
Roseburia faecis	Cold cuts ffq	0.1795	0.151427	0.237719	0.692522
Alistipes finegoldii	Yogurt ffq	0.146854	0.123277	0.235407	0.692876
Dialister invisus	Yogurt ffq	0.124089	0.103811	0.233807	0.692876
Alistipes finegoldii	Butter ffq	0.140677	0.120953	0.246633	0.693012
Bacteroides uniformis	Wine ffq	-0.11778	0.101824	0.249178	0.693499
Parasutterella SGB9260	Wine ffq	-0.10494	0.090633	0.24878	0.693499
Roseburia inulinivorans	Wine ffq	0.135154	0.115994	0.245787	0.693499
Lacrimispora amygdalina	Beer ffq	0.096932	0.083132	0.245407	0.693606
Anaerostipes hadrus	Cold cuts ffq	0.076134	0.065978	0.250345	0.693936
Alistipes shahii	Red meat ffq	0.120629	0.103657	0.246334	0.694578
Brotolimicola acetigignens	Butter ffq	-0.14565	0.126947	0.253122	0.694932
Clostridiaceae bacterium	Olive oil ffq	-0.10062	0.089539	0.262823	0.695045
Roseburia faecis	Whole milk ffq	0.165999	0.148807	0.266366	0.696632
GGB9699 SGB15216	Spirits ffq	0.093152	0.082122	0.258427	0.696961
Alistipes putredinis	Spirits ffq	0.192772	0.170933	0.261182	0.697549
GGB9342 SGB14306	Cheese ffq	0.12695	0.109112	0.246458	0.69797
Bacteroides xylanisolvens	Bread ffq	0.140643	0.120283	0.244159	0.698443
Eubacterium rectale	Spirits ffq	0.149163	0.135084	0.27123	0.699228
Faecalibacterium prausnitzii	Semi skimmed milk ffq	0.104886	0.0903	0.24724	0.700185
GGB9715 SGB15265	Bread ffq	0.120661	0.103461	0.245369	0.700488
GGB4552 SGB6276	Eggs ffq	-0.10149	0.088187	0.251613	0.701116
Blautia sp MCC283	Fish ffq	-0.14502	0.12652	0.253508	0.701758
Dialister invisus	Coffee ffq	0.12152	0.106423	0.255296	0.701941
Clostridium fessum	Yogurt ffq	-0.08493	0.074031	0.253117	0.702028
Anaerostipes hadrus	Yogurt ffq	0.074151	0.065309	0.258009	0.702028
Bifidobacterium pseudocatenulatum	Yogurt ffq	-0.10349	0.089243	0.24808	0.702028
Ruminococcus bicirculans	Beer ffq	-0.15671	0.137376	0.255761	0.702374
Faecalibacterium SGB15346	Beer ffq	0.121189	0.105612	0.252978	0.702374
Flavonifractor plautii	Beer ffq	-0.12143	0.105875	0.253171	0.702374
Blautia glucerasea	Fish ffq	0.103727	0.092205	0.262386	0.702756
GGB9699 SGB15216	White meat ffq	-0.09622	0.085846	0.264116	0.702985
GGB1420 SGB1957	Olive oil ffq	-0.10443	0.094481	0.27064	0.703319
Roseburia faecis	Coffee ffq	-0.17438	0.153713	0.2584	0.703375
Clostridium sp AF36 4	Cold cuts ffq	0.128275	0.11338	0.259688	0.70352
Clostridium sp AM22 11AC	Wine ffq	0.096921	0.08687	0.266308	0.703601
Streptococcus thermophilus	Wine ffq	-0.09898	0.088443	0.26492	0.703601
Bifidobacterium pseudocatenulatum	Cheese ffq	-0.09955	0.087961	0.259528	0.703916
Acidaminococcus intestini	Red meat ffq	0.101004	0.089645	0.261647	0.704359
Dialister invisus	Red meat ffq	-0.11744	0.104143	0.261185	0.704359
Bacteroides finegoldii	Fruit ffq	-0.10494	0.096686	0.279466	0.70509
Bifidobacterium bifidum	Vegetables ffq	-0.10155	0.094991	0.286679	0.705139
Anaerobutyricum soehngenii	Semi skimmed milk ffq	0.144017	0.128189	0.263007	0.705337
Blautia glucerasea	Pasta or rice ffq	-0.10572	0.092577	0.255276	0.706427
Dorea longicatena	Coffee ffq	0.119331	0.106444	0.264049	0.707411
Alistipes shahii	Olive oil ffq	-0.12213	0.111877	0.276546	0.707607
Bacteroides fragilis	Fruit ffq	-0.13668	0.127563	0.28565	0.708141
Dysosmobacter welbionis	Bread ffq	-0.08836	0.078647	0.262985	0.708803
GGB51647 SGB4348	Fruit ffq	0.158486	0.149213	0.289846	0.708847
GGB9758 SGB15368	Butter ffq	-0.14978	0.135643	0.271271	0.709754
Bacteroides stercoris	Fruit ffq	-0.18656	0.176602	0.292465	0.710797
Anaerobutyricum soehngenii	Fruit ffq	0.143549	0.13654	0.294796	0.711127
Clostridiaceae bacterium	Vegetables ffq	-0.09131	0.086092	0.290537	0.711642
Bifidobacterium longum	Olive oil ffq	0.121769	0.112288	0.279742	0.712437
Oscillospiraceae bacterium CLA AA H250	Whole milk ffq	0.095556	0.089507	0.287453	0.712722
Bilophila wadsworthia	Semi skimmed milk ffq	0.102664	0.092996	0.271323	0.712758
Dysosmobacter welbionis	Vegetables ffq	-0.08759	0.08372	0.297066	0.713665
GGB3486 SGB4658	Bread ffq	0.076665	0.068834	0.267156	0.71376
Akkermansia muciniphila	Eggs ffq	-0.13951	0.125685	0.268777	0.713891
GGB3486 SGB4658	Red meat ffq	-0.07708	0.069457	0.268804	0.714121
Bacteroides xylanisolvens	Red meat ffq	0.132722	0.120295	0.271626	0.714913
Faecalibacterium prausnitzii	Coffee ffq	-0.10236	0.093048	0.27306	0.716025
Eubacterium siraeum	Vegetables ffq	-0.127	0.122292	0.300638	0.716894
GGB9699 SGB15216	Eggs ffq	-0.09341	0.084624	0.27138	0.716928
Phocaeicola dorei	Butter ffq	0.187224	0.172407	0.279221	0.717237
Coprococcus catus	Butter ffq	-0.06432	0.059115	0.278284	0.717237
Akkermansia muciniphila	Olive oil ffq	-0.14771	0.13872	0.288592	0.718703
Eubacterium siraeum	Olive oil ffq	-0.13383	0.126779	0.292698	0.718703
GGB51647 SGB4348	Olive oil ffq	-0.16195	0.15368	0.293488	0.718811
GGB9715 SGB15265	Olive oil ffq	-0.11786	0.112222	0.295125	0.719105
Oscillospiraceae bacterium CLA AA H250	Pasta or rice ffq	0.099303	0.090882	0.276325	0.719415
Bacteroides fragilis	Pasta or rice ffq	-0.13267	0.121157	0.275232	0.719415
Parasutterella SGB9260	Fruit ffq	0.09784	0.094628	0.302824	0.720395
GGB4552 SGB6276	Pasta or rice ffq	0.096095	0.08852	0.279402	0.720564
Alistipes putredinis	Yogurt ffq	-0.19393	0.176159	0.272673	0.720656
Eubacterium ventriosum	Yogurt ffq	-0.08176	0.07432	0.273049	0.720656
Bacteroides eggerthii	Butter ffq	-0.1502	0.139778	0.28429	0.721424
Parabacteroides merdae	Pasta or rice ffq	-0.1224	0.114355	0.286153	0.721957
GGB9708 SGB15234	Pasta or rice ffq	-0.12069	0.113033	0.287321	0.721957
Faecalibacterium SGB15346	Butter ffq	-0.11385	0.106897	0.288587	0.722092
Alistipes ihumii	Red meat ffq	0.088677	0.081729	0.279614	0.722191
Lachnospira pectinoschiza	Beer ffq	0.119015	0.108978	0.276505	0.722383
GGB3345 SGB4425	Yogurt ffq	-0.09191	0.085354	0.283288	0.722865
Bacteroides xylanisolvens	Butter ffq	0.124614	0.117526	0.290719	0.723477
Lachnospira pectinoschiza	Yogurt ffq	0.119289	0.111407	0.286044	0.723788
Roseburia hominis	Fish ffq	-0.11943	0.111665	0.286562	0.723828
Alistipes finegoldii	Fish ffq	-0.13273	0.123751	0.285162	0.723828
Acidaminococcus intestini	Pasta or rice ffq	0.095304	0.090166	0.292213	0.723932
GGB47687 SGB2286	Pasta or rice ffq	0.108472	0.102781	0.292947	0.723932
Blautia glucerasea	Butter ffq	0.095162	0.090103	0.292598	0.724169
Bifidobacterium adolescentis	Butter ffq	0.139858	0.133407	0.296155	0.724617
Coprococcus eutactus	Butter ffq	0.159818	0.151847	0.294274	0.724617
Blautia faecis	White meat ffq	0.082299	0.077115	0.287573	0.725544
Eubacterium siraeum	White meat ffq	-0.12456	0.116885	0.288281	0.725544
Bacteroides clarus	White meat ffq	0.111031	0.104186	0.288252	0.725544
Lachnospira pectinoschiza	Butter ffq	0.113483	0.109283	0.300786	0.725575
Coprococcus eutactus	Vegetables ffq	0.166428	0.163291	0.309643	0.726575
Oscillibacter valericigenes	Cold cuts ffq	-0.10441	0.09681	0.282515	0.727347
Parabacteroides merdae	Spirits ffq	0.115178	0.110423	0.298561	0.728575
Alistipes putredinis	Wine ffq	0.191943	0.178742	0.284573	0.728985
Roseburia faecis	Olive oil ffq	0.16843	0.164567	0.307574	0.729521
Faecalibacterium SGB15346	Spirits ffq	0.109893	0.10593	0.301204	0.730115
Oscillospiraceae bacterium CLA AA H250	Spirits ffq	-0.09134	0.0879	0.30041	0.730115
Ruminococcus lactaris	Spirits ffq	-0.09731	0.093775	0.301036	0.730115
Bacteroides uniformis	Red meat ffq	0.106233	0.100598	0.292598	0.730599
GGB4552 SGB6276	Yogurt ffq	-0.09243	0.087799	0.29417	0.730779
Phascolarctobacterium faecium	Eggs ffq	0.118181	0.109676	0.282902	0.730985
Lachnospira pectinoschiza	Spirits ffq	0.112577	0.108864	0.302747	0.731201
Alistipes putredinis	Beer ffq	0.183257	0.170467	0.284043	0.731282
Faecalibacterium prausnitzii	Vegetables ffq	-0.09646	0.096101	0.317013	0.731405
Coprococcus comes	Vegetables ffq	-0.08833	0.088019	0.317149	0.731405
Anaerobutyricum hallii	Spirits ffq	0.089691	0.087405	0.306429	0.731769
GGB3175 SGB4191	Spirits ffq	-0.10494	0.102089	0.305614	0.731769
Clostridium sp AM22 11AC	Bread ffq	-0.09121	0.085835	0.289664	0.731987
Faecalibacillus intestinalis	Bread ffq	0.09281	0.087221	0.289019	0.731987
Akkermansia muciniphila	Bread ffq	0.133512	0.125719	0.290003	0.731987
Oscillospiraceae bacterium	Wine ffq	-0.11016	0.103918	0.290829	0.732539
Bacteroides cellulosilyticus	Yogurt ffq	0.132467	0.127115	0.299025	0.73272
Blautia glucerasea	Yogurt ffq	-0.09573	0.091978	0.299608	0.73272
Streptococcus thermophilus	Vegetables ffq	0.093624	0.094007	0.320879	0.733305
Bacteroides xylanisolvens	White meat ffq	0.127853	0.122285	0.297465	0.733817
Roseburia faecis	Red meat ffq	0.155995	0.150606	0.301919	0.735304
GGB3345 SGB4425	Red meat ffq	-0.0886	0.08568	0.302742	0.735304
Wujia chipingensis	Eggs ffq	-0.08918	0.083975	0.289966	0.735612
Coprococcus eutactus	White meat ffq	-0.16273	0.158055	0.304864	0.736669
Alistipes finegoldii	Fruit ffq	0.131537	0.130871	0.316445	0.736984
Eubacterium ventriosum	Fruit ffq	0.079211	0.078946	0.317289	0.73721
Brotolimicola acetigignens	White meat ffq	0.135875	0.132429	0.306563	0.737394
Eubacterium ventriosum	Vegetables ffq	-0.07849	0.079659	0.325972	0.737789
Bifidobacterium adolescentis	Vegetables ffq	-0.1402	0.143764	0.330941	0.737869
Simiaoa sunii	Vegetables ffq	-0.14374	0.147781	0.332258	0.737869
Blautia obeum	Cold cuts ffq	0.111713	0.106465	0.295725	0.738029
Phascolarctobacterium faecium	Whole milk ffq	0.109937	0.108919	0.314392	0.738308
Bacteroides caccae	Cold cuts ffq	0.112236	0.107449	0.297894	0.738736
Streptococcus salivarius	Semi skimmed milk ffq	0.111165	0.105454	0.293451	0.738849
Bacteroides ovatus	Whole milk ffq	0.129974	0.129335	0.316501	0.739546
GGB9699 SGB15216	Fruit ffq	0.088867	0.089303	0.321266	0.739695
Lacrimispora amygdalina	Coffee ffq	-0.09031	0.087021	0.301072	0.74042
Bilophila wadsworthia	Coffee ffq	-0.09916	0.09574	0.30197	0.74042
Candidatus Cibionibacter quicibialis	Fish ffq	-0.11994	0.115384	0.300236	0.74086
Streptococcus salivarius	Fish ffq	-0.11014	0.105678	0.298966	0.74086
Bacteroides fragilis	Coffee ffq	0.127236	0.123352	0.303954	0.740993
Bacteroides faecis	Cold cuts ffq	-0.12005	0.116044	0.30259	0.741293
Bacteroides cellulosilyticus	Cheese ffq	0.130659	0.125017	0.297621	0.741956
Phocaeicola dorei	Pasta or rice ffq	0.180885	0.176688	0.307565	0.742118
Bifidobacterium adolescentis	Pasta or rice ffq	0.139817	0.136936	0.308854	0.742118
Bacteroides faecis	Red meat ffq	0.117237	0.114905	0.309249	0.743457
Akkermansia muciniphila	Cold cuts ffq	-0.12927	0.126584	0.308824	0.744375
Lawsonibacter asaccharolyticus	Eggs ffq	0.086229	0.083227	0.301819	0.745857
Roseburia intestinalis	Red meat ffq	-0.11965	0.117754	0.311175	0.746001
GGB4571 SGB6317	Spirits ffq	0.100445	0.100853	0.320848	0.746011
Phocaeicola vulgatus	Coffee ffq	-0.1763	0.172253	0.307688	0.747318
Faecalicatena fissicatena	Beer ffq	0.094222	0.091735	0.305954	0.7475
Wujia chipingensis	Beer ffq	-0.08359	0.081778	0.308342	0.747625
Streptococcus thermophilus	White meat ffq	0.089203	0.088613	0.31579	0.747756
Ruminococcus gnavus	Whole milk ffq	0.095205	0.096722	0.326511	0.748121
Clostridium sp AF36 4	Cheese ffq	-0.11433	0.110478	0.302354	0.748485
GGB6606 SGB9340	Fruit ffq	0.090185	0.092351	0.330322	0.748759
Streptococcus salivarius	Whole milk ffq	0.102607	0.104851	0.329318	0.749701
Simiaoa sunii	Olive oil ffq	-0.15029	0.153055	0.327635	0.7498
Bacteroides cellulosilyticus	Whole milk ffq	-0.12271	0.126172	0.332303	0.750464
GGB3304 SGB4367	Eggs ffq	-0.11216	0.110045	0.309699	0.751517
Bacteroides thetaiotaomicron	White meat ffq	0.133328	0.133683	0.320213	0.751943
Agathobaculum butyriciproducens	White meat ffq	-0.06511	0.065863	0.324499	0.753262
Blautia sp MCC283	Eggs ffq	0.127418	0.126142	0.314011	0.754033
Eubacterium ventriosum	Coffee ffq	-0.07686	0.076374	0.315853	0.754211
Alistipes ihumii	Yogurt ffq	0.081689	0.081287	0.316541	0.754584
Clostridium fessum	Red meat ffq	-0.07299	0.074401	0.328127	0.7554
Anaerobutyricum hallii	Yogurt ffq	-0.08894	0.089842	0.323764	0.755476
Mediterraneibacter faecis	Yogurt ffq	0.096739	0.097331	0.321832	0.755476
Bacteroides caccae	Olive oil ffq	-0.11261	0.115754	0.332053	0.756073
Clostridium sp AF36 4	Coffee ffq	0.115244	0.115181	0.318637	0.756354
GGB51647 SGB4348	Coffee ffq	-0.1446	0.144364	0.318117	0.756354
Alistipes communis	Olive oil ffq	0.098533	0.101606	0.333581	0.756973
Acidaminococcus intestini	Olive oil ffq	-0.09356	0.096638	0.334362	0.75753
Parabacteroides merdae	Olive oil ffq	-0.11688	0.121297	0.336601	0.757557
Odoribacter splanchnicus	Olive oil ffq	-0.07538	0.07795	0.334948	0.757557
Faecalibacterium SGB15346	Whole milk ffq	0.102843	0.107888	0.341992	0.758125
Blautia massiliensis	Whole milk ffq	0.102138	0.107278	0.342552	0.758125
Clostridium sp AF36 4	Fish ffq	-0.11379	0.112707	0.3143	0.758176
Bacteroides faecis	Beer ffq	-0.11138	0.111333	0.318714	0.758768
Blautia massiliensis	Coffee ffq	-0.11028	0.110824	0.321274	0.759473
Alistipes ihumii	White meat ffq	0.08002	0.082934	0.336174	0.760078
Bacteroides ovatus	Bread ffq	0.131683	0.131139	0.316907	0.760576
Lacrimispora amygdalina	Spirits ffq	0.080564	0.082861	0.332474	0.761786
Faecalicatena fissicatena	Butter ffq	0.088914	0.09242	0.337564	0.762885
Flavonifractor plautii	Butter ffq	0.102531	0.106305	0.336356	0.762885
GGB3345 SGB4425	Butter ffq	-0.08111	0.083805	0.334697	0.762885
Bacteroides stercoris	Butter ffq	-0.15607	0.163946	0.34264	0.763391
GGB51647 SGB4348	Whole milk ffq	-0.12908	0.139812	0.357321	0.763625
Faecalibacterium sp HTFF	Bread ffq	0.098188	0.098943	0.322588	0.76379
Bacteroides uniformis	Vegetables ffq	0.098173	0.106334	0.357261	0.764172
Faecalibacterium sp HTFF	Wine ffq	-0.10046	0.100014	0.316729	0.764339
Phascolarctobacterium faecium	White meat ffq	0.106711	0.112234	0.343224	0.764469
Blautia glucerasea	Red meat ffq	-0.08857	0.092402	0.339318	0.765094
Coprococcus catus	Beer ffq	0.05773	0.058891	0.328455	0.766214
Bacteroides stercoris	Eggs ffq	0.163426	0.16496	0.323373	0.766218
Bifidobacterium adolescentis	Eggs ffq	-0.13387	0.136011	0.326519	0.766218
Odoribacter splanchnicus	Eggs ffq	0.069705	0.070942	0.327379	0.766218
Dysosmobacter welbionis	Eggs ffq	0.077004	0.078771	0.329808	0.766218
Lawsonibacter asaccharolyticus	Pasta or rice ffq	0.080757	0.083687	0.336099	0.766371
Faecalibacterium prausnitzii	Olive oil ffq	0.093519	0.098648	0.344511	0.767024
Blautia massiliensis	Olive oil ffq	-0.11038	0.117388	0.348417	0.767368
GGB4571 SGB6317	Olive oil ffq	0.105633	0.112983	0.351168	0.767368
GGB3304 SGB4367	Vegetables ffq	-0.10668	0.116476	0.361115	0.767777
GGB4552 SGB6276	Butter ffq	-0.08143	0.086169	0.346199	0.768367
GGB51647 SGB4348	Spirits ffq	0.131537	0.13703	0.338604	0.768371
Parasutterella excrementihominis	Wine ffq	0.113525	0.116748	0.33239	0.769058
Anaerobutyricum soehngenii	White meat ffq	-0.12372	0.131472	0.348203	0.769368
GGB3175 SGB4191	White meat ffq	-0.10078	0.107115	0.34828	0.769368
Phascolarctobacterium faecium	Vegetables ffq	-0.1048	0.115417	0.365239	0.770333
Bacteroides clarus	Vegetables ffq	0.096601	0.106799	0.367065	0.770333
Faecalibacterium SGB15346	Semi skimmed milk ffq	-0.10666	0.108317	0.326331	0.771594
Ruminococcus bromii	Semi skimmed milk ffq	0.149156	0.152222	0.328704	0.771881
Blautia faecis	Vegetables ffq	-0.07206	0.080389	0.371393	0.772076
Parasutterella excrementihominis	Vegetables ffq	-0.10824	0.121261	0.373386	0.772076
Clostridium fessum	Whole milk ffq	0.066003	0.073622	0.371405	0.772257
Bilophila wadsworthia	Whole milk ffq	-0.08265	0.092775	0.3744	0.772257
Coprococcus eutactus	Whole milk ffq	0.134763	0.153607	0.381697	0.772257
Ruminococcus lactaris	White meat ffq	-0.09194	0.098414	0.351677	0.773599
Eubacterium ventriosum	Pasta or rice ffq	-0.07114	0.075038	0.344582	0.775534
Eubacterium ventriosum	Semi skimmed milk ffq	0.072237	0.07439	0.333038	0.776616
Dorea longicatena	Cold cuts ffq	-0.10117	0.105062	0.337134	0.778762
Gemmiger formicilis	Eggs ffq	-0.10324	0.108893	0.344537	0.77949
Blautia obeum	Eggs ffq	-0.09979	0.105504	0.345706	0.77949
Oscillibacter sp ER4	Beer ffq	-0.1067	0.111907	0.341822	0.78031
Bifidobacterium pseudocatenulatum	Pasta or rice ffq	-0.08341	0.090105	0.35609	0.780532
GGB9635 SGB15106	Pasta or rice ffq	0.11048	0.118517	0.352742	0.780532
Bacteroides caccae	Coffee ffq	0.101593	0.108969	0.352655	0.78187
GGB47687 SGB2286	Fruit ffq	0.099161	0.108389	0.361731	0.782003
Bacteroides fragilis	Whole milk ffq	-0.10144	0.11964	0.397832	0.782029
Roseburia inulinivorans	Olive oil ffq	0.115401	0.127351	0.366215	0.782142
Phocaeicola dorei	Semi skimmed milk ffq	0.16662	0.174428	0.340958	0.782142
Brotolimicola acetigignens	Whole milk ffq	0.108402	0.129028	0.402168	0.782239
Flavonifractor plautii	Whole milk ffq	-0.09093	0.10795	0.400934	0.782239
GGB3304 SGB4367	Butter ffq	0.099037	0.107957	0.360434	0.78239
Bacteroides stercoris	Bread ffq	-0.15852	0.167691	0.345996	0.78255
Flavonifractor plautii	Eggs ffq	0.102378	0.108869	0.348504	0.783718
Bacteroides ovatus	Cold cuts ffq	0.124833	0.132004	0.345818	0.783876
Anaerostipes hadrus	Semi skimmed milk ffq	0.061981	0.06533	0.344228	0.784195
Brotolimicola acetigignens	Olive oil ffq	0.127777	0.143252	0.373749	0.784556
Bacteroides faecis	Olive oil ffq	-0.10971	0.12341	0.375282	0.784556
Alistipes communis	Red meat ffq	0.084087	0.092999	0.367305	0.785139
Oscillibacter sp MSJ 31	Butter ffq	-0.0953	0.105863	0.369453	0.785459
Paraprevotella clara	Butter ffq	-0.08209	0.091655	0.371846	0.785459
Fusicatenibacter saccharivorans	Yogurt ffq	0.077667	0.081817	0.343995	0.785538
Bacteroides ovatus	Yogurt ffq	0.123855	0.130614	0.344506	0.785538
Mediterraneibacter faecis	White meat ffq	0.089831	0.099455	0.367826	0.785584
Bilophila wadsworthia	Eggs ffq	0.086901	0.093631	0.354786	0.78576
GGB9715 SGB15265	Whole milk ffq	0.084953	0.102405	0.408071	0.786162
GGB9699 SGB15216	Butter ffq	0.073729	0.082559	0.373262	0.786517
Streptococcus salivarius	Vegetables ffq	-0.09808	0.113025	0.386859	0.787057
Lacrimispora amygdalina	Vegetables ffq	0.078153	0.09091	0.391327	0.787356
Bacteroides cellulosilyticus	Vegetables ffq	0.115228	0.134281	0.392114	0.787356
Brotolimicola acetigignens	Yogurt ffq	0.121373	0.129671	0.350808	0.788441
Clostridium sp AM22 11AC	Olive oil ffq	0.082449	0.094111	0.382257	0.788553
Lachnospira sp NSJ 43	Cold cuts ffq	0.079582	0.086051	0.356564	0.788898
Brotolimicola acetigignens	Vegetables ffq	0.117039	0.13827	0.398614	0.788941
Gemmiger formicilis	Vegetables ffq	0.096655	0.115053	0.402096	0.788941
Parasutterella SGB9260	White meat ffq	-0.08097	0.091173	0.375924	0.789637
Oscillibacter valericigenes	Cheese ffq	0.089758	0.094401	0.343194	0.790242
Anaerostipes hadrus	Vegetables ffq	-0.05781	0.069858	0.40914	0.790382
Bacteroides uniformis	Coffee ffq	0.092593	0.102864	0.369455	0.791457
Ruminococcus gnavus	Coffee ffq	-0.08973	0.099814	0.370104	0.791457
GGB3486 SGB4658	Coffee ffq	0.063268	0.070523	0.371068	0.791457
Blautia wexlerae	Cold cuts ffq	0.069321	0.076257	0.364777	0.792214
Bacteroides faecis	Spirits ffq	-0.1009	0.111574	0.367283	0.792793
Blautia obeum	Coffee ffq	0.094258	0.108144	0.384813	0.793151
Parabacteroides merdae	Eggs ffq	0.102162	0.113176	0.368082	0.793309
Clostridium sp AM22 11AC	Eggs ffq	0.07845	0.085774	0.361818	0.793309
Bacteroides faecis	White meat ffq	0.099519	0.117453	0.398203	0.794996
Alistipes shahii	White meat ffq	0.088646	0.105881	0.40378	0.795206
Faecalibacterium prausnitzii	White meat ffq	0.077487	0.092792	0.405011	0.795577
Clostridiaceae bacterium	Whole milk ffq	0.064121	0.080068	0.424487	0.795969
Ruminococcus SGB4421	Eggs ffq	0.08984	0.100716	0.37376	0.796555
GGB47687 SGB2286	Eggs ffq	-0.09078	0.102286	0.376195	0.796555
GGB4552 SGB6276	Fruit ffq	-0.08246	0.093292	0.378174	0.796866
GGB9602 SGB15031	Butter ffq	0.087465	0.100074	0.383536	0.79691
Acidaminococcus intestini	Wine ffq	0.084128	0.091031	0.356876	0.797061
Ruminococcus SGB4421	Red meat ffq	-0.08674	0.101	0.391803	0.797117
Agathobaculum butyriciproducens	Beer ffq	0.055613	0.063482	0.382336	0.797156
Parasutterella excrementihominis	Beer ffq	-0.09725	0.111692	0.385286	0.797156
Faecalibacterium SGB15346	Eggs ffq	0.096304	0.108764	0.377312	0.797423
Collinsella aerofaciens	Whole milk ffq	0.073872	0.094247	0.434387	0.797784
GGB3345 SGB4425	Whole milk ffq	0.066548	0.084856	0.434103	0.797784
Roseburia intestinalis	White meat ffq	-0.09909	0.119406	0.407947	0.797862
Blautia SGB4815	Pasta or rice ffq	-0.07809	0.088889	0.381031	0.798464
Oscillibacter sp ER4	Fish ffq	0.107537	0.11554	0.353477	0.799453
Collinsella aerofaciens	Fish ffq	0.087867	0.095173	0.357386	0.799453
Blautia obeum	Vegetables ffq	-0.09005	0.111827	0.421847	0.799646
Ruminococcus bromii	Butter ffq	0.130311	0.150321	0.387386	0.799821
Ruminococcus SGB4421	Butter ffq	-0.08577	0.098894	0.387161	0.799821
Alistipes shahii	Cold cuts ffq	-0.09173	0.104771	0.382653	0.799854
Faecalibacillus intestinalis	Cold cuts ffq	0.077876	0.087858	0.376834	0.799854
Bifidobacterium adolescentis	White meat ffq	-0.1142	0.139091	0.412917	0.799868
Roseburia inulinivorans	White meat ffq	0.094963	0.116706	0.417106	0.799868
GGB9758 SGB15368	White meat ffq	-0.11428	0.141399	0.42027	0.799868
Eubacterium rectale	Fruit ffq	-0.1296	0.147428	0.380746	0.799906
Paraprevotella clara	Yogurt ffq	-0.08246	0.093442	0.37893	0.800447
Mediterraneibacter faecis	Coffee ffq	-0.08486	0.099882	0.396862	0.800507
Odoribacter splanchnicus	Fruit ffq	-0.06566	0.075219	0.384132	0.800776
Blautia sp MCC283	Pasta or rice ffq	-0.111	0.127132	0.383967	0.801617
Phocaeicola dorei	Wine ffq	-0.16299	0.178277	0.362007	0.80163
Clostridium sp AM49 4BH	Fruit ffq	0.086451	0.102496	0.400343	0.801681
Ruminococcus callidus	Bread ffq	0.081382	0.090694	0.370958	0.801755
Dorea formicigenerans	Bread ffq	-0.05782	0.063872	0.366771	0.801755
Bacteroides fragilis	Bread ffq	-0.10913	0.120749	0.367545	0.801755
GGB47687 SGB2286	White meat ffq	0.083825	0.104418	0.423377	0.801863
Dorea longicatena	Wine ffq	0.095517	0.105547	0.36693	0.802157
Gemmiger formicilis	Cold cuts ffq	0.095416	0.110186	0.387875	0.802234
Ruminococcus callidus	Olive oil ffq	0.082468	0.098309	0.402731	0.80336
Blautia obeum	Olive oil ffq	-0.09739	0.115332	0.399655	0.80336
Blautia glucerasea	Olive oil ffq	-0.08532	0.101352	0.401105	0.80336
GGB4552 SGB6276	Vegetables ffq	-0.07381	0.093979	0.433443	0.803554
GGB51647 SGB4348	Cold cuts ffq	-0.12204	0.142409	0.392795	0.80432
GGB3304 SGB4367	Pasta or rice ffq	0.094184	0.110803	0.39667	0.804705
Coprococcus catus	White meat ffq	-0.04857	0.061708	0.432504	0.804764
Coprococcus catus	Bread ffq	-0.05394	0.060622	0.375025	0.804926
Alistipes putredinis	Pasta or rice ffq	-0.1481	0.177465	0.405277	0.805045
Alistipes onderdonkii	Pasta or rice ffq	-0.11247	0.137001	0.412949	0.805045
Eubacterium rectale	Pasta or rice ffq	-0.11269	0.140026	0.422215	0.805045
Clostridium fessum	Pasta or rice ffq	0.060665	0.074721	0.418139	0.805045
Dorea longicatena	Pasta or rice ffq	0.088507	0.104637	0.398984	0.805045
Roseburia intestinalis	Eggs ffq	-0.10123	0.117518	0.390359	0.805755
Wujia chipingensis	Pasta or rice ffq	-0.06742	0.084363	0.425451	0.806478
Bacteroides thetaiotaomicron	Fish ffq	0.118442	0.131352	0.368662	0.80684
Bifidobacterium adolescentis	Red meat ffq	-0.11292	0.13655	0.40953	0.807376
Flavonifractor plautii	Red meat ffq	0.090479	0.10925	0.408845	0.807376
Alistipes finegoldii	Red meat ffq	-0.10218	0.123827	0.41053	0.807376
Lachnospira pectinoschiza	Cold cuts ffq	-0.0947	0.112781	0.402429	0.807482
Phascolarctobacterium faecium	Cold cuts ffq	0.093215	0.111146	0.402971	0.807482
Faecalibacterium sp HTFF	Cold cuts ffq	-0.08412	0.09961	0.399696	0.807482
Ruminococcus lactaris	Yogurt ffq	0.082561	0.096451	0.393349	0.80749
GGB4552 SGB6276	Olive oil ffq	-0.08044	0.097517	0.410643	0.807597
Bacteroides ovatus	Red meat ffq	0.107058	0.130934	0.414825	0.808937
Flavonifractor plautii	Fish ffq	-0.09741	0.108923	0.372599	0.809092
Phascolarctobacterium faecium	Olive oil ffq	0.095659	0.118853	0.422033	0.809754
Blautia massiliensis	Semi skimmed milk ffq	0.094952	0.107656	0.379162	0.809793
Odoribacter splanchnicus	Beer ffq	0.057343	0.069067	0.407677	0.810186
Eubacterium ventriosum	Beer ffq	0.060224	0.072978	0.410483	0.810186
Lachnospira sp NSJ 43	Beer ffq	0.070059	0.083065	0.400306	0.810186
Clostridium sp AM22 11AC	Coffee ffq	0.072959	0.087752	0.407044	0.810207
GGB4571 SGB6317	Yogurt ffq	-0.08834	0.103787	0.396022	0.811169
Bifidobacterium longum	Whole milk ffq	0.07633	0.101752	0.454308	0.811699
Roseburia intestinalis	Cheese ffq	-0.10481	0.115255	0.364601	0.811753
Sutterella wadsworthensis	Butter ffq	0.106078	0.126293	0.402262	0.811762
Bacteroides clarus	Pasta or rice ffq	0.080526	0.102798	0.434644	0.811948
Dysosmobacter welbionis	Butter ffq	0.063651	0.076921	0.409267	0.812223
Bacteroides uniformis	Semi skimmed milk ffq	0.08722	0.099961	0.384264	0.812302
Bifidobacterium adolescentis	Whole milk ffq	0.098231	0.135145	0.468419	0.812552
Bacteroides uniformis	Whole milk ffq	0.071974	0.099679	0.471347	0.812552
GGB33469 SGB15236	Whole milk ffq	-0.06409	0.087004	0.462443	0.812552
Bifidobacterium adolescentis	Spirits ffq	0.109451	0.132451	0.40989	0.812579
Bifidobacterium longum	Spirits ffq	0.08171	0.099659	0.413547	0.812579
Blautia SGB4815	White meat ffq	-0.0681	0.090159	0.45124	0.812921
Bacteroides fragilis	White meat ffq	0.092891	0.122982	0.451229	0.812921
GGB3486 SGB4658	Whole milk ffq	-0.04905	0.068584	0.475525	0.813217
Coprococcus catus	Pasta or rice ffq	-0.04652	0.060903	0.446123	0.814359
Ruminococcus SGB4421	Pasta or rice ffq	0.077371	0.101482	0.446996	0.814359
GGB3486 SGB4658	Pasta or rice ffq	0.053848	0.06949	0.439571	0.814359
Gemmiger formicilis	Fish ffq	-0.09539	0.109344	0.384378	0.814368
GGB3175 SGB4191	Fish ffq	0.091637	0.10538	0.385905	0.814368
Phocaeicola massiliensis	Fruit ffq	-0.12736	0.1589	0.424071	0.814768
Bacteroides caccae	Whole milk ffq	0.074082	0.105567	0.483897	0.815361
Oscillospiraceae bacterium CLA AA H250	Yogurt ffq	-0.07541	0.09026	0.404848	0.815446
Wujia chipingensis	Yogurt ffq	0.069482	0.083678	0.407694	0.815489
Candidatus Cibionibacter quicibialis	Bread ffq	0.098961	0.115643	0.393492	0.815565
Akkermansia muciniphila	Semi skimmed milk ffq	0.105919	0.12531	0.39931	0.815729
Bacteroides clarus	Olive oil ffq	0.086956	0.109345	0.427586	0.815986
Akkermansia muciniphila	Red meat ffq	-0.1011	0.126351	0.424897	0.816307
Flavonifractor plautii	Semi skimmed milk ffq	0.090045	0.108418	0.407523	0.816418
Wujia chipingensis	Semi skimmed milk ffq	0.069679	0.083609	0.405952	0.816418
Lachnospira eligens	Eggs ffq	-0.10287	0.124515	0.41001	0.81656
Lachnospira sp NSJ 43	Eggs ffq	-0.06986	0.085424	0.414723	0.816757
Lacrimispora amygdalina	Fish ffq	0.07145	0.085126	0.402642	0.817222
Clostridiales bacterium KLE1615	Fish ffq	0.068592	0.07979	0.391326	0.817222
Roseburia inulinivorans	Fish ffq	-0.09578	0.114694	0.404985	0.817222
Ruminococcus SGB4421	Olive oil ffq	0.085279	0.109455	0.437001	0.81725
GGB3486 SGB4658	Olive oil ffq	0.059891	0.076904	0.437246	0.81725
Bifidobacterium longum	White meat ffq	0.077131	0.104591	0.461987	0.817335
Brotolimicola acetigignens	Cheese ffq	-0.11156	0.12789	0.384432	0.817519
Oscillibacter sp ER4	Cheese ffq	-0.09818	0.113322	0.387665	0.817519
Parabacteroides distasonis	Cheese ffq	0.073941	0.08593	0.390876	0.817519
Paraprevotella clara	Cheese ffq	-0.07946	0.091904	0.388589	0.817519
Roseburia faecis	Beer ffq	-0.11833	0.146172	0.419428	0.818058
Alistipes ihumii	Semi skimmed milk ffq	0.066724	0.081238	0.412735	0.818534
Clostridium fessum	Olive oil ffq	0.062506	0.08151	0.444281	0.820212
GGB9715 SGB15265	Coffee ffq	-0.08458	0.105907	0.425772	0.820338
Eubacterium rectale	Butter ffq	-0.10869	0.136402	0.426801	0.820798
Alistipes shahii	Butter ffq	-0.08072	0.101783	0.42897	0.820798
GGB3175 SGB4191	Butter ffq	0.081399	0.102997	0.430592	0.820798
Streptococcus salivarius	Bread ffq	-0.08757	0.105587	0.408219	0.820831
Lachnospira pectinoschiza	Eggs ffq	0.090081	0.112181	0.423247	0.820983
Bacteroides faecis	Yogurt ffq	-0.09193	0.115066	0.4256	0.821049
Faecalicatena fissicatena	White meat ffq	-0.06886	0.096382	0.476079	0.821105
Blautia faecis	Cheese ffq	-0.0628	0.074412	0.399991	0.822157
Clostridiales bacterium KLE1615	Cheese ffq	-0.06611	0.078337	0.400047	0.822157
Roseburia faecis	Bread ffq	0.120263	0.150813	0.426453	0.822792
Clostridiales bacterium KLE1615	Bread ffq	0.063543	0.079761	0.426902	0.822792
Akkermansia muciniphila	Spirits ffq	-0.09656	0.122481	0.431703	0.823843
Ruminococcus gnavus	Eggs ffq	-0.07787	0.097751	0.426873	0.824071
Bacteroides clarus	Eggs ffq	-0.08131	0.1018	0.425649	0.824071
Faecalibacterium SGB15346	Wine ffq	0.088135	0.110887	0.427975	0.824459
GGB33469 SGB15236	Wine ffq	0.071513	0.089082	0.423342	0.824459
Candidatus Cibionibacter quicibialis	Wine ffq	-0.09399	0.117006	0.423066	0.824459
Streptococcus salivarius	Wine ffq	-0.08974	0.107054	0.403223	0.824459
Bacteroides eggerthii	Wine ffq	-0.11981	0.144566	0.408533	0.824459
GGB9342 SGB14306	Wine ffq	-0.09014	0.112915	0.425941	0.824459
Alistipes communis	Beer ffq	0.071647	0.09027	0.428568	0.824502
Roseburia inulinivorans	Yogurt ffq	-0.09033	0.114228	0.430347	0.824589
Bacteroides uniformis	Spirits ffq	-0.07629	0.097709	0.436132	0.825614
Parabacteroides distasonis	Coffee ffq	0.068863	0.089609	0.443389	0.825691
Blautia faecis	Coffee ffq	-0.0596	0.077603	0.443674	0.825691
GGB4552 SGB6276	Coffee ffq	0.06948	0.090298	0.442841	0.825691
Bacteroides finegoldii	Bread ffq	-0.07267	0.0918	0.429842	0.825822
Simiaoa sunii	Beer ffq	0.106683	0.135381	0.431926	0.826497
Eubacterium rectale	Coffee ffq	-0.10709	0.142657	0.454013	0.827391
Parasutterella SGB9260	Yogurt ffq	0.06943	0.089389	0.438549	0.827491
GGB3175 SGB4191	Yogurt ffq	-0.08112	0.10505	0.441212	0.827491
Eubacterium siraeum	Wine ffq	0.091866	0.116647	0.43219	0.828121
Faecalibacterium prausnitzii	Fish ffq	0.073843	0.091224	0.419528	0.828525
Alistipes onderdonkii	Fruit ffq	0.112561	0.144345	0.43672	0.828554
Bacteroides clarus	Fruit ffq	0.084383	0.108301	0.437097	0.828554
Faecalicatena fissicatena	Red meat ffq	-0.07324	0.094743	0.440666	0.828955
Lachnospira eligens	Red meat ffq	-0.09542	0.124851	0.445925	0.82933
Gemmiger formicilis	Beer ffq	0.082651	0.105914	0.436361	0.829385
GGB3486 SGB4658	Spirits ffq	0.051385	0.067305	0.446337	0.829703
Bacteroides cellulosilyticus	White meat ffq	0.089133	0.130063	0.494201	0.82999
Alistipes putredinis	Olive oil ffq	-0.13788	0.186457	0.460625	0.830877
Oscillospiraceae bacterium	Vegetables ffq	-0.07997	0.109274	0.465385	0.830921
Blautia SGB4815	Vegetables ffq	-0.06725	0.093546	0.473287	0.830921
GGB3175 SGB4191	Fruit ffq	0.085804	0.111399	0.442357	0.830965
Ruminococcus gnavus	Cheese ffq	-0.07873	0.095895	0.412956	0.831003
Agathobaculum butyriciproducens	Pasta or rice ffq	0.046743	0.065267	0.474982	0.831365
Eubacterium ventriosum	Butter ffq	0.053599	0.072958	0.4637	0.831508
Clostridiales bacterium KLE1615	Butter ffq	0.057122	0.077894	0.464493	0.831508
Blautia wexlerae	Butter ffq	0.053069	0.074097	0.474975	0.831567
Roseburia hominis	Butter ffq	0.078388	0.109123	0.473682	0.831567
Bacteroides stercoris	Vegetables ffq	-0.12082	0.171743	0.482764	0.831622
Roseburia hominis	Beer ffq	0.082344	0.109509	0.453213	0.831665
Akkermansia muciniphila	Beer ffq	-0.09248	0.122729	0.452271	0.831665
Bifidobacterium adolescentis	Bread ffq	0.105719	0.136845	0.441001	0.831733
Faecalibacterium SGB15346	Bread ffq	0.084542	0.109574	0.441602	0.831733
GGB51647 SGB4348	Yogurt ffq	0.107349	0.141004	0.447644	0.832208
Dysosmobacter welbionis	Fish ffq	-0.06265	0.078829	0.42802	0.832522
Oscillibacter sp MSJ 31	Cheese ffq	0.08587	0.106142	0.419787	0.833275
GGB3345 SGB4425	Beer ffq	0.060969	0.083194	0.464755	0.833921
Bacteroides xylanisolvens	Spirits ffq	0.085889	0.116939	0.463786	0.83425
Roseburia inulinivorans	Spirits ffq	0.080506	0.111836	0.472701	0.83425
Faecalicatena fissicatena	Eggs ffq	-0.07165	0.094507	0.449547	0.834344
Bifidobacterium bifidum	Yogurt ffq	-0.06719	0.090022	0.456622	0.834638
Blautia wexlerae	Olive oil ffq	-0.06076	0.082914	0.464698	0.835042
Lachnospira pectinoschiza	Coffee ffq	-0.08206	0.114663	0.47532	0.835054
Bacteroides uniformis	Fish ffq	0.078673	0.10078	0.436219	0.83508
Barnesiella intestinihominis	Fish ffq	0.091747	0.116236	0.431163	0.83508
Oscillospiraceae bacterium CLA AA H250	Fish ffq	0.070954	0.090692	0.435266	0.83508
Clostridiales bacterium KLE1615	Spirits ffq	-0.0554	0.077644	0.476563	0.835164
Alistipes finegoldii	Eggs ffq	-0.09176	0.123519	0.458659	0.835284
Brotolimicola acetigignens	Fish ffq	0.101193	0.130394	0.438953	0.835327
Clostridium sp AM49 4BH	Spirits ffq	0.065944	0.094313	0.485513	0.835486
GGB3486 SGB4658	Butter ffq	-0.04633	0.06735	0.492592	0.835744
Fusicatenibacter saccharivorans	Red meat ffq	0.061728	0.08246	0.455239	0.835837
Oscillibacter sp MSJ 31	Fish ffq	-0.08354	0.108304	0.441743	0.835926
Parabacteroides distasonis	Pasta or rice ffq	-0.06127	0.088025	0.487461	0.836542
Eubacterium rectale	Red meat ffq	-0.10005	0.139588	0.47462	0.836776
Faecalibacterium sp HTFF	Beer ffq	0.069307	0.095796	0.470464	0.836896
Dorea formicigenerans	Eggs ffq	-0.04623	0.063913	0.470537	0.837036
Anaerobutyricum soehngenii	Cold cuts ffq	-0.10133	0.130269	0.437889	0.837321
GGB1420 SGB1957	Eggs ffq	-0.06233	0.086977	0.474657	0.837464
Anaerostipes hadrus	Eggs ffq	-0.04723	0.065758	0.47367	0.837464
GGB9635 SGB15106	Yogurt ffq	-0.08576	0.117971	0.468386	0.837485
Ruminococcus SGB4421	Cheese ffq	-0.07813	0.099175	0.432015	0.838183
GGB9635 SGB15106	White meat ffq	-0.07979	0.120548	0.509071	0.838191
Bacteroides eggerthii	Cheese ffq	0.110155	0.14004	0.432739	0.838247
Coprococcus eutactus	Red meat ffq	-0.10981	0.155283	0.480558	0.839038
Blautia glucerasea	Bread ffq	-0.06913	0.092479	0.455909	0.839489
Bacteroides fragilis	Wine ffq	0.093856	0.122425	0.444489	0.839883
Faecalibacillus intestinalis	Olive oil ffq	-0.0692	0.096186	0.472885	0.840264
Collinsella aerofaciens	Bread ffq	-0.06927	0.095346	0.468653	0.840475
Lachnospira eligens	Bread ffq	0.092177	0.124806	0.461349	0.840475
GGB51647 SGB4348	Bread ffq	0.10416	0.141634	0.463219	0.840475
GGB9602 SGB15031	Bread ffq	0.074746	0.102627	0.467569	0.840475
GGB9708 SGB15234	Red meat ffq	-0.07933	0.112776	0.482844	0.840582
Bacteroides faecis	Bread ffq	0.080303	0.115576	0.488275	0.841116
Paraprevotella clara	Bread ffq	-0.06546	0.093946	0.487022	0.841116
Eubacterium rectale	Fish ffq	-0.10404	0.139568	0.457182	0.841955
Dorea formicigenerans	Fish ffq	-0.0478	0.063872	0.455439	0.841955
Parasutterella SGB9260	Fish ffq	-0.06493	0.089697	0.470261	0.841955
GGB9715 SGB15265	Fish ffq	0.076897	0.103711	0.459572	0.841955
Blautia SGB4815	Butter ffq	-0.05807	0.086623	0.503618	0.842189
Faecalibacillus intestinalis	Butter ffq	0.056939	0.085329	0.505624	0.842189
Phocaeicola massiliensis	Semi skimmed milk ffq	0.11265	0.148836	0.450288	0.842288
Dialister invisus	Vegetables ffq	0.072717	0.110311	0.510713	0.842594
Oscillibacter valericigenes	Butter ffq	-0.06248	0.09411	0.507794	0.842949
Ruminococcus callidus	Pasta or rice ffq	0.060741	0.090994	0.505432	0.843228
Bacteroides xylanisolvens	Pasta or rice ffq	0.082525	0.120964	0.496142	0.843228
Clostridium sp AF36 4	Pasta or rice ffq	-0.07428	0.113336	0.513223	0.843849
Oscillospiraceae bacterium	Eggs ffq	0.070888	0.102784	0.491445	0.843957
GGB3175 SGB4191	Eggs ffq	-0.07245	0.105256	0.492308	0.843957
Agathobaculum butyriciproducens	Eggs ffq	0.044627	0.065088	0.493983	0.844379
GGB4571 SGB6317	Eggs ffq	-0.07096	0.103858	0.495475	0.844379
Oscillospiraceae bacterium	Spirits ffq	-0.0685	0.099866	0.493815	0.844496
Alistipes ihumii	Spirits ffq	0.054156	0.079401	0.496237	0.844725
GGB3304 SGB4367	Semi skimmed milk ffq	-0.08207	0.109626	0.455238	0.844846
Lachnospira pectinoschiza	Olive oil ffq	0.085413	0.123807	0.491278	0.845426
Roseburia intestinalis	Olive oil ffq	0.088353	0.1301	0.498042	0.845426
GGB9635 SGB15106	Whole milk ffq	0.07477	0.116708	0.522713	0.845518
Simiaoa sunii	Yogurt ffq	-0.09689	0.13874	0.486078	0.845562
Clostridium sp AM22 11AC	Vegetables ffq	0.057786	0.09109	0.526746	0.846148
Candidatus Cibionibacter quicibialis	Butter ffq	-0.0738	0.113117	0.515141	0.84672
Bifidobacterium pseudocatenulatum	Butter ffq	-0.05719	0.087851	0.516045	0.84672
Fusicatenibacter saccharivorans	White meat ffq	0.052759	0.083692	0.529382	0.846945
Clostridiaceae bacterium	White meat ffq	-0.05125	0.082118	0.533528	0.846945
Acidaminococcus intestini	White meat ffq	0.057503	0.091695	0.531543	0.846945
Dysosmobacter welbionis	White meat ffq	0.04983	0.080199	0.535316	0.847505
Bacteroides eggerthii	Eggs ffq	-0.09515	0.14123	0.50147	0.848365
Parabacteroides merdae	Semi skimmed milk ffq	0.082544	0.113144	0.466775	0.848675
Bacteroides faecis	Semi skimmed milk ffq	0.084048	0.114346	0.463481	0.848675
Faecalibacterium SGB15346	Coffee ffq	-0.07526	0.111939	0.502436	0.848803
Roseburia hominis	Coffee ffq	0.076731	0.114337	0.5032	0.848803
Parasutterella excrementihominis	Coffee ffq	-0.07867	0.118035	0.506119	0.848803
Ruminococcus lactaris	Coffee ffq	-0.06643	0.098989	0.503164	0.848803
Faecalibacterium prausnitzii	Red meat ffq	0.061986	0.091173	0.497615	0.849656
Sutterella wadsworthensis	Red meat ffq	0.08405	0.128697	0.514679	0.849656
Candidatus Cibionibacter quicibialis	Red meat ffq	-0.07603	0.115563	0.511588	0.849656
Ruminococcus bromii	Red meat ffq	-0.1	0.153663	0.516182	0.849656
Lachnospira pectinoschiza	Fruit ffq	0.079867	0.1186	0.501734	0.849919
GGB9715 SGB15265	Fruit ffq	0.074505	0.109596	0.497662	0.849919
Ruminococcus SGB4421	Fruit ffq	0.073158	0.106978	0.4951	0.849919
Roseburia intestinalis	Fruit ffq	-0.08276	0.124205	0.506246	0.849919
GGB9635 SGB15106	Fruit ffq	-0.08326	0.125014	0.506426	0.849919
Oscillibacter sp ER4	Vegetables ffq	0.07548	0.122003	0.537011	0.849987
Clostridium sp AF36 4	Vegetables ffq	0.074122	0.119474	0.535878	0.849987
Roseburia hominis	Eggs ffq	-0.07463	0.11219	0.50692	0.850473
Wujia chipingensis	Wine ffq	-0.06198	0.085172	0.467946	0.850592
Coprococcus catus	Yogurt ffq	-0.04176	0.060454	0.490816	0.850667
GGB9342 SGB14306	Red meat ffq	-0.07222	0.111804	0.519269	0.850771
Bacteroides eggerthii	White meat ffq	0.08748	0.145737	0.549226	0.85088
GGB6606 SGB9340	Vegetables ffq	-0.05273	0.092787	0.57059	0.850889
Clostridium sp AM49 4BH	Vegetables ffq	-0.06176	0.103334	0.55096	0.850889
Bacteroides caccae	Vegetables ffq	-0.06427	0.112632	0.569078	0.850889
Agathobaculum butyriciproducens	Vegetables ffq	0.042002	0.069358	0.545683	0.850889
Lawsonibacter asaccharolyticus	Vegetables ffq	0.054197	0.088719	0.542171	0.850889
Lachnospira sp NSJ 43	Vegetables ffq	0.051553	0.090731	0.570719	0.850889
Faecalibacterium sp HTFF	Olive oil ffq	-0.07127	0.107408	0.507905	0.852126
Collinsella aerofaciens	Yogurt ffq	-0.06504	0.094976	0.494566	0.852161
Streptococcus thermophilus	Red meat ffq	0.05653	0.088835	0.525494	0.852348
Brotolimicola acetigignens	Pasta or rice ffq	-0.08178	0.130992	0.533362	0.852415
Phocaeicola dorei	Beer ffq	-0.11522	0.170286	0.499654	0.852422
Parabacteroides merdae	Beer ffq	0.074677	0.110326	0.4995	0.852422
Dysosmobacter welbionis	Red meat ffq	0.050224	0.079091	0.526344	0.852749
Bacteroides eggerthii	Olive oil ffq	0.095017	0.149279	0.525313	0.853079
Alistipes putredinis	Cold cuts ffq	-0.12489	0.178498	0.485189	0.853128
Eubacterium rectale	Cold cuts ffq	0.10002	0.140573	0.477865	0.853128
GGB9699 SGB15216	Cold cuts ffq	0.059748	0.085246	0.48445	0.853128
GGB9715 SGB15265	Cold cuts ffq	-0.0738	0.104439	0.480897	0.853128
GGB9342 SGB14306	Cold cuts ffq	-0.07938	0.112257	0.480603	0.853128
Alistipes communis	Eggs ffq	-0.05866	0.093007	0.529186	0.853309
Oscillibacter valericigenes	Eggs ffq	0.061354	0.096377	0.525318	0.853309
Eubacterium rectale	Bread ffq	-0.09429	0.139731	0.500843	0.853519
Dorea longicatena	Bread ffq	-0.07065	0.104545	0.500218	0.853519
Lawsonibacter asaccharolyticus	Butter ffq	0.051294	0.081426	0.529701	0.853552
Blautia sp MCC283	Semi skimmed milk ffq	-0.08716	0.12575	0.489266	0.853823
Bacteroides finegoldii	Eggs ffq	-0.05696	0.091351	0.533845	0.854151
Anaerobutyricum hallii	Pasta or rice ffq	0.055023	0.09065	0.54476	0.854242
Faecalibacillus intestinalis	Pasta or rice ffq	0.053539	0.087771	0.542788	0.854242
Blautia SGB4815	Coffee ffq	0.058396	0.090593	0.520169	0.854245
GGB51647 SGB4348	Butter ffq	0.086212	0.1384	0.534275	0.854311
Blautia glucerasea	White meat ffq	-0.05596	0.094068	0.552819	0.854576
GGB9758 SGB15368	Cold cuts ffq	-0.09696	0.140047	0.489806	0.855198
Phocaeicola vulgatus	Bread ffq	-0.11124	0.1693	0.512121	0.855223
Phocaeicola massiliensis	Bread ffq	-0.09939	0.150875	0.51106	0.855223
Eubacterium ventriosum	Bread ffq	0.048244	0.074723	0.5195	0.855268
Oscillospiraceae bacterium CLA AA H250	Bread ffq	0.058275	0.090699	0.521558	0.855268
Streptococcus thermophilus	Bread ffq	-0.0562	0.087076	0.51972	0.855268
GGB9342 SGB14306	Whole milk ffq	0.068989	0.110465	0.533208	0.855433
Dorea formicigenerans	Wine ffq	0.045718	0.064709	0.48096	0.856321
Anaerobutyricum soehngenii	Vegetables ffq	-0.07583	0.137101	0.580975	0.856938
Bacteroides stercoris	Pasta or rice ffq	0.100024	0.168111	0.552737	0.856948
Bacteroides cellulosilyticus	Pasta or rice ffq	-0.07625	0.128239	0.55298	0.856948
Streptococcus salivarius	Eggs ffq	-0.06472	0.106227	0.543271	0.857017
GGB3304 SGB4367	Red meat ffq	0.069025	0.110532	0.53325	0.857178
Bacteroides ovatus	Wine ffq	0.09287	0.132812	0.485452	0.857271
Anaerostipes hadrus	Wine ffq	-0.04631	0.066611	0.487983	0.857346
Parasutterella excrementihominis	Bread ffq	0.073041	0.115686	0.528747	0.857391
Bacteroides stercoris	Spirits ffq	0.105643	0.162138	0.515665	0.85802
Roseburia inulinivorans	Vegetables ffq	-0.06753	0.122807	0.583177	0.858398
Blautia faecis	Spirits ffq	0.046547	0.073712	0.528673	0.858472
Oscillibacter sp MSJ 31	Spirits ffq	-0.06699	0.105056	0.524656	0.858472
GGB9342 SGB14306	Spirits ffq	-0.0701	0.108317	0.518512	0.858472
Phocaeicola massiliensis	Spirits ffq	-0.09359	0.145667	0.521534	0.858472
Coprococcus comes	Eggs ffq	0.050316	0.083323	0.546821	0.858638
Faecalibacterium sp HTFF	Eggs ffq	-0.05952	0.098663	0.547184	0.858638
GGB9602 SGB15031	Eggs ffq	-0.06181	0.102326	0.5467	0.858638
Coprococcus eutactus	Coffee ffq	-0.10014	0.158899	0.529523	0.858882
Oscillospiraceae bacterium	Yogurt ffq	-0.06813	0.102503	0.50727	0.859382
Candidatus Cibionibacter quicibialis	Coffee ffq	0.073067	0.118162	0.53726	0.859939
Bacteroides eggerthii	Coffee ffq	0.089585	0.146072	0.540597	0.859939
GGB9342 SGB14306	Coffee ffq	-0.07018	0.114003	0.539115	0.859939
Paraprevotella clara	Coffee ffq	-0.05844	0.095897	0.543194	0.859939
Phocaeicola massiliensis	Coffee ffq	-0.09346	0.153735	0.544128	0.859939
Clostridiaceae bacterium	Butter ffq	0.047419	0.078839	0.548458	0.860446
GGB9715 SGB15265	Butter ffq	-0.06014	0.101472	0.554279	0.860446
Lachnospira sp NSJ 43	Butter ffq	-0.05084	0.083642	0.544253	0.860446
Phocaeicola massiliensis	Fish ffq	-0.09756	0.150552	0.517929	0.860458
GGB9699 SGB15216	Semi skimmed milk ffq	-0.05702	0.084238	0.499458	0.86059
GGB3345 SGB4425	Semi skimmed milk ffq	0.057174	0.085189	0.503136	0.86059
Ruminococcus callidus	Semi skimmed milk ffq	-0.05911	0.089958	0.512089	0.86071
GGB4571 SGB6317	Semi skimmed milk ffq	0.067283	0.103384	0.516148	0.86071
Collinsella aerofaciens	Coffee ffq	0.058162	0.097465	0.551584	0.860822
Ruminococcus lactaris	Red meat ffq	-0.05822	0.096947	0.549053	0.860974
Alistipes communis	Vegetables ffq	-0.05363	0.098652	0.587452	0.86111
Faecalibacterium prausnitzii	Beer ffq	-0.05352	0.088365	0.5456	0.86152
Barnesiella intestinihominis	Beer ffq	-0.06732	0.11232	0.549802	0.86152
GGB9708 SGB15234	Beer ffq	-0.06503	0.109285	0.5527	0.86152
GGB1420 SGB1957	Beer ffq	-0.05012	0.084564	0.554222	0.86152
Oscillibacter valericigenes	Beer ffq	0.054352	0.093794	0.563093	0.86152
Bifidobacterium pseudocatenulatum	Beer ffq	-0.05156	0.087243	0.555393	0.86152
Mediterraneibacter faecis	Beer ffq	0.056339	0.094739	0.552919	0.86152
Coprococcus comes	Beer ffq	0.049351	0.080919	0.542843	0.86152
Anaerobutyricum soehngenii	Beer ffq	0.0748	0.125587	0.552315	0.86152
Coprococcus eutactus	Beer ffq	0.093104	0.150501	0.537085	0.86152
GGB4552 SGB6276	Beer ffq	0.054558	0.086145	0.527452	0.86152
Alistipes onderdonkii	Bread ffq	-0.08205	0.137003	0.550129	0.861835
GGB3304 SGB4367	Bread ffq	0.0675	0.110689	0.542914	0.861835
Blautia SGB4815	Wine ffq	-0.06151	0.089778	0.494303	0.861987
Clostridiales bacterium KLE1615	Eggs ffq	-0.04689	0.079963	0.558441	0.862026
Alistipes shahii	Beer ffq	-0.05723	0.100707	0.570674	0.862613
Bacteroides thetaiotaomicron	Butter ffq	0.074387	0.12871	0.564179	0.863121
Parabacteroides distasonis	Wine ffq	-0.05984	0.088857	0.501662	0.863127
GGB1420 SGB1957	Wine ffq	-0.05956	0.088411	0.501558	0.863127
Clostridium sp AM49 4BH	Wine ffq	0.066813	0.098263	0.497613	0.863127
GGB9699 SGB15216	Wine ffq	-0.05805	0.085706	0.499214	0.863127
Oscillospiraceae bacterium CLA AA H250	Wine ffq	-0.06196	0.091853	0.501028	0.863127
Lachnospira eligens	Beer ffq	-0.06758	0.121072	0.577522	0.863545
Blautia massiliensis	Wine ffq	0.071144	0.110035	0.518898	0.863554
Lachnospira eligens	Wine ffq	-0.08111	0.126251	0.521572	0.863554
Dialister invisus	Wine ffq	0.068017	0.105809	0.521297	0.863554
Collinsella aerofaciens	Olive oil ffq	-0.06239	0.103702	0.54828	0.863587
GGB3304 SGB4367	Olive oil ffq	-0.07246	0.120092	0.547084	0.863587
Bilophila wadsworthia	Olive oil ffq	0.06111	0.102755	0.552844	0.863685
Flavonifractor plautii	Olive oil ffq	0.070765	0.120145	0.556681	0.863685
Alistipes shahii	Fruit ffq	0.067871	0.110034	0.538274	0.864117
Clostridiales bacterium KLE1615	Yogurt ffq	-0.05155	0.079581	0.518143	0.864182
GGB9758 SGB15368	Spirits ffq	0.083482	0.134515	0.535795	0.864762
Alistipes communis	Pasta or rice ffq	-0.05283	0.093421	0.572555	0.864912
Bilophila wadsworthia	Pasta or rice ffq	0.053438	0.094275	0.571661	0.864912
Phocaeicola vulgatus	Cheese ffq	0.114907	0.165491	0.488521	0.865005
GGB9708 SGB15234	Yogurt ffq	-0.07079	0.1126	0.530522	0.86546
Agathobaculum butyriciproducens	Butter ffq	0.036033	0.063329	0.570226	0.865705
Bilophila wadsworthia	Beer ffq	-0.05044	0.091123	0.580679	0.86598
Sutterella wadsworthensis	Semi skimmed milk ffq	-0.08165	0.127741	0.52364	0.866113
Eubacterium siraeum	Semi skimmed milk ffq	-0.07293	0.114609	0.525494	0.866113
Eubacterium rectale	Beer ffq	0.07406	0.135436	0.585286	0.866973
Ruminococcus bicirculans	Red meat ffq	0.080742	0.141892	0.570174	0.867293
Blautia faecis	Red meat ffq	0.043041	0.076036	0.572174	0.867293
GGB3304 SGB4367	Coffee ffq	-0.06494	0.11304	0.566488	0.867297
Faecalibacterium prausnitzii	Yogurt ffq	-0.05685	0.090982	0.53304	0.867569
Clostridium sp AM22 11AC	Semi skimmed milk ffq	0.053261	0.085381	0.533682	0.867616
Oscillospiraceae bacterium CLA AA H250	Beer ffq	-0.04786	0.088227	0.588262	0.867686
GGB9708 SGB15234	Spirits ffq	0.064032	0.109432	0.559327	0.868504
Bacteroides cellulosilyticus	Spirits ffq	0.073864	0.123903	0.551964	0.868504
GGB3345 SGB4425	Vegetables ffq	0.047622	0.090729	0.600391	0.868823
Ruminococcus bicirculans	Whole milk ffq	0.079041	0.140183	0.573704	0.868839
Anaerobutyricum soehngenii	Fish ffq	-0.08182	0.129453	0.528334	0.868898
Parabacteroides merdae	Coffee ffq	0.06517	0.116751	0.577524	0.868974
Bacteroides clarus	Bread ffq	-0.05903	0.102786	0.566634	0.869289
Bifidobacterium adolescentis	Wine ffq	-0.0866	0.138491	0.532682	0.869482
Ruminococcus callidus	Wine ffq	-0.05561	0.091862	0.545805	0.869482
Ruminococcus bicirculans	Wine ffq	0.086929	0.143465	0.54549	0.869482
Anaerobutyricum hallii	Wine ffq	0.055783	0.09147	0.542867	0.869482
Coprococcus catus	Wine ffq	0.036342	0.061457	0.555173	0.869482
Phocaeicola massiliensis	Wine ffq	-0.09281	0.152249	0.543028	0.869482
Flavonifractor plautii	Vegetables ffq	-0.06067	0.116045	0.60186	0.869627
Alistipes ihumii	Pasta or rice ffq	-0.0448	0.082061	0.585905	0.869646
Dorea longicatena	White meat ffq	-0.0591	0.106358	0.579266	0.86982
Bifidobacterium bifidum	Semi skimmed milk ffq	0.055362	0.089601	0.537586	0.869967
Agathobaculum butyriciproducens	Fish ffq	0.040843	0.064927	0.530274	0.870067
Bifidobacterium pseudocatenulatum	Wine ffq	0.05321	0.091083	0.559977	0.870392
Clostridium fessum	White meat ffq	0.041905	0.075802	0.581222	0.870419
GGB9715 SGB15265	White meat ffq	0.058054	0.105633	0.583419	0.870419
Ruminococcus callidus	Fish ffq	0.056917	0.090711	0.531296	0.870487
GGB9758 SGB15368	Fish ffq	-0.08651	0.139024	0.534698	0.870487
Ruminococcus bromii	Fish ffq	-0.09628	0.153871	0.532426	0.870487
Alistipes ihumii	Wine ffq	-0.04776	0.0827	0.564446	0.870959
Anaerostipes hadrus	Whole milk ffq	0.036026	0.06521	0.581427	0.871139
Faecalibacterium SGB15346	White meat ffq	-0.06075	0.111515	0.586738	0.871796
Blautia faecis	Yogurt ffq	0.044847	0.075675	0.554317	0.871995
Lachnospira sp NSJ 43	Yogurt ffq	-0.05108	0.085332	0.55035	0.871995
Blautia wexlerae	Semi skimmed milk ffq	-0.0454	0.075316	0.547506	0.872049
Bacteroides thetaiotaomicron	Spirits ffq	-0.07127	0.127556	0.577152	0.872266
Bacteroides ovatus	Spirits ffq	-0.07007	0.127157	0.582411	0.872266
Faecalibacterium sp HTFF	Spirits ffq	-0.053	0.095976	0.581595	0.872266
Ruminococcus bromii	Vegetables ffq	-0.08319	0.161724	0.607695	0.872307
Bilophila wadsworthia	Red meat ffq	0.052237	0.093971	0.579095	0.872339
Oscillibacter valericigenes	Vegetables ffq	-0.05156	0.102565	0.615899	0.872352
Alistipes onderdonkii	Cold cuts ffq	0.080928	0.137833	0.557984	0.872408
Barnesiella intestinihominis	Cold cuts ffq	0.070081	0.117214	0.550809	0.872408
Dysosmobacter welbionis	Cold cuts ffq	0.04805	0.079389	0.545917	0.872408
Bifidobacterium pseudocatenulatum	Cold cuts ffq	0.054149	0.090545	0.550729	0.872408
Anaerobutyricum soehngenii	Whole milk ffq	0.069273	0.128085	0.589415	0.873025
Alistipes shahii	Cheese ffq	0.067735	0.102045	0.507832	0.87305
Faecalibacillus intestinalis	Cheese ffq	0.056694	0.085724	0.509396	0.87305
GGB51647 SGB4348	Cheese ffq	-0.0909	0.138792	0.513479	0.87305
Blautia glucerasea	Vegetables ffq	0.049038	0.098079	0.617781	0.873187
Clostridium sp AM49 4BH	Red meat ffq	-0.05374	0.097434	0.582049	0.873471
Ruminococcus bromii	Wine ffq	0.089346	0.155771	0.567106	0.873478
Blautia sp MCC283	Cold cuts ffq	-0.07333	0.127826	0.567026	0.873627
Ruminococcus bicirculans	Eggs ffq	-0.07617	0.141717	0.591716	0.873691
Roseburia faecis	Semi skimmed milk ffq	0.08963	0.149756	0.550381	0.873699
Anaerobutyricum hallii	Eggs ffq	0.048379	0.090182	0.592409	0.873803
GGB6606 SGB9340	Cold cuts ffq	-0.05038	0.088168	0.56852	0.874076
Bacteroides xylanisolvens	Semi skimmed milk ffq	-0.07	0.119773	0.559791	0.874638
Ruminococcus bicirculans	White meat ffq	-0.07758	0.144063	0.591022	0.87501
Candidatus Cibionibacter quicibialis	Pasta or rice ffq	-0.06097	0.11608	0.600158	0.875205
Lachnospira eligens	Yogurt ffq	-0.07175	0.124305	0.5647	0.875323
Candidatus Cibionibacter quicibialis	Cheese ffq	0.073215	0.113361	0.519339	0.875557
Bacteroides cellulosilyticus	Semi skimmed milk ffq	0.073063	0.126816	0.565371	0.875893
Ruminococcus lactaris	Whole milk ffq	-0.05141	0.095894	0.592633	0.875958
GGB9758 SGB15368	Vegetables ffq	-0.0715	0.144629	0.621735	0.875997
Sutterella wadsworthensis	Cheese ffq	0.074953	0.126477	0.554308	0.876481
Ruminococcus bicirculans	Cheese ffq	0.084038	0.138915	0.546126	0.876481
Anaerobutyricum hallii	Cheese ffq	0.053586	0.088555	0.545998	0.876481
GGB9758 SGB15368	Cheese ffq	0.079879	0.136215	0.558477	0.876481
Phocaeicola massiliensis	Cheese ffq	0.086633	0.147511	0.557869	0.876481
Eubacterium rectale	Semi skimmed milk ffq	0.079488	0.138646	0.567271	0.876573
Fusicatenibacter saccharivorans	Fruit ffq	-0.04823	0.086996	0.580109	0.87742
Bacteroides faecis	Fruit ffq	-0.06707	0.122084	0.583564	0.87742
GGB9602 SGB15031	Fruit ffq	-0.05874	0.108391	0.588665	0.87742
Fusicatenibacter saccharivorans	Spirits ffq	0.041782	0.079983	0.602149	0.877611
Alistipes shahii	Spirits ffq	0.05413	0.100901	0.592413	0.877611
Alistipes shahii	Yogurt ffq	-0.05839	0.103831	0.574717	0.877623
Candidatus Cibionibacter quicibialis	Yogurt ffq	-0.06484	0.115352	0.574847	0.877623
Ruminococcus bicirculans	Coffee ffq	0.077818	0.144707	0.591546	0.878489
Faecalibacillus intestinalis	Coffee ffq	-0.04801	0.089358	0.591863	0.878489
GGB4552 SGB6276	Fish ffq	-0.05238	0.088384	0.554299	0.878766
Gemmiger formicilis	Butter ffq	0.057062	0.10712	0.595026	0.878853
Faecalicatena fissicatena	Fish ffq	-0.0538	0.094786	0.57116	0.878978
Eubacterium siraeum	Fish ffq	-0.06563	0.115242	0.569852	0.878978
Bacteroides eggerthii	Fish ffq	-0.08217	0.143093	0.566629	0.878978
GGB9635 SGB15106	Fish ffq	-0.06763	0.118447	0.56886	0.878978
Parabacteroides distasonis	Semi skimmed milk ffq	0.0493	0.087107	0.572233	0.879086
Clostridium sp AM49 4BH	Semi skimmed milk ffq	-0.05448	0.096612	0.573641	0.879086
Alistipes ihumii	Whole milk ffq	0.04248	0.080955	0.600535	0.879521
Phocaeicola massiliensis	Whole milk ffq	0.07799	0.148078	0.599168	0.879521
Faecalibacterium prausnitzii	Cheese ffq	0.051119	0.089485	0.568672	0.879907
Alistipes finegoldii	White meat ffq	-0.06564	0.1263	0.604039	0.879969
Bifidobacterium bifidum	White meat ffq	-0.04775	0.091996	0.604489	0.879969
Bacteroides eggerthii	Vegetables ffq	-0.07079	0.147083	0.630956	0.880244
Oscillibacter sp MSJ 31	Bread ffq	0.05942	0.108521	0.584824	0.880601
Blautia sp MCC283	Yogurt ffq	0.067453	0.126498	0.59465	0.880779
Anaerostipes hadrus	Pasta or rice ffq	-0.0342	0.066113	0.605728	0.88092
Anaerostipes hadrus	Olive oil ffq	-0.03884	0.072644	0.593566	0.881017
Agathobaculum butyriciproducens	Spirits ffq	0.032236	0.063265	0.611104	0.881185
Acidaminococcus intestini	Eggs ffq	-0.04666	0.08963	0.603417	0.881774
Parabacteroides distasonis	Whole milk ffq	-0.04465	0.086811	0.607779	0.881778
Ruminococcus gnavus	Semi skimmed milk ffq	0.053325	0.097325	0.584549	0.882029
Blautia glucerasea	Semi skimmed milk ffq	-0.05081	0.091894	0.581089	0.882029
Phocaeicola vulgatus	Semi skimmed milk ffq	0.091147	0.167345	0.586773	0.882029
Oscillibacter sp MSJ 31	Semi skimmed milk ffq	0.059727	0.107539	0.579439	0.882029
Faecalibacterium sp HTFF	Semi skimmed milk ffq	0.05375	0.098216	0.584985	0.882029
Alistipes onderdonkii	White meat ffq	0.071279	0.13929	0.60959	0.882587
Bacteroides clarus	Spirits ffq	0.050174	0.099368	0.614337	0.883289
Parasutterella SGB9260	Bread ffq	0.048539	0.089859	0.589885	0.883419
Roseburia inulinivorans	Bread ffq	-0.06183	0.114754	0.590841	0.883454
Bacteroides caccae	Beer ffq	-0.05133	0.103531	0.620772	0.884045
Anaerobutyricum hallii	Beer ffq	-0.04345	0.087638	0.6207	0.884045
Bacteroides eggerthii	Beer ffq	-0.06897	0.138021	0.617988	0.884045
Bacteroides cellulosilyticus	Cold cuts ffq	0.070942	0.128814	0.582629	0.884248
Clostridiaceae bacterium	Wine ffq	0.044432	0.081828	0.587948	0.884262
Roseburia faecis	Yogurt ffq	-0.07811	0.150366	0.604215	0.884765
Bacteroides finegoldii	Yogurt ffq	0.047845	0.091469	0.601689	0.884765
Blautia sp MCC283	Bread ffq	-0.06817	0.12707	0.592424	0.884887
Bifidobacterium pseudocatenulatum	Spirits ffq	-0.04358	0.087302	0.618384	0.885856
Blautia obeum	Spirits ffq	0.051069	0.102816	0.620112	0.885856
Bacteroides clarus	Cold cuts ffq	0.05604	0.103417	0.588695	0.885858
GGB6606 SGB9340	Whole milk ffq	-0.04349	0.086671	0.616565	0.885974
Lachnospira eligens	Fish ffq	-0.06774	0.12478	0.588052	0.886013
Bacteroides faecis	Fish ffq	0.062538	0.115574	0.58925	0.886013
Gemmiger formicilis	Whole milk ffq	0.053929	0.108239	0.61902	0.886281
GGB9699 SGB15216	Yogurt ffq	-0.04333	0.084389	0.608366	0.886377
Alistipes finegoldii	Coffee ffq	0.063315	0.126828	0.618343	0.886514
Oscillibacter sp ER4	Eggs ffq	-0.05914	0.115457	0.609234	0.886614
Clostridiaceae bacterium	Eggs ffq	0.039562	0.081025	0.626061	0.887079
Blautia glucerasea	Eggs ffq	0.044886	0.092426	0.627911	0.887079
Bacteroides fragilis	Vegetables ffq	0.058804	0.1287	0.648362	0.887126
Bacteroides finegoldii	Coffee ffq	0.046191	0.093764	0.622983	0.888041
Akkermansia muciniphila	Fruit ffq	-0.07004	0.133268	0.599997	0.888179
Dysosmobacter welbionis	Beer ffq	0.036709	0.076858	0.633581	0.888274
Clostridiales bacterium KLE1615	Beer ffq	-0.03753	0.077926	0.630741	0.888274
Clostridium sp AF36 4	Yogurt ffq	-0.05649	0.11263	0.616686	0.889091
Ruminococcus lactaris	Bread ffq	0.048629	0.097003	0.61688	0.889204
Wujia chipingensis	Fruit ffq	0.04529	0.088943	0.611374	0.889318
Dysosmobacter welbionis	Fruit ffq	-0.04198	0.083425	0.615561	0.889422
GGB3304 SGB4367	Cold cuts ffq	-0.05927	0.111414	0.595551	0.889557
Gemmiger formicilis	Cheese ffq	0.058468	0.107348	0.58678	0.889593
Parabacteroides merdae	Wine ffq	0.059748	0.11574	0.606437	0.889659
Roseburia faecis	Wine ffq	-0.0799	0.1528	0.60179	0.889659
Roseburia inulinivorans	Butter ffq	0.05619	0.112053	0.616783	0.889976
Faecalibacterium SGB15346	Cheese ffq	-0.05769	0.107423	0.592052	0.890419
Lachnospira sp NSJ 43	Cheese ffq	-0.04547	0.084027	0.58923	0.890419
GGB1420 SGB1957	Yogurt ffq	-0.04288	0.087059	0.623051	0.89045
Blautia faecis	Butter ffq	0.035834	0.074268	0.63016	0.890501
Ruminococcus gnavus	Butter ffq	-0.04607	0.095482	0.630139	0.890501
Phocaeicola vulgatus	Butter ffq	-0.07681	0.165547	0.643349	0.890501
Bacteroides faecis	Butter ffq	0.05626	0.11307	0.619531	0.890501
Bacteroides thetaiotaomicron	Coffee ffq	0.065331	0.134492	0.627851	0.890818
Faecalibacillus intestinalis	Whole milk ffq	-0.04036	0.086601	0.641876	0.892241
Blautia wexlerae	Fish ffq	0.0396	0.075871	0.602473	0.892365
Coprococcus eutactus	Fish ffq	-0.08137	0.155675	0.601947	0.892365
Anaerobutyricum soehngenii	Pasta or rice ffq	-0.06326	0.13001	0.627287	0.892509
Bacteroides fragilis	Spirits ffq	0.056395	0.117568	0.632134	0.89305
Candidatus Cibionibacter quicibialis	Cold cuts ffq	-0.06099	0.116553	0.601551	0.893139
Oscillibacter valericigenes	Fish ffq	-0.04987	0.096443	0.605841	0.893216
Bifidobacterium pseudocatenulatum	Fish ffq	-0.04611	0.089983	0.609105	0.893216
Clostridium sp AM22 11AC	Fish ffq	-0.04265	0.086031	0.620809	0.893216
Faecalibacillus intestinalis	Fish ffq	0.044593	0.087453	0.610865	0.893216
Dialister invisus	Fish ffq	-0.05291	0.104497	0.613352	0.893216
Blautia SGB4815	Red meat ffq	-0.04472	0.088703	0.614854	0.89346
Candidatus Cibionibacter quicibialis	Whole milk ffq	0.052239	0.114342	0.648417	0.893668
Mediterraneibacter faecis	Whole milk ffq	0.044324	0.096785	0.647617	0.893668
Parasutterella excrementihominis	Eggs ffq	-0.05424	0.115106	0.638157	0.893798
Ruminococcus callidus	Coffee ffq	-0.04404	0.092711	0.635455	0.893902
GGB9635 SGB15106	Olive oil ffq	-0.0616	0.125138	0.623186	0.894359
Agathobaculum butyriciproducens	Coffee ffq	-0.0313	0.066401	0.638111	0.894619
Faecalibacterium sp HTFF	Fish ffq	-0.04865	0.09904	0.623999	0.89522
Eubacterium ventriosum	Wine ffq	0.036995	0.075782	0.626135	0.895563
Faecalibacillus intestinalis	Wine ffq	0.043755	0.088567	0.622008	0.895563
Bacteroides finegoldii	Wine ffq	0.045451	0.092925	0.625457	0.895563
GGB6606 SGB9340	Coffee ffq	-0.04169	0.089506	0.64201	0.895613
Acidaminococcus intestini	Coffee ffq	0.043078	0.092075	0.640562	0.895613
GGB4571 SGB6317	Coffee ffq	0.049545	0.106554	0.642613	0.895613
Bacteroides xylanisolvens	Fish ffq	0.058946	0.12059	0.625685	0.896437
Blautia obeum	Fish ffq	0.051654	0.10601	0.626785	0.896437
Roseburia hominis	Olive oil ffq	-0.05917	0.124476	0.635214	0.896528
Ruminococcus lactaris	Beer ffq	-0.0433	0.094051	0.645844	0.896586
Bifidobacterium longum	Cold cuts ffq	0.052937	0.10361	0.610149	0.896786
GGB1420 SGB1957	Cold cuts ffq	-0.04439	0.087995	0.614652	0.896812
Clostridium fessum	Cold cuts ffq	-0.03781	0.075064	0.615176	0.896812
Collinsella aerofaciens	Cold cuts ffq	0.047232	0.096041	0.623592	0.896812
Lachnospira eligens	Cold cuts ffq	-0.06246	0.125665	0.61991	0.896812
Alistipes finegoldii	Cold cuts ffq	0.061511	0.125022	0.623429	0.896812
Eubacterium siraeum	Cold cuts ffq	-0.05849	0.116042	0.614963	0.896812
GGB47687 SGB2286	Butter ffq	0.044962	0.100424	0.655006	0.897307
Bifidobacterium longum	Wine ffq	-0.05059	0.104242	0.628145	0.897327
Bacteroides xylanisolvens	Olive oil ffq	0.062259	0.132102	0.638054	0.898097
Lachnospira eligens	Olive oil ffq	-0.06433	0.136779	0.638747	0.89816
Streptococcus thermophilus	Olive oil ffq	-0.04625	0.098506	0.639368	0.89816
Lachnospira sp NSJ 43	Pasta or rice ffq	-0.04076	0.086	0.636232	0.89821
Blautia obeum	Whole milk ffq	0.046945	0.104895	0.655118	0.898883
Coprococcus eutactus	Cold cuts ffq	-0.07624	0.156833	0.627598	0.899239
Bacteroides ovatus	White meat ffq	-0.06264	0.133617	0.639862	0.899747
Bacteroides fragilis	Beer ffq	-0.0523	0.117816	0.657716	0.899832
GGB33469 SGB15236	White meat ffq	-0.04175	0.089612	0.641959	0.900014
Oscillibacter sp ER4	Olive oil ffq	-0.05538	0.126006	0.660846	0.900292
Faecalibacterium SGB15346	Olive oil ffq	-0.05399	0.118502	0.649289	0.900292
Alistipes ihumii	Olive oil ffq	-0.0398	0.090273	0.659923	0.900292
Dorea formicigenerans	Olive oil ffq	-0.0308	0.070385	0.662284	0.900292
Paraprevotella clara	Olive oil ffq	0.046382	0.10227	0.65076	0.900292
GGB9699 SGB15216	Red meat ffq	-0.04093	0.084963	0.630656	0.901272
Bacteroides uniformis	Cold cuts ffq	0.048295	0.101612	0.635259	0.901404
Lachnospira pectinoschiza	Bread ffq	0.051895	0.112206	0.644414	0.901557
Clostridium fessum	Bread ffq	0.033451	0.074601	0.654521	0.901557
Faecalicatena fissicatena	Bread ffq	0.043551	0.094866	0.64684	0.901557
Blautia SGB4815	Bread ffq	0.039852	0.088805	0.654253	0.901557
GGB9758 SGB15368	Bread ffq	0.062817	0.139332	0.652756	0.901557
Phocaeicola dorei	Yogurt ffq	0.078689	0.176136	0.655687	0.901847
Oscillibacter sp ER4	Yogurt ffq	0.051433	0.115387	0.656421	0.901847
Clostridiaceae bacterium	Yogurt ffq	-0.03735	0.080534	0.643457	0.901847
Dorea longicatena	Yogurt ffq	-0.04717	0.104174	0.651348	0.901847
Anaerobutyricum soehngenii	Yogurt ffq	0.059346	0.129109	0.646429	0.901847
Eubacterium siraeum	Yogurt ffq	-0.05183	0.114869	0.652481	0.901847
Coprococcus eutactus	Pasta or rice ffq	0.071987	0.156108	0.64537	0.902148
Alistipes communis	Spirits ffq	0.04077	0.090384	0.65257	0.902271
Eubacterium siraeum	Spirits ffq	0.050629	0.112043	0.651997	0.902271
GGB47687 SGB2286	Bread ffq	0.045464	0.102849	0.659097	0.902563
Sutterella wadsworthensis	Olive oil ffq	0.058668	0.135933	0.666584	0.902627
GGB6606 SGB9340	Semi skimmed milk ffq	0.043067	0.087026	0.621382	0.9027
Oscillibacter valericigenes	Semi skimmed milk ffq	0.047537	0.095925	0.620902	0.9027
Acidaminococcus intestini	Semi skimmed milk ffq	0.045396	0.089308	0.611979	0.9027
Parasutterella SGB9260	Semi skimmed milk ffq	0.043347	0.089095	0.6273	0.9027
Dialister invisus	Semi skimmed milk ffq	0.051783	0.103728	0.618336	0.9027
GGB3175 SGB4191	Semi skimmed milk ffq	-0.0529	0.104776	0.614331	0.9027
Bacteroides thetaiotaomicron	Vegetables ffq	0.056796	0.138652	0.682633	0.902761
Lawsonibacter asaccharolyticus	White meat ffq	0.038561	0.084913	0.650401	0.90291
Bacteroides fragilis	Fish ffq	0.056204	0.121015	0.643001	0.903268
Faecalibacterium prausnitzii	Fruit ffq	0.043576	0.096493	0.652207	0.90352
Barnesiella intestinihominis	Fruit ffq	-0.05434	0.122958	0.659136	0.90352
Bacteroides ovatus	Fruit ffq	0.063536	0.138721	0.647596	0.90352
Streptococcus thermophilus	Fruit ffq	0.043085	0.092734	0.642903	0.90352
GGB9342 SGB14306	Fruit ffq	-0.05446	0.118004	0.64508	0.90352
GGB3304 SGB4367	Fruit ffq	-0.05481	0.11693	0.639959	0.90352
Paraprevotella clara	Fruit ffq	0.044575	0.099256	0.654008	0.90352
Parabacteroides merdae	Whole milk ffq	0.048409	0.112753	0.668279	0.903812
Bacteroides uniformis	Bread ffq	0.044324	0.101005	0.661409	0.904011
Paraprevotella clara	Semi skimmed milk ffq	-0.04451	0.093193	0.633634	0.904479
Parasutterella SGB9260	Cheese ffq	0.041632	0.088032	0.636952	0.904698
Roseburia inulinivorans	Cheese ffq	0.053294	0.112903	0.63758	0.904698
GGB3486 SGB4658	Cheese ffq	-0.03256	0.067983	0.6327	0.904698
GGB3345 SGB4425	Cheese ffq	-0.04171	0.084224	0.621151	0.904698
Oscillibacter sp ER4	Red meat ffq	-0.05439	0.115746	0.639058	0.904907
Streptococcus thermophilus	Butter ffq	0.036031	0.085435	0.673833	0.905263
Ruminococcus bromii	Bread ffq	0.067125	0.154182	0.663923	0.905287
Eubacterium siraeum	Whole milk ffq	0.047168	0.114205	0.680181	0.906055
Lachnospira pectinoschiza	Fish ffq	-0.05094	0.112216	0.65052	0.906085
Alistipes ihumii	Fruit ffq	0.037394	0.0864	0.665778	0.906137
Bacteroides cellulosilyticus	Bread ffq	0.054905	0.128071	0.66875	0.906173
Faecalicatena fissicatena	Vegetables ffq	0.039741	0.100378	0.692695	0.906336
Blautia massiliensis	Fish ffq	0.048824	0.108769	0.654163	0.906356
Coprococcus comes	Fruit ffq	0.037023	0.08834	0.675739	0.906806
Bacteroides uniformis	Pasta or rice ffq	0.042153	0.101258	0.67778	0.906904
Roseburia intestinalis	Pasta or rice ffq	-0.04932	0.118234	0.677153	0.906904
Alistipes communis	Fish ffq	0.040591	0.093139	0.663592	0.907871
Alistipes shahii	Eggs ffq	-0.04581	0.103671	0.65922	0.907994
Streptococcus thermophilus	Eggs ffq	0.039093	0.088386	0.658904	0.907994
GGB3175 SGB4191	Olive oil ffq	0.047674	0.115316	0.679838	0.908161
Blautia sp MCC283	White meat ffq	-0.0561	0.12921	0.664781	0.908278
Bacteroides ovatus	Cheese ffq	0.059217	0.128658	0.645981	0.90835
Clostridiaceae bacterium	Semi skimmed milk ffq	-0.03733	0.080567	0.643802	0.908362
GGB9699 SGB15216	Whole milk ffq	0.033911	0.083941	0.686786	0.908363
Bacteroides faecis	Whole milk ffq	-0.04631	0.114059	0.685303	0.908363
Paraprevotella clara	Vegetables ffq	0.03806	0.09916	0.701621	0.908453
Ruminococcus callidus	Vegetables ffq	-0.03573	0.095599	0.709077	0.908787
GGB51647 SGB4348	Pasta or rice ffq	0.057863	0.142156	0.68455	0.908858
Clostridium sp AF36 4	Beer ffq	-0.04514	0.109635	0.681085	0.90898
Blautia SGB4815	Beer ffq	0.035856	0.086029	0.677409	0.90898
Phocaeicola vulgatus	Beer ffq	0.0682	0.163205	0.67662	0.90898
Blautia sp MCC283	Whole milk ffq	0.049782	0.125447	0.692035	0.909497
Dysosmobacter welbionis	Whole milk ffq	-0.03085	0.078199	0.693731	0.909783
Oscillibacter sp ER4	Coffee ffq	0.042675	0.118317	0.718837	0.909971
Gemmiger formicilis	Coffee ffq	-0.04712	0.111961	0.674457	0.909971
Clostridium fessum	Coffee ffq	-0.0303	0.076196	0.691416	0.909971
Bacteroides xylanisolvens	Coffee ffq	-0.05239	0.123248	0.671391	0.909971
Streptococcus salivarius	Coffee ffq	-0.04275	0.10829	0.693568	0.909971
Blautia wexlerae	Coffee ffq	-0.03071	0.077565	0.692672	0.909971
GGB3175 SGB4191	Coffee ffq	-0.04371	0.107862	0.685881	0.909971
Oscillibacter sp MSJ 31	Coffee ffq	-0.04392	0.110838	0.692458	0.909971
Roseburia intestinalis	Coffee ffq	-0.04682	0.120246	0.697583	0.909971
Bacteroides caccae	Fish ffq	0.045244	0.106976	0.672942	0.91011
GGB1420 SGB1957	Butter ffq	-0.03467	0.085437	0.685486	0.910948
Blautia SGB4815	Spirits ffq	0.036312	0.086039	0.673589	0.910986
Parasutterella SGB9260	Coffee ffq	-0.03192	0.09181	0.728587	0.91113
Bacteroides stercoris	Beer ffq	-0.06505	0.161723	0.688081	0.91115
GGB9758 SGB15368	Beer ffq	-0.05447	0.134273	0.68558	0.91115
Brotolimicola acetigignens	Coffee ffq	0.045888	0.133425	0.73139	0.911306
Fusicatenibacter saccharivorans	Coffee ffq	0.028177	0.084182	0.738301	0.911306
Oscillospiraceae bacterium	Coffee ffq	-0.03468	0.105234	0.742164	0.911306
Coprococcus comes	Coffee ffq	0.028486	0.085417	0.739228	0.911306
Clostridium sp AM22 11AC	White meat ffq	0.037427	0.087544	0.669611	0.912033
GGB3175 SGB4191	Whole milk ffq	0.040168	0.10441	0.700981	0.912077
Alistipes ihumii	Beer ffq	0.031327	0.079614	0.694497	0.912197
Anaerostipes hadrus	Beer ffq	-0.02465	0.064127	0.701247	0.912197
Coprococcus catus	Olive oil ffq	-0.02698	0.066779	0.68677	0.912257
Ruminococcus bicirculans	Olive oil ffq	0.059312	0.156055	0.704396	0.912262
Phocaeicola vulgatus	Olive oil ffq	-0.0699	0.179124	0.696864	0.912262
Ruminococcus bromii	Olive oil ffq	-0.06702	0.166349	0.687538	0.912262
Lachnospira eligens	Whole milk ffq	0.045638	0.123532	0.712318	0.912505
GGB47687 SGB2286	Whole milk ffq	0.03622	0.101648	0.722093	0.912505
Lachnospira eligens	Spirits ffq	-0.04885	0.121107	0.687253	0.91333
Blautia obeum	Pasta or rice ffq	-0.0423	0.106427	0.691606	0.913539
Anaerobutyricum soehngenii	Eggs ffq	0.054691	0.129323	0.672961	0.913567
Bifidobacterium pseudocatenulatum	Coffee ffq	-0.0294	0.091979	0.749709	0.913586
Blautia wexlerae	Beer ffq	-0.02786	0.073644	0.705679	0.913608
GGB3304 SGB4367	Spirits ffq	0.042057	0.107295	0.695627	0.914097
Oscillospiraceae bacterium	Fish ffq	0.041649	0.102943	0.68636	0.914117
Faecalibacterium SGB15346	Cold cuts ffq	-0.04794	0.110412	0.66479	0.914351
Bacteroides xylanisolvens	Cold cuts ffq	0.052591	0.121431	0.665571	0.914351
Roseburia intestinalis	Cold cuts ffq	0.050889	0.118377	0.667898	0.914351
Blautia faecis	Whole milk ffq	0.025259	0.075252	0.737585	0.914658
Bacteroides caccae	Spirits ffq	0.039415	0.103674	0.704341	0.914965
Oscillibacter valericigenes	Spirits ffq	-0.03274	0.093723	0.727309	0.914965
Simiaoa sunii	Spirits ffq	0.04941	0.135397	0.71569	0.914965
Ruminococcus gnavus	Spirits ffq	-0.03378	0.095135	0.723053	0.914965
Ruminococcus SGB4421	Spirits ffq	0.035381	0.098201	0.719127	0.914965
Oscillospiraceae bacterium	Semi skimmed milk ffq	-0.046	0.102298	0.653569	0.915257
GGB9708 SGB15234	Semi skimmed milk ffq	0.050528	0.112053	0.652679	0.915257
Clostridium sp AF36 4	Olive oil ffq	-0.041	0.123461	0.740224	0.915422
Clostridium sp AM49 4BH	Olive oil ffq	-0.03635	0.107407	0.735521	0.915422
Bacteroides thetaiotaomicron	Olive oil ffq	0.049991	0.142702	0.726548	0.915422
Blautia SGB4815	Olive oil ffq	-0.03214	0.09677	0.74022	0.915422
Ruminococcus lactaris	Olive oil ffq	-0.0372	0.106003	0.726057	0.915422
Bacteroides fragilis	Olive oil ffq	0.048094	0.133482	0.719088	0.915422
GGB47687 SGB2286	Olive oil ffq	-0.04062	0.111987	0.717309	0.915422
GGB3345 SGB4425	Olive oil ffq	0.031441	0.093626	0.737436	0.915422
Fusicatenibacter saccharivorans	Pasta or rice ffq	0.031637	0.082719	0.702642	0.915528
Blautia massiliensis	Pasta or rice ffq	-0.04241	0.109135	0.698143	0.915528
GGB4571 SGB6317	Cold cuts ffq	0.044791	0.105067	0.670491	0.91554
Phocaeicola dorei	Olive oil ffq	-0.05874	0.186043	0.752584	0.915784
Coprococcus comes	Olive oil ffq	0.030023	0.09109	0.742119	0.915784
Oscillibacter sp ER4	Pasta or rice ffq	0.041635	0.116205	0.720624	0.915982
Dysosmobacter welbionis	Pasta or rice ffq	0.029344	0.0793	0.711868	0.915982
GGB9699 SGB15216	Pasta or rice ffq	-0.03061	0.085134	0.719707	0.915982
Sutterella wadsworthensis	Spirits ffq	0.042542	0.125042	0.734152	0.916039
Ruminococcus bicirculans	Spirits ffq	-0.04649	0.137657	0.736062	0.916039
Bifidobacterium adolescentis	Fish ffq	-0.04819	0.136896	0.72529	0.916238
GGB6606 SGB9340	Fish ffq	0.033901	0.087611	0.699328	0.916238
Mediterraneibacter faecis	Fish ffq	0.037536	0.097943	0.702071	0.916238
Wujia chipingensis	Fish ffq	-0.03306	0.084154	0.69502	0.916238
GGB3304 SGB4367	Fish ffq	0.043462	0.1107	0.695165	0.916238
GGB3345 SGB4425	Fish ffq	0.031447	0.085939	0.714933	0.916238
Bacteroides thetaiotaomicron	Cold cuts ffq	0.056329	0.132628	0.671659	0.916252
GGB33469 SGB15236	Yogurt ffq	-0.03601	0.087778	0.682218	0.916521
Agathobaculum butyriciproducens	Whole milk ffq	0.021313	0.064462	0.741388	0.916621
Ruminococcus gnavus	Olive oil ffq	-0.03353	0.10806	0.756739	0.916632
Eubacterium rectale	Whole milk ffq	-0.04512	0.138259	0.744619	0.916776
Wujia chipingensis	Whole milk ffq	0.026714	0.083366	0.749089	0.916776
Bifidobacterium longum	Butter ffq	-0.03826	0.100604	0.704246	0.916843
Blautia obeum	White meat ffq	0.044937	0.107887	0.677624	0.917318
Blautia SGB4815	Fruit ffq	0.037082	0.093789	0.693124	0.917431
Eubacterium rectale	White meat ffq	-0.05712	0.142215	0.688491	0.917662
Clostridium sp AM49 4BH	White meat ffq	-0.03962	0.098736	0.688844	0.917662
Eubacterium ventriosum	Eggs ffq	0.027991	0.075008	0.709537	0.917769
Bacteroides ovatus	Eggs ffq	0.049104	0.130695	0.707642	0.917769
Parasutterella SGB9260	Eggs ffq	0.035889	0.089534	0.689098	0.917769
GGB51647 SGB4348	Eggs ffq	0.056121	0.141227	0.691629	0.917769
Oscillospiraceae bacterium CLA AA H250	Olive oil ffq	-0.03039	0.099904	0.761369	0.917856
GGB1420 SGB1957	Fruit ffq	-0.0352	0.092335	0.70358	0.917908
Blautia glucerasea	Fruit ffq	0.036483	0.097806	0.709664	0.917908
GGB33469 SGB15236	Spirits ffq	-0.02813	0.085428	0.742382	0.91809
Alistipes communis	Yogurt ffq	0.037449	0.09284	0.68724	0.918274
Parabacteroides merdae	Butter ffq	-0.04087	0.112005	0.715728	0.918468
Clostridium sp AF36 4	Butter ffq	0.040255	0.110479	0.716094	0.918468
Phascolarctobacterium faecium	Butter ffq	-0.03977	0.108139	0.713556	0.918468
Alistipes putredinis	Butter ffq	0.05585	0.173621	0.748136	0.918669
Bacteroides caccae	Butter ffq	0.032591	0.104614	0.755826	0.918669
Coprococcus comes	Butter ffq	-0.02785	0.081713	0.733731	0.918669
Ruminococcus lactaris	Butter ffq	-0.03195	0.094775	0.736467	0.918669
Dialister invisus	Butter ffq	0.031926	0.1022	0.755175	0.918669
Eubacterium siraeum	Butter ffq	-0.03794	0.112616	0.736658	0.918669
Brotolimicola acetigignens	Spirits ffq	0.040141	0.126874	0.75215	0.918745
Oscillibacter sp ER4	White meat ffq	0.042977	0.117825	0.715805	0.919064
Alistipes communis	White meat ffq	0.033768	0.094776	0.722114	0.919064
Bifidobacterium pseudocatenulatum	White meat ffq	0.034492	0.091561	0.706931	0.919064
Akkermansia muciniphila	White meat ffq	-0.04491	0.128264	0.726713	0.919064
GGB4552 SGB6276	White meat ffq	-0.03463	0.089972	0.700866	0.919064
Bifidobacterium longum	Red meat ffq	-0.04298	0.102946	0.676857	0.919676
Lachnospira pectinoschiza	Red meat ffq	-0.04178	0.112636	0.71119	0.919676
GGB33469 SGB15236	Red meat ffq	-0.03282	0.088079	0.7099	0.919676
Bacteroides thetaiotaomicron	Red meat ffq	0.051501	0.131557	0.695999	0.919676
Blautia massiliensis	Red meat ffq	0.042465	0.10869	0.696562	0.919676
Anaerobutyricum hallii	Red meat ffq	0.034612	0.090415	0.702381	0.919676
Dorea formicigenerans	Red meat ffq	-0.02571	0.064097	0.6889	0.919676
Faecalicatena fissicatena	Olive oil ffq	-0.03085	0.103684	0.766412	0.919781
GGB6606 SGB9340	Red meat ffq	-0.03093	0.087712	0.724801	0.91981
Candidatus Cibionibacter quicibialis	Beer ffq	0.040753	0.112027	0.716522	0.91985
Collinsella aerofaciens	Eggs ffq	-0.03336	0.095136	0.726328	0.91997
Bifidobacterium pseudocatenulatum	Eggs ffq	0.0314	0.089863	0.727255	0.91997
Mediterraneibacter faecis	Eggs ffq	0.033688	0.09761	0.73046	0.91997
Blautia SGB4815	Eggs ffq	-0.03077	0.088512	0.728557	0.91997
Ruminococcus bromii	Eggs ffq	-0.05523	0.153324	0.719188	0.91997
Faecalibacterium prausnitzii	Eggs ffq	-0.03082	0.091075	0.735501	0.920026
GGB1420 SGB1957	Semi skimmed milk ffq	-0.03554	0.086673	0.682329	0.920117
Parasutterella excrementihominis	Semi skimmed milk ffq	0.044242	0.114648	0.70011	0.920117
GGB51647 SGB4348	Semi skimmed milk ffq	-0.05748	0.140537	0.68309	0.920117
GGB3486 SGB4658	Semi skimmed milk ffq	-0.02675	0.06903	0.698879	0.920117
Coprococcus catus	Vegetables ffq	-0.02149	0.064488	0.739396	0.920172
Blautia sp MCC283	Vegetables ffq	0.04378	0.133436	0.743262	0.920378
Akkermansia muciniphila	Pasta or rice ffq	-0.04422	0.126734	0.727658	0.920416
Parabacteroides distasonis	Spirits ffq	-0.02608	0.085176	0.759837	0.920627
GGB9635 SGB15106	Red meat ffq	-0.04093	0.118159	0.729507	0.92097
Clostridiaceae bacterium	Cold cuts ffq	-0.03345	0.081353	0.681502	0.920996
Bifidobacterium bifidum	Fish ffq	-0.03059	0.09042	0.735561	0.921131
Blautia glucerasea	Coffee ffq	-0.02769	0.094573	0.770067	0.921737
Ruminococcus bromii	Whole milk ffq	0.046721	0.152189	0.759266	0.922059
Brotolimicola acetigignens	Red meat ffq	0.043096	0.130882	0.742401	0.922491
Eubacterium ventriosum	Red meat ffq	-0.02514	0.075236	0.738744	0.922491
Parasutterella SGB9260	Red meat ffq	0.029849	0.089789	0.740021	0.922491
Parasutterella excrementihominis	Spirits ffq	0.033411	0.112045	0.765958	0.922517
Phocaeicola vulgatus	Eggs ffq	0.055823	0.167626	0.739566	0.922665
Alistipes onderdonkii	Eggs ffq	-0.04173	0.136172	0.759672	0.923091
Parabacteroides distasonis	Eggs ffq	0.02798	0.08758	0.749788	0.923091
Bacteroides thetaiotaomicron	Whole milk ffq	0.039461	0.130185	0.762219	0.923259
Bacteroides stercoris	Whole milk ffq	-0.04949	0.164923	0.764531	0.923288
GGB9715 SGB15265	Yogurt ffq	-0.04045	0.103494	0.696467	0.923405
Eubacterium siraeum	Red meat ffq	-0.03704	0.115631	0.749155	0.923469
Anaerobutyricum soehngenii	Red meat ffq	0.04136	0.129646	0.750149	0.923662
Simiaoa sunii	Whole milk ffq	0.040035	0.138062	0.772244	0.923975
Alistipes putredinis	Eggs ffq	0.049799	0.175526	0.777006	0.923993
Oscillospiraceae bacterium CLA AA H250	Eggs ffq	-0.02587	0.090804	0.776105	0.923993
Coprococcus eutactus	Eggs ffq	-0.0444	0.154959	0.77487	0.923993
Dialister invisus	Eggs ffq	-0.0296	0.104336	0.777011	0.923993
GGB33469 SGB15236	Semi skimmed milk ffq	0.030934	0.087432	0.72396	0.924118
Sutterella wadsworthensis	Coffee ffq	0.037077	0.131948	0.779092	0.924169
GGB3304 SGB4367	Cheese ffq	0.046725	0.108446	0.667189	0.924402
Faecalibacillus intestinalis	Semi skimmed milk ffq	-0.02794	0.086984	0.748467	0.924701
GGB9715 SGB15265	Semi skimmed milk ffq	0.033104	0.102984	0.74831	0.924701
Bacteroides fragilis	Semi skimmed milk ffq	0.038849	0.120435	0.747456	0.924701
Bilophila wadsworthia	Vegetables ffq	-0.02965	0.09948	0.766037	0.924816
Blautia faecis	Fish ffq	0.024687	0.076041	0.745886	0.924846
Faecalicatena fissicatena	Cheese ffq	-0.03936	0.093013	0.672785	0.924973
Bifidobacterium bifidum	Red meat ffq	-0.02838	0.090346	0.753865	0.925822
Clostridiaceae bacterium	Beer ffq	-0.02268	0.07906	0.774605	0.926436
Bacteroides cellulosilyticus	Beer ffq	0.039928	0.123834	0.747563	0.926436
Blautia massiliensis	Beer ffq	0.03	0.105315	0.776134	0.926436
Blautia glucerasea	Beer ffq	0.02494	0.089892	0.781809	0.926436
Roseburia inulinivorans	Beer ffq	-0.03321	0.112536	0.768324	0.926436
Bacteroides eggerthii	Yogurt ffq	0.052673	0.142783	0.712713	0.926946
Roseburia intestinalis	Yogurt ffq	-0.043	0.117185	0.714164	0.926946
Faecalibacterium prausnitzii	Wine ffq	0.03321	0.092528	0.720157	0.927115
Fusicatenibacter saccharivorans	Wine ffq	0.027016	0.083428	0.746516	0.927115
Bacteroides thetaiotaomicron	Wine ffq	0.048314	0.133336	0.717602	0.927115
Dysosmobacter welbionis	Wine ffq	0.02387	0.079965	0.765724	0.927115
Roseburia hominis	Wine ffq	-0.03847	0.113485	0.735111	0.927115
Akkermansia muciniphila	Wine ffq	-0.04383	0.127824	0.732147	0.927115
Ruminococcus lactaris	Wine ffq	-0.03519	0.098215	0.7206	0.927115
Blautia glucerasea	Wine ffq	-0.03333	0.093713	0.72257	0.927115
GGB4571 SGB6317	Wine ffq	0.040358	0.105635	0.702961	0.927115
Ruminococcus SGB4421	Wine ffq	-0.03341	0.102598	0.745113	0.927115
Bacteroides clarus	Wine ffq	0.039799	0.103904	0.702224	0.927115
Bifidobacterium adolescentis	Olive oil ffq	-0.04072	0.148584	0.784384	0.927228
Blautia faecis	Eggs ffq	0.020007	0.075956	0.792594	0.927531
Alistipes ihumii	Butter ffq	0.020556	0.079828	0.797148	0.92764
Anaerostipes hadrus	Butter ffq	0.016599	0.064284	0.796589	0.92764
Acidaminococcus intestini	Butter ffq	0.023884	0.088231	0.786996	0.92764
Faecalibacterium sp HTFF	Butter ffq	0.025854	0.096902	0.789981	0.92764
Roseburia intestinalis	Butter ffq	0.030155	0.114812	0.793185	0.92764
Bacteroides eggerthii	Semi skimmed milk ffq	0.042612	0.141634	0.763929	0.927721
Brotolimicola acetigignens	Cold cuts ffq	-0.05202	0.131438	0.692846	0.928164
Phascolarctobacterium faecium	Bread ffq	-0.03824	0.110698	0.730264	0.928179
Ruminococcus callidus	Yogurt ffq	-0.02984	0.090499	0.742029	0.928192
Ruminococcus bicirculans	Yogurt ffq	-0.0466	0.141169	0.741802	0.928192
Faecalibacillus intestinalis	Yogurt ffq	0.029823	0.087151	0.732681	0.928192
Phocaeicola massiliensis	Yogurt ffq	0.051563	0.150308	0.732034	0.928192
Dialister invisus	Pasta or rice ffq	-0.03322	0.104921	0.751995	0.928357
Phocaeicola dorei	Coffee ffq	0.048201	0.180434	0.789721	0.928471
Alistipes shahii	Coffee ffq	-0.02816	0.106485	0.791758	0.928471
Bacteroides stercoris	Cold cuts ffq	0.061384	0.169159	0.717201	0.928767
Ruminococcus SGB4421	Beer ffq	0.02583	0.098069	0.792607	0.929082
Acidaminococcus intestini	Cold cuts ffq	0.030963	0.090851	0.73372	0.929578
Clostridium sp AM22 11AC	Fruit ffq	0.029808	0.09096	0.743589	0.929804
Bacteroides caccae	Eggs ffq	-0.02667	0.106625	0.802799	0.930542
Roseburia inulinivorans	Eggs ffq	-0.02918	0.115321	0.800609	0.930542
Bacteroides faecis	Eggs ffq	-0.02867	0.114829	0.803205	0.930542
Simiaoa sunii	Red meat ffq	-0.04052	0.139712	0.772215	0.930601
Dorea longicatena	Fruit ffq	0.035077	0.110492	0.751335	0.931392
Oscillospiraceae bacterium CLA AA H250	Fruit ffq	0.029384	0.095973	0.759912	0.931392
Bifidobacterium pseudocatenulatum	Fruit ffq	-0.02901	0.095102	0.760799	0.931392
Ruminococcus gnavus	Fruit ffq	0.031913	0.103469	0.758179	0.931392
GGB3345 SGB4425	Fruit ffq	-0.02915	0.090824	0.748722	0.931392
Faecalibacterium prausnitzii	Butter ffq	-0.02171	0.089357	0.808348	0.931541
Candidatus Cibionibacter quicibialis	Spirits ffq	-0.0303	0.1122	0.78748	0.931556
Clostridium sp AF36 4	Bread ffq	0.037711	0.113149	0.739381	0.931645
Bacteroides caccae	Bread ffq	-0.03533	0.107137	0.742047	0.931645
GGB9699 SGB15216	Bread ffq	-0.02782	0.084772	0.743236	0.931645
GGB3175 SGB4191	Cold cuts ffq	0.035484	0.106306	0.739002	0.931813
Bacteroides fragilis	Butter ffq	0.027323	0.118221	0.817537	0.932162
Coprococcus eutactus	Olive oil ffq	0.043508	0.168126	0.796125	0.932753
Bacteroides eggerthii	Bread ffq	0.045473	0.143484	0.751737	0.932919
Anaerostipes hadrus	White meat ffq	0.020086	0.066954	0.764589	0.932942
Streptococcus salivarius	White meat ffq	-0.03278	0.107685	0.761244	0.932942
Eubacterium ventriosum	White meat ffq	-0.02297	0.076115	0.763203	0.932942
Oscillospiraceae bacterium CLA AA H250	White meat ffq	-0.02723	0.09237	0.768585	0.932942
GGB1420 SGB1957	Coffee ffq	0.022282	0.089312	0.80332	0.933143
Faecalicatena fissicatena	Coffee ffq	0.024338	0.096923	0.802067	0.933143
Oscillibacter valericigenes	White meat ffq	0.027615	0.098152	0.778829	0.933156
Ruminococcus bromii	Fruit ffq	0.048515	0.162759	0.766053	0.933231
Agathobaculum butyriciproducens	Cold cuts ffq	-0.02166	0.0654	0.740915	0.933309
Faecalicatena fissicatena	Cold cuts ffq	-0.03121	0.09551	0.744316	0.933317
Roseburia inulinivorans	Semi skimmed milk ffq	-0.03333	0.114663	0.771667	0.933648
GGB1420 SGB1957	Pasta or rice ffq	0.02641	0.087687	0.763688	0.933774
GGB3345 SGB4425	Pasta or rice ffq	-0.02563	0.086245	0.766766	0.933774
Lachnospira eligens	Butter ffq	-0.02702	0.122017	0.825047	0.933866
Oscillibacter valericigenes	Red meat ffq	0.027513	0.096713	0.776415	0.93387
Sutterella wadsworthensis	Bread ffq	-0.0354	0.129469	0.784867	0.933926
Bifidobacterium longum	Bread ffq	0.029767	0.103061	0.773108	0.933926
Oscillospiraceae bacterium	Bread ffq	-0.03117	0.102999	0.762608	0.933926
Lacrimispora amygdalina	Bread ffq	-0.02338	0.085172	0.784078	0.933926
Bilophila wadsworthia	Bread ffq	-0.02858	0.094049	0.761615	0.933926
Blautia wexlerae	Bread ffq	0.022813	0.075972	0.764375	0.933926
Dialister invisus	Bread ffq	-0.02883	0.104664	0.783363	0.933926
GGB9635 SGB15106	Bread ffq	0.034561	0.118743	0.771415	0.933926
Faecalibacterium SGB15346	Vegetables ffq	0.031587	0.115118	0.784144	0.934637
Sutterella wadsworthensis	Yogurt ffq	-0.038	0.128852	0.768448	0.934686
GGB9602 SGB15031	Yogurt ffq	-0.03056	0.102297	0.765578	0.934686
Phascolarctobacterium faecium	Fruit ffq	0.03061	0.116843	0.793695	0.934887
Roseburia faecis	Fruit ffq	-0.04186	0.159583	0.793463	0.934887
Ruminococcus lactaris	Fruit ffq	0.028182	0.1025	0.783732	0.934887
Bacteroides eggerthii	Fruit ffq	0.039717	0.15125	0.79322	0.934887
Lachnospira eligens	Pasta or rice ffq	0.035613	0.125348	0.776717	0.935254
Flavonifractor plautii	Pasta or rice ffq	0.030757	0.109678	0.779532	0.935439
GGB1420 SGB1957	Spirits ffq	-0.02171	0.084734	0.798089	0.935508
Anaerostipes hadrus	Spirits ffq	0.015536	0.064014	0.808558	0.935894
Bacteroides stercoris	Cheese ffq	-0.06216	0.164307	0.705706	0.935994
Bifidobacterium adolescentis	Cheese ffq	0.049292	0.134174	0.713852	0.935994
Bifidobacterium longum	Cheese ffq	-0.03992	0.100933	0.693048	0.935994
Alistipes communis	Cheese ffq	0.032072	0.091365	0.726044	0.935994
Bacteroides caccae	Cheese ffq	-0.03293	0.104866	0.753949	0.935994
Dorea longicatena	Cheese ffq	-0.03852	0.102442	0.70747	0.935994
Mediterraneibacter faecis	Cheese ffq	0.033582	0.096012	0.726988	0.935994
Blautia SGB4815	Cheese ffq	-0.02718	0.087012	0.755175	0.935994
Clostridium sp AM22 11AC	Cheese ffq	-0.03123	0.084409	0.711895	0.935994
Coprococcus comes	Cheese ffq	0.027205	0.081964	0.740419	0.935994
GGB4552 SGB6276	Cheese ffq	0.033069	0.086825	0.703832	0.935994
Bifidobacterium adolescentis	Cold cuts ffq	-0.04142	0.137903	0.76434	0.93625
GGB9715 SGB15265	Cheese ffq	0.031603	0.101784	0.756612	0.936335
Wujia chipingensis	Cheese ffq	0.025522	0.082609	0.757796	0.936335
GGB3345 SGB4425	Eggs ffq	-0.01953	0.085735	0.820138	0.936421
GGB6606 SGB9340	Cheese ffq	0.026448	0.085951	0.75871	0.936467
Bacteroides stercoris	Wine ffq	0.047269	0.16964	0.780897	0.93648
GGB3345 SGB4425	Wine ffq	-0.02423	0.08704	0.781062	0.93648
Gemmiger formicilis	Yogurt ffq	0.029782	0.109264	0.78555	0.936522
Ruminococcus bicirculans	Semi skimmed milk ffq	0.039439	0.140969	0.780037	0.936697
GGB3304 SGB4367	White meat ffq	-0.02998	0.112665	0.790505	0.936869
Dysosmobacter welbionis	Cheese ffq	0.023509	0.077491	0.762015	0.937261
GGB9635 SGB15106	Cheese ffq	0.035281	0.116112	0.761662	0.937261
GGB9602 SGB15031	Beer ffq	-0.02364	0.099583	0.812657	0.937268
Bacteroides ovatus	Pasta or rice ffq	0.035984	0.131763	0.78515	0.937413
Alistipes shahii	Pasta or rice ffq	-0.02807	0.104563	0.788713	0.93748
GGB47687 SGB2286	Cheese ffq	0.030372	0.100767	0.76352	0.937504
Clostridium sp AM22 11AC	Pasta or rice ffq	-0.02289	0.08639	0.791429	0.937793
Alistipes onderdonkii	Coffee ffq	-0.03249	0.139868	0.816609	0.937809
GGB4571 SGB6317	White meat ffq	0.027141	0.10619	0.798619	0.9379
Parasutterella SGB9260	Butter ffq	0.018547	0.08785	0.833078	0.938456
GGB4571 SGB6317	Whole milk ffq	0.02369	0.103147	0.818657	0.938546
GGB1420 SGB1957	Red meat ffq	0.024157	0.087362	0.782525	0.938619
Blautia wexlerae	Spirits ffq	0.016727	0.073657	0.82065	0.938643
Barnesiella intestinihominis	Eggs ffq	-0.02333	0.115587	0.840297	0.938881
Parasutterella SGB9260	Vegetables ffq	0.02337	0.094747	0.80549	0.939011
Oscillibacter sp ER4	Wine ffq	0.031843	0.117295	0.78639	0.93914
Parasutterella excrementihominis	Whole milk ffq	0.025812	0.114277	0.821602	0.939265
Lachnospira sp NSJ 43	White meat ffq	-0.0215	0.087207	0.805603	0.939409
Bifidobacterium longum	Pasta or rice ffq	0.026027	0.103339	0.801491	0.939558
Bacteroides eggerthii	Pasta or rice ffq	0.036663	0.143617	0.79885	0.939558
Bacteroides cellulosilyticus	Eggs ffq	0.02518	0.127494	0.843694	0.939945
GGB9715 SGB15265	Beer ffq	0.022364	0.10053	0.824248	0.940156
Lachnospira eligens	Semi skimmed milk ffq	0.033287	0.124035	0.788785	0.940762
Roseburia intestinalis	Semi skimmed milk ffq	-0.03046	0.117189	0.795273	0.941561
Oscillibacter sp ER4	Bread ffq	0.027599	0.115946	0.812179	0.941629
Bifidobacterium pseudocatenulatum	Bread ffq	-0.02182	0.090066	0.808942	0.941629
Mediterraneibacter faecis	Bread ffq	-0.0234	0.098096	0.811763	0.941629
Clostridium sp AM22 11AC	Yogurt ffq	0.02152	0.085779	0.802251	0.942643
GGB9699 SGB15216	Olive oil ffq	-0.02078	0.093593	0.824537	0.942757
Lacrimispora amygdalina	Yogurt ffq	0.020927	0.084916	0.805687	0.942854
Oscillibacter valericigenes	Coffee ffq	0.020687	0.098634	0.834156	0.942906
Bacteroides clarus	Coffee ffq	-0.02269	0.104903	0.829044	0.942906
GGB3345 SGB4425	Coffee ffq	0.018264	0.087842	0.83557	0.942906
GGB3486 SGB4658	Vegetables ffq	-0.01732	0.073967	0.815128	0.942992
GGB9699 SGB15216	Cheese ffq	-0.02302	0.08322	0.782423	0.943421
GGB33469 SGB15236	Fruit ffq	0.021478	0.093131	0.817917	0.943566
Agathobaculum butyriciproducens	Red meat ffq	-0.01642	0.065394	0.802086	0.943577
Ruminococcus gnavus	Red meat ffq	-0.02538	0.098201	0.796409	0.943577
Alistipes putredinis	Fruit ffq	0.040369	0.187311	0.829648	0.943599
Blautia massiliensis	Bread ffq	-0.02371	0.10896	0.828016	0.943644
Eubacterium siraeum	Bread ffq	-0.02502	0.115372	0.828637	0.943644
Faecalibacterium SGB15346	Red meat ffq	-0.02698	0.109523	0.805778	0.94374
Bacteroides stercoris	Coffee ffq	0.034178	0.171264	0.842088	0.943909
Wujia chipingensis	Coffee ffq	-0.01723	0.086036	0.841564	0.943909
Clostridium sp AM49 4BH	Fish ffq	0.024477	0.097129	0.80139	0.943969
GGB51647 SGB4348	Fish ffq	-0.0358	0.141713	0.800902	0.943969
GGB47687 SGB2286	Fish ffq	-0.02606	0.102804	0.800223	0.943969
Phascolarctobacterium faecium	Red meat ffq	-0.02549	0.110382	0.817667	0.944229
Blautia obeum	Red meat ffq	0.022555	0.106104	0.831945	0.944229
Bacteroides clarus	Red meat ffq	0.021974	0.102463	0.830475	0.944229
Eubacterium ventriosum	Olive oil ffq	0.0164	0.083061	0.843724	0.944329
Sutterella wadsworthensis	Vegetables ffq	-0.02991	0.133592	0.823099	0.944364
GGB6606 SGB9340	Yogurt ffq	-0.02106	0.087338	0.809751	0.945011
Bifidobacterium adolescentis	Yogurt ffq	-0.03253	0.136467	0.811938	0.945101
GGB4571 SGB6317	Butter ffq	0.017435	0.102039	0.864556	0.945337
Mediterraneibacter faecis	Olive oil ffq	0.020093	0.106252	0.850233	0.945377
Sutterella wadsworthensis	Fish ffq	0.031041	0.129234	0.810501	0.945609
Fusicatenibacter saccharivorans	Fish ffq	-0.01948	0.082387	0.813373	0.945609
Eubacterium ventriosum	Fish ffq	-0.01604	0.074894	0.830752	0.945609
Parasutterella excrementihominis	Fish ffq	-0.02634	0.115681	0.820187	0.945609
Ruminococcus SGB4421	Fish ffq	-0.02272	0.101363	0.82298	0.945609
Ruminococcus callidus	Whole milk ffq	0.018972	0.089758	0.832874	0.945749
Oscillospiraceae bacterium	Cold cuts ffq	0.027805	0.10368	0.788929	0.945914
GGB33469 SGB15236	Bread ffq	0.018309	0.088214	0.835853	0.946098
Phocaeicola vulgatus	Spirits ffq	0.034945	0.163753	0.831297	0.946302
Oscillospiraceae bacterium CLA AA H250	Red meat ffq	0.018774	0.09101	0.836848	0.946467
Sutterella wadsworthensis	Cold cuts ffq	-0.03406	0.130276	0.79411	0.946515
Coprococcus comes	Cold cuts ffq	0.02223	0.08421	0.792154	0.946515
Ruminococcus SGB4421	Semi skimmed milk ffq	0.024957	0.100484	0.804182	0.946561
Simiaoa sunii	Butter ffq	-0.02279	0.136196	0.867353	0.946684
Odoribacter splanchnicus	Pasta or rice ffq	0.01655	0.07158	0.817465	0.946704
Faecalibacterium sp HTFF	Coffee ffq	0.018648	0.101261	0.854129	0.946888
Dysosmobacter welbionis	Yogurt ffq	0.018172	0.078661	0.81761	0.947411
Faecalibacterium prausnitzii	Cold cuts ffq	-0.02199	0.092038	0.811527	0.947539
Streptococcus salivarius	Cold cuts ffq	0.024035	0.106651	0.822	0.947843
Oscillibacter sp MSJ 31	Beer ffq	0.020539	0.105022	0.84521	0.948245
Phocaeicola massiliensis	Beer ffq	0.029162	0.145359	0.841259	0.948245
Alistipes onderdonkii	Fish ffq	-0.02749	0.136912	0.841114	0.948262
Alistipes onderdonkii	Red meat ffq	-0.02753	0.136683	0.840664	0.94851
Phocaeicola dorei	Spirits ffq	0.034298	0.17104	0.841335	0.948512
GGB9342 SGB14306	Butter ffq	0.017241	0.109075	0.874615	0.9489
GGB9708 SGB15234	Cold cuts ffq	-0.02514	0.113927	0.825669	0.948983
Anaerostipes hadrus	Bread ffq	-0.01333	0.065826	0.839744	0.948984
GGB9758 SGB15368	Semi skimmed milk ffq	0.031929	0.13775	0.817017	0.949083
Bacteroides stercoris	Semi skimmed milk ffq	0.037445	0.165937	0.821767	0.949193
Roseburia hominis	Yogurt ffq	-0.02496	0.111604	0.82333	0.949378
Dorea formicigenerans	Spirits ffq	-0.01188	0.062133	0.848611	0.949907
Agathobaculum butyriciproducens	Semi skimmed milk ffq	-0.01426	0.064825	0.826213	0.950016
Anaerobutyricum soehngenii	Coffee ffq	0.021887	0.132452	0.868971	0.950165
GGB6606 SGB9340	White meat ffq	-0.01839	0.08916	0.836825	0.950292
Bacteroides caccae	White meat ffq	0.02254	0.108901	0.836304	0.950292
Lacrimispora amygdalina	White meat ffq	-0.01774	0.086727	0.838252	0.950332
Bacteroides finegoldii	Semi skimmed milk ffq	-0.01916	0.091032	0.833602	0.950386
GGB3304 SGB4367	Wine ffq	0.027288	0.112125	0.808046	0.951209
Parasutterella excrementihominis	Pasta or rice ffq	0.025147	0.11604	0.828723	0.951542
Oscillospiraceae bacterium CLA AA H250	Cold cuts ffq	-0.01927	0.09144	0.833391	0.951548
Coprococcus eutactus	Wine ffq	-0.0369	0.157701	0.815295	0.951765
Clostridium sp AM49 4BH	Pasta or rice ffq	0.01975	0.09758	0.839888	0.953017
Eubacterium rectale	Eggs ffq	0.023096	0.139504	0.86872	0.953207
Clostridium fessum	Eggs ffq	-0.01223	0.07447	0.869734	0.953207
Agathobaculum butyriciproducens	Bread ffq	-0.01205	0.064901	0.852922	0.953243
Bacteroides xylanisolvens	Wine ffq	-0.02492	0.12221	0.838707	0.953265
Faecalicatena fissicatena	Wine ffq	0.020849	0.096069	0.828486	0.953265
GGB4552 SGB6276	Wine ffq	0.018834	0.089625	0.833842	0.953265
Clostridium fessum	Semi skimmed milk ffq	0.014933	0.074061	0.840477	0.95331
Faecalicatena fissicatena	Semi skimmed milk ffq	0.018534	0.094186	0.844255	0.953506
GGB4571 SGB6317	Cheese ffq	0.02473	0.102292	0.809294	0.95362
Streptococcus salivarius	Olive oil ffq	0.018293	0.118023	0.877022	0.953742
Fusicatenibacter saccharivorans	Cheese ffq	-0.0181	0.080849	0.823193	0.95388
Akkermansia muciniphila	Cheese ffq	0.028174	0.123887	0.820415	0.95388
Bifidobacterium bifidum	Coffee ffq	0.014539	0.092415	0.875199	0.954027
Faecalibacterium SGB15346	Yogurt ffq	0.022596	0.109311	0.836512	0.954344
Faecalicatena fissicatena	Yogurt ffq	0.018797	0.094534	0.842658	0.954344
Eubacterium siraeum	Cheese ffq	0.0241	0.1132	0.831691	0.954643
Streptococcus thermophilus	Fish ffq	-0.01635	0.087916	0.852721	0.954838
Collinsella aerofaciens	Red meat ffq	-0.01691	0.095434	0.859615	0.95514
Parasutterella excrementihominis	Olive oil ffq	-0.01821	0.124954	0.884306	0.95586
GGB3486 SGB4658	Yogurt ffq	-0.01332	0.068868	0.846912	0.956527
Phocaeicola dorei	Bread ffq	-0.03077	0.177088	0.862297	0.956906
Parasutterella excrementihominis	Yogurt ffq	0.022007	0.115306	0.848891	0.956936
Anaerostipes hadrus	Coffee ffq	0.0098	0.067309	0.884435	0.957321
Alistipes ihumii	Fish ffq	-0.01408	0.081801	0.863559	0.957537
Anaerobutyricum soehngenii	Wine ffq	-0.02463	0.131276	0.851433	0.957608
Oscillibacter valericigenes	Wine ffq	-0.01699	0.097758	0.86228	0.957638
Flavonifractor plautii	Wine ffq	0.019462	0.110617	0.860575	0.957638
GGB9602 SGB15031	Wine ffq	0.018205	0.103972	0.861244	0.957638
Oscillibacter sp MSJ 31	Red meat ffq	-0.01835	0.108422	0.865794	0.957784
GGB4571 SGB6317	Fruit ffq	-0.02008	0.110277	0.855772	0.957901
Parabacteroides merdae	Bread ffq	-0.01959	0.114657	0.86457	0.957927
Odoribacter splanchnicus	Yogurt ffq	-0.01262	0.071062	0.859327	0.958687
Faecalibacterium prausnitzii	Whole milk ffq	0.014965	0.090311	0.868606	0.958824
Clostridiales bacterium KLE1615	Whole milk ffq	-0.01259	0.079254	0.874008	0.958824
Ruminococcus SGB4421	Whole milk ffq	-0.01686	0.100153	0.866507	0.958824
Bacteroides clarus	Whole milk ffq	0.017552	0.101311	0.862686	0.958824
Blautia massiliensis	Butter ffq	0.014297	0.10643	0.893322	0.959018
Blautia wexlerae	Yogurt ffq	-0.01288	0.07568	0.865064	0.959226
GGB3345 SGB4425	Spirits ffq	-0.01205	0.08336	0.885267	0.959306
Dorea longicatena	Fish ffq	0.017155	0.104567	0.869908	0.959572
Lachnospira eligens	White meat ffq	0.02168	0.127069	0.864762	0.959642
Collinsella aerofaciens	Wine ffq	0.016484	0.096643	0.864797	0.959681
Alistipes communis	Wine ffq	0.015941	0.09439	0.866115	0.959862
Bacteroides xylanisolvens	Cheese ffq	-0.02182	0.118356	0.853987	0.960076
Bacteroides thetaiotaomicron	Cheese ffq	-0.02469	0.129133	0.848623	0.960076
Roseburia faecis	Cheese ffq	0.026471	0.148091	0.858373	0.960076
Phascolarctobacterium faecium	Coffee ffq	-0.01512	0.112963	0.893687	0.960137
Bacteroides uniformis	Cheese ffq	0.0174	0.098993	0.860709	0.960145
Faecalibacterium sp HTFF	Cheese ffq	-0.01702	0.097155	0.861147	0.960145
Ruminococcus gnavus	Pasta or rice ffq	-0.01777	0.098349	0.856829	0.960255
Dialister invisus	Beer ffq	-0.01676	0.101375	0.868883	0.960585
Simiaoa sunii	Pasta or rice ffq	-0.02364	0.140057	0.866179	0.961214
Dorea formicigenerans	Pasta or rice ffq	0.011405	0.064254	0.859357	0.961214
Ruminococcus bromii	Pasta or rice ffq	-0.02648	0.154538	0.864199	0.961214
Brotolimicola acetigignens	Semi skimmed milk ffq	-0.02189	0.129902	0.866413	0.961553
Odoribacter splanchnicus	Semi skimmed milk ffq	0.012109	0.07084	0.864499	0.961553
Anaerobutyricum hallii	Semi skimmed milk ffq	0.015681	0.089765	0.861552	0.961553
Blautia SGB4815	Semi skimmed milk ffq	0.015073	0.088096	0.864373	0.961553
Coprococcus comes	Semi skimmed milk ffq	0.013946	0.082981	0.86676	0.961553
Bifidobacterium longum	Beer ffq	0.01584	0.099873	0.874191	0.961769
Faecalibacillus intestinalis	Beer ffq	-0.01306	0.085083	0.878226	0.961769
Coprococcus catus	Fish ffq	-0.00964	0.060765	0.874219	0.962031
Barnesiella intestinihominis	White meat ffq	-0.01907	0.118537	0.872433	0.962122
Alistipes onderdonkii	Yogurt ffq	0.022337	0.136491	0.870221	0.962329
GGB47687 SGB2286	Vegetables ffq	0.017114	0.108625	0.875011	0.962344
Acidaminococcus intestini	Cheese ffq	-0.01471	0.088382	0.868074	0.962563
Flavonifractor plautii	Cheese ffq	-0.01799	0.107166	0.866876	0.962563
Parasutterella SGB9260	Whole milk ffq	-0.01229	0.088857	0.890194	0.962957
Faecalibacterium SGB15346	Pasta or rice ffq	0.017853	0.110018	0.871311	0.963136
Ruminococcus bromii	Cold cuts ffq	-0.02832	0.155191	0.855472	0.963516
Coprococcus comes	Bread ffq	-0.01289	0.083711	0.87787	0.963616
Blautia sp MCC283	Red meat ffq	-0.0205	0.126837	0.871793	0.963668
Anaerobutyricum hallii	Coffee ffq	-0.01135	0.092389	0.902427	0.963678
Ruminococcus callidus	Cold cuts ffq	0.015909	0.091471	0.862156	0.963727
Clostridium fessum	Butter ffq	-0.00898	0.072889	0.902155	0.963792
Parabacteroides merdae	Yogurt ffq	0.017471	0.114109	0.878519	0.96393
Agathobaculum butyriciproducens	Olive oil ffq	0.00914	0.072243	0.899487	0.96395
Dorea formicigenerans	Coffee ffq	0.007745	0.065393	0.905883	0.964293
Blautia SGB4815	Cold cuts ffq	-0.01467	0.089392	0.869859	0.964542
Mediterraneibacter faecis	Red meat ffq	-0.01519	0.0979	0.876883	0.964557
Bacteroides finegoldii	Red meat ffq	0.014152	0.091727	0.877587	0.964557
Ruminococcus bicirculans	Vegetables ffq	-0.02156	0.150702	0.88644	0.964629
GGB33469 SGB15236	Vegetables ffq	0.013569	0.093053	0.884243	0.964629
Ruminococcus bicirculans	Cold cuts ffq	0.02229	0.142688	0.876076	0.964637
Ruminococcus bicirculans	Fruit ffq	-0.02442	0.149836	0.870744	0.964901
Oscillibacter sp MSJ 31	Fruit ffq	-0.01854	0.114684	0.871767	0.965146
[truncated: 245 more rows]

## Sheet: Table S7
Supplementary Table 7: Associations between habitual food intake and gut microbial pathways abundance.
Associations between habitual food intake frequencies derived from food frequency questionnaires (FFQs) and gut microbial pathways abundance were assessed using linear mixed-effects models. Analyses were restricted to pathways with a prevalence ≥20% and relative abundance ≥0.1%. Models were adjusted for DNA concentration, sequencing depth, age, BMI, Bristol stool scale, center, batch, timing of s…
Pathways	Food habits from FFQ	Beta	Standard error	P-value	Q-value
PWY-2941 L-lysine biosynthesis II	Fruit	-0.10811	0.030653	0.000559	0.007175
GLUCUROCAT-PWY Superpathway of β-D-glucuronoside degradation	Olive oil	0.10593	0.032058	0.001179	0.013991
PWY-7198 Pyrimidine deoxyribonucleotides de novo biosynthesis IV	Semi skimmed milk	0.119732	0.036609	0.001333	0.015904
PWY-6147 6-hydroxymethyl-dihydropterin diphosphate biosynthesis I	Eggs	0.093799	0.031437	0.003322	0.037056
PWY-5103 L-isoleucine biosynthesis III	Spirits	0.067051	0.022551	0.00343	0.037956
PWY-7242 D-fructuronate degradation	Olive oil	0.101231	0.034554	0.003896	0.041683
PWY-7117 C4 photosynthetic carbon assimilation cycle (PEPCK type)	Semi skimmed milk	0.185432	0.064353	0.004525	0.047607
PWY-1269 CMP-3-deoxy-D-manno-octulosonate biosynthesis	Olive oil	0.113592	0.039568	0.004651	0.048701
PWY-621 Sucrose degradation III (sucrose invertase)	Eggs	0.087661	0.030479	0.004602	0.049354
GLUCOSE1PMETAB-PWY Glucose and glucose-1-phosphate degradation	Eggs	0.122126	0.042867	0.004984	0.052686
PWY0-162 Superpathway of pyrimidine ribonucleotides de novo biosynthesis	Fruit	-0.08871	0.031164	0.005045	0.053849
ILEUSYN-PWY L-isoleucine biosynthesis I (from threonine)	Spirits	0.059933	0.021222	0.005379	0.056595
BRANCHED-CHAIN-AA-SYN-PWY Superpathway of branched-chain amino acid biosynthesis	Spirits	0.058772	0.020833	0.005428	0.056835
DAPLYSINESYN-PWY L-lysine biosynthesis I	Semi skimmed milk	0.1526	0.054597	0.005851	0.059888
PWY-5384 Sucrose degradation IV (sucrose phosphorylase)	Eggs	0.080253	0.029237	0.006777	0.069652
PWY-7237 Myo-, chiro-, and scyllo-inositol degradation	Eggs	0.080565	0.029407	0.006889	0.070269
GLYCOLYSIS-PWY Glycolysis I (from glucose-6-phosphate)	Wine	-0.07222	0.026372	0.006967	0.072614
PWY-1042 Glycolysis IV	Spirits	0.055034	0.020211	0.007231	0.072963
PWY4FS-7 Phosphatidylglycerol biosynthesis I (plastidic)	Olive oil	0.09026	0.033353	0.007547	0.073016
PWY4FS-8 Phosphatidylglycerol biosynthesis II (non-plastidic)	Olive oil	0.09026	0.033353	0.007547	0.073016
THISYNARA-PWY Superpathway of thiamine diphosphate biosynthesis III (eukaryotes)	Olive oil	0.07673	0.028368	0.007565	0.073016
PWY-7357 Thiamine phosphate formation from pyrithiamine and oxythiamine (yeast)	Spirits	0.060104	0.022202	0.007555	0.075887
PWY-5154 L-arginine biosynthesis III (via N-acetyl-L-citrulline)	Olive oil	0.078369	0.029445	0.008572	0.081326
PWY-5484 Glycolysis II (from fructose-6-phosphate)	Wine	-0.07118	0.026665	0.008483	0.086136
PWY0-1586 Peptidoglycan maturation (meso-diaminopimelate containing)	Eggs	0.057881	0.02193	0.009173	0.089313
PWY-7560 Methylerythritol phosphate pathway II	Spirits	0.059038	0.022449	0.009431	0.091828
PWY-6317 D-galactose degradation I (Leloir pathway)	Spirits	0.056605	0.021555	0.009492	0.091981
PWY-6936 Seleno-amino acid biosynthesis (plants)	Spirits	0.08181	0.031391	0.010066	0.096317
PWY-6897 Thiamine diphosphate salvage II	Eggs	0.055817	0.021624	0.010797	0.102877
PWY4FS-7 Phosphatidylglycerol biosynthesis I (plastidic)	Eggs	0.07747	0.030164	0.011184	0.104324
PWY4FS-8 Phosphatidylglycerol biosynthesis II (non-plastidic)	Eggs	0.07747	0.030164	0.011184	0.104324
PWY-5154 L-arginine biosynthesis III (via N-acetyl-L-citrulline)	Eggs	0.068104	0.02658	0.01137	0.105616
PWY-5989 Stearate biosynthesis II (bacteria and plants)	Whole milk	-0.11698	0.045415	0.010957	0.108167
PWY-5188 Tetrapyrrole biosynthesis I (from glutamate)	White meat	-0.07706	0.030024	0.011257	0.108652
PWY-7229 Superpathway of adenosine nucleotides de novo biosynthesis I	Semi skimmed milk	0.05121	0.020125	0.01197	0.109809
PWY-841 Superpathway of purine nucleotides de novo biosynthesis I	Semi skimmed milk	0.048785	0.019224	0.01219	0.111369
PWY-6897 Thiamine diphosphate salvage II	Olive oil	0.061068	0.024059	0.012104	0.111963
PWY-7977 L-methionine biosynthesis IV	Spirits	0.050878	0.020135	0.012537	0.114064
PWY0-862 5Z-dodecenoate biosynthesis I	Whole milk	-0.11849	0.046498	0.011823	0.114259
PWY0-862 5Z-dodecenoate biosynthesis I	Fish	0.119228	0.046881	0.012003	0.114858
PWY0-1061 Superpathway of L-alanine biosynthesis	Fruit	-0.16836	0.066498	0.012369	0.120967
HISDEG-PWY L-histidine degradation I	Red meat	0.091446	0.036401	0.013047	0.121703
CALVIN-PWY Calvin–Benson–Bassham cycle	Spirits	0.050606	0.020344	0.013926	0.125162
GLUCONEO-PWY Gluconeogenesis I	Spirits	0.072073	0.029008	0.014039	0.125673
PWY-6897 Thiamine diphosphate salvage II	Spirits	0.052361	0.021103	0.014181	0.126431
NAGLIPASYN-PWY Lipid IVA biosynthesis (E. coli)	Yogurt	0.125216	0.050461	0.014201	0.12974
PWY-8073 Lipid IVA biosynthesis (P. putida)	Yogurt	0.125216	0.050461	0.014201	0.12974
PWY-5100 Pyruvate fermentation to acetate and lactate II	Spirits	0.070125	0.028466	0.014846	0.130265
THISYN-PWY Superpathway of thiamine diphosphate biosynthesis I	Olive oil	0.062945	0.025817	0.015898	0.133684
ANAGLYCOLYSIS-PWY Glycolysis III (from glucose)	Spirits	0.043424	0.017796	0.015819	0.137013
PWY-6122 5-aminoimidazole ribonucleotide biosynthesis II	Spirits	0.047326	0.019477	0.016269	0.139447
PWY-6277 Superpathway of 5-aminoimidazole ribonucleotide biosynthesis	Spirits	0.047326	0.019477	0.016269	0.139447
PWY-4041 γ-glutamyl cycle	Wine	-0.09482	0.038603	0.015194	0.139961
PWY-7220 Adenosine deoxyribonucleotides de novo biosynthesis II	Red meat	0.071187	0.029185	0.015871	0.142067
PWY-7222 Guanosine deoxyribonucleotides de novo biosynthesis II	Red meat	0.071187	0.029185	0.015871	0.142067
PWY-4041 γ-glutamyl cycle	Red meat	-0.09283	0.038427	0.01687	0.146293
RIBOSYN2-PWY Flavin biosynthesis I (bacteria and plants)	Semi skimmed milk	0.042814	0.017789	0.017324	0.149069
PWY-6282 Palmitoleate biosynthesis I (from 5Z-dodec-5-enoate)	Whole milk	-0.11231	0.046359	0.016594	0.149733
PWY-6527 Stachyose degradation	Spirits	0.0661	0.027687	0.018164	0.152164
PWY-7221 Guanosine ribonucleotides de novo biosynthesis	Spirits	0.050932	0.021353	0.01831	0.15281
PWY-6147 6-hydroxymethyl-dihydropterin diphosphate biosynthesis I	Olive oil	0.083417	0.035205	0.019015	0.154065
ANAEROFRUCAT-PWY Homolactic fermentation	Wine	-0.0558	0.023134	0.017163	0.154263
PWY-7664 Oleate biosynthesis IV (anaerobic)	Whole milk	-0.10927	0.045409	0.017328	0.155115
RIBOSYN2-PWY Flavin biosynthesis I (bacteria and plants)	Olive oil	0.046796	0.019883	0.019862	0.159182
PWY-7345 Superpathway of anaerobic sucrose degradation	Semi skimmed milk	0.060215	0.025361	0.01883	0.160093
PWY-724 Superpathway of L-lysine, L-threonine, and L-methionine biosynthesis II	Semi skimmed milk	0.040273	0.017016	0.01923	0.162129
PWY-6125 Superpathway of guanosine nucleotides de novo biosynthesis II	Red meat	0.060807	0.025733	0.019398	0.163743
PWY-8178 Pentose phosphate pathway, non-oxidative branch II	Spirits	0.054578	0.023358	0.020729	0.164939
FASYN-ELONG-PWY Fatty acid elongation (saturated)	Whole milk	-0.10558	0.044442	0.01877	0.165358
PWY-7560 Methylerythritol phosphate pathway II	Eggs	0.054323	0.023183	0.020441	0.168387
PWY-6123 Inosine-5′-phosphate biosynthesis I	Semi skimmed milk	0.039506	0.016844	0.020344	0.168412
PWY-6519 8-amino-7-oxononanoate biosynthesis I	Fish	0.10287	0.043682	0.01984	0.170057
PWY-7663 Gondoate biosynthesis (anaerobic)	Olive oil	0.050957	0.02192	0.021456	0.170728
PWY-6124 Inosine-5′-phosphate biosynthesis II	Semi skimmed milk	0.039804	0.017088	0.021207	0.172452
PHOSLIPSYN-PWY Superpathway of phospholipid biosynthesis I (bacteria)	Eggs	0.063628	0.027362	0.021386	0.173275
PWY-7228 Superpathway of guanosine nucleotides de novo biosynthesis I	Red meat	0.055988	0.024081	0.021408	0.176672
PWY0-1061 Superpathway of L-alanine biosynthesis	Vegetables	-0.15751	0.067071	0.020104	0.177811
PWY-7238 Sucrose biosynthesis II	Semi skimmed milk	0.048432	0.020988	0.022352	0.17914
GLUTORN-PWY L-ornithine biosynthesis I	White meat	-0.05624	0.024061	0.020747	0.179913
BIOTIN-BIOSYNTHESIS-PWY Biotin biosynthesis I	Fish	0.09501	0.040851	0.021396	0.180877
PWY-7197 Pyrimidine deoxyribonucleotide phosphorylation	Semi skimmed milk	0.054499	0.023681	0.022751	0.18168
PWY-6969 TCA cycle V (2-oxoglutarate synthase)	Pasta or rice	0.090958	0.038989	0.020973	0.181872
PWY-5505 L-glutamate and L-glutamine biosynthesis	Olive oil	0.09413	0.041352	0.024153	0.184262
PWY-6151 S-adenosyl-L-methionine salvage I	Semi skimmed milk	0.047918	0.020901	0.023258	0.184403
PWY-7111 Pyruvate fermentation to isobutanol (engineered)	Semi skimmed milk	0.059268	0.025846	0.023197	0.184403
PWY-5989 Stearate biosynthesis II (bacteria and plants)	Fish	0.106224	0.045979	0.022243	0.185411
PWY0-862 5Z-dodecenoate biosynthesis I	Butter	-0.10618	0.045887	0.022057	0.188331
PWY-6892 Thiazole component of thiamine diphosphate biosynthesis I	Yogurt	0.053917	0.023418	0.022755	0.188496
PWY-6126 Superpathway of adenosine nucleotides de novo biosynthesis II	Red meat	0.053657	0.023439	0.02346	0.189365
PWY-6126 Superpathway of adenosine nucleotides de novo biosynthesis II	Semi skimmed milk	0.053053	0.023285	0.024121	0.189892
GLUCUROCAT-PWY Superpathway of β-D-glucuronoside degradation	Coffee	-0.06964	0.030093	0.02203	0.190296
PWY0-162 Superpathway of pyrimidine ribonucleotides de novo biosynthesis	Semi skimmed milk	0.067244	0.029611	0.024559	0.192113
PWY-7664 Oleate biosynthesis IV (anaerobic)	Fish	0.104962	0.045865	0.023517	0.192644
ASPASN-PWY Superpathway of L-aspartate and L-asparagine biosynthesis	Olive oil	0.063699	0.028225	0.02537	0.192879
GLUCONEO-PWY Gluconeogenesis I	Semi skimmed milk	0.067508	0.029797	0.024865	0.193008
DTDPRHAMSYN-PWY dTDP-β-L-rhamnose biosynthesis	Spirits	0.048224	0.021369	0.025509	0.195955
PWY-7761 NAD salvage pathway II (PNC IV cycle)	Butter	-0.12858	0.056048	0.023164	0.196279
PWY-6292 Superpathway of L-cysteine biosynthesis (mammalian)	Olive oil	0.087418	0.038921	0.026072	0.197543
THISYN-PWY Superpathway of thiamine diphosphate biosynthesis I	Eggs	0.052334	0.023206	0.025578	0.202079
PWY-6282 Palmitoleate biosynthesis I (from 5Z-dodec-5-enoate)	Fish	0.105961	0.046858	0.02519	0.202613
ARO-PWY Chorismate biosynthesis I	Semi skimmed milk	0.040738	0.018235	0.026973	0.203284
PWY-7664 Oleate biosynthesis IV (anaerobic)	Butter	-0.10172	0.044734	0.024421	0.203738
FASYN-ELONG-PWY Fatty acid elongation (saturated)	Butter	-0.09938	0.043761	0.024597	0.203748
PWY-5659 GDP-mannose biosynthesis	Yogurt	0.053403	0.023656	0.025434	0.20384
PWY-7228 Superpathway of guanosine nucleotides de novo biosynthesis I	Semi skimmed milk	0.053419	0.023949	0.027197	0.203979
FASYN-ELONG-PWY Fatty acid elongation (saturated)	Fish	0.101045	0.044891	0.025858	0.206489
PHOSLIPSYN-PWY Superpathway of phospholipid biosynthesis I (bacteria)	Olive oil	0.067549	0.030423	0.02782	0.207945
PWY-5941 Glycogen degradation II	Spirits	0.04748	0.021383	0.027831	0.209438
GLUCOSE1PMETAB-PWY Glucose and glucose-1-phosphate degradation	Spirits	0.093396	0.042124	0.028055	0.210409
PWY-7237 Myo-, chiro-, and scyllo-inositol degradation	Olive oil	0.072211	0.032639	0.02835	0.210493
METH-ACETATE-PWY Methanogenesis from acetate	Vegetables	-0.08128	0.036098	0.025783	0.211995
PWY-5989 Stearate biosynthesis II (bacteria and plants)	Butter	-0.10075	0.044885	0.02628	0.213882
PWY-6282 Palmitoleate biosynthesis I (from 5Z-dodec-5-enoate)	Butter	-0.10223	0.045711	0.026835	0.215064
PWY0-1586 Peptidoglycan maturation (meso-diaminopimelate containing)	Olive oil	0.05382	0.024484	0.029383	0.216025
GLUCUROCAT-PWY Superpathway of β-D-glucuronoside degradation	Eggs	0.06518	0.029497	0.028621	0.219097
GLCMANNANAUT-PWY Superpathway of N-acetylglucosamine, N-acetylmannosamine, and N-acetylneuraminate degradation	Olive oil	0.058915	0.026895	0.02999	0.219155
PWY-7242 D-fructuronate degradation	Coffee	-0.07246	0.032288	0.026306	0.219547
PWY-2942 L-lysine biosynthesis III	Semi skimmed milk	0.040192	0.018358	0.030148	0.220884
PWY-5097 L-lysine biosynthesis VI	Spirits	0.042447	0.019385	0.030096	0.221232
DAPLYSINESYN-PWY L-lysine biosynthesis I	Spirits	0.117654	0.053871	0.030474	0.223277
PWY-6703 PreQ0 biosynthesis	Olive oil	0.054644	0.025095	0.030978	0.224011
PWY-6936 Seleno-amino acid biosynthesis (plants)	Red meat	-0.07153	0.032655	0.029985	0.228244
COMPLETE-ARO-PWY Superpathway of aromatic amino acid biosynthesis	Semi skimmed milk	0.039872	0.018343	0.031297	0.228552
PWY-7977 L-methionine biosynthesis IV	Beer	0.044889	0.020327	0.02868	0.231526
PWY-3001 Superpathway of L-isoleucine biosynthesis I	Semi skimmed milk	0.039321	0.018208	0.032386	0.232154
PWY-702 L-methionine biosynthesis II	Semi skimmed milk	0.08624	0.040104	0.033095	0.235482
PWY-3841 Folate transformations II (plants)	Butter	-0.04416	0.020186	0.0303	0.236022
PWY-6628 Superpathway of L-phenylalanine biosynthesis	Semi skimmed milk	0.06656	0.031003	0.033398	0.236125
PWY-6823 Molybdopterin biosynthesis	Semi skimmed milk	0.059408	0.027755	0.033885	0.236607
GLUCOSE1PMETAB-PWY Glucose and glucose-1-phosphate degradation	Semi skimmed milk	0.092375	0.043243	0.034223	0.237425
PWY-7238 Sucrose biosynthesis II	Butter	-0.04485	0.020559	0.030703	0.238322
PWY-1269 CMP-3-deoxy-D-manno-octulosonate biosynthesis	Eggs	0.078218	0.036107	0.031846	0.238846
PWY-6628 Superpathway of L-phenylalanine biosynthesis	Cold cuts	-0.06828	0.031329	0.030872	0.239094
PWY-6901 Superpathway of glucose and xylose degradation	Semi skimmed milk	0.038971	0.018279	0.034658	0.239687
GLCMANNANAUT-PWY Superpathway of N-acetylglucosamine, N-acetylmannosamine, and N-acetylneuraminate degradation	Yogurt	-0.05224	0.024055	0.031535	0.240576
COA-PWY-1 Superpathway of coenzyme A biosynthesis III (mammals)	Semi skimmed milk	0.038179	0.017968	0.03528	0.240988
ANAEROFRUCAT-PWY Homolactic fermentation	Semi skimmed milk	0.048528	0.022906	0.035838	0.241826
COA-PWY Coenzyme A biosynthesis I (prokaryotic)	Semi skimmed milk	0.038847	0.018337	0.035821	0.241826
GLYCOLYSIS-ED-PWY Superpathway of glycolysis and Entner–Doudoroff pathway	Semi skimmed milk	0.058437	0.02757	0.035645	0.241826
PWY-6121 5-aminoimidazole ribonucleotide biosynthesis I	Semi skimmed milk	0.038397	0.018206	0.036595	0.243991
PWY-6125 Superpathway of guanosine nucleotides de novo biosynthesis II	Semi skimmed milk	0.054091	0.025648	0.036599	0.243991
FERMENTATION-PWY Mixed-acid fermentation	Yogurt	-0.09559	0.044281	0.03243	0.244049
NONOXIPENT-PWY Pentose phosphate pathway, non-oxidative branch I	Spirits	0.052872	0.024789	0.034484	0.244582
PWY0-1261 Anhydromuropeptides recycling I	Vegetables	0.076974	0.03538	0.031106	0.248398
VALSYN-PWY L-valine biosynthesis	Spirits	0.041184	0.019504	0.036365	0.252282
PWY-7761 NAD salvage pathway II (PNC IV cycle)	Spirits	0.117638	0.05578	0.03657	0.252911
NONMEVIPP-PWY Methylerythritol phosphate pathway I	Semi skimmed milk	0.039732	0.019094	0.039148	0.253266
PWY-6163 Chorismate biosynthesis from 3-dehydroquinate	Semi skimmed milk	0.039679	0.019088	0.039356	0.253266
PWY-8004 Entner–Doudoroff pathway I	Semi skimmed milk	0.059824	0.028788	0.039359	0.253266
COBALSYN-PWY Superpathway of adenosylcobalamin salvage from cobinamide I	Olive oil	0.055625	0.026569	0.03787	0.254787
PWY-702 L-methionine biosynthesis II	Red meat	-0.08617	0.04048	0.034865	0.25545
PWY-7111 Pyruvate fermentation to isobutanol (engineered)	Spirits	0.052979	0.025313	0.037995	0.257951
PWY-7229 Superpathway of adenosine nucleotides de novo biosynthesis I	Red meat	0.043131	0.020389	0.036072	0.260848
PWY-5973 cis-Vaccenate biosynthesis	Olive oil	0.047309	0.022812	0.039805	0.260942
PWY-8187 L-arginine degradation XIII (reductive Stickland reaction)	Semi skimmed milk	0.067036	0.032506	0.040932	0.261869
VALSYN-PWY L-valine biosynthesis	White meat	-0.04319	0.020371	0.035691	0.266723
PWY-5121 Superpathway of geranylgeranyl diphosphate biosynthesis II (via MEP)	Olive oil	0.080142	0.038979	0.041427	0.268627
OANTIGEN-PWY O-antigen building blocks biosynthesis (E. coli)	Spirits	0.060177	0.029233	0.041218	0.274561
PWY-8187 L-arginine degradation XIII (reductive Stickland reaction)	Eggs	-0.06754	0.032665	0.040416	0.275227
BRANCHED-CHAIN-AA-SYN-PWY Superpathway of branched-chain amino acid biosynthesis	Semi skimmed milk	0.043776	0.021564	0.044103	0.27528
PWY-5941 Glycogen degradation II	Semi skimmed milk	0.044513	0.021957	0.04434	0.27528
PWY-7357 Thiamine phosphate formation from pyrithiamine and oxythiamine (yeast)	Eggs	0.04756	0.023028	0.040583	0.275519
X1CMET2-PWY Folate transformations III (E. coli)	Semi skimmed milk	0.036691	0.018134	0.044789	0.276198
PWY-7851 Coenzyme A biosynthesis II (eukaryotic)	Semi skimmed milk	0.036792	0.018214	0.045213	0.276509
ARGSYNBSUB-PWY L-arginine biosynthesis II (acetyl cycle)	White meat	-0.05299	0.025259	0.037609	0.27738
PWY-6386 UDP-N-acetylmuramoyl-pentapeptide biosynthesis II (lysine-containing)	Spirits	0.04295	0.020929	0.041881	0.277538
GLYCOLYSIS-PWY Glycolysis I (from glucose-6-phosphate)	Semi skimmed milk	0.052816	0.026267	0.046214	0.279549
PWY-6387 UDP-N-acetylmuramoyl-pentapeptide biosynthesis I (meso-diaminopimelate-containing)	Spirits	0.042752	0.020951	0.04304	0.2816
PWY0-1061 Superpathway of L-alanine biosynthesis	Spirits	0.12556	0.061563	0.043107	0.2816
RIBOSYN2-PWY Flavin biosynthesis I (bacteria and plants)	Spirits	0.03562	0.017454	0.043037	0.2816
PWY-1042 Glycolysis IV	Semi skimmed milk	0.041873	0.020937	0.0473	0.2838
ILEUSYN-PWY L-isoleucine biosynthesis I (from threonine)	Semi skimmed milk	0.043929	0.021978	0.047428	0.283803
PWY-6629 Superpathway of L-tryptophan biosynthesis	Semi skimmed milk	0.037333	0.01874	0.048128	0.287218
VALSYN-PWY L-valine biosynthesis	Semi skimmed milk	0.039835	0.020008	0.048289	0.287403
PWY-7357 Thiamine phosphate formation from pyrithiamine and oxythiamine (yeast)	Olive oil	0.051173	0.025537	0.04676	0.288355
PEPTIDOGLYCANSYN-PWY Peptidoglycan biosynthesis I (meso-diaminopimelate-containing)	Spirits	0.042623	0.021173	0.045887	0.29527
PWY-6969 TCA cycle V (2-oxoglutarate synthase)	Beer	0.07829	0.03786	0.040312	0.296487
PWY-621 Sucrose degradation III (sucrose invertase)	Vegetables	0.067622	0.032833	0.0411	0.297208
PWY0-162 Superpathway of pyrimidine ribonucleotides de novo biosynthesis	Vegetables	-0.06547	0.031809	0.041258	0.297376
PWY-6163 Chorismate biosynthesis from 3-dehydroquinate	Butter	-0.03815	0.018686	0.042974	0.29907
PWY-3841 Folate transformations II (plants)	Semi skimmed milk	0.04064	0.020679	0.051228	0.29928
PWY-6700 Queuosine biosynthesis I (de novo)	Semi skimmed milk	0.042044	0.021391	0.051161	0.29928
PWY-841 Superpathway of purine nucleotides de novo biosynthesis I	Red meat	0.039809	0.0195	0.04296	0.299908
BIOTIN-BIOSYNTHESIS-PWY Biotin biosynthesis I	Butter	-0.08151	0.039999	0.043386	0.29998
PWY-5484 Glycolysis II (from fructose-6-phosphate)	Semi skimmed milk	0.052095	0.026538	0.051552	0.300381
DAPLYSINESYN-PWY L-lysine biosynthesis I	Fruit	-0.12158	0.058651	0.039868	0.301042
PWY-6519 8-amino-7-oxononanoate biosynthesis I	Whole milk	-0.08908	0.043507	0.042355	0.302344
TRPSYN-PWY L-tryptophan biosynthesis	Spirits	0.04118	0.020605	0.047411	0.30245
PANTOSYN-PWY Superpathway of coenzyme A biosynthesis I (bacteria)	Semi skimmed milk	0.034571	0.017671	0.052329	0.304113
PWY-7953 UDP-N-acetylmuramoyl-pentapeptide biosynthesis III (meso-diaminopimelate-containing)	Butter	-0.04191	0.020684	0.044572	0.304459
PWY-5103 L-isoleucine biosynthesis III	Semi skimmed milk	0.045683	0.023422	0.052984	0.307115
PWY-6969 TCA cycle V (2-oxoglutarate synthase)	Spirits	0.075353	0.037887	0.048508	0.308558
PWY-6628 Superpathway of L-phenylalanine biosynthesis	Spirits	0.060222	0.030339	0.048956	0.310523
GLCMANNANAUT-PWY Superpathway of N-acetylglucosamine, N-acetylmannosamine, and N-acetylneuraminate degradation	Semi skimmed milk	0.046883	0.024247	0.055049	0.311758
ARGSYN-PWY L-arginine biosynthesis I (via L-ornithine)	White meat	-0.04908	0.024175	0.044116	0.311902
PWY-5103 L-isoleucine biosynthesis III	Beer	0.046702	0.022965	0.043698	0.313946
PWY-5097 L-lysine biosynthesis VI	Semi skimmed milk	0.038335	0.019932	0.056345	0.318283
PWY-6385 Peptidoglycan biosynthesis III (mycobacteria)	Spirits	0.040281	0.020523	0.051515	0.321501
PWY0-1586 Peptidoglycan maturation (meso-diaminopimelate-containing)	Beer	0.043562	0.021636	0.045778	0.321602
PWY-7220 Adenosine deoxyribonucleotides de novo biosynthesis II	Semi skimmed milk	0.055716	0.029193	0.058215	0.323093
PWY-7222 Guanosine deoxyribonucleotides de novo biosynthesis II	Semi skimmed milk	0.055716	0.029193	0.058215	0.323093
PWY-7237 Myo-, chiro-, and scyllo-inositol degradation	Spirits	0.056471	0.028953	0.052975	0.325221
PWY-7328 Superpathway of UDP-glucose–derived O-antigen building block biosynthesis	Spirits	0.061882	0.031718	0.052886	0.325221
PWY-6385 Peptidoglycan biosynthesis III (mycobacteria)	Butter	-0.04099	0.020596	0.048403	0.325623
PWY-6122 5-aminoimidazole ribonucleotide biosynthesis II	Semi skimmed milk	0.038195	0.020098	0.059266	0.325626
PWY-6277 Superpathway of 5-aminoimidazole ribonucleotide biosynthesis	Semi skimmed milk	0.038195	0.020098	0.059266	0.325626
PWY-I9 L-cysteine biosynthesis VI (from L-methionine)	Semi skimmed milk	0.096013	0.050589	0.059581	0.325626
PEPTIDOGLYCANSYN-PWY Peptidoglycan biosynthesis I (meso-diaminopimelate-containing)	Butter	-0.04223	0.021269	0.048948	0.326319
ARO-PWY Chorismate biosynthesis I	Butter	-0.03547	0.017885	0.049268	0.327366
PWY-6519 8-amino-7-oxononanoate biosynthesis I	Butter	-0.08467	0.042822	0.049906	0.328788
TRNA-CHARGING-PWY tRNA charging	Butter	-0.04239	0.021446	0.049942	0.328788
PWY-7242 D-fructuronate degradation	Eggs	0.062306	0.031701	0.05119	0.329396
BIOTIN-BIOSYNTHESIS-PWY Biotin biosynthesis I	Whole milk	-0.08103	0.040707	0.048341	0.33328
PWY-2942 L-lysine biosynthesis III	Butter	-0.03541	0.018004	0.051114	0.334731
PWY-5154 L-arginine biosynthesis III (via N-acetyl-L-citrulline)	Beer	0.051876	0.026257	0.049922	0.338919
GLYCOGENSYNTH-PWY Glycogen biosynthesis I (from ADP-D-glucose)	Red meat	-0.04208	0.021537	0.052519	0.345973
PWY-6147 6-hydroxymethyl-dihydropterin diphosphate biosynthesis I	Beer	0.061311	0.031258	0.051592	0.346024
PWY-6527 Stachyose degradation	White meat	-0.05736	0.02911	0.050581	0.346571
PWY-4041 γ-glutamyl cycle	Fish	-0.07481	0.038367	0.053063	0.347335
PWY-5188 Tetrapyrrole biosynthesis I (from glutamate)	Red meat	-0.05847	0.029992	0.053036	0.348343
PWY-6936 Seleno-amino acid biosynthesis (plants)	White meat	-0.06504	0.033124	0.051466	0.349357
PWY-6386 UDP-N-acetylmuramoyl-pentapeptide biosynthesis II (lysine-containing)	Butter	-0.04078	0.021045	0.054574	0.350159
FERMENTATION-PWY Mixed-acid fermentation	White meat	-0.08857	0.045324	0.052501	0.352604
X1CMET2-PWY Folate transformations III (E. coli)	Butter	-0.03421	0.017745	0.055764	0.35472
PWY-5097 L-lysine biosynthesis VI	Butter	-0.03758	0.019514	0.056053	0.355386
PWY-6387 UDP-N-acetylmuramoyl-pentapeptide biosynthesis I (meso-diaminopimelate-containing)	Butter	-0.04047	0.021068	0.056669	0.356386
PWY-5154 L-arginine biosynthesis III (via N-acetyl-L-citrulline)	Pasta or rice	0.052943	0.026955	0.051343	0.35731
FERMENTATION-PWY Mixed-acid fermentation	Spirits	0.081376	0.043253	0.061799	0.358642
PWY-7953 UDP-N-acetylmuramoyl-pentapeptide biosynthesis III (meso-diaminopimelate-containing)	Spirits	0.038823	0.020639	0.061895	0.358642
PWY-6121 5-aminoimidazole ribonucleotide biosynthesis I	Spirits	0.033413	0.017822	0.062743	0.360855
POLYISOPRENSYN-PWY Polyisoprenoid biosynthesis (E. coli)	Whole milk	-0.07451	0.038625	0.055574	0.361479
COA-PWY Coenzyme A biosynthesis I (prokaryotic)	Butter	-0.03436	0.017978	0.057987	0.363645
PYRIDNUCSYN-PWY NAD de novo biosynthesis I (from aspartate)	Spirits	0.031329	0.016764	0.063603	0.363916
PWY-6151 S-adenosyl-L-methionine salvage I	Butter	-0.03928	0.02059	0.058411	0.365272
THRESYN-PWY Superpathway of L-threonine biosynthesis	Semi skimmed milk	0.032551	0.017857	0.070329	0.365646
PWY-6470 Peptidoglycan biosynthesis V (β-lactam resistance)	Fruit	-0.09855	0.050241	0.051635	0.36623
PWY-6629 Superpathway of L-tryptophan biosynthesis	Spirits	0.034071	0.018326	0.064922	0.366732
PWY-7456 β-1,4-mannan degradation	Olive oil	0.059733	0.0319	0.062948	0.366785
GALACTUROCAT-PWY D-galacturonate degradation I	Olive oil	0.071634	0.038303	0.063288	0.367797
DAPLYSINESYN-PWY L-lysine biosynthesis I	Butter	-0.1029	0.054271	0.05988	0.369261
PWY-I9 L-cysteine biosynthesis VI (from L-methionine)	Red meat	-0.09702	0.051012	0.059045	0.371328
PWY-6292 Superpathway of L-cysteine biosynthesis (mammalian)	Semi skimmed milk	0.063538	0.035309	0.073918	0.371509
P41-PWY Pyruvate fermentation to acetate and S-lactate I	Vegetables	-0.06055	0.031464	0.056122	0.372218
PWY-5030 L-histidine degradation III	Red meat	0.084706	0.044605	0.059412	0.372586
COLANSYN-PWY Colanic acid building blocks biosynthesis	Pasta or rice	0.036336	0.018862	0.055935	0.374309
ANAGLYCOLYSIS-PWY Glycolysis III (from glucose)	Semi skimmed milk	0.032632	0.018382	0.077854	0.37642
HISTSYN-PWY L-histidine biosynthesis	Semi skimmed milk	0.033433	0.018841	0.078006	0.37642
GLYCOLYSIS-ED-PWY Superpathway of glycolysis and Entner–Doudoroff pathway	Spirits	0.049768	0.027031	0.067524	0.376643
PWY-5100 Pyruvate fermentation to acetate and lactate II	Vegetables	-0.05988	0.031391	0.058279	0.377201
PENTOSE-P-PWY Pentose phosphate pathway	Yogurt	0.039709	0.0208	0.05823	0.377983
PWY-7208 Superpathway of pyrimidine nucleobase salvage	Semi skimmed milk	0.03535	0.019979	0.078866	0.378966
PWY-5686 UMP biosynthesis I	Spirits	0.037323	0.02038	0.069021	0.379273
PWY-7345 Superpathway of anaerobic sucrose degradation	Spirits	0.045756	0.02498	0.068941	0.379273
PWY-7790 UMP biosynthesis II	Spirits	0.037323	0.02038	0.069021	0.379273
PWY-7791 UMP biosynthesis III	Spirits	0.037323	0.02038	0.069021	0.379273
PWY0-162 Superpathway of pyrimidine ribonucleotides de novo biosynthesis	Red meat	0.056428	0.029954	0.0615	0.380308
PWY-5667 CDP-diacylglycerol biosynthesis I	Semi skimmed milk	0.030475	0.017283	0.079891	0.380618
PWY0-1319 CDP-diacylglycerol biosynthesis II	Semi skimmed milk	0.030475	0.017283	0.079896	0.380618
PWY-5030 L-histidine degradation III	Olive oil	0.091044	0.049149	0.065793	0.381359
PWY-6700 Queuosine biosynthesis I (de novo)	Spirits	0.038149	0.020899	0.069899	0.382206
PWY-621 Sucrose degradation III (sucrose invertase)	Coffee	-0.06066	0.031676	0.057375	0.382501
PWY-5667 CDP-diacylglycerol biosynthesis I	Butter	-0.03144	0.016867	0.064358	0.385106
PWY0-1319 CDP-diacylglycerol biosynthesis II	Butter	-0.03144	0.016867	0.06435	0.385106
PWY-7400 L-arginine biosynthesis IV (archaebacteria)	Wine	-0.04334	0.022916	0.060611	0.386659
GLUTORN-PWY L-ornithine biosynthesis I	Spirits	0.041932	0.023206	0.07273	0.387138
PWY-6386 UDP-N-acetylmuramoyl-pentapeptide biosynthesis II (lysine-containing)	Semi skimmed milk	0.037673	0.021533	0.082227	0.388125
PWY-6630 Superpathway of L-tyrosine biosynthesis	Cold cuts	-0.07848	0.041167	0.05849	0.38993
PWY-7117 C4 photosynthetic carbon assimilation cycle (PEPCK type)	Spirits	0.114776	0.063959	0.074689	0.391303
PWY0-862 5Z-dodecenoate biosynthesis I	Olive oil	-0.09607	0.052476	0.068975	0.392629
PWY-7208 Superpathway of pyrimidine nucleobase salvage	Yogurt	0.037122	0.019813	0.063006	0.392867
PWY-6731 Starch degradation III	Olive oil	0.061235	0.033593	0.070196	0.393025
PWY-6126 Superpathway of adenosine nucleotides de novo biosynthesis II	Fruit	-0.04726	0.024792	0.058603	0.393172
PWY-6892 Thiazole component of thiamine diphosphate biosynthesis I	Olive oil	0.048034	0.02641	0.070861	0.393256
PWY-7198 Pyrimidine deoxyribonucleotides de novo biosynthesis IV	Fruit	-0.07537	0.039742	0.059851	0.393592
PWY-7229 Superpathway of adenosine nucleotides de novo biosynthesis I	Fruit	-0.04081	0.021504	0.059755	0.393592
THRESYN-PWY Superpathway of L-threonine biosynthesis	Fruit	-0.0359	0.018912	0.059673	0.393592
PWY-6151 S-adenosyl-L-methionine salvage I	Spirits	0.036655	0.020534	0.076269	0.393759
COMPLETE-ARO-PWY Superpathway of aromatic amino acid biosynthesis	Butter	-0.03324	0.018003	0.066852	0.394182
PWY-2941 L-lysine biosynthesis II	Pasta or rice	0.0568	0.029977	0.060038	0.395504
PANTO-PWY Phosphopantothenate biosynthesis I	Semi skimmed milk	0.031475	0.018133	0.084678	0.39576
COA-PWY-1 Superpathway of coenzyme A biosynthesis III (mammals)	Butter	-0.03237	0.017624	0.068331	0.397107
PWY-7851 Coenzyme A biosynthesis II (eukaryotic)	Butter	-0.03275	0.017848	0.068617	0.397725
PWY-5484 Glycolysis II (from fructose-6-phosphate)	Yogurt	0.049358	0.026502	0.064632	0.398566
PWY-6470 Peptidoglycan biosynthesis V (β-lactam resistance)	Semi skimmed milk	0.081959	0.04743	0.085977	0.398787
PWY-6609 Adenine and adenosine salvage III	Butter	-0.03707	0.020267	0.06935	0.398851
PWY-7198 Pyrimidine deoxyribonucleotides de novo biosynthesis IV	Spirits	0.065004	0.036609	0.077829	0.399029
PWY-7323 Superpathway of GDP-mannose-derived O-antigen building block biosynthesis	Pasta or rice	0.04732	0.025089	0.061193	0.399733
DAPLYSINESYN-PWY L-lysine biosynthesis I	Eggs	-0.10299	0.055748	0.066599	0.400679
PWY-7208 Superpathway of pyrimidine nucleobase salvage	Fruit	-0.03956	0.021078	0.062552	0.403677
HSERMETANA-PWY L-methionine biosynthesis III	Semi skimmed milk	0.043359	0.025211	0.087494	0.403818
BRANCHED-CHAIN-AA-SYN-PWY Superpathway of branched-chain amino acid biosynthesis	Beer	0.039543	0.021212	0.064182	0.404781
PWY-5505 L-glutamate and L-glutamine biosynthesis	Eggs	0.069048	0.037545	0.067846	0.405125
PWY-5695 Inosine-5′-phosphate degradation	Olive oil	0.036662	0.020523	0.075993	0.40554
PWY-6387 UDP-N-acetylmuramoyl-pentapeptide biosynthesis I (meso-diaminopimelate-containing)	Semi skimmed milk	0.036888	0.021562	0.089161	0.406444
DAPLYSINESYN-PWY L-lysine biosynthesis I	Vegetables	-0.11022	0.059295	0.064936	0.407225
ARG-POLYAMINE-SYN-PWY Superpathway of arginine and polyamine biosynthesis	Spirits	0.084056	0.047801	0.080647	0.407444
PWY-7220 Adenosine deoxyribonucleotides de novo biosynthesis II	Fruit	-0.05789	0.030973	0.063584	0.407966
PWY-7222 Guanosine deoxyribonucleotides de novo biosynthesis II	Fruit	-0.05789	0.030973	0.063584	0.407966
HISTSYN-PWY L-histidine biosynthesis	Spirits	0.032223	0.018424	0.08232	0.408838
HISDEG-PWY L-histidine degradation I	Spirits	-0.06234	0.035689	0.082698	0.408887
P41-PWY Pyruvate fermentation to acetate and S-lactate I	Spirits	0.050262	0.028796	0.082897	0.40896
TRNA-CHARGING-PWY tRNA charging	Spirits	0.037326	0.02141	0.0833	0.410037
FERMENTATION-PWY Mixed-acid fermentation	Semi skimmed milk	0.075615	0.044367	0.09032	0.410351
GLYCOLYSIS-PWY Glycolysis I (from glucose-6-phosphate)	Yogurt	0.04807	0.026247	0.069166	0.413876
COBALSYN-PWY Superpathway of adenosylcobalamin salvage from cobinamide I	Semi skimmed milk	0.040694	0.023996	0.091938	0.415689
PWY-6125 Superpathway of guanosine nucleotides de novo biosynthesis II	Fruit	-0.05057	0.027269	0.065692	0.416674
PWY-6121 5-aminoimidazole ribonucleotide biosynthesis I	Butter	-0.03193	0.01787	0.076018	0.41669
PEPTIDOGLYCANSYN-PWY Peptidoglycan biosynthesis I (meso-diaminopimelate-containing)	Semi skimmed milk	0.036894	0.021786	0.092432	0.41707
GALACTUROCAT-PWY D-galacturonate degradation I	Coffee	-0.06616	0.035626	0.065268	0.417225
ILEUSYN-PWY L-isoleucine biosynthesis I (from threonine)	White meat	-0.04125	0.022503	0.068787	0.417231
PWY-6385 Peptidoglycan biosynthesis III (mycobacteria)	Semi skimmed milk	0.035691	0.021104	0.092863	0.417621
PWY-2942 L-lysine biosynthesis III	Spirits	0.031184	0.018023	0.085673	0.41801
NONMEVIPP-PWY Methylerythritol phosphate pathway I	Butter	-0.03342	0.018745	0.076696	0.418339
PWY-7228 Superpathway of guanosine nucleotides de novo biosynthesis I	Fruit	-0.04701	0.025502	0.067296	0.421064
PWY-724 Superpathway of L-lysine, L-threonine, and L-methionine biosynthesis II	Butter	-0.0297	0.01675	0.078294	0.423932
PWY-1269 CMP-3-deoxy-D-manno-octulosonate biosynthesis	Beer	0.065043	0.035466	0.068543	0.425043
PWY-7208 Superpathway of pyrimidine nucleobase salvage	Whole milk	-0.03601	0.019814	0.071159	0.425236
GLYCOGENSYNTH-PWY Glycogen biosynthesis I (from ADP-D-glucose)	Butter	-0.03698	0.020892	0.078785	0.425552
ILEUSYN-PWY L-isoleucine biosynthesis I (from threonine)	Beer	0.039571	0.021612	0.069012	0.425572
ASPASN-PWY Superpathway of L-aspartate and L-asparagine biosynthesis	Wine	0.047759	0.025989	0.068103	0.425883
PWY-8004 Entner–Doudoroff pathway I	Wine	-0.05378	0.029324	0.068617	0.426693
PWY-7357 Thiamine phosphate formation from pyrithiamine and oxythiamine (yeast)	White meat	-0.04265	0.023478	0.071305	0.427828
PWY-6122 5-aminoimidazole ribonucleotide biosynthesis II	Butter	-0.03472	0.019711	0.080247	0.42824
PWY-6277 Superpathway of 5-aminoimidazole ribonucleotide biosynthesis	Butter	-0.03472	0.019711	0.080247	0.42824
PWY-8004 Entner–Doudoroff pathway I	Spirits	0.0482	0.02823	0.089764	0.428921
UDPNAGSYN-PWY UDP-N-acetyl-D-glucosamine biosynthesis I	Spirits	0.062624	0.036688	0.089842	0.428921
PWY-6700 Queuosine biosynthesis I (de novo)	Butter	-0.0369	0.020996	0.080885	0.430173
PWY-7117 C4 photosynthetic carbon assimilation cycle (PEPCK type)	Coffee	0.123137	0.067218	0.068932	0.430445
ASPASN-PWY Superpathway of L-aspartate and L-asparagine biosynthesis	Spirits	0.042558	0.024974	0.09041	0.43071
PWY-5384 Sucrose degradation IV (sucrose phosphorylase)	Coffee	-0.0554	0.03031	0.069543	0.430954
PWY-6470 Peptidoglycan biosynthesis V (β-lactam resistance)	Vegetables	-0.09242	0.050637	0.069858	0.431992
PWY-6969 TCA cycle V (2-oxoglutarate synthase)	White meat	-0.07159	0.039775	0.073895	0.432843
GLYCOLYSIS-ED-PWY Superpathway of glycolysis and the Entner–Doudoroff pathway	Wine	-0.05104	0.028126	0.071565	0.432899
GLUTORN-PWY L-ornithine biosynthesis I	Red meat	-0.04291	0.023978	0.075457	0.435104
GLYCOLYSIS-ED-PWY Superpathway of glycolysis and the Entner–Doudoroff pathway	Olive oil	0.052956	0.030787	0.087354	0.435788
DAPLYSINESYN-PWY L-lysine biosynthesis I	Coffee	0.103471	0.056934	0.071133	0.436935
ARGININE-SYN4-PWY L-ornithine biosynthesis II	Olive oil	0.097986	0.057147	0.088279	0.436944
PWY-5154 L-arginine biosynthesis III (via N-acetyl-L-citrulline)	Coffee	-0.04977	0.027439	0.071723	0.437737
PWY-I9 L-cysteine biosynthesis VI (from L-methionine)	Wine	-0.09277	0.051446	0.073352	0.437746
PWY-6969 TCA cycle V (2-oxoglutarate synthase)	Semi skimmed milk	0.064346	0.038965	0.100714	0.439046
SER-GLYSYN-PWY Superpathway of L-serine and glycine biosynthesis I	Semi skimmed milk	0.032394	0.019655	0.101407	0.439046
TRPSYN-PWY L-tryptophan biosynthesis	Semi skimmed milk	0.034922	0.021178	0.101175	0.439046
PWY-6703 preQ₀ biosynthesis	Semi skimmed milk	0.037299	0.022683	0.102246	0.439476
PWY-7221 Guanosine ribonucleotides de novo biosynthesis	Semi skimmed milk	0.03626	0.022088	0.102742	0.439476
PWY-7953 UDP-N-acetylmuramoyl-pentapeptide biosynthesis III (meso-diaminopimelate-containing)	Semi skimmed milk	0.034833	0.021215	0.102687	0.439476
PWY-7282 4-amino-2-methyl-5-diphosphomethylpyrimidine biosynthesis II	Olive oil	0.056136	0.032949	0.090368	0.439751
PWY66-429 Fatty acid biosynthesis initiation (mitochondria)	Olive oil	0.030563	0.017974	0.091091	0.439751
PWY-841 Superpathway of purine nucleotides de novo biosynthesis I	Fruit	-0.03718	0.020559	0.072619	0.44007
PWY-6703 preQ₀ biosynthesis	Spirits	0.037361	0.02214	0.093643	0.440442
FERMENTATION-PWY Mixed-acid fermentation	Beer	0.078078	0.04326	0.073018	0.440488
PWY-7238 Sucrose biosynthesis II	Red meat	-0.03766	0.021313	0.079188	0.440789
POLYISOPRENSYN-PWY Polyisoprenoid biosynthesis (E. coli)	Butter	0.066018	0.038061	0.084894	0.441521
PWY-6823 Molybdopterin biosynthesis	Butter	-0.04741	0.027282	0.084321	0.441521
ILEUSYN-PWY L-isoleucine biosynthesis I (from threonine)	Fish	-0.03917	0.022127	0.078709	0.441659
PWY-7357 Thiamine phosphate formation from pyrithiamine and oxythiamine (yeast)	Semi skimmed milk	0.037646	0.023033	0.104229	0.443273
PWY-1269 CMP-3-deoxy-D-manno-octulosonate biosynthesis	Spirits	0.059385	0.035362	0.095123	0.443641
PWY-6124 Inosine-5′-phosphate biosynthesis II	Fruit	-0.03274	0.018229	0.074551	0.444901
PANTOSYN-PWY Superpathway of coenzyme A biosynthesis I (bacteria)	Butter	-0.02965	0.01733	0.089325	0.447146
HISDEG-PWY L-histidine degradation I	White meat	0.066226	0.037239	0.077415	0.448722
PWY-5103 L-isoleucine biosynthesis III	Fish	-0.04152	0.023583	0.080369	0.449419
PWY-5121 Superpathway of geranylgeranyl diphosphate biosynthesis II (via MEP)	Semi skimmed milk	0.057398	0.03548	0.107814	0.450954
ARO-PWY Chorismate biosynthesis I	Spirits	0.029676	0.017914	0.099713	0.45326
PWY-621 Sucrose degradation III (sucrose invertase)	Red meat	0.054423	0.031118	0.08229	0.453312
THISYNARA-PWY Superpathway of thiamine diphosphate biosynthesis III (eukaryotes)	Eggs	0.045275	0.026	0.08361	0.453996
THRESYN-PWY Superpathway of L-threonine biosynthesis	Olive oil	0.033333	0.019978	0.097253	0.454891
GLYCOGENSYNTH-PWY Glycogen biosynthesis I (from ADP-D-glucose)	Semi skimmed milk	0.034201	0.021428	0.11252	0.459446
PWY-5686 UMP biosynthesis I	Semi skimmed milk	0.033304	0.02094	0.113827	0.459446
PWY-7790 UMP biosynthesis II	Semi skimmed milk	0.033304	0.02094	0.113827	0.459446
PWY-7791 UMP biosynthesis III	Semi skimmed milk	0.033304	0.02094	0.113827	0.459446
P41-PWY Pyruvate fermentation to acetate and S-lactate I	Fruit	-0.05512	0.031252	0.079786	0.459873
PWY-7383 Anaerobic energy metabolism (invertebrates, cytosol)	Olive oil	-0.09893	0.06013	0.101801	0.459946
PWY0-1261 Anhydromuropeptides recycling I	Olive oil	0.061172	0.037103	0.101185	0.459946
GALACTUROCAT-PWY D-galacturonate degradation I	Eggs	0.060282	0.034814	0.085388	0.460101
PWY-6859 All-trans-farnesol biosynthesis	Butter	0.087435	0.051869	0.093954	0.460435
X1CMET2-PWY Folate transformations III (E. coli)	Fruit	-0.03388	0.019269	0.080763	0.462053
PWY0-1296 Purine ribonucleosides degradation	Butter	-0.03944	0.023499	0.095374	0.462349
NONMEVIPP-PWY Methylerythritol phosphate pathway I	Spirits	0.030564	0.01873	0.104812	0.463114
PWY-724 Superpathway of L-lysine, L-threonine, and L-methionine biosynthesis II	Spirits	0.027332	0.016775	0.105348	0.463114
PWY-6123 Inosine-5′-phosphate biosynthesis I	Fruit	-0.03142	0.017982	0.082675	0.464851
PWY-4041 γ-glutamyl cycle	White meat	-0.06861	0.03917	0.081913	0.465082
PWY-6902 Chitin degradation II (Vibrio)	Yogurt	0.107456	0.061809	0.084161	0.467092
PWY-5030 L-histidine degradation III	Yogurt	0.076429	0.044413	0.087323	0.468253
PWY-5030 L-histidine degradation III	Spirits	-0.07019	0.043368	0.107618	0.468899
PWY-6936 Seleno-amino acid biosynthesis (plants)	Bread	0.057462	0.032615	0.080178	0.470475
ARGSYNBSUB-PWY L-arginine biosynthesis II (acetyl cycle)	Red meat	-0.04324	0.025101	0.086944	0.471219
PYRIDNUCSYN-PWY NAD de novo biosynthesis I (from aspartate)	Semi skimmed milk	0.027067	0.017205	0.117806	0.471225
PWY-6507 4-deoxy-L-threo-hex-4-enopyranuronate degradation	Butter	-0.05668	0.034129	0.09888	0.472072
PWY-6936 Seleno-amino acid biosynthesis (plants)	Semi skimmed milk	0.051124	0.032565	0.118516	0.472218
HISDEG-PWY L-histidine degradation I	Fish	0.063245	0.03667	0.08667	0.472746
PWY-5188 Tetrapyrrole biosynthesis I (from glutamate)	Fish	-0.05159	0.029881	0.086304	0.472746
PWY0-1586 Peptidoglycan maturation (meso-diaminopimelate-containing)	Spirits	0.03478	0.021654	0.110302	0.474173
P41-PWY Pyruvate fermentation to acetate and S-lactate I	Semi skimmed milk	0.046207	0.029532	0.119724	0.474325
PWY-4041 γ-glutamyl cycle	Semi skimmed milk	0.060032	0.038442	0.120459	0.474325
TRNA-CHARGING-PWY tRNA charging	Semi skimmed milk	0.034342	0.021994	0.120504	0.474325
ARGSYN-PWY L-arginine biosynthesis I (via L-ornithine)	Spirits	0.037333	0.02327	0.1107	0.474427
PWY-7323 Superpathway of GDP-mannose-derived O-antigen building block biosynthesis	Red meat	0.043127	0.025142	0.088283	0.474887
PWY-7392 Taxadiene biosynthesis (engineered)	Butter	0.078318	0.047345	0.100212	0.475366
PWY-5686 UMP biosynthesis I	Butter	-0.03378	0.020493	0.101372	0.476791
[truncated: 3,117 more rows]

## Sheet: Table S8
Supplementary Table 8: Associations between dietary patterns and gut microbial species.
[truncated: 474 more rows]

[truncated: 15 more sheets: Table S9, Table S10, Table S11, Table S12, Table S13, Table S14, Table S15, Table S16, Table S17, Table S18, Table S19, Table S20, Table S21, Table S22, Table S23]
