# Supplementary material
Source: Research Square preprint supplement (doi:10.21203/rs.3.rs-9888793/v1)
Supplement: Supplementary file 2 [file 1df434d1d5d063b537b0b79e.pdf]

## Supplementary Notes

### ***Processing of FFQ Data***

Dietary habits were collected at enrolment using a quantitative Food Frequency Questionnaire (FFQ). The FFQ included questions on weekly consumption frequency (daily for coffee) of various foods and beverages, including coffee, beer, wine, spirits, milk (whole, semi-skimmed, and skimmed), yogurt, cheese, red and white meat, fish, processed meat, eggs, pasta/rice, bread, vegetables, fruit, olive oil, and butter. Data quality checks were performed to identify missing or inconsistent values, which were corrected, if necessary, using participants' daily dietary diaries. Weekly consumption rates are given in **Supplementary Notes - Table 1**.

FFQ responses were processed using a custom R script (*FFQ\_convert.R*), available in our github folder (see **Data Availability Statement**), designed to convert reported consumption frequencies into estimated daily nutrient intakes. First, categorical frequency responses (e.g., “daily,” “weekly,” “occasional” — defined as less than once per week) were standardized into quantitative daily consumption frequencies. This standardization accounted for variations in response formats and food subtypes, such as whole, semi-skimmed, and skimmed milk.

Next, daily frequencies were multiplied by standard portion sizes (in grams or milliliters) to calculate average daily amounts of each food consumed. Standard portions were obtained from the Italian Society of Human Nutrition's table ([https://sinu.it/wp-content/uploads/2019/07/20141111\\_LARN\\_Porzioni.pdf](https://sinu.it/wp-content/uploads/2019/07/20141111_LARN_Porzioni.pdf)). The calculated daily food amounts were then merged with nutrient data from the Italian Food Composition Database (BDA) (<https://bda.ideo.it/>), which provides nutrient content per 100 g of food or 100 ml of beverage for over a thousand foods. For each FFQ food group (e.g., pasta and rice), we estimated average nutrient composition based on the most consumed items in that category (**Supplementary Notes - Table 2**). Finally, nutrient intakes for each participant were computed as the product of food-specific nutrient values and the corresponding daily amounts, then summed across all foods to obtain total daily intakes. These totals included carbohydrates, fats, proteins, sugars, sodium, cholesterol, fiber, and energy, making them directly comparable with nutrient information from MyFitnessPal.

### ***Diet scores derived from FFQ***

Four commonly used dietary indices were derived for each participant using standard definitions adapted to the foods available in the FFQ: the Mediterranean Diet Score (aMED), the simplified Healthy Eating Index (HEI), the Dietary Approaches to Stop Hypertension (DASH) score, and the Alternative Healthy Eating Index (AHEI). All dietary indices were computed using a custom R script (*Derive\_Diet\_Scores.R*), available in our github folder (see **Data Availability Statement**), implementing the scoring algorithms described below.

Adherence to the aMED was assessed using a population-specific, median-based scoring system. The score included vegetables, fruits, cereals (pasta/rice plus bread), fish, red and processed meats (red meat plus cured meats), and dairy products (whole milk plus cheese). Participants received 1 point for each beneficial component if intake was above the population median and 1 point for each detrimental component if intake was below the median, resulting in total scores ranging from 0 to 9.

The HEI was calculated by rescaling each dietary component to a 0–10 scale, with higher values indicating better adherence. Components included vegetables, fruits, fish, grains, low-fat dairy products, olive oil, and alcohol, while red and processed meat and foods high in saturated fat (butter, cheese, whole milk) were reverse-scored. Alcohol intake was scored as 10 for moderate consumption (1–2 units/day), 8 for abstainers, and 5 for higher intake. The total HEI score was calculated as the mean of all component scores multiplied by 10, yielding a 0–100 scale.

The modified DASH score was based on quintile rankings (1–5) for vegetables, fruits, cereals (pasta/rice plus bread), and low-fat dairy products (skimmed milk, semi-skimmed milk, and yogurt), with higher intakes receiving higher scores. Red and processed meat intake was reverse-scored (6 minus quintile). The total DASH score was obtained by summing all component scores.

The AHEI included fruits, vegetables, whole grains, fish, olive oil, alcohol, and red and processed meat. All components were rescaled to a 0–10 range, with red and processed meat reverse-scored and alcohol optimally scored for moderate intake. The total AHEI score was calculated as the mean of all component scores multiplied by 10, resulting in a 0–100 scale.

### ***Processing of daily dietary data from MyFitnessPal***

For each participant, intake data were collected directly from her personal MyFitnessPal account. The diaries can be exported in two possible formats (PDF or HTML), so two different extraction procedures were applied accordingly.

When the diary was downloaded as a PDF file, we extracted the nutritional tables using Tabula (<https://tabula.technology/> version 1.2.1). The software usually detected the table layout automatically; however, when needed, we manually adjusted the selection to ensure that all daily tables were correctly captured. Once extracted, each day was saved as a separate CSV file and later combined so that all entries from the same diary formed a single dataset for that participant. The resulting files were then processed in R (version 4.4.3), where column names and formats were standardized across days to ensure consistency. If a diary contained unlogged days, an empty entry with all values set to NA was added to preserve the temporal structure and maintain a continuous daily time series.

When the diary was available as an HTML file, extraction followed a slightly different but more streamlined workflow. Each daily log was converted into CSV format using a custom Python script available in our github folder (see **Data Availability Statement**). As with the PDF workflow, the daily CSV files were then combined into a single dataset for each participant and harmonized in R. In this case as well, if one or more days were missing from the original diary, we inserted empty rows with all values set to NA so that the time series remained complete and aligned daily. After assembling the complete dataset for each participant, we performed a data-cleaning step to manage implausible diary entries. Since incomplete logging was common, total daily caloric intake was used as the basis for identifying unrealistic values. Any day with a reported intake of less than 500 kcal or more than 2,500 kcal was classified as an outlier. These thresholds were selected because they closely matched the 2.5th and 97.5th percentiles of the calorie distribution observed among the first participants screened and were therefore considered reasonable boundaries for plausible daily intake.

Rather than removing those days, we treated them as missing. For each flagged entry, values for calories and all associated nutrient variables (carbohydrates, fat, protein, sugars, sodium, cholesterol, and fiber) were replaced with NA. This approach kept the daily timeline intact while preventing implausible or incomplete records from affecting downstream analyses.

Boxplots were generated for the distribution of each nutrient using both the whole-study and the whole-week daily averages. Extreme outliers were defined according to the  $3 \times$  IQR criterion. This process was implemented using a custom R script (*Identify\_MyFitnessPal\_Outliers.R*), available in our github folder (see **Data Availability Statement**). Suspect values recorded in MyFitnessPal were then cross-checked against corresponding food entries in FatSecret (<https://foods.fatsecret.com/>), and any discrepancies were corrected. Overall, an error rate of approximately 2% was observed in MyFitnessPal entries, with missing or incorrect values occurring most frequently for cholesterol, sodium, and fiber (see **Supplementary Notes – Appendix**).

To obtain a more stable estimate of dietary intake and reduce day-to-day variability, we calculated a 3-day averaged intake for each participant. For every biological sampling day, we identified the three preceding days in the diary and computed the arithmetic mean of total calories and all recorded nutrient variables (carbohydrates, fat, protein, sugars, sodium, cholesterol, and fiber). The average was calculated using all available valid values within that 3-day window, even when only one or two days contained usable data. Only when none of the three days included a valid numeric entry was the 3-day average assigned as missing. Finally, hormonal phase-specific averages were calculated by taking the mean of the 3-day averaged nutrient intakes corresponding to the same hormonal phase. This process was implemented using a custom R script (*Prepare\_Diaries\_3day.R*), available in our github folder (see **Data Availability Statement**).

### ***Differences across study centers***

Differences in energy and nutrient intakes (carbohydrates, fats, proteins, cholesterol, sodium, sugars, and fiber) across study centers were evaluated using both total individual means derived from daily food diaries and estimates obtained from food frequency questionnaires (FFQs). Linear models adjusted for age and BMI were fitted, and the resulting residuals were used in subsequent analyses to account for potential confounding. For FFQ-based analyses, an additional parameter was included to account for the different questionnaire administered to the first 30 participants in the Trieste cohort. Pairwise Wilcoxon rank-sum tests were used to compare energy and nutrient intake distributions between centers, and Kruskal–Wallis tests were performed to assess overall differences across all study centers.

Differences across study centers were also assessed for the four dietary scores (aMED, HEI, DASH, and AHEI), adjusted for age and BMI. All analyses were conducted using a custom R script (*Compare\_Study\_Centers.R*), available in our github folder (see **Data Availability Statement**). Most nutrient intakes showed limited significant differences across study centers, varying by dietary assessment method. Protein intake differed significantly between Trieste and Cagliari in daily diaries, supported by both pairwise tests (adjusted  $p = 0.01$ ) and Kruskal–Wallis tests (adjusted  $p = 0.017$ ), with higher intake in Cagliari compared to Trieste (daily protein: 65.7 g vs. 53.3 g, respectively) (**Supplementary Notes – Figure 1**). For FFQ-derived estimates, fiber intake differed significantly between Trieste and Cagliari in pairwise comparisons (adjusted  $p = 0.047$ ); however, this difference did not remain statistically significant in the global Kruskal–Wallis test after correction for multiple testing. Other nutrients displayed nominal differences that were not robust after adjustment. Overall, protein intake exhibited the most consistent variation across centers (**Supplementary Notes – Table 3 and Figure 2**).

Diet quality scores differed across study centers, with the strongest and most consistent differences observed between Trieste and Cagliari. For HEI, DASH, and AHEI, pairwise Wilcoxon

tests showed significant differences between Trieste and Cagliari after multiple-testing correction (adjusted p-values ranging from 0.017 to 0.019), and these findings were supported by significant global Kruskal–Wallis tests (adjusted  $p \leq 0.027$ ). The aMED score showed only nominal differences between centers, which did not remain significant after correction in either pairwise or global analyses (**Supplementary Notes – Table 4 and Figure 3**).

### **Identification of dietary patterns**

Macronutrient intake data were used to identify underlying dietary patterns across study samples using data derived separately from FFQs and daily diaries (total mean intakes). Macronutrient intakes were converted into energy contributions using standard Atwater conversion factors (4 kcal/g for carbohydrates and proteins; 9 kcal/g for fats). Total energy intake was calculated as the sum of energy derived from the three macronutrients, and macronutrient proportions were expressed as fractions of total energy intake. Given the compositional nature of macronutrient proportion data, a Centered Log-Ratio (CLR) transformation was applied prior to multivariate analyses to mitigate spurious correlations and enable the use of Euclidean-based statistical methods. Principal Component Analysis (PCA) was then performed on the CLR-transformed variables to explore variance structure and reduce data dimensionality. To identify homogeneous dietary patterns, K-means clustering was applied to the PCA scores. The optimal number of clusters was determined using the Elbow method, based on the within-cluster sum of squares. Finally, cluster-specific mean macronutrient proportions were calculated to summarize the dietary composition characterizing each identified dietary pattern. All analyses were performed using a custom R script (*Identify\_Clusters.R*)

### **Microbiome Composition across centers and menstrual phases**

We analyzed the relative abundance of genera and species across the three study centers (Trieste, Cagliari, and Bologna). At the genus level, samples from Cagliari and Trieste were predominantly composed of *Bacteroides* (14% in Cagliari, 13% in Trieste) and *Phocaeicola* (9.5% in Cagliari, 11.7% in Trieste), whereas Bologna samples were enriched in *Bacteroides* (11.8%) and *Segatella* (10.6%), shown in Supplementary Figure 4. At the species level, center-specific differences were more evident: in Bologna, the most abundant species were *Segatella copri* (8.4%) and *Faecalibacterium prausnitzii* (5.7%), while in Cagliari and Trieste, the dominant species included *Bacteroides uniformis* (6% in Cagliari), *Faecalibacterium prausnitzii* (5.7% in both centers), and *Phocaeicola vulgatus* (6.8% in Trieste).

Pairwise comparisons of *Segatella* abundance were performed using Wilcoxon tests, where Trieste exhibited a significantly lower *Segatella* abundance compared to both Bologna and Cagliari, while Bologna and Cagliari showed comparable levels (Wilcoxon paired tests, adjusted p-values: Trieste versus Bologna,  $p = 0.004$ ; Trieste versus Cagliari,  $p = 4.23 \times 10^{-6}$ ; Bologna vs Cagliari,  $p$ -value = 0.98). Post-hoc Dunn's tests showed negative z-values for Trieste versus Bologna and Trieste versus Cagliari, further confirming a reduced *Segatella* abundance in Trieste, compared to the other centers (Dunn's test, adjusted p-values: Bologna versus Trieste,  $p = 1.67 \times 10^{-3}$ ; Cagliari versus Trieste,  $p$ -value =  $1.92 \times 10^{-5}$ ). Comparison between Bologna and Cagliari was not statistically significant (adjusted p-value = 0.61). These results indicated that Trieste was depleted in *Segatella* relative to the other centers. We also modeled *Segatella* relative abundance using a linear mixed-effects model, including fixed effects for phase, center, batch, total post-QC reads, and DNA concentration, with a random intercept for women ID. In Bologna, the model indicated a significant increase in *Segatella* abundance associated with the

Bologna center itself (estimate = 0.069, standard error = 0.026,  $t = 2.64$ ,  $p$ -value = 0.009), consistent with our cross-center comparisons. Among menstrual phases, late luteal phase was associated with a modest but statistically significant decrease in *Segatella* abundance (estimate = -0.0125, standard error = 0.0060,  $t = -2.07$ ,  $p$ -value = 0.039), whereas ovulatory and early luteal phases did not show significant differences relative to follicular phase. Other covariates, including batch, total post-QC reads, and DNA concentration, were not significantly associated with *Segatella* abundance (all  $p$ -value > 0.25). These results suggested that center-specific differences primarily drove the variation in *Segatella* abundance. Finally, gut microbiomes of Bologna women were the least diverse and most dominated by few taxa (**Supplementary Notes - Figure 4**).

## Supplementary Notes Tables

### Supplementary Notes Table 1. Descriptive statistics of food habits from FFQ

Descriptive statistics of food habits. Mean, standard deviation (SD), minimum and maximum values of standardized weekly consumption of food categories (Coffee is referring to daily consumption). Last column indicate % of participants who consumed at least some quantity during the week.

| weekly_consumption_ffq | Mean  | SD   | Min | Max | % of consumers |
|------------------------|-------|------|-----|-----|----------------|
| Beer                   | 0.66  | 0.89 | 0   | 5   | 0.47           |
| Bread                  | 4.91  | 4.22 | 0   | 20  | 0.89           |
| Butter                 | 0.84  | 1.27 | 0   | 10  | 0.52           |
| Cheese                 | 3.13  | 2.20 | 0   | 14  | 0.93           |
| Coffee                 | 1.71  | 1.37 | 0   | 7   | 0.85           |
| Cold_cuts              | 1.21  | 1.23 | 0   | 7   | 0.71           |
| Eggs                   | 1.82  | 1.30 | 0   | 10  | 0.93           |
| Fish                   | 1.65  | 1.25 | 0   | 8   | 0.87           |
| Fruit                  | 6.99  | 4.48 | 0   | 21  | 0.96           |
| Olive_oil              | 10.26 | 3.90 | 0   | 14  | 0.99           |
| Pasta_or_rice          | 5.04  | 2.31 | 1   | 14  | 1.00           |
| Red_meat               | 1.42  | 1.21 | 0   | 6   | 0.80           |
| Semi_skimmed_milk      | 2.09  | 3.34 | 0   | 14  | 0.39           |
| Skimmed_milk           | 0.34  | 1.24 | 0   | 7   | 0.10           |
| Spirits                | 0.32  | 0.48 | 0   | 2   | 0.32           |
| Vegetables             | 10.32 | 3.98 | 0   | 20  | 0.99           |
| White_meat             | 1.94  | 1.52 | 0   | 10  | 0.84           |
| Whole_milk             | 0.79  | 1.89 | 0   | 7   | 0.21           |
| Wine                   | 0.62  | 0.78 | 0   | 3   | 0.47           |
| Yogurt                 | 2.65  | 2.60 | 0   | 14  | 0.77           |

**Supplementary Notes Table 2 – Standard portion sizes and nutrient composition of foods included in the FFQ derived from the BDA database.**

For each food, the table reports energy (kcal), available carbohydrates, total fat, total protein, cholesterol, sodium, total dietary fiber, and sugars. Sugars correspond to the sum of glucose, fructose, galactose, sucrose, maltose, and lactose. Nutrient values are expressed per 100 grams or 100 milliliters. These values were used to estimate average daily nutrient intakes from FFQ responses.

| Food Name         | Standard Portion (g/ml) | Energy (kcal) | Available Carbohydrates (g) | Total Fat (g) | Total Protein (g) | Cholesterol (mg) | Sodium (mg) | Total Fiber (g) | Sugars (g) |
|-------------------|-------------------------|---------------|-----------------------------|---------------|-------------------|------------------|-------------|-----------------|------------|
| Coffee            | 50                      | 1             | 0                           | 0             | 0.1               | 0                | 6.7         | 0               | 0          |
| Beer              | 330                     | 33.7          | 0.8                         | 0             | 0.3               | 0                | 8.4         | 0               | 1          |
| Wine              | 125                     | 73.4          | 1.4                         | 0             | 0                 | 0                | 7.6         | 0               | 0.1        |
| Spirits           | 40                      | 232.1         | 3.4                         | 0             | 0                 | 0                | 1.4         | 0               | 2.2        |
| Whole Milk        | 125                     | 61.7          | 4.9                         | 3.4           | 3.2               | 11               | 49          | 0               | 4.9        |
| Skimmed Milk      | 125                     | 36            | 5.3                         | 0.2           | 3.7               | 2                | 50.5        | 0               | 5.3        |
| Semi-Skimmed Milk | 125                     | 45.7          | 5                           | 1.5           | 3.3               | 7                | 44.7        | 0               | 5          |
| Yogurt            | 125                     | 71.7          | 7.8                         | 2.9           | 4                 | 7.6              | 54.1        | 0.1             | 7.8        |
| Cheese            | 75                      | 324.5         | 1.3                         | 25.7          | 21.8              | 83.3             | 714.5       | 0               | 1.2        |
| Red Meat          | 100                     | 160.4         | 0                           | 8.6           | 20.9              | 71.6             | 66.2        | 0               | 0          |
| White Meat        | 100                     | 163.5         | 0.1                         | 7.8           | 23.4              | 81.4             | 86.5        | 0               | 0          |
| Fish              | 100                     | 122           | 0.9                         | 5.1           | 18.1              | 73.7             | 302.5       | 0               | 0.5        |
| Processed Meats   | 50                      | 319.2         | 0.6                         | 24.9          | 23.2              | 80               | 1537.6      | 0               | 0.4        |
| Eggs              | 50                      | 128           | 0                           | 8.7           | 12.4              | 371              | 137         | 0               | 0          |
| Pasta & Rice      | 100                     | 334.5         | 65.4                        | 3.4           | 11.6              | 15.3             | 48.2        | 6.1             | 1.1        |
| Bread             | 50                      | 315.8         | 58.8                        | 5.7           | 9.1               | 1                | 597         | 4               | 0.9        |
| Vegetables        | 200                     | 26.4          | 3.1                         | 0.3           | 2                 | 0                | 39          | 2.2             | 0          |
| Fruit             | 150                     | 56            | 9.7                         | 0.9           | 0.9               | 0                | 3.8         | 2.9             | 9.4        |
| Olive Oil         | 10                      | 899.5         | 0                           | 100           | 0                 | 0                | 0           | 0               | 0          |
| Butter            | 10                      | 758           | 1.1                         | 83.4          | 0.8               | 250              | 7           | 0               | 1.1        |

**Supplementary Notes Table 3 – Differences across study centers.**

Pairwise Wilcoxon rank-sum tests were performed between all cohort pairs, and a Kruskal–Wallis test was used to assess differences in energy and nutrient intakes across study centers (Trieste, Cagliari, Bologna). All pairwise comparisons are reported, together with the corresponding p-values corrected for multiple testing using the Bonferroni method. All traits were adjusted for age and BMI to account for potential confounding. For FFQ-based analyses, an additional parameter was included to account for the different questionnaire administered to the first 30 participants.

| Trait         | Pairwise Wilcoxon rank-sum tests (unpaired) |          |               |        |        |        | Kruskal-Wallis |        |        |             |        |
|---------------|---------------------------------------------|----------|---------------|--------|--------|--------|----------------|--------|--------|-------------|--------|
|               | cohort 1                                    | cohort 2 | Daily Diaries |        | FFQ    |        | Daily Diaries  |        |        | FFQ         |        |
|               |                                             |          | pvalue        | p.adj  | pvalue | p.adj  | chi-squared    | pvalue | p.adj  | chi-squared | pvalue |
| Calories      | CAGLIARI                                    | BOLOGNA  | ns            | 1      | ns     | 1      | 3.50           | ns     | 1      | 7.46        | 0.0240 |
|               | TRIESTE                                     | BOLOGNA  | ns            | 1      | 0.0358 | ns     |                |        |        |             |        |
|               | TRIESTE                                     | CAGLIARI | 0.0721        | 1      | 0.0304 | ns     |                |        |        |             |        |
| Carbohydrates | CAGLIARI                                    | BOLOGNA  | 0.0482        | 1      | ns     | 1      | 4.98           | 0.0830 | ns     | 4.94        | 0.0847 |
|               | TRIESTE                                     | BOLOGNA  | ns            | 1      | ns     | 1      |                |        |        |             |        |
|               | TRIESTE                                     | CAGLIARI | 0.0363        | ns     | 0.0518 | 1      |                |        |        |             |        |
| Fats          | CAGLIARI                                    | BOLOGNA  | ns            | 1      | ns     | 1      | 2.29           | ns     | 1      | 5.49        | 0.0643 |
|               | TRIESTE                                     | BOLOGNA  | ns            | 1      | 0.0923 | 1      |                |        |        |             |        |
|               | TRIESTE                                     | CAGLIARI | ns            | 1      | 0.0533 | 1      |                |        |        |             |        |
| Proteins      | CAGLIARI                                    | BOLOGNA  | 0.0200        | ns     | ns     | 1      | 12.34          | 0.0021 | 0.0168 | 7.01        | 0.0300 |
|               | TRIESTE                                     | BOLOGNA  | ns            | 1      | 0.0327 | ns     |                |        |        |             |        |
|               | TRIESTE                                     | CAGLIARI | 0.0004        | 0.0100 | 0.0446 | 1      |                |        |        |             |        |
| Cholesterol   | CAGLIARI                                    | BOLOGNA  | ns            | 1      | ns     | 1      | 4.75           | 0.0930 | ns     | 4.76        | 0.0925 |
|               | TRIESTE                                     | BOLOGNA  | ns            | 1      | 0.0959 | 1      |                |        |        |             |        |
|               | TRIESTE                                     | CAGLIARI | 0.0248        | ns     | 0.0769 | 1      |                |        |        |             |        |
| Sodium        | CAGLIARI                                    | BOLOGNA  | ns            | 1      | ns     | 1      | 2.17           | ns     | 1      | 4.34        | ns     |
|               | TRIESTE                                     | BOLOGNA  | ns            | 1      | 0.0643 | 1      |                |        |        |             |        |
|               | TRIESTE                                     | CAGLIARI | ns            | 1      | ns     | 1      |                |        |        |             |        |
| Sugar         | CAGLIARI                                    | BOLOGNA  | 0.0186        | ns     | 0.0238 | ns     | 5.33           | 0.0697 | ns     | 7.28        | 0.0263 |
|               | TRIESTE                                     | BOLOGNA  | ns            | 1      | ns     | 1      |                |        |        |             |        |
|               | TRIESTE                                     | CAGLIARI | ns            | 1      | 0.0106 | ns     |                |        |        |             |        |
| Fiber         | CAGLIARI                                    | BOLOGNA  | ns            | 1      | 0.0642 | 1      | 4.11           | ns     | 1      | 9.99        | 0.0068 |
|               | TRIESTE                                     | BOLOGNA  | ns            | 1      | ns     | 1      |                |        |        |             |        |
|               | TRIESTE                                     | CAGLIARI | 0.0504        | 1      | 0.0020 | 0.0472 |                |        |        |             |        |

**Supplementary Notes Table 4 – Dietary scores differences across study centers.**

Pairwise Wilcoxon rank-sum tests performed between all cohort pairs and Kruskal–Wallis test were used to assess differences for FFQ-derived diet scores across study centers (Trieste, Cagliari, Bologna). All pairwise comparisons are reported, together with the corresponding p-values corrected for multiple testing using the Bonferroni method. Diet scores were adjusted for age and BMI to account for potential confounding, and an additional parameter included to account for the different questionnaire administered to the first 30 participants in the Trieste cohort.

| Diet score | Pairwise Wilcoxon rank-sum tests (unpaired) |          |        |        | Kruskal-Wallis |        |        |
|------------|---------------------------------------------|----------|--------|--------|----------------|--------|--------|
|            | cohort 1                                    | cohort 2 | pvalue | p.adj  | chi-squared    | pvalue | p.adj  |
| aMED       | CAGLIARI                                    | BOLOGNA  | 0.0722 | ns     | 6.27           | 0.0435 | ns     |
|            | TRIESTE                                     | BOLOGNA  | ns     | 1      |                |        |        |
|            | TRIESTE                                     | CAGLIARI | 0.0118 | ns     |                |        |        |
| HEI        | CAGLIARI                                    | BOLOGNA  | 0.0445 | ns     | 10.56          | 0.0051 | 0.0203 |
|            | TRIESTE                                     | BOLOGNA  | ns     | 1      |                |        |        |
|            | TRIESTE                                     | CAGLIARI | 0.0016 | 0.0186 |                |        |        |
| DASH       | CAGLIARI                                    | BOLOGNA  | ns     | 1      | 12.69          | 0.0018 | 0.007  |
|            | TRIESTE                                     | BOLOGNA  | 0.0211 | ns     |                |        |        |
|            | TRIESTE                                     | CAGLIARI | 0.0015 | 0.0175 |                |        |        |
| AHEI       | CAGLIARI                                    | BOLOGNA  | 0.057  | ns     | 10             | 0.0067 | 0.0269 |
|            | TRIESTE                                     | BOLOGNA  | ns     | 1      |                |        |        |
|            | TRIESTE                                     | CAGLIARI | 0.0014 | 0.0171 |                |        |        |

## Supplementary Notes Figures

### Supplementary Notes Figure 1 – Boxplots of daily diaries energy and nutrients intake across study centers

Pairwise Wilcoxon rank-sum tests between all cohort pairs. Nominal significant differences are indicated above the corresponding boxplot pairs (ns = not significant; \* =  $p < 0.05$ ; \*\* =  $p < 0.01$ ; \*\*\* =  $p < 0.001$ ). All traits were adjusted for age and BMI to account for potential confounding.

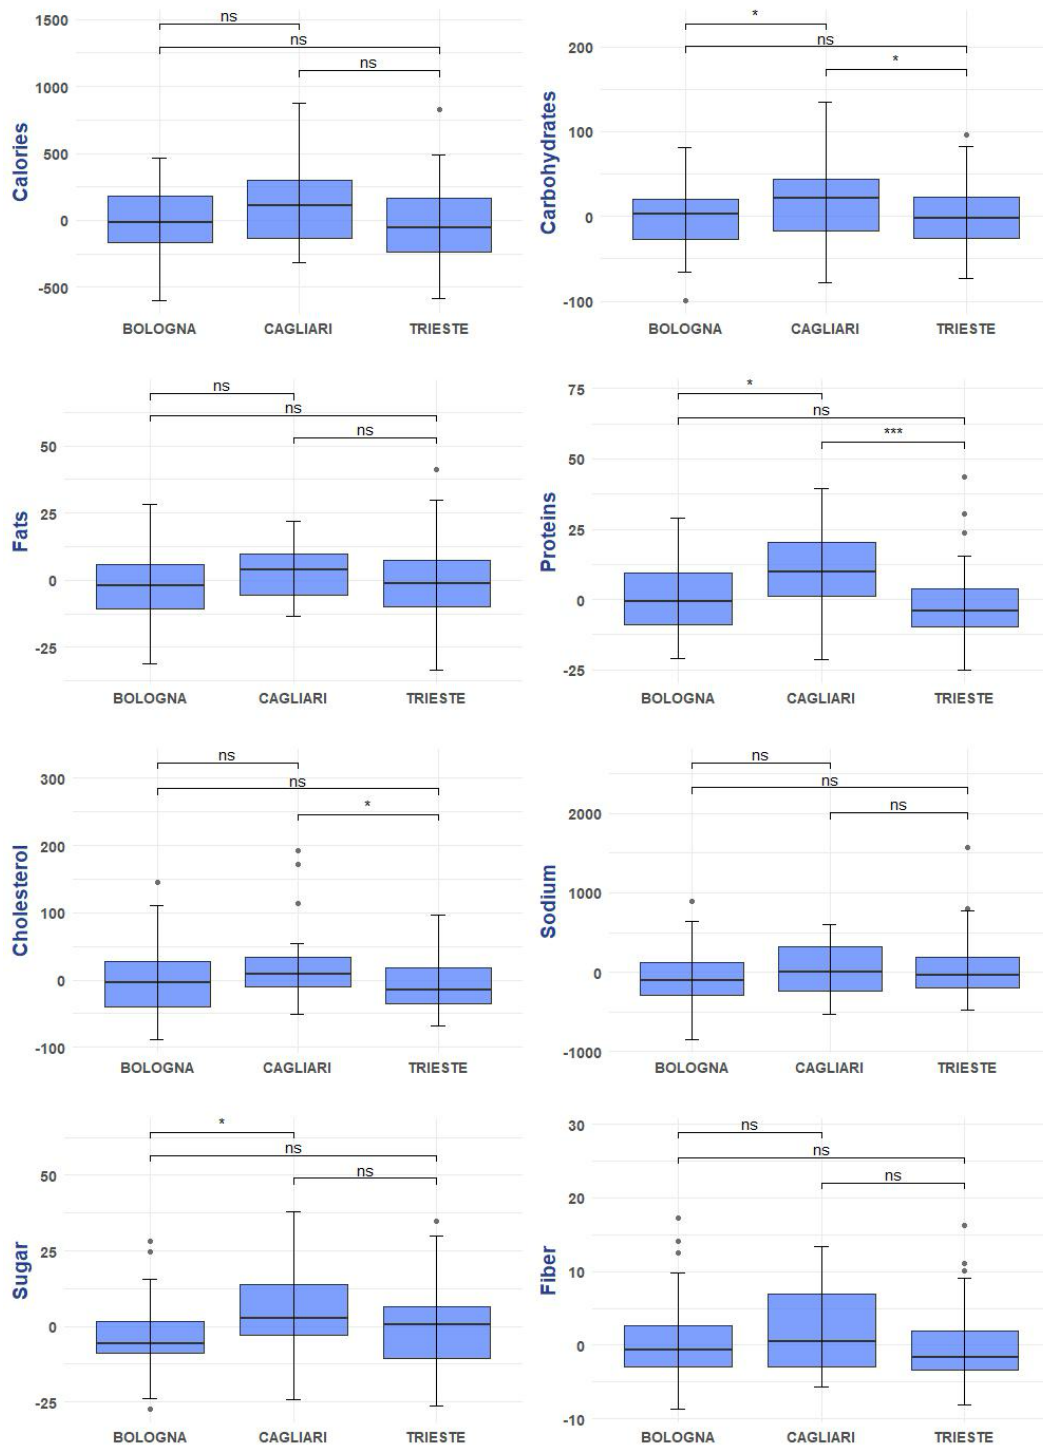

## Supplementary Notes Figure 2 – Boxplots of FFQ energy and nutrients intake across study centers

Pairwise Wilcoxon rank-sum tests between all cohort pairs. Nominal significant differences are indicated above the corresponding boxplot pairs (ns = not significant; \* =  $p < 0.05$ ). All traits were adjusted for age and BMI to account for potential confounding, and for an additional parameter to account for the different questionnaire administered to the first 30 participants in the Trieste cohort.

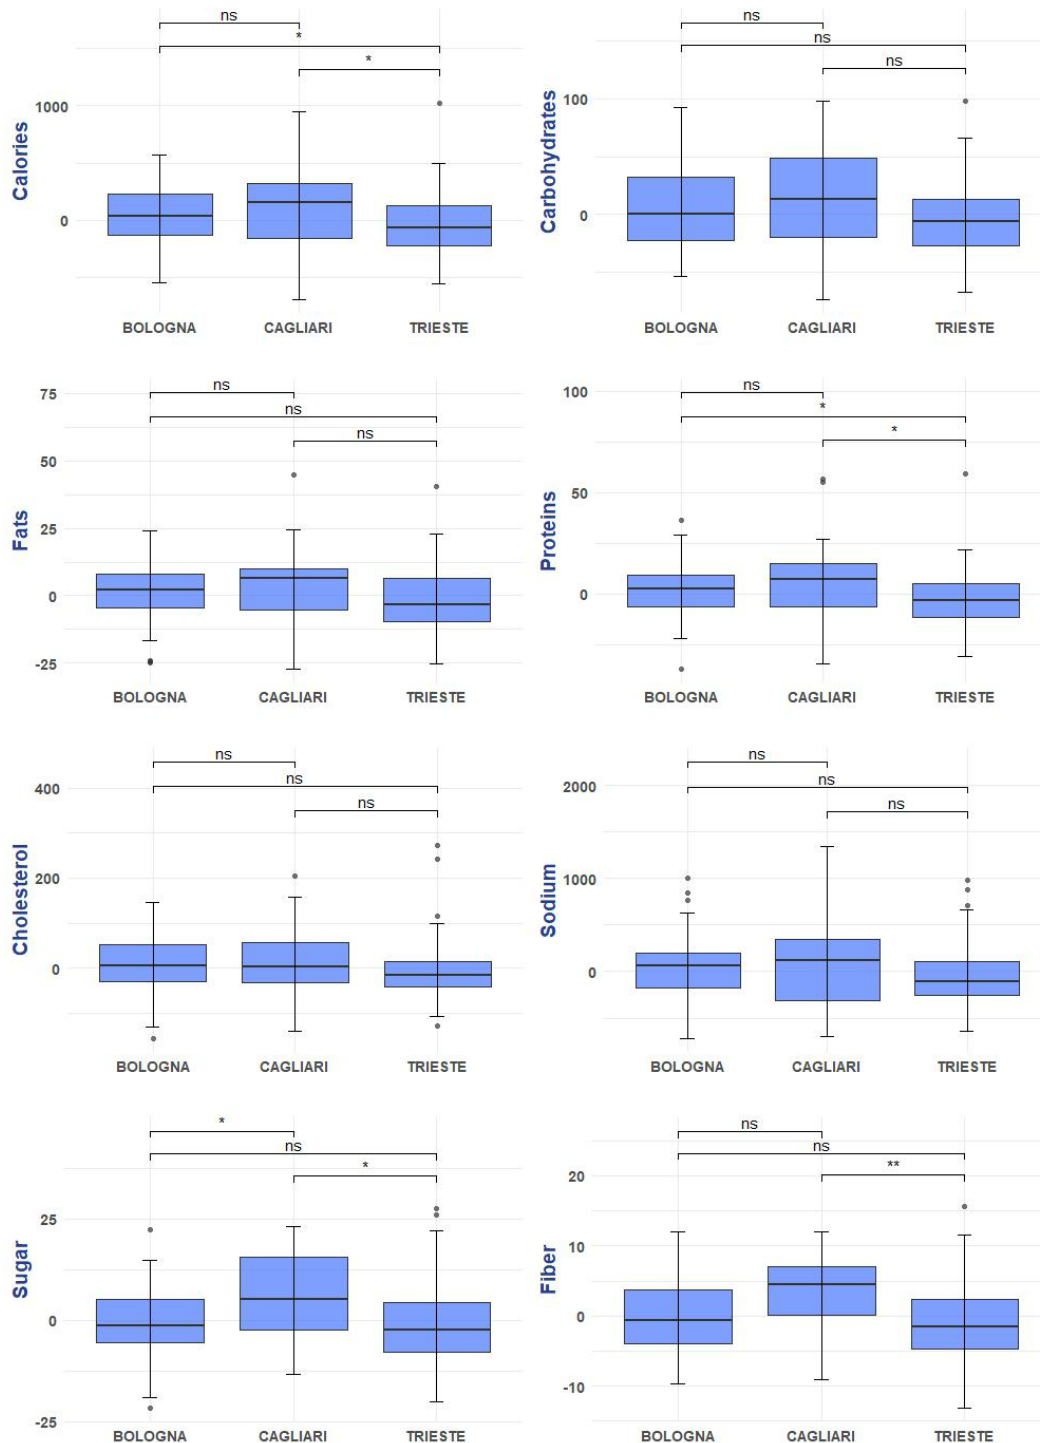

### Supplementary Notes Figure 3 – Boxplots of FFQ-derived diet scores across study centers

Pairwise Wilcoxon rank-sum tests between all cohort pairs. Nominal significant differences are indicated above the corresponding boxplot pairs ns =( not significant; \* =  $p < 0.05$ ; \*\* =  $p < 0.01$ ). All traits were adjusted for age and BMI to account for potential confounding, and for an additional parameter to account for the different questionnaire administered to the first 30 participants in the Trieste cohort.

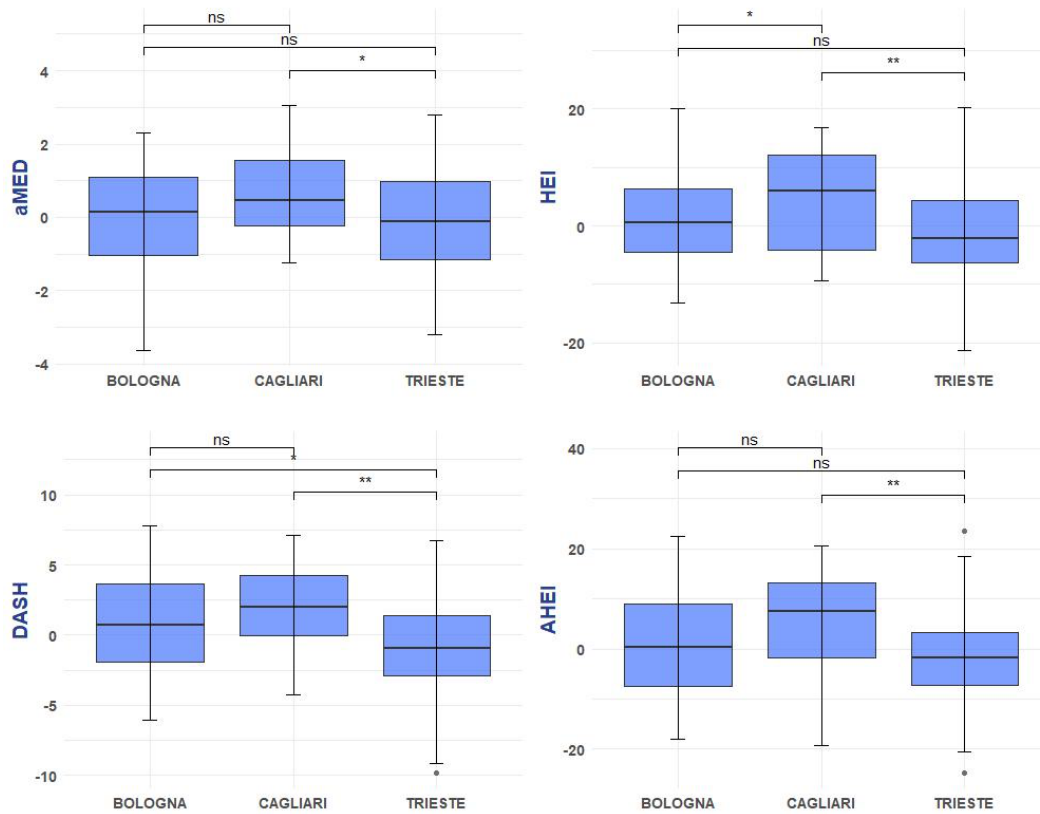

**Supplementary Notes Figure 4: Distribution of alpha and beta diversity of microbial species across study centers.** (A) Alpha diversity, measured by the Shannon index, is shown for each study center, illustrating within-sample diversity. (B) Beta diversity is visualized using centered CLR-transformed species abundances and the first principal coordinates (PCoA), with the proportion of variance explained indicated.

**A.**

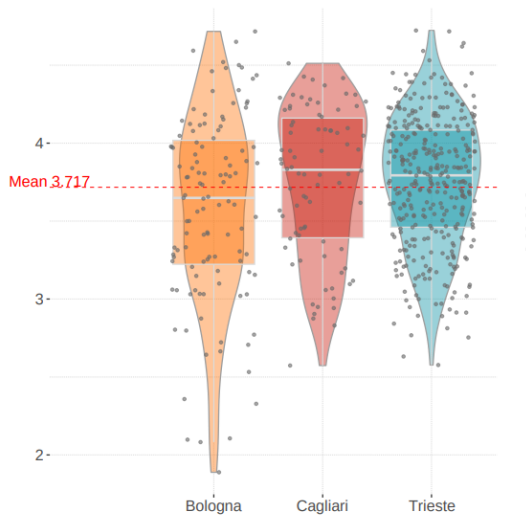

**B.**

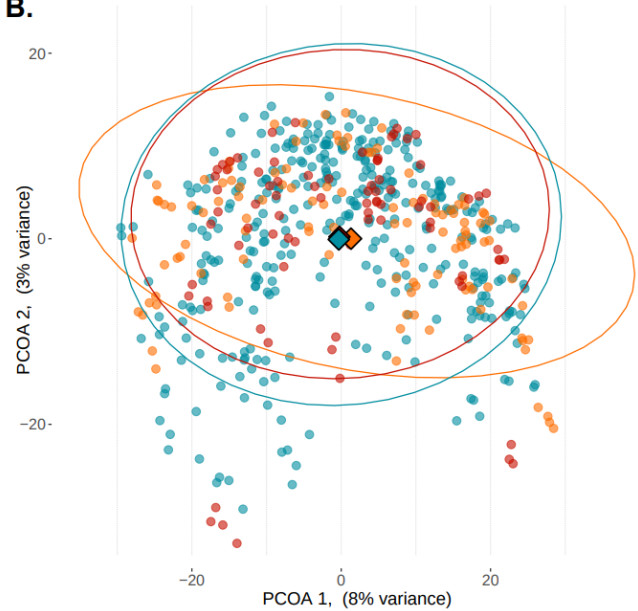

Center ◆ Bologna ◆ Cagliari ◆ Trieste

## Appendix

### Corrections of food nutritional values in MyFitnessPal.

Nutritional values recorded in MyFitnessPal (reported in parentheses) were corrected using values derived from corresponding entries in the FatSecret database. Corrections were applied when MyFitnessPal entries exhibited extreme outliers, defined according to the 3 × IQR criterion, using either the whole-study daily averages or the whole-week daily averages.

| Italian food name                                      | English food name                                  | Calories      | Carbohydrates | Fats       | Proteins | Cholesterol | Sodium      | Sugar     | Fiber     |
|--------------------------------------------------------|----------------------------------------------------|---------------|---------------|------------|----------|-------------|-------------|-----------|-----------|
| Vemondo Lidl - Cotoletta Vegetale, 100 g               | Vemondo Lidl - Vegetable Cutlet, 100 g             | 262 (1013)    | 25 (22)       | 11 (9)     | 14 (16)  | 0           | 388 (870)   | 1 (2)     | 4 (5)     |
| 2 Uova - Uova Sode, 2 uovo                             | 2 Eggs - Boiled Eggs, 2 egg                        | 128 (153)     | 0             | 9 (93)     | 12 (59)  | 371 (504)   | 137 (140)   | 0 (1)     | 0         |
| A pizza- Pizza Margherita, 350 g                       | A pizza- Pizza Margherita 350 g                    | 658           | 98            | 15         | 28       | 0           | 700 (4900)  | 9         | 6         |
| Galette di mais -Galette di mais , 40 g                | Corn galette -Corn galette , 40 g                  | 96.25 (1607)  | 20.25 (85)    | 0.8 (1)    | 2.1 (7)  | 0           | 73 (1)      | 0         | 0.75 (2)  |
| Alida - Cornetto, 1 cono                               | Alida - Croissant, 1 cone                          | 218 (971)     | 25            | 11 (13)    | 3        | 0           | 68 (0)      | 18 (17)   | 1.5 (0)   |
| Almaverde Bio - Uova Fresche, 100 (=2)                 | Almaverde Bio - Fresh Eggs, 100 (=2)               | 128           | 0             | 9          | 12       | 371 (0)     | 137 (342)   | 0         | 0         |
| Amy's - Pesto Tortellini, 1 bowl                       | Amy's - Pesto Tortellini, 1 bowl                   | 530 (2218)    | 62            | 22         | 20       | 40          | 590         | 4         | 4         |
| Anacardi naturali biologici - Anacardi, 5              | Natural organic cashews - Cashews, 5               | 46 (2910)     | 3 (135)       | 4 (220)    | 1 (90)   | 0           | 24 (0)      | 0 (30)    | 0         |
| Bar - Cornetto alla Nutella, 60                        | Bar - Nutella Croissant, 60                        | 251 (1050)    | 29 (28)       | 13         | 5        | 36          | 400 (404)   | 10 (9)    | 2         |
| Bennet - Cornetto ai Frutti di Bosco, 1 unità          | Bennet - Berry Croissant, 1 unit                   | 392 (1431)    | 50 (39)       | 16.4 (17)  | 6.2 (8)  | 0           | 160 (0)     | 22 (0)    | 10 (0)    |
| Bio - Uova Fresche, 100 g                              | Bio - Fresh Eggs, 100 g                            | 128           | 1             | 9          | 12       | 400 (0)     | 120 (0)     | 1         | 0         |
| bio - Uovo, 1 uovo                                     | bio - egg, 1 egg                                   | 32            | 0             | 2          | 3        | 90 (0)      | 30 (0)      | 0         | 0         |
| Biscotti integrali Carrefour - Biscotti integrali, 6 g | Carrefour whole biscuits - whole biscuits, 6 g     | 189 (11799)   | 25.5 (384)    | 7.65 (114) | 3 (46)   | 0           | 300 (0)     | 8.1 (120) | 2.55 (39) |
| Brioche - Brioche preconfezionata, 100                 | Brioche - Prepackaged Brioche, 100                 | 354           | 53            | 12         | 8        | 59          | 300 (1000)  | 13        | 2         |
| Buondi - Buondi Motta al Cioccolato, 46 g              | buondi - Motta Chocolate Buondi, 46 g              | 184 (791)     | 25            | 8          | 3        | 0           | 80 (0)      | 14 (0)    | 1         |
| Cameo - Panna Cotta ai Frutti di Bosco, 94 g           | Cameo - Panna Cotta Berry, 94 g                    | 199 (833)     | 18            | 13         | 3        | 0           | 100         | 17        | 0         |
| Carbonara bianca - Carbonara bianca, 100 g             | White Carbonara - White Carbonara, 100 g           | 379 (1548)    | 41 (66)       | 17 (6)     | 14       | 60 (0)      | 560 (0)     | 0 (4)     | 2 (0)     |
| Carne - Petto di Pollo in Padella, 100 g               | Meat - Chicken Breast in Pan, 100 g                | 195 (477)     | 0             | 8 (3)      | 30 (21)  | 83 (64)     | 400 (116)   | 0         | 0         |
| Casa - Uova Ripiene, 2 porzioni                        | Casa - Stuffed Eggs, 2 servings                    | 128 (65)      | 0             | 9 (4)      | 12 (6)   | 371 (0)     | 137 (0)     | 0         | 0         |
| Casa - Vellutata di Lenticchie, Patate e Carote, 100 g | Casa - Lentil Potato Carrot Soup, 100 g            | 80 (112)      | 10 (1670)     | 2 (210)    | 4 (750)  | 0 (670)     | 200 (0)     | 2 (0)     | 4 (0)     |
| Cavolfiori cotti                                       | cooked cauliflowers                                | 48 (119)      | 4             | 3 (10)     | 2        | 0           | 288 (40004) | 1         | 3 (1)     |
| Cavolo - Cavolo Nero cotto, 100 g                      | Cabbage - Cooked Black Cabbage, 100 g              | 23 (96)       | 1             | 1          | 2        | 0           | 16 (0)      | 0         | 2 (0)     |
| Chop House Salad - Insalata, 1 porzione                | Chop House Salad - Salad, 1 salad                  | 64 (256)      | 0             | 4.5 (17)   | 6 (25)   | 185.5 (716) | 68.5 (274)  | 0         | 0         |
| Claudio - Uovo, 1 pz.                                  | Claudio - Egg, 1 pc.                               | 64 (173)      | 0             | 4.5 (12)   | 6 (17)   | 185.5 (0)   | 68.5 (0)    | 0         | 0         |
| Conchilioni con Ricotta Fresca - Pasta, 1 piatto       | Conchilioni with Fresh Ricotta - Pasta, 1 plate    | 455 (1318)    | 65 (48)       | 13 (7)     | 19 (16)  | 25 (0)      | 14 (0)      | 5 (0)     | 3 (0)     |
| Coop - Linguine allo Scolio, 275 g                     | Coop - Linguine with Scolio, 275                   | 374           | 56            | 9          | 16       | 781 (200)   | 580         | 7         | 4         |
| Cornetto vuoto - Cornetto vuoto, 1 cornetto            | Empty Croissant - Empty Croissant, 1 croissant     | 231 (858)     | 26 (24)       | 12 (11)    | 5 (3)    | 38 (0)      | 400 (0)     | 6 (5)     | 2 (1)     |
| Crackers integrali - Crackers, 1 pack                  | Wholemeal Crackers - crackers, 1 pack              | 100 (1753)    | 15 (73)       | 2 (11)     | 2 (4)    | 0           | 176 (0)     | 2 (0)     | 4 (0)     |
| Crea - Uova, 2 unità (50 g)                            | Crea - Eggs, 2 units (50 g)                        | 128           | 0             | 9          | 12       | 371 (0)     | 137 (0)     | 0         | 0         |
| Crich - Frollini al Cioccolato, 6 frollini             | crich - Chocolate Cookies, 6 cookie                | 232.5 (11573) | 29.5 (422)    | 9.5 (96)   | 4.5 (47) | 0           | 168 (0)     | 11 (0)    | 5.5 (15)  |
| Cucina Barilla - Polenta al Ragù, 100 g                | cucinabarilla - Cornmeal with Rau, 100 g           | 298 (335)     | 50 (13)       | 6 (2)      | 10 (3)   | 0           | 352 (0)     | 5 (1)     | 0 (1)     |
| Despar - Uova Biologiche, 10 g                         | Despar - Organic Eggs, 10 g                        | 13            | 0             | 1          | 1        | 45 (0)      | 14 (0)      | 0         | 0         |
| Despar - Uova Biologiche, 20 g                         | Despar - Organic Eggs, 20 g                        | 26            | 0             | 2          | 2        | 90 (0)      | 28 (0)      | 0         | 0         |
| Digestive Biscuits - Digestive Biscuits, 6 biscotti    | Digestive biscuits - Digestive Biscuits, 6 biscuit | 426 (1782)    | 55.8 (56)     | 18.6 (19)  | 6 (7)    | 0           | 480 (0)     | 13.2 (15) | 4.8 (3)   |

|                                                              |                                                           |               |             |            |            |             |             |           |            |
|--------------------------------------------------------------|-----------------------------------------------------------|---------------|-------------|------------|------------|-------------|-------------|-----------|------------|
| Eat me - Panino Fesa, 1 panino                               | Eat me - Turkey Sandwich, 1 sandwich                      | 329 (1565)    | 26 (57)     | 11 (10)    | 29 (15)    | 67 (0)      | 560 (0)     | 2 (0)     | 1 (0)      |
| EI - Uovo Medio Sodo - Uovo Sodo, 80 g                       | EI - Medium Boiled Egg - Boiled Egg 80, 80                | 64 (65)       | 0           | 4.5 (4)    | 6          | 185.5 (0)   | 68.5 (0)    | 0         | 0          |
| Esselunga - Olive all'Ascolana, 6 olive                      | Esseluna - Ascolana Olives, 6 olive                       | 240 (4017)    | 21.6 (77)   | 11.4 (38)  | 10.2 (66)  | 24 (0)      | 0           | 1200 (0)  | 3 (0)      |
| Esselunga - Trofie al Pesto e Patate, 239 g                  | esseluna - Trofie with Pesto and Potatoes, 239 g          | 568.82 (1046) | 40.63 (26)  | 35.85 (14) | 15.535 (5) | 0           | 640.52 (0)  | 1.195 (0) | 5.258 (0)  |
| Euro Uova - Uova, 2 uovo                                     | Euro Eggs - Eggs, 2 egg                                   | 154           | 1           | 10         | 15         | 380 (0)     | 150 (0)     | 0         | 0          |
| Eurospin - Fettina Panata, 100 g                             | eurospin - Breaded Slice, 100 g                           | 205 (837)     | 15 (16)     | 9 (8)      | 16         | 0           | 720 (0)     | 0 (1)     | 0          |
| Farabella - Perle di Patate con Riso, 100 g                  | Farabella - Potato Pearls with Rice, 100 g                | 185 (774)     | 41          | 1          | 4          | 0           | 520 (1300)  | 1         | 2          |
| Fatta in Casa - Torta di Grano Saraceno, 1 fetta             | Homemade Buckwheat Cake, 1 slice                          | 187 (321)     | 25 (51)     | 8 (1212)   | 3 (444)    | 0           | 320 (0)     | 14 (0)    | 1 (0)      |
| Fermenti Lattici - Fermenti, 100 g                           | Lactic Ferments - Ferments, 100 g                         | NA (30)       | NA (15)     | NA (0)     | NA (0)     | NA (0)      | NA (0)      | NA (10)   | NA (85)    |
| Fesa - Fesa di Tacchino, 100 g                               | Turkey Breast - Turkey Breast, 100                        | 111 (464)     | 0           | 1          | 25         | 62 (0)      | 48 (0)      | 0         | 0          |
| Findus - Bastoncini di Pesce, 4 bastoncini                   | Findus - Fish Sticks, 4 stick                             | 213 (887)     | 21          | 8          | 13         | 0           | 860         | 1         | 1          |
| Forno - Maritozzo, 1 pezzo                                   | Forno - Maritozzo, 1 piece                                | 157 (1515)    | 30 (52)     | 3 (14)     | 3 (7)      | 10 (0)      | 96 (0)      | 10 (0)    | 1 (0)      |
| Fresco - Filetto di Branzino, 125 g                          | Fresh Sea Bass Fillet, 125                                | 103           | 8           | 19         | 22 (206)   | 0           | 480 (0)     | 0         | 0          |
| Frittata - Frittata con Solo Uova, 1 porzione                | Omelette with Only Eggs 1 serving                         | 64 (68)       | 0           | 4.5 (5)    | 6          | 185.5 (186) | 68.5 (122)  | 0         | 0 (NA)     |
| Frittata con 4 uova - Frittata Uova, 1 uovo                  | Omelette with 4 eggs - egg omelette, 1 egg                | 75            | 0           | 6 (0)      | 5 (0)      | 200 (0)     | 85 (0)      | 0         | 0          |
| Galbani S.r.l. - Certosa Crescenza Italiana, 100 g           | Galbani Sr.l. - Italian Crescenza Cheese, 100 g           | 276 (163)     | 2 (3)       | 24 (9)     | 13 (17)    | 0           | 0 (800)     | 1 (2)     | 0 (800)    |
| Gallina Bianca - Uova Allevamento a Terra, 120 g             | Gallina Bianca - Free-range Eggs, 120 g                   | 154           | 0           | 10         | 15         | 430 (0)     | 150 (0)     | 0         | 0          |
| Generic - 2 Uova Strapazzate, 165 g                          | Generic - 2 Scrambled Eggs, 165 g                         | 128 (275)     | 0 (4)       | 9 (20)     | 12 (18)    | 371 (400)   | 137 (462)   | 0 (3)     | 0          |
| Generic - Girella al Cioccolato, 45 g                        | Generic - Chocolate Swiss Roll, 45                        | 133 (644)     | 21          | 4 (6)      | 2 (4)      | 0           | 40 (0)      | 11 (0)    | 1 (0)      |
| Generic - Pasta con Zucca, 100 g                             | Generic - Pasta with Pumpkin 100 grams                    | NA (31)       | NA (691)    | NA (57)    | NA (64)    | NA (0)      | NA (17)     | NA (276)  | NA (15)    |
| Generic - Pizza Ortolana, 1 pizza                            | Generic - Vegetable Pizza, 1 pizza                        | 1392 (795)    | 172 (1.161) | 49 (1.935) | 65 (387)   | 138 (0)     | 2272 (0)    | 3 (0)     | 4 (0)      |
| Generic - Riso al suo Homemade, 100 g                        | Generic - Homemade Rice, 100 g                            | 115 (135)     | 19 (26)     | 4 (2)      | 2 (294)    | 0           | 352 (0)     | 1 (226)   | 1 (0)      |
| Generic - Uova al Tegamino, 100 g                            | Generic - Poached Eggs, 100                               | 64 (143)      | 0 (1)       | 4.5 (10)   | 6 (13)     | 185.5 (372) | 68.5 (142)  | 0         | 0          |
| Generic - Uovo Sodo, 100 g                                   | Generic - Boiled Egg, 100                                 | 64 (128)      | 0           | 4.5 (9)    | 6 (12)     | 185.5 (0)   | 68.5 (93)   | 0         | 0          |
| Generic - Uovo Strapazzato, 1 tuorlo, 2 albumi - uova medie  | Generic - Scrambled Egg, 1 yolk, 2 whites - medium eggs   | 205.5 (214)   | 0 (1)       | 14.5 (16)  | 19 (15)    | 668.5 (575) | 200.5 (476) | 0 (1)     | 0          |
| Generic Pane Ciabatta Vitto - Ciabatta (Pane), 100 g         | Generic Ciabatta Bread, 100 g                             | 81 (69)       | 15 (13)     | 1 (86)     | 3 (199)    | 0           | 176 (177)   | 0 (112)   | 1 (0)      |
| Generico - Pasta alla Gricia, 100 g                          | Generic - Pasta alla Gricia, 100 g                        | 304 (2209)    | 26 (63)     | 18 (19)    | 8 (26)     | 20 (0)      | 232 (0)     | 1 (0)     | 2 (0)      |
| Generico - Patatine Fritte, 300 g                            | Generic - French Fries, 300 g                             | 936           | 123         | 45         | 10.2 (102) | 0           | 630         | 1         | 11.4 (114) |
| Generico - Uovo Medio Sodo, 1 medio                          | Generic - Medium Boiled Egg, 1 medium                     | 67            | 0           | 5          | 7          | 186 (0)     | 122 (0)     | 0         | 0          |
| Generico - Uovo Sodo, 1 uovo                                 | Generic - Boiled Egg, 1 egg                               | 64 (68)       | 0           | 4.5 (5)    | 6          | 185.5 (186) | 68.5 (122)  | 0         | 0 (NA)     |
| Generico - Uovo Strapazzato, 0.5 uovo grande                 | Generic - Scrambled Egg, 0.5 large egg                    | 51            | 1           | 4          | 3          | 108         | 86 (0)      | 1         | 0          |
| Girella - Girella Crema Cioccolato, 100 g                    | Swiss Roll - Chocolate Cream, 100 g                       | 266 (1393)    | 42 (58)     | 8          | 4 (7)      | 0           | 80 (0)      | 22 (0)    | 2 (0)      |
| Hamburger - Hamburger, 125 g                                 | Hamburger, 125 g                                          | 199 (1121)    | 0           | 12 (19)    | 22 (25)    | 0           | 0           | 0         | 0          |
| Home - Uovo Fritto, 1 pezzo                                  | Home - Fried Egg, 1 piece                                 | 92            | 0           | 7          | 6          | 250 (0)     | 240         | 0         | 0          |
| Homemade - Cipolla Bollita, 1                                | Homemade - Boiled Onion, 1                                | 56 (44)       | 10          | 2 (0)      | 1          | 0           | 184 (3)     | 4 (473)   | 1          |
| Homemade - Insalata di Riso, 1 porzione                      | Homemade - Rice Salad, 1 portion                          | 283 (4164)    | 33 (818)    | 12 (48)    | 11 (107)   | 40 (0)      | 57 (3192)   | 2 (6)     | 3 (0)      |
| Homemade - Pane e Marmellata, 1 fetta                        | Homemade - Bread with Jam, 1 slice                        | 75 (247)      | 15 (46)     | 1 (273)    | 3 (9)      | 0           | 144 (0)     | 3 (0)     | 2 (0)      |
| Homemade - Pane e Marmellata, 2 fette                        | Homemade - Bread with Jam, 2 slices                       | 150 (494)     | 30 (92)     | 2 (546)    | 6 (17)     | 0           | 288 (0)     | 6 (0)     | 4 (0)      |
| Homemade - Pasta Amatriciana, 100 g                          | Homemade - Pasta Amatriciana, 100 g                       | 183 (724)     | 23 (237)    | 7 (73)     | 6 (46)     | 3 (117)     | 216 (0)     | 2 (0)     | 1          |
| Homemade - Polpette di Carne e Formaggio, 100 g (4 polpette) | Homemade - Meat and Cheese Meatballs, 100 g (4 meatballs) | 228 (216)     | 8 (1285)    | 16 (978)   | 12 (1686)  | 84 (0)      | 544 (7511)  | 0         | 0          |
| Homemade - Uova al Pomodoro, 100 g                           | Homemade - Eggs in Tomato Sauce, 100 g                    | 64 (280)      | 0           | 4.5 (0)    | 6 (0)      | 185.5 (0)   | 68.5 (0)    | 0         | 0          |
| Homemade - Uova Sode, 2 uovo                                 | Homemade - Boiled Eggs, 2 eggs                            | 128 (85)      | 0           | 9 (6)      | 12 (8)     | 371 (253)   | 137 (32)    | 0         | 0          |

|                                                                                                  |                                                                                                 |             |             |            |            |             |             |          |         |
|--------------------------------------------------------------------------------------------------|-------------------------------------------------------------------------------------------------|-------------|-------------|------------|------------|-------------|-------------|----------|---------|
| Homemade - Uovo all'Occhio di Bue, 1 uovo medio, 60 g                                            | Homemade - Sunny-side Up Egg, 1 medium egg, 60 g                                                | 64 (107)    | 0 (1)       | 4.5 (8)    | 6 (7)      | 185.5 (287) | 68.5 (238)  | 0        | 0       |
| Homemade - Uovo all'Occhio di Bue, 2 uovo medio, 60 g                                            | Homemade - Sunny-side Up Egg, 2 medium eggs, 60 g                                               | 128 (79)    | 0           | 9 (4)      | 12 (10)    | 371 (665)   | 137 (69)    | 0        | 0       |
| 1 uova - Uova fresche, 2 uova                                                                    | 1 Eggs - Fresh Eggs, 2 eggs                                                                     | 128 (173)   | 0           | 9 (12)     | 12 (17)    | 371 (0)     | 137 (0)     | 0        | 0       |
| 1 Uova - Uova, 2 uovo                                                                            | 1 Eggs - Eggs, 2 eggs                                                                           | 128         | 0 (3)       | 9          | 12         | 371 (0)     | 137 (0)     | 0 (1)    | 0       |
| Insalata Iceberg - Insalata Verde, 4 piatti                                                      | Iceberg Salad - Green Salad, 4 servings                                                         | 17 (59)     | 3           | 0          | 2 (0)      | 0           | 28 (0)      | 1 (0)    | 2 (0)   |
| Intrapan - Panino Prosciutto, 100 g                                                              | Intrapan - Ham Sandwich, 100 g                                                                  | 259 (1172)  | 34 (33)     | 8 (12)     | 12 (11)    | 0           | 736 (0)     | 4 (0)    | 2 (0)   |
| Iperal Uova - Uova Sode, 2 uova                                                                  | Iperal Eggs - Boiled Eggs, 2 eggs                                                               | 128         | 0 (3)       | 9          | 12         | 371 (0)     | 137 (0)     | 0 (1)    | 0       |
| Kinder - Kinder Minis, 1 mini                                                                    | Kinder - Kinder Minis, 1 mini                                                                   | 34 (126)    | 3           | 2          | 1          | 0           | 0 (7)       | 3 (2)    | 0       |
| La Vie - Le Parisien Jambon Végétal, Cornichon, 145 g                                            | La Vie - Le Parisien Vegetable Ham, Pickle, 145 g                                               | 352         | 33          | 16         | 15         | 0           | 928 (2320)  | 3        | 0       |
| Lavazza - Caffè Espresso Macchiato, 1                                                            | Lavazza - Espresso Macchiato, 1                                                                 | 10 (14)     | 1 (2)       | 1 (0)      | 1          | 0           | 0           | 1        | 0 (20)  |
| Lavazza - Caffè Espresso, 1 tazzina (30 ml)                                                      | Lavazza - Espresso Coffee, 1 cup (30 ml)                                                        | 5 (1)       | 1 (0)       | 0          | 0          | 0           | 0 (14)      | 0        | 0       |
| Lavazza - Caffè Macchiato, 1 espresso cup                                                        | Lavazza - Macchiato Coffee, 1 espresso cup                                                      | 10 (14)     | 1 (2)       | 1 (0)      | 1          | 0           | 0           | 1        | 0 (20)  |
| Lavazza - Caffè Macchiato, 2 espresso cup                                                        | Lavazza - Macchiato Coffee, 2 espresso cups                                                     | 20 (28)     | 2 (3)       | 2 (1)      | 2          | 0           | 0           | 2        | 0 (40)  |
| Lavazza cup                                                                                      | Lavazza cup                                                                                     | 5 (14)      | 1 (2)       | 0          | 0 (1)      | 0           | 0           | 0 (1)    | 0 (20)  |
| Lavazza cup - Caffè Macchiato, 1 espresso                                                        | Lavazza Cup - Macchiato Coffee, 1 espresso                                                      | 10 (14)     | 1 (2)       | 1 (0)      | 1          | 0           | 0           | 1        | 0 (20)  |
| Lavazza Espresso, 30 ml                                                                          | Lavazza Espresso, 30 ml                                                                         | 5 (2)       | 1 (0)       | 0          | 0          | 0           | 0 (14)      | 0        | 0       |
| Lavazza Espresso, 60 ml                                                                          | Lavazza Espresso, 60 ml                                                                         | 10 (4)      | 2 (0)       | 0          | 0          | 0           | 0 (28)      | 0        | 0       |
| LeNaturelle - Uova Strapazzate, 2 piatti                                                         | LeNaturelle - Scrambled Eggs, 2 servings                                                        | 220         | 3           | 16         | 16         | 400 (0)     | 400 (0)     | 0        | 0       |
| Lidl - Hummus di Ceci, 100 g                                                                     | Lidl - Chickpea Hummus, 100 g                                                                   | 117 (1284)  | 20 (9)      | 9 (26)     | 5 (6)      | 0           | 240 (0)     | 0 (1)    | 4 (6)   |
| Lidl - Pains au Chocolat, 1 pain                                                                 | Lidl - Chocolate Pastry, 1 piece                                                                | 270 (820)   | 34 (0)      | 12 (11)    | 5 (0)      | 60 (0)      | 270 (0)     | 8 (5)    | 1 (0)   |
| Linea Gourmet Polpa e Ciccia - Hamburger di Fassona con Bacon e Cipolle Caramellate, 1 hamburger | Linea Gourmet Polpa e Ciccia - Fassona Hamburger with Bacon and Caramelized Onions, 1 hamburger | 165 (1013)  | 5           | 10 (17)    | 19 (15)    | 0           | 640 (0)     | 0 (2)    | 0       |
| Marherita - Pizza Margherita, 100 g                                                              | Margherita - Margherita Pizza, 100 g                                                            | 910 (929)   | 153 (29)    | 17 (5)     | 32 (11)    | 39 (0)      | 648 (1700)  | 2 (3)    | 7 (1)   |
| McDonald's - Patatine Fritte, 50 g                                                               | McDonald's - French Fries, 50 g                                                                 | 434 (1966)  | 54 (59)     | 21 (23)    | 5 (7)      | 0           | 400 (0)     | 0        | 5 (0)   |
| Mensa - Uova Strapazzate, 1 piatto                                                               | Cafeteria - Scrambled Eggs, 1 serving                                                           | 194         | 3           | 12         | 18         | 350 (0)     | 300         | 3        | 0       |
| Milk - Yogurt da Bere, 125 g                                                                     | Milk - Drinkable Yogurt, 125 g                                                                  | 72 (90)     | 5 (1575)    | 3 (125)    | 8 (38)     | 0           | 54 (5)      | 5 (1575) | 0       |
| Mozzarella 50 - Mozzarella, 50 g                                                                 | Mozzarella 50 - Mozzarella, 50 g                                                                | 150 (636)   | 2 (0)       | 10 (11)    | 13 (11)    | 27 (39)     | 264 (316)   | 0        | 0 (1)   |
| Mulan - Noodles con Pollo e Verdure, 100 g                                                       | Mulan - Noodles with Chicken and Vegetables, 100 g                                              | 161 (640)   | 18          | 7          | 5          | 0           | 320 (840)   | 2        | 0       |
| My Personal Trainer - Uova al Tegamino, 2 uova                                                   | My Personal Trainer - Fried Eggs, 2 eggs                                                        | 176         | 1           | 14         | 12         | 479         | 400 (0)     | 0        | 0       |
| Olio d'Oliva - Olio, 2 cucchiari                                                                 | Olive Oil - Oil, 2 tablespoons                                                                  | 176 (2092)  | 22 (0)      | 5 (0)      | 10 (0)     | 0           | 0           | 3 (0)    | 2 (0)   |
| Olio Extravergine di Oliva - Olio, 1 g                                                           | Extra Virgin Olive Oil - Oil, 1 g                                                               | 83 (229)    | 0 (43)      | 9 (4)      | 0 (4)      | 0           | 0 (1300)    | 0 (3)    | 0 (6)   |
| Pam - Pizzetta Margherita, 240 g                                                                 | Pam - Mini Margherita Pizza, 240 g                                                              | 619.2 (912) | 80.64 (201) | 22.08 (26) | 22.8 (210) | 33.6 (0)    | 1152 (0)    | 3.36 (0) | 3.6 (0) |
| Pam - Pizzetta Margherita, 80 g                                                                  | Pam - Mini Margherita Pizza, 80 g                                                               | 206.4 (304) | 26.88 (67)  | 7.36 (9)   | 7.6 (70)   | 11.2 (0)    | 384 (0)     | 1.12 (0) | 1.2 (0) |
| Pane - Pane Casareccio, 100 g                                                                    | Bread - Homemade Bread, 100 g                                                                   | 229 (828)   | 43 (0)      | 4 (92)     | 4 (0)      | 0           | 1300 (0)    | 3 (0)    | 6 (0)   |
| Pane Integrale - Pane Integrale 70 g, 0.5 fetta                                                  | Whole Wheat Bread - 70 g, 0.5 slice                                                             | 35          | 6           | 1          | 1          | 0           | 200 (0)     | 1 (0)    | 1 (10)  |
| Pane Integrale - Pane Integrale 70 g, 1 fetta                                                    | Whole Wheat Bread - 70 g, 1 slice                                                               | 69          | 13          | 1          | 3          | 0           | 400 (0)     | 2 (0)    | 2 (19)  |
| Pane Integrale - Pane Integrale 70 g, 1.5 fetta                                                  | Whole Wheat Bread - 70 g, 1.5 slices                                                            | 104         | 19          | 2          | 4          | 0           | 600 (0)     | 3 (0)    | 3 (29)  |
| Pane Integrale - Pane Integrale 70 g, 2 fette                                                    | Whole Wheat Bread - 70 g, 2 slices                                                              | 138         | 26          | 2          | 5          | 0           | 800 (0)     | 4 (0)    | 4 (38)  |
| Pane Integrale - Pane Integrale 70 g, 3 fette                                                    | Whole Wheat Bread - 70 g, 3 slices                                                              | 207         | 39          | 4          | 8          | 0           | 1200 (0)    | 6 (0)    | 6 (57)  |
| Pane Integrale fetta                                                                             | Whole Wheat Bread slice                                                                         | 69          | 13          | 1          | 3          | 0           | 400 (0)     | 2 (0)    | 2 (19)  |
| Paren - Zuppa di Legumi e Cereali, 300 g                                                         | Paren - Legume and Cereal Soup, 300 g                                                           | 333         | 36          | 10         | 15         | 0           | 1068 (2670) | 2        | 22      |
| Pasta - Aglio Olio, 1 piatto                                                                     | Pasta - Garlic and Oil, 1 plate                                                                 | 552 (1042)  | 78 (41)     | 20 (6)     | 14 (7)     | 0           | 700 (2)     | 2 (0)    | 4 (3)   |

|                                                                                   |                                                                                         |            |           |           |           |             |              |         |        |
|-----------------------------------------------------------------------------------|-----------------------------------------------------------------------------------------|------------|-----------|-----------|-----------|-------------|--------------|---------|--------|
| Pasta - Pasta in Bianco, 100 g                                                    | Pasta - Plain Pasta, 100 g                                                              | 202 (1552) | 31 (75)   | 5 (2)     | 7 (13)    | 4 (0)       | 320 (0)      | 1 (2)   | 2      |
| Pasta e Ceci, 100 g                                                               | Pasta with Chickpeas, 100 g                                                             | 160        | 25        | 5         | 5         | 0           | 232 (2320)   | 1       | 2      |
| Pavesi - Gocciolate, 7 pz                                                         | Pavesi - Gocciolate Cookies, 7 pcs                                                      | 413 (1728) | 56 (53)   | 21 (19)   | 7 (6)     | 0           | 168 (0)      | 21 (18) | 0 (3)  |
| Peperoni cotti in padella - Peperoni Saltati in Padella, 100 g                    | Cooked Peppers - Pan-fried Peppers, 100 g                                               | 45 (143)   | 7 (24)    | 2         | 1 (5)     | 0           | 104 (0)      | 4 (24)  | 1 (87) |
| Petto di Tacchino - Petto di Tacchino, 100 g                                      | Turkey Breast - Turkey Breast, 100 g                                                    | 111 (448)  | 0         | 1         | 25 (24)   | 62 (50)     | 48 (52)      | 0       | 0      |
| Piadina - Piadina, 1 piada                                                        | Flatbread - Flatbread, 1 piece                                                          | 365 (761)  | 54 (27)   | 12 (7)    | 9 (4)     | 33 (31)     | 380 (190)    | 1 (0)   | 2 (1)  |
| Pizza con Prosciutto Cotto - Pizza con Prosciutto Cotto, 100 g                    | Pizza with Cooked Ham - Pizza with Cooked Ham, 100 g                                    | 915 (937)  | 131 (30)  | 22 (7)    | 44 (10)   | 77 (0)      | 2000 (0)     | 1 (0)   | 6 (0)  |
| Pniko - Mela Val Venosta, 1 mela                                                  | Pniko - Val Venosta Apple, 1 apple                                                      | 72 (619)   | 19 (14)   | 0         | 0         | 0           | 0 (23)       | 14 (0)  | 3 (0)  |
| Prope Uovo - Uovo, 1 uovo                                                         | Prope Egg - Egg, 1 egg                                                                  | 64 (65)    | 0 (1)     | 4.5 (4)   | 6         | 185.5 (186) | 68.5 (83)    | 0       | 0      |
| Prope Uovo - Uovo, 2 uova                                                         | Prope Egg - Egg, 2 eggs                                                                 | 128 (130)  | 0 (1)     | 9         | 12        | 371 (372)   | 137 (166)    | 0       | 0      |
| Ravioli Sardi - Ravioli Ricotta e Zafferano, 1 piatto                             | Sardinian Ravioli - Ricotta and Saffron Ravioli, 1 plate                                | 217        | 35 (2809) | 7         | 9         | 0           | 115 (0)      | 1 (0)   | 2 (0)  |
| Ricky - Frittata di Albumi, 100 g                                                 | Ricky - Egg White Omelette, 100 g                                                       | 64 (222)   | 1 (2)     | 2         | 10 (6)    | 0           | 356 (0)      | 1 (0)   | 0      |
| Risotto con Crema di Melanzane e Pomodorini Confit - Cucina Botanica, 15 porzioni | Risotto with Eggplant Cream and Confit Cherry Tomatoes - Botanical Kitchen, 15 servings | 474 (767)  | 119 (99)  | 2 (29)    | 11 (21)   | 0 (11)      | 1140 (10072) | 2 (7)   | 3 (9)  |
| Ristorante - Pasta Panna e Prosciutto, 100 g                                      | Restaurant - Pasta with Cream and Ham, 100 g                                            | 334        | 35        | 16        | 16        | 50 (163)    | 800          | 4       | 2 (0)  |
| Saclà - Orzo con Verdure, 1.5 piatto                                              | Saclà - Barley with Vegetables, 1.5 plate                                               | 221 (441)  | 21 (369)  | 12 (24)   | 4 (78)    | 0           | 1950 (0)     | 2 (0)   | 6      |
| Saper di Saperi - Tortellini Bolognesi con Parmigiano Reggiano, 100 g             | Saper di Saperi - Bolognese Tortellini with Parmesan, 100 g                             | 302 (1264) | 36        | 10        | 16        | 0           | 400          | 2       | 2      |
| Sarchio - Biscotti di Avena, 1 biscotto                                           | Sarchio - Oat Biscuit, 1 biscuit                                                        | 45         | 7         | 1         | 1 (4)     | 0           | 22 (0)       | 2       | 1 (33) |
| Sisa - Panino con Fesa e Rana, 100 g                                              | Sisa - Sandwich with Turkey Breast and Cheese, 100 g                                    | 241 (1172) | 23 (0)    | 11 (15)   | 14 (36)   | 40 (0)      | 528 (0)      | 0       | 0      |
| Sole - Uova, 2 uova                                                               | Sole - Eggs, 2 eggs                                                                     | 128        | 0 (1)     | 9         | 12        | 371 (370)   | 137 (136)    | 0 (1)   | 0      |
| Sole e Rano - Base Pinsa Farinata, 150 g                                          | Sole e Rano - Pinsa Dough Base, 150 g                                                   | 456        | 74        | 11        | 13        | 0           | 1200 (2550)  | 2       | 5      |
| Soto - Bio Börek Involtini Spinaci e Feta, 300 g                                  | Soto - Organic Börek Spinach and Feta Rolls, 300 g                                      | 585        | 69        | 25        | 18        | 0           | 1440 (3600)  | 1       | 8      |
| Spaghetti di Soia con Verdure - Spaghetti, 100 g                                  | Soy Spaghetti with Vegetables, 100 g                                                    | 140 (502)  | 14 (10)   | 8         | 1         | 0           | 360 (3)      | 1 (3)   | 2 (0)  |
| Spunti Service - Panino al Prosciutto Cotto, 1 panino                             | Spunti Service - Sandwich with Cooked Ham, 1 sandwich                                   | 186 (309)  | 15 (5376) | 7.4 (6)   | 14 (1404) | 38 (0)      | 374 (192)    | 1 (204) | 1 (0)  |
| Sten - Uovo Strapazzato, 100 g                                                    | Sten - Scrambled Egg, 100 g                                                             | 84         | 0         | 11        | 13        | 200 (0)     | 124          | 1       | 0      |
| Tabella CREA - Uova di Gallina, Intero, 100 g                                     | CREA Table - Hen Eggs, Whole, 100 g                                                     | 64 (128)   | 0         | 4.5 (9)   | 6 (12)    | 185.5 (358) | 68.5 (137)   | 0       | 0      |
| Tabella CREA - Uova di Gallina, Intero, 200 g                                     | CREA Table - Hen Egg, Whole, 200 g                                                      | 147 (256)  | 1 (0)     | 10 (17)   | 13 (25)   | 423 (716)   | 140 (274)    | 1 (0)   | 0      |
| Taliata - Taliata di Scottona, 100 g                                              | Taliata - Beef Striploin, 100 g                                                         | 117 (100)  | 11 (21)   | 7 (1)     | 3 (103)   | 0           | 7 (0)        | 6 (20)  | 2      |
| Taliatelle - Taliatelle al Ragù, 100 g                                            | Tagliatelle - Tagliatelle with Ragù, 100 g                                              | 280 (900)  | 41 (14)   | 7 (15)    | 13 (6)    | 0           | 0 (1)        | 5 (2)   | 0 (1)  |
| Toast al Prosciutto e Formaggio, 1 toast                                          | Ham and Cheese Toast, 1 toast                                                           | 388 (1623) | 70        | 10        | 4         | 0           | 0            | 1       | 3      |
| Topina - Suo Pomodoro e Mozzarella, 1 mozzarella e il suo                         | Topina - Tomato and Mozzarella, 1 mozzarella and its portion                            | 128 (238)  | 0 (4)     | 9 (16)    | 12 (20)   | 371 (0)     | 137 (0)      | 0       | 0      |
| Topsix - Barretta alla Frutta, 1 barretta                                         | Topsix - Fruit Bar, 1 bar                                                               | 64 (77)    | 0         | 4.5 (5)   | 6 (7)     | 185.5 (185) | 68.5 (70)    | 0       | 0      |
| Tortellini - Ricotta e Spinaci, 1 porzione                                        | Tortellini - Ricotta and Spinach, 1 portion                                             | 64 (256)   | 0 (1)     | 4.5 (17)  | 6 (24)    | 185.5 (0)   | 68.5 (0)     | 0       | 0      |
| Trianoli di Mais Biologico, 100 g                                                 | Organic Corn Trianoli, 100 g                                                            | 128 (173)  | 0         | 9 (12)    | 12 (17)   | 371 (0)     | 137 (0)      | 0       | 0      |
| Uova - Uova Bollite Carmelo, 60 g                                                 | Eggs - Boiled Eggs Carmelo, 60 g                                                        | 64 (87)    | 0         | 4.5 (6)   | 6 (8)     | 185.5 (0)   | 68.5 (0)     | 0       | 0      |
| Uova - Uova Fresche, 2 uova                                                       | Eggs - Fresh Eggs, 2 eggs                                                               | 128 (93)   | 0         | 9 (6)     | 12 (8)    | 371 (242)   | 137 (92)     | 0       | 0      |
| Uova - Uova Fresche, 3 uova                                                       | Eggs - Fresh Eggs, 3 eggs                                                               | 192 (384)  | 0 (2)     | 13.5 (26) | 18 (36)   | 556.5 (0)   | 205.5 (0)    | 0       | 0      |
| Uova - Uova Sode, 100 g                                                           | Eggs - Boiled Eggs, 100 g                                                               | 65 (128)   | 0 (1)     | 4 (9)     | 6 (12)    | 186 (0)     | 64 (0)       | 0       | 0      |
| Uova - Uova Strapazzate, 2 uova                                                   | Eggs - Scrambled Eggs, 2 eggs                                                           | 130 (256)  | 0 (1)     | 8 (17)    | 12 (24)   | 372 (0)     | 128 (0)      | 0       | 0      |
| Uova - Uova Strapazzate, 3 uova                                                   | Eggs - Scrambled Eggs, 3 eggs                                                           | 195 (384)  | 0 (2)     | 12 (26)   | 18 (36)   | 558 (0)     | 192 (0)      | 0       | 0      |

|                                                    |                                                 |            |         |          |         |             |            |        |        |
|----------------------------------------------------|-------------------------------------------------|------------|---------|----------|---------|-------------|------------|--------|--------|
| Uova - Uova, 1 uovo                                | Eggs - Egg, 1 egg                               | 64 (128)   | 0       | 4.5 (9)  | 6 (12)  | 185.5 (371) | 68.5 (122) | 0      | 0      |
| Uova - Uova, 2 uova                                | Eggs - Eggs, 2 eggs                             | 136 (256)  | 0 (1)   | 10 (17)  | 10 (25) | 372 (742)   | 240 (244)  | 1      | 0      |
| Uova al Tonno - Uova Sode Ripiene di Tonno, 1 uovo | Tuna Eggs - Boiled Egg Stuffed with Tuna, 1 egg | 128 (87)   | 0       | 9 (6)    | 12 (8)  | 371 (0)     | 137 (0)    | 0      | 0      |
| Uova in Camicia - Secondi di Uova, 1 pezzo         | Poached Eggs - Egg Main Dish, 1 piece           | 64 (84)    | 0       | 4.5 (11) | 6 (13)  | 185.5 (0)   | 68.5 (124) | 0 (1)  | 0      |
| Uova Medie - Uova, 140 g                           | Medium Eggs - Eggs, 140 g                       | 128 (130)  | 0 (1)   | 9        | 12 (11) | 371 (0)     | 137 (0)    | 0 (1)  | 0      |
| Uova Mie Galline - Uova Strapazzate, 100 g         | My Chicken Eggs - Scrambled Eggs, 100 g         | 128        | 0       | 9        | 12      | 372 (0)     | 240 (0)    | 0      | 0      |
| Uova Sode, 2                                       | Boiled Eggs, 2                                  | 223        | 1       | 19       | 13      | 400 (0)     | 300 (0)    | 1      | 0      |
| Uova Strapazzate                                   | Scrambled Eggs                                  | 335        | 2       | 28       | 19      | 645 (0)     | 516 (0)    | 1      | 0      |
| Uovo - Uovo Cotto, 1 uovo da 50 g                  | Egg - Cooked Egg, 1 egg of 50 g                 | 64 (35)    | 0 (1)   | 4.5 (2)  | 6 (3)   | 185.5 (0)   | 68.5 (0)   | 0      | 0      |
| Uovo - Uovo Medio, 0.5 uovo medio                  | Egg - Medium Egg, 0.5 medium egg                | 33         | 0       | 2        | 3       | 90 (0)      | 30 (0)     | 0      | 0      |
| Uovo - Uovo Medio, 0.7 uovo medio                  | Egg - Medium Egg, 0.7 medium egg                | 46         | 0       | 3        | 4       | 120 (0)     | 50 (0)     | 0      | 0      |
| Uovo - Uovo Medio, 1 uovo medio                    | Egg - Medium Egg, 1 medium egg                  | 64 (65)    | 0       | 4.5 (4)  | 6       | 185.5 (0)   | 68.5 (0)   | 0      | 0      |
| Uovo - Uovo Medio, 1.3 uovo medio                  | Egg - Medium Egg, 1.3 medium egg                | 85         | 0       | 6        | 7       | 210 (0)     | 80 (0)     | 0      | 0      |
| Uovo - Uovo Medio, 2 uova medie                    | Egg - Medium Egg, 2 medium eggs                 | 64 (149)   | 0 (2)   | 4.5 (11) | 6 (10)  | 185.5 (277) | 68.5 (145) | 0 (1)  | 0      |
| Uovo - Uovo Medio, 2 uovo medio                    | Egg - Medium Egg, 2 medium eggs                 | 130        | 1       | 9        | 11      | 372 (0)     | 128 (0)    | 1      | 0      |
| Uovo - Uovo Medio, 2.5 uovo medio                  | Egg - Medium Egg, 2.5 medium eggs               | 163        | 1       | 11       | 14      | 465 (0)     | 128 (0)    | 1      | 0      |
| Uovo 1 - Uovo, 100 g                               | Egg 1 - Egg, 100 g                              | 128        | 1       | 9        | 12      | 423 (0)     | 140 (0)    | 1      | 0      |
| Uovo Bollito, 1                                    | Boiled Egg, 1                                   | 64 (89)    | 0       | 4.5 (7)  | 6       | 185.5 (210) | 68.5 (0)   | 0      | 0      |
| Uovo Occhio di Bue, 46 g                           | Sunny-side Up Egg, 46 g                         | 89         | 0       | 7        | 6       | 210         | 96 (0)     | 0      | 0      |
| Uovo Sodo, 1                                       | Boiled Egg, 1                                   | 64 (130)   | 0 (1)   | 4.5 (9)  | 6 (11)  | 185.5 (0)   | 68.5 (0)   | 0 (1)  | 0      |
| Uovo Sodo, 2                                       | Boiled Eggs, 2                                  | 128 (34)   | 0       | 9 (2)    | 12 (3)  | 371 (93)    | 137 (61)   | 0      | 0      |
| Uovo Strapazzato                                   | Scrambled Egg                                   | 64 (NA)    | 0 (NA)  | 4.5 (NA) | 6 (NA)  | 185.5 (NA)  | 68.5 (NA)  | 0 (NA) | 0 (NA) |
| Gustato - Aglio, Olio e Peperoncino, 100 g         | Gustato - Garlic, Oil and Chili, 100 g          | 225 (1778) | 32 (4)  | 8 (45)   | 6 (1)   | 0           | 288 (0)    | 1 (0)  | 2 (0)  |
| Vallelata - Ricotta Vallelata, 100 g               | Vallelata - Vallelata Ricotta, 100 g            | 138 (686)  | 5 (6)   | 8 (12)   | 11 (8)  | 31 (0)      | 124 (0)    | 0 (5)  | 0      |
| Vemondo (Lidl) - Cotoletta Vegetale, 80 g          | Vemondo (Lidl) - Vegetable Cutlet, 80 g         | 178        | 5       | 10       | 18      | 0           | 800 (2000) | 1      | 2      |
| Vemondo Lidl - Noci Vegetali, 100 g                | Vemondo Lidl - Mixed Nuts, 100 g                | 233 (1109) | 21 (16) | 10 (17)  | 13 (10) | 0           | 560 (1)    | 0      | 5      |
| VVV - Sale, 1 cucchiaino                           | VVV - Salt, 1 teaspoon                          | NA (0)     | NA (0)  | NA (0)   | NA (0)  | NA (0)      | NA (2000)  | NA (0) | NA (0) |
| Zucchine Scure, 200 g                              | Dark Zucchini, 200 g                            | 177 (1347) | 6 (11)  | 14 (24)  | 11 (13) | 35 (0)      | 400 (0)    | 2 (0)  | 1 (0)  |
